# Supplementary material for: Sustained activation of detoxification pathways promotes liver carcinogenesis in response to chronic bile acid-mediated damage
Source: PLoS Genet. 2018 May 7;14(5):e1007380. doi: 10.1371/journal.pgen.1007380 (PMC5957449; doi:10.1371/journal.pgen.1007380)
Supplement: S1 Table — The list of GO terms refers to data shown in S1C Fig. (XLSX) [file pgen.1007380.s008.xlsx]

## Sheet: Functional Annot Chart
Category	Term	Count	%	PValue	Genes	List Total	Pop Hits	Pop Total	Fold Enrichment	Bonferroni	Benjamini	FDR
GOTERM_BP_FAT	GO:0002684~positive regulation of immune system process	10	19.6078	5.07801e-09	ENSMUSG00000036594, ENSMUSG00000036887, ENSMUSG00000029084, ENSMUSG00000059498, ENSMUSG00000026177, ENSMUSG00000024610, ENSMUSG00000078452, ENSMUSG00000026395, ENSMUSG00000076617, ENSMUSG00000036896	40	206	13588	16.4903	3.78818e-06	3.78818e-06	7.72317e-06
GOTERM_BP_FAT	GO:0002252~immune effector process	8	15.6863	5.99289e-08	ENSMUSG00000036594, ENSMUSG00000036887, ENSMUSG00000059498, ENSMUSG00000026177, ENSMUSG00000024610, ENSMUSG00000026395, ENSMUSG00000076617, ENSMUSG00000036896	40	126	13588	21.5683	4.47059e-05	2.23532e-05	9.11462e-05
GOTERM_BP_FAT	GO:0002449~lymphocyte mediated immunity	7	13.7255	7.05847e-08	ENSMUSG00000036594, ENSMUSG00000036887, ENSMUSG00000059498, ENSMUSG00000026177, ENSMUSG00000024610, ENSMUSG00000076617, ENSMUSG00000036896	40	76	13588	31.2882	5.26548e-05	1.75519e-05	0.000107353
GOTERM_BP_FAT	GO:0050778~positive regulation of immune response	8	15.6863	1.01466e-07	ENSMUSG00000036594, ENSMUSG00000036887, ENSMUSG00000059498, ENSMUSG00000026177, ENSMUSG00000078452, ENSMUSG00000026395, ENSMUSG00000076617, ENSMUSG00000036896	40	136	13588	19.9824	7.5691e-05	1.89233e-05	0.000154321
GOTERM_BP_FAT	GO:0002460~adaptive immune response based on somatic recombination of immune receptors built from immunoglobulin superfamily domains	7	13.7255	1.29065e-07	ENSMUSG00000036594, ENSMUSG00000036887, ENSMUSG00000059498, ENSMUSG00000026177, ENSMUSG00000024610, ENSMUSG00000076617, ENSMUSG00000036896	40	84	13588	28.3083	9.62782e-05	1.92564e-05	0.000196296
GOTERM_BP_FAT	GO:0002250~adaptive immune response	7	13.7255	1.29065e-07	ENSMUSG00000036594, ENSMUSG00000036887, ENSMUSG00000059498, ENSMUSG00000026177, ENSMUSG00000024610, ENSMUSG00000076617, ENSMUSG00000036896	40	84	13588	28.3083	9.62782e-05	1.92564e-05	0.000196296
GOTERM_BP_FAT	GO:0002443~leukocyte mediated immunity	7	13.7255	1.82596e-07	ENSMUSG00000036594, ENSMUSG00000036887, ENSMUSG00000059498, ENSMUSG00000026177, ENSMUSG00000024610, ENSMUSG00000076617, ENSMUSG00000036896	40	89	13588	26.718	0.000136207	2.27025e-05	0.000277711
GOTERM_BP_FAT	GO:0006955~immune response	11	21.5686	5.86027e-07	ENSMUSG00000036594, ENSMUSG00000036887, ENSMUSG00000059498, ENSMUSG00000026177, ENSMUSG00000024610, ENSMUSG00000023349, ENSMUSG00000078452, ENSMUSG00000079227, ENSMUSG00000026395, ENSMUSG00000076617, ENSMUSG00000036896	40	471	13588	7.93355	0.00043708	6.24518e-05	0.000891288
GOTERM_BP_FAT	GO:0048584~positive regulation of response to stimulus	8	15.6863	8.54374e-07	ENSMUSG00000036594, ENSMUSG00000036887, ENSMUSG00000059498, ENSMUSG00000026177, ENSMUSG00000078452, ENSMUSG00000026395, ENSMUSG00000076617, ENSMUSG00000036896	40	186	13588	14.6108	0.00063716	7.96672e-05	0.00129941
GOTERM_BP_FAT	GO:0016064~immunoglobulin mediated immune response	6	11.7647	9.2949e-07	ENSMUSG00000036594, ENSMUSG00000036887, ENSMUSG00000059498, ENSMUSG00000024610, ENSMUSG00000076617, ENSMUSG00000036896	40	63	13588	32.3524	0.00069316	7.70415e-05	0.00141366
GOTERM_BP_FAT	GO:0019724~B cell mediated immunity	6	11.7647	1.08773e-06	ENSMUSG00000036594, ENSMUSG00000036887, ENSMUSG00000059498, ENSMUSG00000024610, ENSMUSG00000076617, ENSMUSG00000036896	40	65	13588	31.3569	0.000811117	8.11414e-05	0.00165432
GOTERM_BP_FAT	GO:0051249~regulation of lymphocyte activation	7	13.7255	3.12138e-06	ENSMUSG00000036594, ENSMUSG00000044206, ENSMUSG00000029084, ENSMUSG00000024610, ENSMUSG00000078452, ENSMUSG00000026395, ENSMUSG00000076617	40	144	13588	16.5132	0.00232585	0.000211664	0.00474722
GOTERM_BP_FAT	GO:0002694~regulation of leukocyte activation	7	13.7255	4.605e-06	ENSMUSG00000036594, ENSMUSG00000044206, ENSMUSG00000029084, ENSMUSG00000024610, ENSMUSG00000078452, ENSMUSG00000026395, ENSMUSG00000076617	40	154	13588	15.4409	0.00342944	0.000286237	0.00700354
GOTERM_BP_FAT	GO:0019882~antigen processing and presentation	6	11.7647	4.64735e-06	ENSMUSG00000036594, ENSMUSG00000059498, ENSMUSG00000026177, ENSMUSG00000024610, ENSMUSG00000078452, ENSMUSG00000076617	40	87	13588	23.4276	0.00346093	0.000266652	0.00706796
GOTERM_BP_FAT	GO:0050865~regulation of cell activation	7	13.7255	4.96126e-06	ENSMUSG00000036594, ENSMUSG00000044206, ENSMUSG00000029084, ENSMUSG00000024610, ENSMUSG00000078452, ENSMUSG00000026395, ENSMUSG00000076617	40	156	13588	15.2429	0.00369427	0.00026433	0.00754535
GOTERM_BP_FAT	GO:0051251~positive regulation of lymphocyte activation	6	11.7647	6.8037e-06	ENSMUSG00000036594, ENSMUSG00000029084, ENSMUSG00000024610, ENSMUSG00000078452, ENSMUSG00000026395, ENSMUSG00000076617	40	94	13588	21.683	0.00506272	0.000338315	0.0103473
GOTERM_BP_FAT	GO:0002696~positive regulation of leukocyte activation	6	11.7647	8.77315e-06	ENSMUSG00000036594, ENSMUSG00000029084, ENSMUSG00000024610, ENSMUSG00000078452, ENSMUSG00000026395, ENSMUSG00000076617	40	99	13588	20.5879	0.00652343	0.000408966	0.0133423
GOTERM_BP_FAT	GO:0050867~positive regulation of cell activation	6	11.7647	9.67538e-06	ENSMUSG00000036594, ENSMUSG00000029084, ENSMUSG00000024610, ENSMUSG00000078452, ENSMUSG00000026395, ENSMUSG00000076617	40	101	13588	20.1802	0.00719188	0.00042449	0.0147143
GOTERM_BP_FAT	GO:0000165~MAPKKK cascade	6	11.7647	1.74518e-05	ENSMUSG00000064330, ENSMUSG00000026177, ENSMUSG00000024610, ENSMUSG00000026395, ENSMUSG00000076617, ENSMUSG00000007655	40	114	13588	17.8789	0.0129348	0.000723024	0.0265392
GOTERM_BP_FAT	GO:0006952~defense response	9	17.6471	3.28186e-05	ENSMUSG00000036594, ENSMUSG00000036887, ENSMUSG00000059498, ENSMUSG00000026177, ENSMUSG00000024610, ENSMUSG00000079227, ENSMUSG00000026395, ENSMUSG00000069516, ENSMUSG00000036896	40	448	13588	6.82433	0.0241858	0.00128775	0.0499024
GOTERM_BP_FAT	GO:0043405~regulation of MAP kinase activity	5	9.80392	9.47878e-05	ENSMUSG00000064330, ENSMUSG00000024610, ENSMUSG00000026395, ENSMUSG00000076617, ENSMUSG00000007655	40	84	13588	20.2202	0.0682727	0.00352951	0.144066
GOTERM_BP_FAT	GO:0048002~antigen processing and presentation of peptide antigen	4	7.84314	0.000134268	ENSMUSG00000036594, ENSMUSG00000059498, ENSMUSG00000026177, ENSMUSG00000024610	40	35	13588	38.8229	0.095317	0.00475867	0.204014
GOTERM_BP_FAT	GO:0045859~regulation of protein kinase activity	6	11.7647	0.000179742	ENSMUSG00000064330, ENSMUSG00000026177, ENSMUSG00000024610, ENSMUSG00000026395, ENSMUSG00000076617, ENSMUSG00000007655	40	186	13588	10.9581	0.125497	0.00607688	0.273021
GOTERM_BP_FAT	GO:0006897~endocytosis	6	11.7647	0.000188935	ENSMUSG00000059498, ENSMUSG00000026177, ENSMUSG00000014542, ENSMUSG00000040990, ENSMUSG00000026712, ENSMUSG00000007655	40	188	13588	10.8415	0.131475	0.00610989	0.286967
GOTERM_BP_FAT	GO:0010324~membrane invagination	6	11.7647	0.000188935	ENSMUSG00000059498, ENSMUSG00000026177, ENSMUSG00000014542, ENSMUSG00000040990, ENSMUSG00000026712, ENSMUSG00000007655	40	188	13588	10.8415	0.131475	0.00610989	0.286967
GOTERM_BP_FAT	GO:0043549~regulation of kinase activity	6	11.7647	0.000208396	ENSMUSG00000064330, ENSMUSG00000026177, ENSMUSG00000024610, ENSMUSG00000026395, ENSMUSG00000076617, ENSMUSG00000007655	40	192	13588	10.6156	0.143996	0.00645739	0.316483
GOTERM_BP_FAT	GO:0051338~regulation of transferase activity	6	11.7647	0.000246099	ENSMUSG00000064330, ENSMUSG00000026177, ENSMUSG00000024610, ENSMUSG00000026395, ENSMUSG00000076617, ENSMUSG00000007655	40	199	13588	10.2422	0.167742	0.0073176	0.37364
GOTERM_BP_FAT	GO:0000187~activation of MAPK activity	4	7.84314	0.000390299	ENSMUSG00000064330, ENSMUSG00000024610, ENSMUSG00000026395, ENSMUSG00000076617	40	50	13588	27.176	0.252648	0.0111383	0.591964
GOTERM_BP_FAT	GO:0045860~positive regulation of protein kinase activity	5	9.80392	0.000424446	ENSMUSG00000064330, ENSMUSG00000026177, ENSMUSG00000024610, ENSMUSG00000026395, ENSMUSG00000076617	40	124	13588	13.6976	0.271454	0.0116613	0.6436
GOTERM_BP_FAT	GO:0033674~positive regulation of kinase activity	5	9.80392	0.000507621	ENSMUSG00000064330, ENSMUSG00000026177, ENSMUSG00000024610, ENSMUSG00000026395, ENSMUSG00000076617	40	130	13588	13.0654	0.315305	0.0134368	0.769265
GOTERM_BP_FAT	GO:0007243~protein kinase cascade	6	11.7647	0.000538674	ENSMUSG00000064330, ENSMUSG00000026177, ENSMUSG00000024610, ENSMUSG00000026395, ENSMUSG00000076617, ENSMUSG00000007655	40	236	13588	8.63644	0.330992	0.013765	0.816145
GOTERM_BP_FAT	GO:0051347~positive regulation of transferase activity	5	9.80392	0.000585319	ENSMUSG00000064330, ENSMUSG00000026177, ENSMUSG00000024610, ENSMUSG00000026395, ENSMUSG00000076617	40	135	13588	12.5815	0.353884	0.0144537	0.886523
GOTERM_BP_FAT	GO:0043406~positive regulation of MAP kinase activity	4	7.84314	0.000635914	ENSMUSG00000064330, ENSMUSG00000024610, ENSMUSG00000026395, ENSMUSG00000076617	40	59	13588	23.0305	0.377831	0.0151913	0.962809
GOTERM_BP_FAT	GO:0043085~positive regulation of catalytic activity	6	11.7647	0.000849354	ENSMUSG00000064330, ENSMUSG00000026177, ENSMUSG00000024610, ENSMUSG00000026395, ENSMUSG00000076617, ENSMUSG00000007655	40	261	13588	7.8092	0.469475	0.0196141	1.28402
GOTERM_BP_FAT	GO:0016044~membrane organization	6	11.7647	0.00102198	ENSMUSG00000059498, ENSMUSG00000026177, ENSMUSG00000014542, ENSMUSG00000040990, ENSMUSG00000026712, ENSMUSG00000007655	40	272	13588	7.49338	0.533633	0.0228496	1.54309
GOTERM_BP_FAT	GO:0042325~regulation of phosphorylation	6	11.7647	0.00135917	ENSMUSG00000064330, ENSMUSG00000026177, ENSMUSG00000024610, ENSMUSG00000026395, ENSMUSG00000076617, ENSMUSG00000007655	40	290	13588	7.02828	0.637463	0.0294012	2.04733
GOTERM_BP_FAT	GO:0050670~regulation of lymphocyte proliferation	4	7.84314	0.00154171	ENSMUSG00000044206, ENSMUSG00000029084, ENSMUSG00000026395, ENSMUSG00000076617	40	80	13588	16.985	0.683681	0.032351	2.31929
GOTERM_BP_FAT	GO:0032944~regulation of mononuclear cell proliferation	4	7.84314	0.00154171	ENSMUSG00000044206, ENSMUSG00000029084, ENSMUSG00000026395, ENSMUSG00000076617	40	80	13588	16.985	0.683681	0.032351	2.31929
GOTERM_BP_FAT	GO:0019220~regulation of phosphate metabolic process	6	11.7647	0.00160214	ENSMUSG00000064330, ENSMUSG00000026177, ENSMUSG00000024610, ENSMUSG00000026395, ENSMUSG00000076617, ENSMUSG00000007655	40	301	13588	6.77143	0.697645	0.0326806	2.40916
GOTERM_BP_FAT	GO:0051174~regulation of phosphorus metabolic process	6	11.7647	0.00160214	ENSMUSG00000064330, ENSMUSG00000026177, ENSMUSG00000024610, ENSMUSG00000026395, ENSMUSG00000076617, ENSMUSG00000007655	40	301	13588	6.77143	0.697645	0.0326806	2.40916
GOTERM_BP_FAT	GO:0070663~regulation of leukocyte proliferation	4	7.84314	0.00165525	ENSMUSG00000044206, ENSMUSG00000029084, ENSMUSG00000026395, ENSMUSG00000076617	40	82	13588	16.5707	0.709409	0.0328494	2.48809
GOTERM_BP_FAT	GO:0044093~positive regulation of molecular function	6	11.7647	0.00172259	ENSMUSG00000064330, ENSMUSG00000026177, ENSMUSG00000024610, ENSMUSG00000026395, ENSMUSG00000076617, ENSMUSG00000007655	40	306	13588	6.66078	0.72367	0.0332799	2.58808
GOTERM_BP_FAT	GO:0030890~positive regulation of B cell proliferation	3	5.88235	0.00178823	ENSMUSG00000029084, ENSMUSG00000026395, ENSMUSG00000076617	40	22	13588	46.3227	0.736897	0.0336568	2.68544
GOTERM_BP_FAT	GO:0002253~activation of immune response	4	7.84314	0.00189774	ENSMUSG00000036887, ENSMUSG00000026395, ENSMUSG00000076617, ENSMUSG00000036896	40	86	13588	15.8	0.757574	0.0348063	2.84769
GOTERM_BP_FAT	GO:0002478~antigen processing and presentation of exogenous peptide antigen	3	5.88235	0.00195499	ENSMUSG00000036594, ENSMUSG00000059498, ENSMUSG00000024610	40	23	13588	44.3087	0.767729	0.0349797	2.93241
GOTERM_BP_FAT	GO:0016192~vesicle-mediated transport	7	13.7255	0.00196464	ENSMUSG00000059498, ENSMUSG00000026177, ENSMUSG00000014542, ENSMUSG00000040990, ENSMUSG00000026712, ENSMUSG00000076617, ENSMUSG00000007655	40	466	13588	5.10279	0.769399	0.0343271	2.94669
GOTERM_BP_FAT	GO:0019884~antigen processing and presentation of exogenous antigen	3	5.88235	0.00289458	ENSMUSG00000036594, ENSMUSG00000059498, ENSMUSG00000024610	40	28	13588	36.3964	0.884962	0.0490468	4.313
GOTERM_BP_FAT	GO:0050863~regulation of T cell activation	4	7.84314	0.0036248	ENSMUSG00000036594, ENSMUSG00000044206, ENSMUSG00000024610, ENSMUSG00000026395	40	108	13588	12.5815	0.933397	0.0597114	5.37325
GOTERM_BP_FAT	GO:0030888~regulation of B cell proliferation	3	5.88235	0.0037708	ENSMUSG00000029084, ENSMUSG00000026395, ENSMUSG00000076617	40	32	13588	31.8469	0.940295	0.0607088	5.58392
GOTERM_BP_FAT	GO:0045582~positive regulation of T cell differentiation	3	5.88235	0.0037708	ENSMUSG00000036594, ENSMUSG00000024610, ENSMUSG00000026395	40	32	13588	31.8469	0.940295	0.0607088	5.58392
GOTERM_BP_FAT	GO:0006954~inflammatory response	5	9.80392	0.0038229	ENSMUSG00000036887, ENSMUSG00000059498, ENSMUSG00000026177, ENSMUSG00000079227, ENSMUSG00000036896	40	225	13588	7.54889	0.942579	0.0602264	5.65898
GOTERM_BP_FAT	GO:0002824~positive regulation of adaptive immune response based on somatic recombination of immune receptors built from immunoglobulin superfamily domains	3	5.88235	0.00424957	ENSMUSG00000059498, ENSMUSG00000026177, ENSMUSG00000026395	40	34	13588	29.9735	0.958287	0.0653605	6.27167
GOTERM_BP_FAT	GO:0045807~positive regulation of endocytosis	3	5.88235	0.00424957	ENSMUSG00000059498, ENSMUSG00000026177, ENSMUSG00000076617	40	34	13588	29.9735	0.958287	0.0653605	6.27167
GOTERM_BP_FAT	GO:0002821~positive regulation of adaptive immune response	3	5.88235	0.00424957	ENSMUSG00000059498, ENSMUSG00000026177, ENSMUSG00000026395	40	34	13588	29.9735	0.958287	0.0653605	6.27167
GOTERM_BP_FAT	GO:0045621~positive regulation of lymphocyte differentiation	3	5.88235	0.00424957	ENSMUSG00000036594, ENSMUSG00000024610, ENSMUSG00000026395	40	34	13588	29.9735	0.958287	0.0653605	6.27167
GOTERM_BP_FAT	GO:0002455~humoral immune response mediated by circulating immunoglobulin	3	5.88235	0.00449898	ENSMUSG00000036887, ENSMUSG00000076617, ENSMUSG00000036896	40	35	13588	29.1171	0.965397	0.0676802	6.62809
GOTERM_BP_FAT	GO:0050871~positive regulation of B cell activation	3	5.88235	0.00501767	ENSMUSG00000029084, ENSMUSG00000026395, ENSMUSG00000076617	40	37	13588	27.5432	0.976543	0.0737247	7.36528
GOTERM_BP_FAT	GO:0051130~positive regulation of cellular component organization	4	7.84314	0.00509926	ENSMUSG00000059498, ENSMUSG00000026177, ENSMUSG00000076617, ENSMUSG00000007655	40	122	13588	11.1377	0.977935	0.0734392	7.48075
GOTERM_BP_FAT	GO:0002708~positive regulation of lymphocyte mediated immunity	3	5.88235	0.0058448	ENSMUSG00000059498, ENSMUSG00000078452, ENSMUSG00000026395	40	40	13588	25.4775	0.987387	0.0821721	8.5296
GOTERM_BP_FAT	GO:0002705~positive regulation of leukocyte mediated immunity	3	5.88235	0.0058448	ENSMUSG00000059498, ENSMUSG00000078452, ENSMUSG00000026395	40	40	13588	25.4775	0.987387	0.0821721	8.5296
GOTERM_BP_FAT	GO:0051050~positive regulation of transport	4	7.84314	0.00634475	ENSMUSG00000059498, ENSMUSG00000026177, ENSMUSG00000076617, ENSMUSG00000007655	40	132	13588	10.2939	0.991333	0.0872678	9.22671
GOTERM_BP_FAT	GO:0001817~regulation of cytokine production	4	7.84314	0.0073157	ENSMUSG00000044206, ENSMUSG00000059498, ENSMUSG00000026177, ENSMUSG00000078452	40	139	13588	9.77554	0.995821	0.0981891	10.5664
GOTERM_BP_FAT	GO:0002699~positive regulation of immune effector process	3	5.88235	0.00767209	ENSMUSG00000059498, ENSMUSG00000078452, ENSMUSG00000026395	40	46	13588	22.1543	0.996803	0.100933	11.0535
GOTERM_BP_FAT	GO:0045580~regulation of T cell differentiation	3	5.88235	0.00833137	ENSMUSG00000036594, ENSMUSG00000024610, ENSMUSG00000026395	40	48	13588	21.2312	0.998053	0.107275	11.948
GOTERM_BP_FAT	GO:0050671~positive regulation of lymphocyte proliferation	3	5.88235	0.00901525	ENSMUSG00000029084, ENSMUSG00000026395, ENSMUSG00000076617	40	50	13588	20.382	0.998836	0.113648	12.8671
GOTERM_BP_FAT	GO:0032946~positive regulation of mononuclear cell proliferation	3	5.88235	0.00901525	ENSMUSG00000029084, ENSMUSG00000026395, ENSMUSG00000076617	40	50	13588	20.382	0.998836	0.113648	12.8671
GOTERM_BP_FAT	GO:0050801~ion homeostasis	5	9.80392	0.00962531	ENSMUSG00000030409, ENSMUSG00000026177, ENSMUSG00000026395, ENSMUSG00000031129, ENSMUSG00000007655	40	293	13588	5.79693	0.999265	0.118899	13.6793
GOTERM_BP_FAT	GO:0030100~regulation of endocytosis	3	5.88235	0.00972345	ENSMUSG00000059498, ENSMUSG00000026177, ENSMUSG00000076617	40	52	13588	19.5981	0.999317	0.118099	13.8093
GOTERM_BP_FAT	GO:0070665~positive regulation of leukocyte proliferation	3	5.88235	0.00972345	ENSMUSG00000029084, ENSMUSG00000026395, ENSMUSG00000076617	40	52	13588	19.5981	0.999317	0.118099	13.8093
GOTERM_BP_FAT	GO:0050730~regulation of peptidyl-tyrosine phosphorylation	3	5.88235	0.0100866	ENSMUSG00000026395, ENSMUSG00000076617, ENSMUSG00000007655	40	53	13588	19.2283	0.999481	0.120308	14.2888
GOTERM_BP_FAT	GO:0006959~humoral immune response	3	5.88235	0.0104557	ENSMUSG00000036887, ENSMUSG00000076617, ENSMUSG00000036896	40	54	13588	18.8722	0.999607	0.122504	14.7735
GOTERM_BP_FAT	GO:0050864~regulation of B cell activation	3	5.88235	0.0108307	ENSMUSG00000029084, ENSMUSG00000026395, ENSMUSG00000076617	40	55	13588	18.5291	0.999704	0.12469	15.2635
GOTERM_BP_FAT	GO:0002819~regulation of adaptive immune response	3	5.88235	0.0112116	ENSMUSG00000059498, ENSMUSG00000026177, ENSMUSG00000026395	40	56	13588	18.1982	0.999778	0.126863	15.7584
GOTERM_BP_FAT	GO:0002822~regulation of adaptive immune response based on somatic recombination of immune receptors built from immunoglobulin superfamily domains	3	5.88235	0.0112116	ENSMUSG00000059498, ENSMUSG00000026177, ENSMUSG00000026395	40	56	13588	18.1982	0.999778	0.126863	15.7584
GOTERM_BP_FAT	GO:0001960~negative regulation of cytokine-mediated signaling pathway	2	3.92157	0.0114326	ENSMUSG00000026395, ENSMUSG00000007655	40	4	13588	169.85	0.999812	0.127294	16.0443
GOTERM_BP_FAT	GO:0045619~regulation of lymphocyte differentiation	3	5.88235	0.0119911	ENSMUSG00000036594, ENSMUSG00000024610, ENSMUSG00000026395	40	58	13588	17.5707	0.999877	0.131177	16.7628
GOTERM_BP_FAT	GO:0002706~regulation of lymphocyte mediated immunity	3	5.88235	0.0148998	ENSMUSG00000059498, ENSMUSG00000078452, ENSMUSG00000026395	40	65	13588	15.6785	0.999986	0.158266	20.4129
GOTERM_BP_FAT	GO:0050870~positive regulation of T cell activation	3	5.88235	0.0153379	ENSMUSG00000036594, ENSMUSG00000024610, ENSMUSG00000026395	40	66	13588	15.4409	0.99999	0.160298	20.9494
GOTERM_BP_FAT	GO:0055080~cation homeostasis	4	7.84314	0.0156171	ENSMUSG00000026177, ENSMUSG00000026395, ENSMUSG00000031129, ENSMUSG00000007655	40	184	13588	7.38478	0.999992	0.16076	21.2897
GOTERM_BP_FAT	GO:0009611~response to wounding	5	9.80392	0.0170135	ENSMUSG00000036887, ENSMUSG00000059498, ENSMUSG00000026177, ENSMUSG00000079227, ENSMUSG00000036896	40	347	13588	4.89481	0.999997	0.171595	22.9708
GOTERM_BP_FAT	GO:0002703~regulation of leukocyte mediated immunity	3	5.88235	0.0171449	ENSMUSG00000059498, ENSMUSG00000078452, ENSMUSG00000026395	40	70	13588	14.5586	0.999998	0.170532	23.1273
GOTERM_BP_FAT	GO:0002437~inflammatory response to antigenic stimulus	2	3.92157	0.0199234	ENSMUSG00000059498, ENSMUSG00000079227	40	7	13588	97.0571	1	0.193032	26.367
GOTERM_BP_FAT	GO:0002683~negative regulation of immune system process	3	5.88235	0.0200164	ENSMUSG00000044206, ENSMUSG00000024610, ENSMUSG00000026395	40	76	13588	13.4092	1	0.191397	26.4731
GOTERM_BP_FAT	GO:0048878~chemical homeostasis	5	9.80392	0.0200951	ENSMUSG00000030409, ENSMUSG00000026177, ENSMUSG00000026395, ENSMUSG00000031129, ENSMUSG00000007655	40	365	13588	4.65342	1	0.189682	26.5629
GOTERM_BP_FAT	GO:0002526~acute inflammatory response	3	5.88235	0.0225524	ENSMUSG00000036887, ENSMUSG00000059498, ENSMUSG00000036896	40	81	13588	12.5815	1	0.20793	29.3144
GOTERM_BP_FAT	GO:0045059~positive thymic T cell selection	2	3.92157	0.0227379	ENSMUSG00000024610, ENSMUSG00000026395	40	8	13588	84.925	1	0.20695	29.5181
GOTERM_BP_FAT	GO:0050732~negative regulation of peptidyl-tyrosine phosphorylation	2	3.92157	0.0227379	ENSMUSG00000026395, ENSMUSG00000007655	40	8	13588	84.925	1	0.20695	29.5181
GOTERM_BP_FAT	GO:0060627~regulation of vesicle-mediated transport	3	5.88235	0.0236023	ENSMUSG00000059498, ENSMUSG00000026177, ENSMUSG00000076617	40	83	13588	12.2783	1	0.211465	30.4603
GOTERM_BP_FAT	GO:0045321~leukocyte activation	4	7.84314	0.0246535	ENSMUSG00000059498, ENSMUSG00000026177, ENSMUSG00000024610, ENSMUSG00000026395	40	219	13588	6.20457	1	0.217316	31.5903
GOTERM_BP_FAT	GO:0045060~negative thymic T cell selection	2	3.92157	0.0255445	ENSMUSG00000024610, ENSMUSG00000026395	40	9	13588	75.4889	1	0.221743	32.5346
GOTERM_BP_FAT	GO:0001959~regulation of cytokine-mediated signaling pathway	2	3.92157	0.0255445	ENSMUSG00000026395, ENSMUSG00000007655	40	9	13588	75.4889	1	0.221743	32.5346
GOTERM_BP_FAT	GO:0002697~regulation of immune effector process	3	5.88235	0.0263134	ENSMUSG00000059498, ENSMUSG00000078452, ENSMUSG00000026395	40	88	13588	11.5807	1	0.22511	33.3397
GOTERM_BP_FAT	GO:0050829~defense response to Gram-negative bacterium	2	3.92157	0.0283432	ENSMUSG00000026177, ENSMUSG00000069516	40	10	13588	67.94	1	0.237774	35.4222
GOTERM_BP_FAT	GO:0043383~negative T cell selection	2	3.92157	0.0283432	ENSMUSG00000024610, ENSMUSG00000026395	40	10	13588	67.94	1	0.237774	35.4222
GOTERM_BP_FAT	GO:0043368~positive T cell selection	2	3.92157	0.0283432	ENSMUSG00000024610, ENSMUSG00000026395	40	10	13588	67.94	1	0.237774	35.4222
GOTERM_BP_FAT	GO:0043408~regulation of MAPKKK cascade	3	5.88235	0.0291448	ENSMUSG00000026395, ENSMUSG00000076617, ENSMUSG00000007655	40	93	13588	10.9581	1	0.241046	36.2278
GOTERM_BP_FAT	GO:0001775~cell activation	4	7.84314	0.0331996	ENSMUSG00000059498, ENSMUSG00000026177, ENSMUSG00000024610, ENSMUSG00000026395	40	246	13588	5.52358	1	0.267253	40.1607
GOTERM_BP_FAT	GO:0051241~negative regulation of multicellular organismal process	3	5.88235	0.0333038	ENSMUSG00000044206, ENSMUSG00000026177, ENSMUSG00000021190	40	100	13588	10.191	1	0.26519	40.2587
GOTERM_BP_FAT	GO:0045087~innate immune response	3	5.88235	0.0376811	ENSMUSG00000036887, ENSMUSG00000026177, ENSMUSG00000036896	40	107	13588	9.5243	1	0.291937	44.2432
GOTERM_BP_FAT	GO:0042742~defense response to bacterium	3	5.88235	0.0383237	ENSMUSG00000026177, ENSMUSG00000079227, ENSMUSG00000069516	40	108	13588	9.43611	1	0.293226	44.8068
GOTERM_BP_FAT	GO:0006873~cellular ion homeostasis	4	7.84314	0.0385366	ENSMUSG00000030409, ENSMUSG00000026177, ENSMUSG00000026395, ENSMUSG00000007655	40	261	13588	5.20613	1	0.291712	44.9923
GOTERM_BP_FAT	GO:0002714~positive regulation of B cell mediated immunity	2	3.92157	0.0394599	ENSMUSG00000059498, ENSMUSG00000026395	40	14	13588	48.5286	1	0.294768	45.7903
GOTERM_BP_FAT	GO:0050853~B cell receptor signaling pathway	2	3.92157	0.0394599	ENSMUSG00000026395, ENSMUSG00000076617	40	14	13588	48.5286	1	0.294768	45.7903
GOTERM_BP_FAT	GO:0002891~positive regulation of immunoglobulin mediated immune response	2	3.92157	0.0394599	ENSMUSG00000059498, ENSMUSG00000026395	40	14	13588	48.5286	1	0.294768	45.7903
GOTERM_BP_FAT	GO:0055082~cellular chemical homeostasis	4	7.84314	0.0411694	ENSMUSG00000030409, ENSMUSG00000026177, ENSMUSG00000026395, ENSMUSG00000007655	40	268	13588	5.07015	1	0.302665	47.2393
GOTERM_BP_FAT	GO:0045061~thymic T cell selection	2	3.92157	0.0422197	ENSMUSG00000024610, ENSMUSG00000026395	40	15	13588	45.2933	1	0.306277	48.1114
GOTERM_BP_FAT	GO:0042110~T cell activation	3	5.88235	0.043614	ENSMUSG00000026177, ENSMUSG00000024610, ENSMUSG00000026395	40	116	13588	8.78534	1	0.311875	49.2485
GOTERM_BP_FAT	GO:0002495~antigen processing and presentation of peptide antigen via MHC class II	2	3.92157	0.0449717	ENSMUSG00000036594, ENSMUSG00000024610	40	16	13588	42.4625	1	0.317101	50.3333
GOTERM_BP_FAT	GO:0019886~antigen processing and presentation of exogenous peptide antigen via MHC class II	2	3.92157	0.0449717	ENSMUSG00000036594, ENSMUSG00000024610	40	16	13588	42.4625	1	0.317101	50.3333
GOTERM_BP_FAT	GO:0001932~regulation of protein amino acid phosphorylation	3	5.88235	0.0470515	ENSMUSG00000026395, ENSMUSG00000076617, ENSMUSG00000007655	40	121	13588	8.42231	1	0.326379	51.953
GOTERM_BP_FAT	GO:0032729~positive regulation of interferon-gamma production	2	3.92157	0.0477161	ENSMUSG00000026177, ENSMUSG00000078452	40	17	13588	39.9647	1	0.327297	52.4602
GOTERM_BP_FAT	GO:0045428~regulation of nitric oxide biosynthetic process	2	3.92157	0.0531817	ENSMUSG00000078452, ENSMUSG00000007655	40	19	13588	35.7579	1	0.354906	56.445
GOTERM_BP_FAT	GO:0002504~antigen processing and presentation of peptide or polysaccharide antigen via MHC class II	2	3.92157	0.0531817	ENSMUSG00000036594, ENSMUSG00000024610	40	19	13588	35.7579	1	0.354906	56.445
GOTERM_BP_FAT	GO:0030005~cellular di-, tri-valent inorganic cation homeostasis	3	5.88235	0.0564332	ENSMUSG00000026177, ENSMUSG00000026395, ENSMUSG00000007655	40	134	13588	7.60522	1	0.369346	58.6652
GOTERM_BP_FAT	GO:0045058~T cell selection	2	3.92157	0.0586168	ENSMUSG00000024610, ENSMUSG00000026395	40	21	13588	32.3524	1	0.377703	60.0964
GOTERM_BP_FAT	GO:0031343~positive regulation of cell killing	2	3.92157	0.0640214	ENSMUSG00000078452, ENSMUSG00000026395	40	23	13588	29.5391	1	0.401985	63.4421
GOTERM_BP_FAT	GO:0050766~positive regulation of phagocytosis	2	3.92157	0.0640214	ENSMUSG00000059498, ENSMUSG00000026177	40	23	13588	29.5391	1	0.401985	63.4421
GOTERM_BP_FAT	GO:0001933~negative regulation of protein amino acid phosphorylation	2	3.92157	0.0640214	ENSMUSG00000026395, ENSMUSG00000007655	40	23	13588	29.5391	1	0.401985	63.4421
GOTERM_BP_FAT	GO:0001912~positive regulation of leukocyte mediated cytotoxicity	2	3.92157	0.0640214	ENSMUSG00000078452, ENSMUSG00000026395	40	23	13588	29.5391	1	0.401985	63.4421
GOTERM_BP_FAT	GO:0055066~di-, tri-valent inorganic cation homeostasis	3	5.88235	0.0656244	ENSMUSG00000026177, ENSMUSG00000026395, ENSMUSG00000007655	40	146	13588	6.98014	1	0.40668	64.3828
GOTERM_BP_FAT	GO:0001818~negative regulation of cytokine production	2	3.92157	0.0667124	ENSMUSG00000044206, ENSMUSG00000026177	40	24	13588	28.3083	1	0.408778	65.0084
GOTERM_BP_FAT	GO:0042127~regulation of cell proliferation	5	9.80392	0.0671485	ENSMUSG00000044206, ENSMUSG00000029084, ENSMUSG00000026395, ENSMUSG00000076617, ENSMUSG00000007655	40	538	13588	3.15706	1	0.407721	65.2563
GOTERM_BP_FAT	GO:0050764~regulation of phagocytosis	2	3.92157	0.0693959	ENSMUSG00000059498, ENSMUSG00000026177	40	25	13588	27.176	1	0.415228	66.5077
GOTERM_BP_FAT	GO:0030003~cellular cation homeostasis	3	5.88235	0.0703973	ENSMUSG00000026177, ENSMUSG00000026395, ENSMUSG00000007655	40	152	13588	6.70461	1	0.41677	67.0517
GOTERM_BP_FAT	GO:0010627~regulation of protein kinase cascade	3	5.88235	0.0728258	ENSMUSG00000026395, ENSMUSG00000076617, ENSMUSG00000007655	40	155	13588	6.57484	1	0.424789	68.3368
GOTERM_BP_FAT	GO:0009617~response to bacterium	3	5.88235	0.07446	ENSMUSG00000026177, ENSMUSG00000079227, ENSMUSG00000069516	40	157	13588	6.49108	1	0.429035	69.1751
GOTERM_BP_FAT	GO:0042326~negative regulation of phosphorylation	2	3.92157	0.0747402	ENSMUSG00000026395, ENSMUSG00000007655	40	27	13588	25.163	1	0.427195	69.3167
GOTERM_BP_FAT	GO:0019725~cellular homeostasis	4	7.84314	0.0748253	ENSMUSG00000030409, ENSMUSG00000026177, ENSMUSG00000026395, ENSMUSG00000007655	40	343	13588	3.96152	1	0.424523	69.3596
GOTERM_BP_FAT	GO:0042098~T cell proliferation	2	3.92157	0.0774012	ENSMUSG00000026177, ENSMUSG00000026395	40	28	13588	24.2643	1	0.432756	70.6317
GOTERM_BP_FAT	GO:0015674~di-, tri-valent inorganic cation transport	3	5.88235	0.0777639	ENSMUSG00000026177, ENSMUSG00000026395, ENSMUSG00000007655	40	161	13588	6.32981	1	0.431304	70.8068
GOTERM_BP_FAT	GO:0051240~positive regulation of multicellular organismal process	3	5.88235	0.0794333	ENSMUSG00000026177, ENSMUSG00000078452, ENSMUSG00000007655	40	163	13588	6.25215	1	0.435434	71.6003
GOTERM_BP_FAT	GO:0045936~negative regulation of phosphate metabolic process	2	3.92157	0.0800547	ENSMUSG00000026395, ENSMUSG00000007655	40	29	13588	23.4276	1	0.435081	71.8904
GOTERM_BP_FAT	GO:0010563~negative regulation of phosphorus metabolic process	2	3.92157	0.0800547	ENSMUSG00000026395, ENSMUSG00000007655	40	29	13588	23.4276	1	0.435081	71.8904
GOTERM_BP_FAT	GO:0031399~regulation of protein modification process	3	5.88235	0.081114	ENSMUSG00000026395, ENSMUSG00000076617, ENSMUSG00000007655	40	165	13588	6.17636	1	0.436561	72.3787
GOTERM_BP_FAT	GO:0031341~regulation of cell killing	2	3.92157	0.0827007	ENSMUSG00000078452, ENSMUSG00000026395	40	30	13588	22.6467	1	0.440181	73.0953
GOTERM_BP_FAT	GO:0002889~regulation of immunoglobulin mediated immune response	2	3.92157	0.0827007	ENSMUSG00000059498, ENSMUSG00000026395	40	30	13588	22.6467	1	0.440181	73.0953
GOTERM_BP_FAT	GO:0001910~regulation of leukocyte mediated cytotoxicity	2	3.92157	0.0827007	ENSMUSG00000078452, ENSMUSG00000026395	40	30	13588	22.6467	1	0.440181	73.0953
GOTERM_BP_FAT	GO:0002712~regulation of B cell mediated immunity	2	3.92157	0.0827007	ENSMUSG00000059498, ENSMUSG00000026395	40	30	13588	22.6467	1	0.440181	73.0953
GOTERM_BP_FAT	GO:0006958~complement activation, classical pathway	2	3.92157	0.0827007	ENSMUSG00000036887, ENSMUSG00000036896	40	30	13588	22.6467	1	0.440181	73.0953
GOTERM_BP_FAT	GO:0042592~homeostatic process	5	9.80392	0.0850551	ENSMUSG00000030409, ENSMUSG00000026177, ENSMUSG00000026395, ENSMUSG00000031129, ENSMUSG00000007655	40	584	13588	2.90839	1	0.446825	74.1266
GOTERM_BP_FAT	GO:0006885~regulation of pH	2	3.92157	0.0853393	ENSMUSG00000026177, ENSMUSG00000031129	40	31	13588	21.9161	1	0.445058	74.2486
GOTERM_BP_FAT	GO:0009968~negative regulation of signal transduction	3	5.88235	0.0862227	ENSMUSG00000030844, ENSMUSG00000026395, ENSMUSG00000007655	40	171	13588	5.95965	1	0.4457	74.6243
GOTERM_BP_FAT	GO:0009967~positive regulation of signal transduction	3	5.88235	0.0870836	ENSMUSG00000064330, ENSMUSG00000026395, ENSMUSG00000076617	40	172	13588	5.925	1	0.446245	74.9855
GOTERM_BP_FAT	GO:0043933~macromolecular complex subunit organization	4	7.84314	0.0875665	ENSMUSG00000058672, ENSMUSG00000024030, ENSMUSG00000024610, ENSMUSG00000007655	40	367	13588	3.70245	1	0.445307	75.1859
GOTERM_BP_FAT	GO:0032649~regulation of interferon-gamma production	2	3.92157	0.0879706	ENSMUSG00000026177, ENSMUSG00000078452	40	32	13588	21.2312	1	0.444078	75.3526
GOTERM_BP_FAT	GO:0033077~T cell differentiation in the thymus	2	3.92157	0.0879706	ENSMUSG00000024610, ENSMUSG00000026395	40	32	13588	21.2312	1	0.444078	75.3526
GOTERM_BP_FAT	GO:0045597~positive regulation of cell differentiation	3	5.88235	0.0896821	ENSMUSG00000036594, ENSMUSG00000024610, ENSMUSG00000026395	40	175	13588	5.82343	1	0.447901	76.0467
GOTERM_BP_FAT	GO:0002274~myeloid leukocyte activation	2	3.92157	0.0958201	ENSMUSG00000059498, ENSMUSG00000026177	40	35	13588	19.4114	1	0.468179	78.3889
GOTERM_BP_FAT	GO:0045596~negative regulation of cell differentiation	3	5.88235	0.0958348	ENSMUSG00000024030, ENSMUSG00000024610, ENSMUSG00000007655	40	182	13588	5.59945	1	0.465427	78.3942
GOTERM_BP_FAT	GO:0050851~antigen receptor-mediated signaling pathway	2	3.92157	0.098422	ENSMUSG00000026395, ENSMUSG00000076617	40	36	13588	18.8722	1	0.472063	79.3156
GOTERM_BP_FAT	GO:0051899~membrane depolarization	2	3.92157	0.098422	ENSMUSG00000030409, ENSMUSG00000007655	40	36	13588	18.8722	1	0.472063	79.3156
GOTERM_BP_FAT	GO:0002541~activation of plasma proteins involved in acute inflammatory response	2	3.92157	0.098422	ENSMUSG00000036887, ENSMUSG00000036896	40	36	13588	18.8722	1	0.472063	79.3156
GOTERM_BP_FAT	GO:0006641~triglyceride metabolic process	2	3.92157	0.098422	ENSMUSG00000027513, ENSMUSG00000007655	40	36	13588	18.8722	1	0.472063	79.3156
GOTERM_BP_FAT	GO:0006956~complement activation	2	3.92157	0.098422	ENSMUSG00000036887, ENSMUSG00000036896	40	36	13588	18.8722	1	0.472063	79.3156
GOTERM_BP_FAT	GO:0010648~negative regulation of cell communication	3	5.88235	0.0994047	ENSMUSG00000030844, ENSMUSG00000026395, ENSMUSG00000007655	40	186	13588	5.47903	1	0.472818	79.6559
