# Supplementary material for: Sustained activation of detoxification pathways promotes liver carcinogenesis in response to chronic bile acid-mediated damage
Source: PLoS Genet. 2018 May 7;14(5):e1007380. doi: 10.1371/journal.pgen.1007380 (PMC5957449; doi:10.1371/journal.pgen.1007380)
Supplement: S7 Table — (XLSX) [file pgen.1007380.s014.xlsx]

## Sheet: Cluster1
MATRIX_ID	Z_SCORE	P_VALUE	SAMPLE_AVERAGE	BACKGROUND_AVERAGE	SAMPLE_STDDEV	BACKGROUND_STDDEV	P_WELCH	df_WELCH
TFDP1_HUMAN.H10MO.D	15.996	1.79076e-59	0.851915	0.834287	0.0544016	0.0596494	1.91719e-65	3263.55
MA0163.1 PLAG1	15.9253	4.24024e-59	0.841534	0.829495	0.0388132	0.0408738	1.60757e-60	3243.69
MAZ_HUMAN.H10MO.A	15.4749	1.0008e-55	0.834063	0.815008	0.0593482	0.0666971	3.07177e-64	3276.51
AJ_TFAP2C::E2F8	14.9774	2.11844e-52	0.815763	0.80295	0.0422355	0.0463083	6.22581e-58	3263.53
MA0516.1 SP2	14.8959	9.0743e-52	0.904906	0.89151	0.0430323	0.0487201	1.24689e-60	3280.54
SP1_HUMAN.H10MO.C	14.8692	1.32652e-51	0.856827	0.840399	0.0531242	0.0598488	6.50944e-60	3277.84
SP3_HUMAN.H10MO.B	14.783	4.8379e-51	0.852867	0.836158	0.0545617	0.0612187	7.4545e-59	3275.64
PLAL1_HUMAN.H10MO.D	14.7355	6.14834e-51	0.900559	0.890201	0.0365271	0.0379906	2.73163e-51	3237.9
ZN148_HUMAN.H10MO.D	14.6552	3.31438e-50	0.89933	0.883086	0.0536549	0.0600306	1.24912e-57	3274.12
E2F6_HUMAN.H10MO.C	14.6199	4.19421e-50	0.90863	0.897601	0.0382812	0.0408018	9.68163e-53	3249.44
MA0079.3 SP1	14.5382	2.69244e-49	0.944249	0.932034	0.0383112	0.0455768	3.73675e-63	3309.13
SP1_HUMAN.H10MO.S	14.4169	1.40787e-48	0.91808	0.902886	0.0494578	0.0571243	4.45543e-59	3291.72
MA0469.1 E2F3	14.2922	5.18412e-48	0.881062	0.867709	0.0480379	0.0505129	2.13266e-49	3242.99
BU0101 Zic1_primary	14.2462	1.08097e-47	0.800149	0.786842	0.0476222	0.0505152	7.47279e-50	3247.13
BU0010 Egr1_primary	14.2279	1.34698e-47	0.855221	0.841743	0.0486697	0.0512177	4.70857e-49	3243.36
BU0103 Zic3_primary	14.2153	1.42608e-47	0.790058	0.777638	0.0457701	0.0472074	2.7046e-47	3234.08
MA0599.1 KLF5	14.2654	1.44079e-47	0.963753	0.952801	0.0354438	0.0416312	1.21427e-59	3301.48
BU0102 Zic2_primary	14.1598	3.17589e-47	0.786936	0.774399	0.0464996	0.0478362	9.63102e-47	3232.92
MA0024.2 E2F1	14.0803	9.92718e-47	0.920775	0.908179	0.0471511	0.0483265	5.82512e-46	3231.26
KLF6_HUMAN.H10MO.D	14.0997	1.27567e-46	0.972098	0.96394	0.0279403	0.0313403	6.95517e-54	3275.49
SP2_HUMAN.H10MO.C	14.0957	1.28629e-46	0.831945	0.815681	0.0562104	0.0624817	5.13393e-53	3270.66
BU0052 Plagl1_primary	14.0214	2.25088e-46	0.844252	0.831794	0.047116	0.0479921	4.05778e-45	3228.51
KLF1_HUMAN.H10MO.C	14.0139	3.05344e-46	0.908169	0.896683	0.0421695	0.0443111	1.42757e-47	3242.66
MA0003.1 TFAP2A	14.0335	3.97261e-46	0.972534	0.964534	0.0266353	0.0309015	1.23817e-56	3294.27
MA0470.1 E2F4	13.9879	4.07008e-46	0.90319	0.889697	0.05033	0.0521265	3.10653e-46	3235.97
SP4_HUMAN.H10MO.D	14.0152	4.63133e-46	0.801798	0.783389	0.0626914	0.0711649	2.11056e-54	3281.99
MA0079.2 SP1	14.008	6.30558e-46	0.955913	0.944799	0.0363895	0.0430327	2.41289e-58	3305.52
GN_KLF5_TOP5000	13.9387	1.52336e-45	0.953691	0.944675	0.0303562	0.0350607	1.71167e-55	3291.7
WT1_HUMAN.H10MO.D	13.7811	1.19616e-44	0.893971	0.88066	0.0470239	0.0523029	6.7362e-51	3270.99
MA0003.3 TFAP2A	13.7449	1.69328e-44	0.912093	0.90162	0.038228	0.0412253	5.24858e-48	3255.17
TA0323_TFAP2A_DBD_dimer	13.7392	1.83226e-44	0.91202	0.901554	0.0382302	0.0412164	6.01446e-48	3255.04
TBX1_HUMAN.H10MO.D	13.6162	1.20638e-43	0.811464	0.79795	0.0485146	0.0537357	2.04753e-49	3268.79
EGR1_HUMAN.H10MO.A	13.5763	1.95086e-43	0.881314	0.870173	0.0407173	0.044412	7.4312e-48	3260.88
TBX15_HUMAN.H10MO.D	13.5736	2.16619e-43	0.825889	0.808798	0.0616959	0.06817	6.36006e-49	3267.52
MA0471.1 E2F6	13.5532	2.40517e-43	0.93249	0.92188	0.0396506	0.042342	5.52248e-46	3250.36
AJ_TFAP2C::HES7_002	13.4944	4.54282e-43	0.793484	0.782969	0.0407578	0.0421071	4.50732e-43	3234.83
TA0324_TFAP2A_DBD_dimer	13.4422	1.1889e-42	0.885431	0.872805	0.0471802	0.0508175	5.72587e-46	3254.57
KLF13_HUMAN.H10MO.D	13.434	1.21288e-42	0.912423	0.898066	0.0545953	0.0577917	1.48398e-44	3246.14
AJ_GCM1::FIGLA_002	13.3651	2.09021e-42	0.817711	0.80841	0.0380541	0.0375491	4.43481e-39	3214.97
MA0162.2 EGR1	13.3888	2.34089e-42	0.905865	0.89392	0.0453296	0.0482535	1.03633e-44	3248.83
BU0076 Sp4_primary	13.3438	4.75758e-42	0.874674	0.86189	0.0479185	0.0518408	1.07416e-45	3256.76
TA0334_Tcfap2a_DBD_dimer	13.345	4.99152e-42	0.898475	0.88849	0.0369624	0.0405016	1.00104e-46	3263.21
TA0322_TFAP2A_DBD_dimer	13.2717	1.43684e-41	0.908708	0.899138	0.0352891	0.0390424	4.96927e-47	3268.2
MA0810.1 TFAP2A.var.2	13.2692	1.48541e-41	0.90863	0.899051	0.035333	0.0390855	5.29556e-47	3268.12
PURA_HUMAN.H10MO.D	13.2557	1.60326e-41	0.910569	0.903449	0.026854	0.0290666	3.5412e-45	3257.01
PROX1_HUMAN.H10MO.D	13.244	1.75635e-41	0.874383	0.866145	0.0314987	0.0336445	4.44923e-44	3250.48
KLF4_HUMAN.H10MO.A	13.1822	5.3878e-41	0.954949	0.943922	0.0401197	0.0453156	3.84505e-48	3279.25
HU0034_ZNF692	13.1245	6.73514e-41	0.853266	0.841601	0.0473587	0.0479934	1.4216e-39	3226.27
AJ_ETV5::HES7_002	13.1365	6.96393e-41	0.828063	0.817975	0.0395451	0.0415171	3.85012e-42	3242.25
KLF16_HUMAN.H10MO.D	13.1363	8.54583e-41	0.842136	0.826591	0.0586504	0.0640446	4.13001e-45	3261.45
KLF15_HUMAN.H10MO.D	13.099	1.44514e-40	0.907717	0.899171	0.0322198	0.0353153	3.63859e-45	3263.36
TA0335_Tcfap2a_DBD_dimer	13.0895	1.52023e-40	0.909883	0.899528	0.0396613	0.0427999	6.63959e-44	3255.51
TA0330_TFAP2C_DBD_dimer	13.0676	1.69099e-40	0.853198	0.841295	0.0473117	0.0492271	4.3314e-41	3238.08
MA0815.1 TFAP2C.var.3	13.0653	1.7438e-40	0.853222	0.841326	0.0472978	0.04921	4.50728e-41	3238.06
TA0326_TFAP2B_DBD_dimer	13.059	2.20545e-40	0.896685	0.885826	0.04203	0.0449833	4.28668e-43	3251.45
MA0812.1 TFAP2B.var.2	13.0472	2.58381e-40	0.896554	0.885697	0.0420631	0.0450119	5.19193e-43	3251.38
HU0017_KLF10	13.0184	4.68971e-40	0.943658	0.931959	0.043577	0.0486678	3.97549e-46	3273.16
HU0012_KLF14	13.0131	5.03223e-40	0.943578	0.931871	0.0436344	0.0487185	4.53474e-46	3273.01
MA0039.2 Klf4	13.0128	5.05166e-40	0.943581	0.931875	0.0436332	0.0487174	4.54949e-46	3273.02
AJ_E2F3::FOXI1	12.9761	5.74421e-40	0.789172	0.779104	0.0404086	0.041934	2.24757e-40	3236.87
MA0872.1 TFAP2A.var.3	12.9625	7.04224e-40	0.848972	0.83693	0.0481878	0.0502081	1.40827e-40	3238.72
TA0864_TFAP2A_DBD_dimer	12.9587	7.41991e-40	0.848954	0.836912	0.0481994	0.0502262	1.45373e-40	3238.77
TA0331_TFAP2C_full_dimer	12.964	7.94281e-40	0.896815	0.888225	0.0334745	0.0358403	1.52137e-42	3251.64
TA0863_TFAP2A_DBD_dimer	12.9266	1.36117e-39	0.893474	0.884014	0.036703	0.0395972	7.03391e-43	3255.38
TA0325_TFAP2B_DBD_dimer	12.9237	1.44727e-39	0.89591	0.886698	0.0355911	0.0385717	3.3757e-43	3257.63
MA0811.1 TFAP2B	12.9224	1.47021e-39	0.895808	0.886592	0.0356246	0.0385929	3.67941e-43	3257.44
PAX5_HUMAN.H10MO.A	12.8448	2.36566e-39	0.822987	0.81629	0.0288129	0.0281187	1.23747e-35	3210.47
EGR1_HUMAN.H10MO.S	12.836	3.8306e-39	0.892682	0.879402	0.0536608	0.0559192	7.36295e-40	3238.79
AJ_TFAP2C::ELK1	12.8325	4.55554e-39	0.792588	0.782824	0.0385172	0.0411566	1.32458e-41	3250.66
BU0097 Zfp281_primary	12.8078	6.91299e-39	0.876625	0.861651	0.0581376	0.0632748	8.4878e-43	3259.77
MA0697.1 ZIC3	12.732	1.56615e-38	0.819642	0.810406	0.037413	0.0392142	1.16473e-39	3241.48
TA0336_Tcfap2a_DBD_dimer	12.7317	1.60029e-38	0.85786	0.846375	0.0463765	0.048769	6.96058e-40	3243.02
TA0071_ZIC3_full_monomer	12.7245	1.73044e-38	0.819688	0.810458	0.0374105	0.0392151	1.26864e-39	3241.52
PLAG1_HUMAN.H10MO.D	12.7116	2.0128e-38	0.878488	0.870252	0.0335339	0.0350182	2.732e-39	3239.76
TA0328_TFAP2C_DBD_dimer	12.72	2.1273e-38	0.89179	0.882711	0.0357553	0.0386177	1.06432e-41	3255.93
MA0524.2 TFAP2C	12.701	2.72821e-38	0.891919	0.882866	0.0357186	0.0385688	1.44375e-41	3255.81
AJ_GCM1::ETV1	12.6511	4.79963e-38	0.849956	0.841058	0.0358891	0.0380328	6.00697e-40	3246.67
HU0006_CTCF	12.4732	3.68206e-37	0.812399	0.800916	0.0495751	0.0496972	2.3419e-35	3221.6
MBD2_HUMAN.H10MO.B	12.3955	1.36348e-36	0.900166	0.886559	0.0556786	0.0593748	6.89212e-39	3249.68
TA0327_TFAP2B_DBD_dimer	12.3778	1.51854e-36	0.860238	0.849435	0.0453679	0.0471688	4.00465e-37	3237.73
MA0813.1 TFAP2B.var.3	12.3758	1.55767e-36	0.860187	0.849384	0.0453768	0.0471781	4.10602e-37	3237.73
AJ_GCM1::ERG	12.3753	1.59351e-36	0.840628	0.832134	0.0355646	0.0370987	2.53689e-37	3239.25
TA0862_TFAP2A_DBD_dimer	12.3783	1.73694e-36	0.89952	0.889564	0.0406095	0.0435078	4.20665e-39	3251.95
TA0048_HINFP1_full_dimer	12.3666	2.10234e-36	0.712011	0.700305	0.0473888	0.0512215	1.23572e-39	3256.31
AJ_GCM1::ELK3_002	12.3272	2.92721e-36	0.78659	0.777319	0.039035	0.0406508	5.99812e-37	3238.48
TA0329_TFAP2C_DBD_dimer	12.3134	3.82387e-36	0.901495	0.891935	0.0395526	0.0419866	4.11362e-38	3247.49
MA0814.1 TFAP2C.var.2	12.313	3.838e-36	0.901298	0.891723	0.0396162	0.0420504	4.18653e-38	3247.45
AJ_GCM1::ELF1_001	12.2886	4.4592e-36	0.839749	0.831604	0.0349029	0.0358047	8.57405e-36	3231.65
SPIC_HUMAN.H10MO.D	12.2648	6.20176e-36	0.94893	0.943815	0.0218456	0.022536	5.17323e-36	3234.17
AJ_GCM1::ETV7_001	12.214	1.23971e-35	0.79167	0.784374	0.0309975	0.0322866	2.45487e-36	3238.57
THAP1_HUMAN.H10MO.D	12.2152	1.3956e-35	0.782347	0.771927	0.0430183	0.0461439	3.09843e-38	3252.54
ZFX_HUMAN.H10MO.C	12.1757	2.57809e-35	0.85636	0.845102	0.0454492	0.0500583	8.74614e-40	3265.86
AJ_GCM1::FIGLA_005	12.149	2.73812e-35	0.816662	0.808144	0.0366049	0.0378894	1.3554e-35	3235.7
HU0013_ZNF467	12.1329	3.92303e-35	0.86281	0.85191	0.0453583	0.0485989	1.09477e-37	3251.99
TA0047_HINFP1_full_dimer	12.1167	4.52783e-35	0.701795	0.690594	0.0472945	0.0499868	1.01699e-36	3245.41
ELF2_HUMAN.H10MO.C	12.0876	6.01958e-35	0.887011	0.879182	0.0337001	0.0350002	1.80866e-35	3237.24
AJ_TFAP2C::MAX_003	12.085	6.59227e-35	0.770821	0.762306	0.036221	0.0380959	3.10398e-36	3243.1
TA0072_ZIC4_DBD_monomer	12.0021	1.82347e-34	0.839331	0.831164	0.0351172	0.0367876	1.564e-35	3241.22
MA0751.1 ZIC4	11.9971	1.94305e-34	0.839385	0.831227	0.0350856	0.0367625	1.61584e-35	3241.33
MA0116.1 Znf423	11.9584	2.55476e-34	0.872383	0.8642	0.0368558	0.0369364	1.05685e-32	3221.48
ZIC4_HUMAN.H10MO.D	11.933	4.07998e-34	0.808166	0.798993	0.040131	0.0415409	1.93518e-34	3235.72
AP2B_HUMAN.H10MO.B	11.9197	6.29103e-34	0.937233	0.929304	0.03267	0.036013	2.62118e-38	3266.3
ASCL2_HUMAN.H10MO.D	11.859	1.29517e-33	0.922721	0.916097	0.0275972	0.0302349	1.50647e-37	3263.13
AJ_GCM1::FIGLA::010	11.8332	1.4813e-33	0.821222	0.813172	0.0350674	0.0367743	1.11518e-34	3241.72
EGR2_HUMAN.H10MO.C	11.8408	1.54955e-33	0.909826	0.898507	0.0477264	0.051725	9.49053e-37	3257.65
TA0046_HINFP1_full_monomer	11.8101	2.11206e-33	0.851527	0.841222	0.0442487	0.0471907	1.42465e-35	3249.73
MA0131.2 HINFP	11.7983	2.44006e-33	0.851418	0.841118	0.044272	0.0472148	1.66008e-35	3249.72
ZIC1_HUMAN.H10MO.B	11.8118	2.65682e-33	0.955287	0.949677	0.0226475	0.0257333	1.07588e-39	3282.52
TA0087_Zic3_DBD_monomer	11.7754	2.98542e-33	0.809342	0.800691	0.037932	0.0397117	2.86839e-34	3240.94
TA0332_TFAP2C_full_dimer	11.7614	3.20073e-33	0.836127	0.823827	0.0552048	0.0564956	6.99249e-33	3230.59
AJ_GCM1::FIGLA_007	11.6806	7.53854e-33	0.775444	0.767707	0.0359242	0.0357485	6.08622e-31	3218.49
ZN219_HUMAN.H10MO.D	11.7154	7.59338e-33	0.899519	0.88938	0.0425971	0.0468512	5.81858e-37	3265.14
TA0070_ZIC1_full_monomer	11.5961	2.63426e-32	0.811062	0.80242	0.0384638	0.0402855	2.44108e-33	3241.13
AJ_ETV2::HES7_001	11.586	2.90458e-32	0.773025	0.764648	0.0375177	0.0390751	5.75437e-33	3238.54
MA0696.1 ZIC1	11.581	3.15976e-32	0.811066	0.80244	0.0384367	0.0402634	2.87207e-33	3241.21
TA0333_TFAP2C_full_dimer	11.5568	4.66747e-32	0.90993	0.90205	0.034363	0.0368859	1.4558e-34	3252.89
AJ_GCM1::SPDEF_005	11.3309	6.29528e-31	0.763181	0.755964	0.0327408	0.034438	3.47107e-32	3243.13
AJ_E2F1::NHLH1	11.3263	7.24893e-31	0.76551	0.756707	0.0390982	0.0420463	2.06872e-33	3253.8
GLIS2_HUMAN.H10MO.D	11.3166	7.507e-31	0.806558	0.797958	0.0389867	0.041087	3.22309e-32	3244.04
AJ_GCM1::ELK1_002	11.2805	9.46053e-31	0.825118	0.816718	0.0399724	0.0402021	1.4623e-29	3223
BU0085 Tcfap2a_primary	11.2682	1.42828e-30	0.886129	0.878999	0.0318466	0.034232	4.53174e-33	3253.57
MTF1_HUMAN.H10MO.C	11.2233	1.50564e-30	0.800468	0.793101	0.0368353	0.035384	4.4614e-27	3204.2
KAISO_HUMAN.H10MO.A	11.2392	1.70845e-30	0.795439	0.787646	0.0363068	0.0374649	1.10195e-30	3234.3
TA0081_ZNF740_full_monomer	11.247	1.99167e-30	0.888505	0.876133	0.0541422	0.0595485	2.77833e-34	3265.13
TF7L1_HUMAN.H10MO.D	11.2239	2.10611e-30	0.868902	0.863503	0.0250084	0.0260001	5.28497e-31	3237.71
BU0086 Tcfap2b_primary	11.2284	2.29011e-30	0.861199	0.853259	0.0355181	0.0382567	5.68825e-33	3254.58
TA0079_ZNF524_full_monomer	11.1914	2.35082e-30	0.807946	0.79934	0.0424993	0.0414742	1.13336e-27	3210.46
AJ_TFAP2C::HES7_001	11.2263	2.65175e-30	0.788264	0.779375	0.0384814	0.0428765	6.1365e-35	3271.92
MA0014.1 Pax5	11.1903	2.74418e-30	0.860727	0.855846	0.0233603	0.0235514	2.98703e-29	3224.04
ZN350_HUMAN.H10MO.C	11.1791	2.93762e-30	0.834065	0.828899	0.0250998	0.0249397	1.76433e-28	3217.86
TA0059_SP1_DBD_monomer	11.214	3.23855e-30	0.94651	0.937894	0.0367453	0.0416273	7.03807e-36	3280.87
BU0088 Tcfap2e_primary	11.1864	3.55282e-30	0.876705	0.868409	0.0377316	0.0401115	5.14347e-32	3248.18
ZN740_HUMAN.H10MO.D	11.0553	1.79025e-29	0.897433	0.886726	0.0479219	0.0524223	6.59993e-33	3262.35
BU0100 Zfp740_primary	11.0385	1.92963e-29	0.891507	0.880002	0.0532199	0.0563613	4.87529e-31	3246.36
MA0154.1 EBF1	11.0069	2.61415e-29	0.926048	0.918974	0.0333099	0.0347414	4.45489e-30	3239.18
GLIS3_HUMAN.H10MO.D	10.9868	3.25928e-29	0.91618	0.909151	0.0332322	0.0345768	7.4669e-30	3238.07
MA0162.1 Egr1	10.9725	3.95579e-29	0.886042	0.877674	0.0393182	0.0412289	3.50253e-30	3241.68
ARNT2_HUMAN.H10MO.D	10.9743	4.36504e-29	0.914497	0.908496	0.0273084	0.0295875	6.2032e-32	3257.5
TA0038_EGR4_DBD_monomer	10.93	7.04945e-29	0.816438	0.808473	0.0366389	0.0394258	2.5084e-31	3254.1
TA0033_EGR1_DBD_monomer	10.907	7.7992e-29	0.831701	0.822399	0.0447086	0.0460799	5.51948e-29	3233.76
MA0733.1 EGR4	10.9206	7.83852e-29	0.816235	0.808271	0.0366641	0.0394512	2.82472e-31	3254.08
MA0732.1 EGR3	10.8753	1.21308e-28	0.816944	0.807052	0.0466733	0.0491794	6.0864e-30	3243.96
TA0037_EGR3_DBD_monomer	10.8557	1.51251e-28	0.816746	0.806859	0.0467533	0.0492433	8.03026e-30	3243.77
AJ_TFAP2C::ETV7	10.8234	1.99161e-28	0.789854	0.783355	0.0315373	0.0324421	1.74089e-28	3232.9
AP2C_HUMAN.H10MO.A	10.8336	2.12835e-28	0.88479	0.876831	0.0367581	0.0397529	4.34312e-31	3256.59
BU0039 Klf7_primary	10.8031	3.16045e-28	0.880851	0.871771	0.0414216	0.045496	9.22362e-32	3264.44
ZIC2_HUMAN.H10MO.C	10.7753	3.79451e-28	0.91905	0.912116	0.0328782	0.0347969	1.15627e-29	3246.06
AJ_E2F3::HES7	10.7643	3.83425e-28	0.779414	0.769173	0.0500874	0.0513996	4.37767e-28	3231.81
MA0753.1 ZNF740	10.7621	4.7254e-28	0.900369	0.888914	0.0533035	0.0575878	1.16594e-30	3256.08
TA0080_ZNF740_DBD_monomer	10.7552	5.10313e-28	0.900251	0.88879	0.0533822	0.0576544	1.31788e-30	3255.92
AJ_E2F1::HES7_001	10.736	5.51263e-28	0.763984	0.754533	0.0457849	0.0475748	1.48928e-28	3237.47
ZBT7A_HUMAN.H10MO.D	10.7406	5.65481e-28	0.889346	0.884673	0.0221698	0.023531	1.23867e-29	3247.43
AJ_GCM1::SPDEF_002	10.7358	5.79072e-28	0.748031	0.740915	0.0340489	0.0358365	3.4764e-29	3243.43
BU0087 Tcfap2c_primary	10.7342	6.01268e-28	0.876359	0.869346	0.0333782	0.0353283	1.85041e-29	3246.09
MA0146.1 Zfx	10.7091	8.51025e-28	0.891468	0.881753	0.0454692	0.049083	2.43521e-30	3255.67
MA0146.2 Zfx	10.6786	1.19368e-27	0.891331	0.881614	0.0456023	0.0492338	3.44269e-30	3255.74
AJ_GCM1::ELK1_003	10.639	1.37095e-27	0.818327	0.810318	0.040868	0.0406241	4.87282e-26	3218.03
HU0024_ZNF574	10.5859	2.48866e-27	0.821524	0.81469	0.0349747	0.0348397	6.76981e-26	3218.92
AJ_ETV5::HES7_001	10.6036	2.60897e-27	0.823496	0.814962	0.0408864	0.0435311	4.24152e-29	3248.91
E2F3_HUMAN.H10MO.B	10.5972	2.6805e-27	0.895677	0.887345	0.0404259	0.0425072	1.87614e-28	3242.97
MA0524.1 TFAP2C	10.5972	3.16674e-27	0.887216	0.879796	0.0342869	0.0379099	5.20564e-31	3267.87
MNT_HUMAN.H10MO.D	10.5202	5.8007e-27	0.920808	0.915704	0.0254574	0.0262138	4.31847e-27	3233.34
MA0736.1 GLIS2	10.4275	1.69625e-26	0.821535	0.814277	0.0358875	0.0376278	1.71388e-27	3241.64
PLAG1_HUMAN.H10MO.S	10.4242	1.69827e-26	0.914597	0.909566	0.0251279	0.0260814	5.24647e-27	3236.96
AJ_ETV5::EOMES_001	10.408	1.75905e-26	0.790035	0.784728	0.0275747	0.0275232	3.39567e-25	3219.76
TA0086_Zfp740_DBD_monomer	10.4265	1.76831e-26	0.914087	0.904741	0.0458128	0.0484726	6.44688e-28	3245.92
TA0043_GLIS2_DBD_monomer	10.4213	1.81396e-26	0.821374	0.814119	0.035906	0.0376349	1.90415e-27	3241.48
AJ_ETV5::TCF3_001	10.371	2.73229e-26	0.822946	0.816347	0.0340614	0.0343572	1.74679e-25	3224.25
AJ_E2F3::TBX21_003	10.3629	2.92422e-26	0.781751	0.774927	0.0354375	0.0355527	3.24363e-25	3221.93
MA0528.1 ZNF263	10.3684	3.09367e-26	0.873488	0.865284	0.041253	0.0427614	1.10596e-26	3236.35
HU0025_ZNF16	10.2632	7.45267e-26	0.810254	0.80294	0.0397249	0.0384238	2.73572e-23	3206.91
TA0053_KLF16_DBD_monomer	10.2939	9.16418e-26	0.911487	0.902198	0.0430214	0.0488953	8.02999e-31	3282.65
MA0741.1 KLF16	10.2902	9.52531e-26	0.911347	0.902049	0.0430801	0.0489551	8.55575e-31	3282.58
ETV1_HUMAN.H10MO.B	10.2013	2.03902e-25	0.850455	0.843335	0.0353459	0.0377516	2.92472e-27	3250.45
AJ_GCM1::SPDEF_004	10.1552	2.95872e-25	0.770055	0.764169	0.0303927	0.0313166	1.96568e-25	3233.65
E2F1_HUMAN.H10MO.A	10.1624	3.13029e-25	0.87603	0.869615	0.0317973	0.0341508	2.49722e-27	3253.16
KLF14_HUMAN.H10MO.D	10.1628	3.67375e-25	0.866708	0.856596	0.0474454	0.053914	4.26263e-30	3282.56
HEN1_HUMAN.H10MO.C	10.1198	4.0446e-25	0.797318	0.79048	0.0360566	0.0364903	1.63879e-24	3225.68
SRBP2_HUMAN.H10MO.B	10.124	4.4091e-25	0.897798	0.891317	0.0328732	0.03461	3.09897e-26	3243.58
BU0008 E2F2_primary	10.1187	4.60212e-25	0.810965	0.800957	0.0509966	0.0534663	5.04595e-26	3241.61
CTCFL_HUMAN.H10MO.A	10.0837	5.57096e-25	0.813506	0.805507	0.0430417	0.042814	1.18766e-23	3218.32
ZN524_HUMAN.H10MO.D	10.0551	8.68781e-25	0.774058	0.767139	0.0358322	0.0371891	2.74724e-25	3236.93
TA0366_NHLH1_DBD_dimer	10.0448	1.07291e-24	0.88025	0.871908	0.0418728	0.0449247	1.0461e-26	3252.65
AJ_GCM1::FIGLA_004	10.0098	1.4901e-24	0.816787	0.809722	0.035998	0.038169	5.20103e-26	3246.94
TFAP4_HUMAN.H10MO.C	9.93615	3.03732e-24	0.895404	0.8872	0.0428146	0.0446306	6.23689e-25	3238.94
NFIC_HUMAN.H10MO.A	9.9074	3.12594e-24	0.855521	0.849181	0.0358378	0.0344964	1.12538e-21	3205
ZN639_HUMAN.H10MO.D	9.91495	4.08793e-24	0.810592	0.802825	0.0396152	0.0423709	6.05803e-26	3251.13
MA0746.1 SP3	9.92462	4.35948e-24	0.923041	0.914963	0.0388755	0.044096	9.94436e-29	3281.56
TA0060_SP3_DBD_monomer	9.92418	4.37913e-24	0.922904	0.914819	0.0389145	0.0441383	1.00473e-28	3281.54
AJ_E2F1::HES7_002	9.89116	5.14073e-24	0.772431	0.765044	0.03797	0.0403946	1.34731e-25	3248.54
BU0009 E2F3_primary	9.87794	5.38114e-24	0.814367	0.804929	0.0499837	0.0516276	2.75843e-24	3234.74
MA0493.1 Klf1	9.87252	5.6006e-24	0.908264	0.901	0.0386779	0.0397507	4.67297e-24	3232.48
AJ_E2F1::EOMES_002	9.85211	7.60064e-24	0.775457	0.768408	0.0364924	0.0386926	2.8667e-25	3246.93
TA0034_EGR1_full_monomer	9.83861	7.89896e-24	0.795519	0.787052	0.0453005	0.0464906	7.52938e-24	3231.84
MA0048.1 NHLH1	9.83376	9.10741e-24	0.870555	0.863088	0.0388152	0.0410582	4.40429e-25	3245.8
AJ_GCM1::NHLH1_001	9.74347	2.21514e-23	0.804063	0.798028	0.0319902	0.033485	3.13531e-24	3240.85
E2F4_HUMAN.H10MO.A	9.69531	3.59369e-23	0.854831	0.848214	0.0352934	0.0368965	5.80088e-24	3240.27
ZIC3_HUMAN.H10MO.C	9.62559	7.23045e-23	0.936792	0.931815	0.0267556	0.0279473	1.28377e-23	3239.88
AJ_E2F1::ELK1_001	9.5879	1.19056e-22	0.777444	0.769795	0.0395696	0.0431815	2.9464e-25	3261.13
MZF1_HUMAN.H10MO.D	9.54156	2.03753e-22	0.962009	0.956013	0.0302729	0.0340436	2.39532e-26	3276.87
AJ_ETV5::TCF3_002	9.50367	2.44914e-22	0.803783	0.797924	0.0318495	0.0333272	3.77946e-23	3240.7
REST_HUMAN.H10MO.A	9.47378	2.92091e-22	0.729415	0.722978	0.0365063	0.0366795	1.70763e-21	3222.57
AJ_GCM1::PITX1_001	9.47943	2.98712e-22	0.801636	0.796334	0.0292998	0.0302222	1.72132e-22	3234.12
ZN423_HUMAN.H10MO.D	9.43703	3.37809e-22	0.743162	0.735639	0.0456975	0.0429396	4.42204e-19	3195.79
AJ_E2F1::EOMES_001	9.46082	3.57619e-22	0.767601	0.761614	0.0331893	0.0341889	2.31929e-22	3233.52
TA0039_Egr3_DBD_monomer	9.44184	4.31365e-22	0.7942	0.786456	0.0430138	0.044314	2.7684e-22	3233.57
TA0036_EGR2_full_monomer	9.44641	4.52897e-22	0.838369	0.830586	0.0418286	0.044561	1.33149e-23	3249.2
MA0003.2 TFAP2A	9.44396	4.88724e-22	0.857007	0.850097	0.0364472	0.0395984	2.17383e-24	3258.89
MA0747.1 SP8	9.37301	1.05929e-21	0.906365	0.899452	0.0356146	0.039951	2.12791e-25	3275.52
TA0062_SP8_DBD_monomer	9.36795	1.11251e-21	0.906363	0.899454	0.0356105	0.0399428	2.27396e-25	3275.47
TA0078_ZNF524_full_dimer	9.33417	1.2174e-21	0.797299	0.789765	0.0425789	0.0436064	1.30339e-21	3230.91
CTCF_HUMAN.H10MO.A	9.31826	1.25785e-21	0.812946	0.805715	0.0425939	0.0418635	4.15452e-20	3213.35
HU0036_ZIC2	9.32042	1.59111e-21	0.923238	0.917595	0.030447	0.0327572	2.01178e-23	3254.01
TA0223_NFIX_full_dimer	9.29148	1.64207e-21	0.822573	0.815273	0.0430436	0.0423852	4.55717e-20	3214.12
HU0005_ZSCAN22	9.24254	3.05303e-21	0.823044	0.816457	0.0371895	0.038515	1.23696e-21	3235.94
AJ_GCM1::PITX1_003	9.21926	3.74702e-21	0.798165	0.792791	0.030623	0.0314917	2.77968e-21	3232.76
PAX5_HUMAN.H10MO.S	9.21146	4.46877e-21	0.967293	0.962465	0.0265411	0.0283516	1.17813e-22	3250.52
AJ_GCM1::SPDEF_003	9.20008	4.57697e-21	0.760512	0.754979	0.031422	0.0324995	2.07892e-21	3235.35
HIF1A_HUMAN.H10MO.A	9.10872	1.21276e-20	0.8655	0.857454	0.0444095	0.0477871	1.777e-22	3254.1
MA0014.2 PAX5	9.03507	1.87348e-20	0.840364	0.836015	0.0265883	0.0259579	8.09373e-19	3210.63
HES1_HUMAN.H10MO.D	9.0214	2.49044e-20	0.895031	0.890251	0.0277332	0.0286305	1.32963e-20	3234.5
AJ_HES1	9.01753	2.70844e-20	0.858831	0.849392	0.053821	0.0565942	3.11745e-21	3242.99
AJ_GCM1::FIGLA_008	9.01342	2.78611e-20	0.793111	0.787205	0.0338216	0.0354197	4.52806e-21	3241.08
TA0771_Egr1_mouse	9.01239	3.07699e-20	0.851519	0.844299	0.0399152	0.0433507	2.13653e-22	3258.71
MA0139.1 CTCF	8.95583	4.02299e-20	0.819424	0.812948	0.0397159	0.0390081	1.03399e-18	3213.07
TA0352_HEY2_DBD_dimer	8.96266	4.57921e-20	0.866318	0.858805	0.0429206	0.0453264	3.74384e-21	3245.02
AJ_GCM1::ELF1_003	8.96104	4.59101e-20	0.804597	0.799036	0.0319351	0.0335556	5.73477e-21	3242.64
GLIS1_HUMAN.H10MO.D	8.92726	6.1704e-20	0.798804	0.791701	0.0412455	0.0430034	1.47732e-20	3239.03
AJ_GCM1::FIGLA_009	8.923	6.45933e-20	0.815762	0.809823	0.0344225	0.0359764	1.26964e-20	3240.15
AHR_HUMAN.H10MO.B	8.88946	8.09999e-20	0.895689	0.887816	0.0473008	0.0478246	2.2225e-19	3225.27
TA0067_ZBTB7A_DBD_monomer	8.88302	8.3469e-20	0.844425	0.837974	0.0392009	0.039198	5.32616e-19	3220.52
MA0750.1 ZBTB7A	8.87473	9.01119e-20	0.844357	0.83791	0.0392178	0.0392088	5.79369e-19	3220.46
AJ_GCM1::MAX_005	8.86628	1.01874e-19	0.740675	0.734971	0.0341801	0.0347433	1.83942e-19	3227.6
GCM2_HUMAN.H10MO.D	8.83669	1.31309e-19	0.846644	0.83984	0.0412154	0.0415775	4.20709e-19	3224.29
AJ_TFAP2C::MAX_004	8.84275	1.53309e-19	0.76729	0.76089	0.0356131	0.0391821	4.04669e-22	3265.3
MA0006.1 Ahr::Arnt	8.83335	1.63441e-19	0.961997	0.954042	0.0447406	0.0487347	1.04178e-21	3260.19
AJ_GCM1::FIGLA_001	8.82856	1.72754e-19	0.825639	0.819523	0.0342527	0.0374985	7.16009e-22	3262.75
MA1099.1 Hes1	8.80382	1.93776e-19	0.90261	0.895669	0.040837	0.0426133	4.44299e-20	3239.42
MA0105.2 NFKB1	8.79315	1.99337e-19	0.856325	0.848866	0.0451294	0.0458064	3.94981e-19	3226.96
HU0030_ZNF33A	8.74846	3.17294e-19	0.743704	0.738585	0.0304783	0.0316206	1.1587e-19	3236.75
TA0772_MTF1_DBD_monomer	8.68949	4.65363e-19	0.773849	0.767964	0.037387	0.0365315	1.38766e-17	3210.97
NDF1_HUMAN.H10MO.C	8.69415	4.99334e-19	0.904082	0.89891	0.0314958	0.0321331	6.56738e-19	3229.22
MA0863.1 MTF1	8.68061	5.04727e-19	0.774008	0.768134	0.0373482	0.0364973	1.48291e-17	3211.01
MA0694.1 ZBTB7B	8.68462	5.36606e-19	0.84157	0.835378	0.0379595	0.0385027	1.08722e-18	3226.66
TA0068_ZBTB7B_full_monomer	8.68064	5.55876e-19	0.841526	0.83534	0.0379534	0.0384844	1.15176e-18	3226.53
MA0472.2 EGR2	8.66915	6.61157e-19	0.840301	0.833257	0.0421062	0.0439178	1.61542e-19	3239.21
AJ_E2F1::ELK1_002	8.6699	6.86286e-19	0.780657	0.774108	0.0384356	0.040852	3.80659e-20	3248.09
MA0154.2 EBF1	8.65704	7.30573e-19	0.915839	0.909763	0.0365125	0.0379287	2.44827e-19	3237.33
TA0035_EGR2_DBD_monomer	8.65391	7.58747e-19	0.840268	0.833236	0.0421134	0.0439218	1.87097e-19	3239.17
AJ_E2F3::FOXO6_001	8.61531	9.22957e-19	0.771558	0.766321	0.0334145	0.0327932	1.91034e-17	3212.75
AJ_GCM1::FIGLA_003	8.63116	9.99648e-19	0.816511	0.810499	0.0350381	0.0376825	2.20336e-20	3253.83
BU0025 Glis2_primary	8.60149	1.19248e-18	0.842437	0.837091	0.0324797	0.0335851	5.69096e-19	3235.24
AJ_GCM2::E2F8	8.58583	1.28895e-18	0.79054	0.786	0.0283311	0.0285506	4.06483e-18	3223.85
TA0052_KLF14_DBD_monomer	8.59891	1.32826e-18	0.850183	0.842548	0.0447736	0.0480336	3.6577e-20	3252.61
MA0740.1 KLF14	8.59871	1.33063e-18	0.850409	0.842785	0.0447062	0.0479613	3.66426e-20	3252.61
AJ_GCM1::NHLH1_002	8.56241	1.77881e-18	0.826442	0.8214	0.0301429	0.0318416	1.68398e-19	3245.16
AJ_GCM1::SPDEF_001	8.54679	2.01002e-18	0.838266	0.832535	0.0345805	0.0362534	3.42054e-19	3241.58
AJ_GCM1::ETV4	8.47501	3.41395e-18	0.79891	0.793429	0.0348688	0.0349157	1.61179e-17	3221.12
NFIA_HUMAN.H10MO.C	8.43258	4.39847e-18	0.821845	0.816192	0.0378413	0.0361281	4.71146e-16	3201.83
HTF4_HUMAN.H10MO.B	8.43653	5.78756e-18	0.942435	0.937245	0.0306043	0.0332921	6.04366e-20	3259.52
TA0221_NFIA_full_dimer	8.37199	7.67318e-18	0.784922	0.778148	0.0453176	0.0436177	4.60404e-16	3204.97
MA0119.1 NFIC::TLX1	8.3798	7.71251e-18	0.793275	0.786574	0.0435492	0.0431526	7.05582e-17	3216.71
MA0145.1 Tcfcp2l1	8.36929	9.12312e-18	0.87758	0.872459	0.032315	0.0330526	9.54406e-18	3230.34
MA0145.2 Tcfcp2l1	8.36057	9.84316e-18	0.877302	0.872181	0.032352	0.0330851	1.04054e-17	3230.27
AJ_ERF::HES7_002	8.3479	1.05984e-17	0.768949	0.763791	0.0331369	0.0333575	3.3071e-17	3223.38
ZBTB4_HUMAN.H10MO.D	8.30401	1.60279e-17	0.778605	0.773076	0.0352513	0.0359608	1.99726e-17	3229.17
MA0155.1 INSM1	8.31794	1.60801e-17	0.892457	0.887286	0.0311336	0.0336365	3.1677e-19	3256.09
GN_MYRF_TOP1000	8.30969	1.62708e-17	0.859037	0.852874	0.038182	0.0400943	2.64341e-18	3242.35
AJ_TFAP2C::MAX_002	8.27745	2.05454e-17	0.778448	0.772497	0.0377775	0.0388428	1.48439e-17	3232.68
AJ_ETV2::TCF3	8.25673	2.28468e-17	0.806916	0.801522	0.0354016	0.03526	1.39017e-16	3218.86
AJ_ETV2::HES7_002	8.23898	3.24202e-17	0.760554	0.754772	0.0348201	0.0379824	3.3126e-19	3260.91
AJ_GCM1::TBX21_001	8.20484	4.02018e-17	0.822557	0.816772	0.0363034	0.0381153	6.83816e-18	3242.27
MA0018.1 CREB1	8.17288	4.4432e-17	0.878735	0.872835	0.0400414	0.0389344	1.16745e-15	3209.01
BU0095 Zfp161_primary	8.18159	4.53609e-17	0.800175	0.791421	0.0570493	0.0577746	9.00836e-17	3225.98
AJ_GCM2::FIGLA_001	8.1773	4.7609e-17	0.803313	0.798277	0.0326767	0.0332651	6.69074e-17	3228.26
AJ_ETV2::RFX5_001	8.15439	6.31866e-17	0.779999	0.77484	0.0322593	0.0342123	5.39013e-18	3247.04
AJ_GCM1::MAX_002	8.13033	6.98381e-17	0.727417	0.722334	0.0334338	0.0337605	1.6539e-16	3224.72
AJ_ETV2::NHLH1_001	8.07528	1.20024e-16	0.765542	0.760079	0.0349823	0.0365684	2.86511e-17	3240.23
SRBP1_HUMAN.H10MO.B	8.07553	1.2294e-16	0.903623	0.898633	0.0315585	0.0334154	1.21847e-17	3246.27
AJ_ERF::HES7_001	8.06247	1.32391e-16	0.760849	0.755692	0.0332353	0.0345733	4.40075e-17	3237.98
AJ_ETV2::NHLH1_002	8.06199	1.35112e-16	0.763307	0.757411	0.0377031	0.0395336	2.62937e-17	3241.66
MA0632.1 Tcfl5	8.05054	1.55645e-16	0.92716	0.919893	0.0455242	0.048826	6.38672e-18	3252.48
TA0222_NFIB_full_dimer	7.99372	1.96566e-16	0.787424	0.781061	0.0447818	0.0429072	1.04373e-14	3203.21
AJ_GCM2::ELK1	7.98257	2.42757e-16	0.820692	0.815867	0.0323542	0.0326372	5.86913e-16	3224.28
AJ_E2F1::ELK1_003	7.95725	3.18381e-16	0.779822	0.774275	0.0362955	0.0376719	1.24836e-16	3236.95
MAFA_HUMAN.H10MO.D	7.8677	6.49624e-16	0.828949	0.825068	0.0260477	0.026651	6.35233e-16	3230.49
MA0138.1 REST	7.86009	6.62046e-16	0.784415	0.779479	0.0338386	0.0339027	2.32766e-15	3221.36
COE1_HUMAN.H10MO.A	7.86406	6.65236e-16	0.869566	0.864116	0.036693	0.0374292	7.84752e-16	3229.15
TA0045_HIC2_DBD_monomer	7.86632	7.1616e-16	0.948671	0.944481	0.0269447	0.0288099	4.09395e-17	3250.98
MA0738.1 HIC2	7.86579	7.19301e-16	0.948683	0.944493	0.0269477	0.0288135	4.10998e-17	3250.98
TA0220_NFKB2_DBD_dimer	7.74792	1.76307e-15	0.802634	0.795949	0.0451527	0.0466226	9.80753e-16	3234.59
MA0778.1 NFKB2	7.74792	1.76307e-15	0.802634	0.795949	0.0451527	0.0466226	9.80753e-16	3234.59
TA0857_EGR4_DBD_monomer	7.73224	1.98623e-15	0.785968	0.780382	0.0379562	0.0390305	1.42145e-15	3232.73
TA0861_NFIX_full_dimer	7.6806	2.71894e-15	0.805331	0.799403	0.0426009	0.0416352	3.59145e-14	3211.06
AJ_ERF::NHLH1	7.68178	2.86287e-15	0.795849	0.791019	0.0337269	0.0339472	7.20897e-15	3223.33
CXXC1_HUMAN.H10MO.D	7.66405	3.25191e-15	0.959057	0.955197	0.0272196	0.0271885	1.26078e-14	3220.07
AJ_TFAP2C::DLX3_001	7.65271	3.67574e-15	0.804173	0.800117	0.028208	0.0286208	5.77648e-15	3226.8
MA0048.2 NHLH1	7.65879	3.74432e-15	0.880505	0.874275	0.0418346	0.0439748	7.07549e-16	3242.83
AJ_CLOCK::FIGLA_001	7.63944	3.99941e-15	0.80968	0.805275	0.0310293	0.0311339	1.18898e-14	3221.99
TA0367_NHLH1_full_dimer	7.6492	4.04404e-15	0.880693	0.874475	0.0418069	0.0439488	7.63436e-16	3242.86
NFKB1_HUMAN.H10MO.B	7.63862	4.30128e-15	0.873393	0.867588	0.0395636	0.041075	1.73947e-15	3237.07
MA0472.1 EGR2	7.63149	5.20122e-15	0.89483	0.888734	0.0385982	0.0432683	1.54092e-17	3275.16
NRF1_HUMAN.H10MO.A	7.59828	6.3163e-15	0.794736	0.785922	0.0583798	0.0627488	3.06694e-16	3253.54
AJ_GCM2::TBX21_001	7.57642	6.65317e-15	0.826773	0.821848	0.0348894	0.0350998	1.6686e-14	3223.12
TFCP2_HUMAN.H10MO.D	7.58266	6.71358e-15	0.881437	0.877709	0.0256121	0.0265731	2.84705e-15	3236.77
MA0138.2 REST	7.5026	1.16462e-14	0.735354	0.730221	0.0371768	0.0369276	5.71844e-14	3217.72
BACH1_HUMAN.H10MO.A	7.50605	1.17493e-14	0.859119	0.854208	0.0349183	0.0353336	2.09021e-14	3225.62
TA0061_SP4_full_monomer	7.47327	1.67113e-14	0.82445	0.81746	0.0474305	0.0505902	1.41049e-15	3249.79
MA0685.1 SP4	7.45938	1.86198e-14	0.824283	0.817301	0.0474743	0.0506218	1.61288e-15	3249.65
AP2A_HUMAN.H10MO.C	7.45875	1.9079e-14	0.874117	0.869433	0.0314924	0.0339726	8.17147e-16	3255.34
HU0020_ZNF519	7.42251	2.21699e-14	0.794892	0.78923	0.0411302	0.0411754	6.91166e-14	3221.02
AJ_E2F3::TBX21_002	7.40987	2.61737e-14	0.747464	0.742332	0.0360369	0.0374313	1.06817e-14	3237.29
MA0259.1 ARNT::HIF1A	7.40146	3.26974e-14	0.937261	0.930959	0.0402612	0.0461488	3.09017e-17	3287.39
AJ_GCM2::FIGLA_002	7.36397	4.17162e-14	0.814696	0.809785	0.0324876	0.0361122	3.05463e-16	3270.66
AJ_ELK1::EOMES_001	7.34783	4.2633e-14	0.766869	0.762738	0.0291278	0.0303876	1.37549e-14	3239.31
MA0597.1 THAP1	7.29106	6.70606e-14	0.950644	0.947488	0.0222093	0.023405	1.24685e-14	3244.03
AJ_GCM1::ELF1_002	7.2679	8.45923e-14	0.833692	0.829338	0.0297172	0.0324265	2.12937e-15	3261.08
AJ_ETV2::RFX5_004	7.20581	1.23018e-13	0.754288	0.750304	0.0290605	0.0298699	9.08808e-14	3232.53
MA0112.2 ESR1	7.17538	1.47291e-13	0.778287	0.773635	0.0350388	0.0349968	4.71911e-13	3220.05
ESR1_HUMAN.H10MO.S	7.14697	1.81867e-13	0.803702	0.799073	0.0350686	0.0349601	6.33326e-13	3219.24
ERR1_HUMAN.H10MO.D	7.14713	2.11468e-13	0.865758	0.861111	0.0321471	0.0351894	4.94918e-15	3262.69
ETS0019 h-ETV6	7.06244	3.72439e-13	0.924423	0.920692	0.0272309	0.0285626	9.67794e-14	3241.82
IRF4_HUMAN.H10MO.C	7.01996	4.50985e-13	0.880702	0.876701	0.0315369	0.0307386	4.29237e-12	3209.97
ETS2_HUMAN.H10MO.C	6.97884	6.58211e-13	0.933383	0.929826	0.0270362	0.0275267	7.8e-13	3228.32
MA0105.1 NFKB1	6.95298	7.68556e-13	0.890046	0.884585	0.0425218	0.0423942	2.47009e-12	3219.28
MA0056.1 MZF1	7.00269	7.90901e-13	0.996562	0.994603	0.0112081	0.0152153	1.15346e-20	3401.55
AJ_TFAP4::ETV4	6.93181	9.88025e-13	0.848403	0.844001	0.0324136	0.0343466	1.58828e-13	3246.63
AJ_ETV2::TBX21_001	6.9062	1.15217e-12	0.752971	0.749425	0.026756	0.0277481	5.52992e-13	3236.58
TA0042_GLIS1_DBD_monomer	6.89873	1.20563e-12	0.740527	0.7356	0.0374226	0.0385883	7.67571e-13	3233.97
MA0735.1 GLIS1	6.89357	1.2514e-12	0.740059	0.73513	0.0374709	0.0386324	8.02735e-13	3233.91
TF65_HUMAN.H10MO.A	6.87154	1.42931e-12	0.879477	0.874225	0.0407185	0.0412748	2.06369e-12	3226.39
TA0351_HEY1_DBD_dimer	6.8779	1.43008e-12	0.854269	0.847878	0.0480805	0.0502241	4.83116e-13	3239.9
AJ_TFAP2C::DLX3_002	6.85706	1.51376e-12	0.788991	0.78539	0.0287664	0.0283278	8.19696e-12	3214.14
ZEP2_HUMAN.H10MO.D	6.85905	1.57352e-12	0.903528	0.900578	0.0228275	0.0232243	1.90824e-12	3227.99
AJ_MYBL1::FIGLA_003	6.84989	1.62418e-12	0.807014	0.803177	0.0303556	0.0302291	5.29643e-12	3218.79
MA0823.1 HEY1	6.85679	1.66498e-12	0.854272	0.847907	0.0480482	0.0501777	5.72573e-13	3239.78
MA0057.1 MZF1.var.2	6.82306	2.20648e-12	0.94498	0.941361	0.0267429	0.0286911	1.99113e-13	3252.63
RFX2_HUMAN.H10MO.C	6.80942	2.33373e-12	0.778504	0.7735	0.0381053	0.0397185	8.9046e-13	3238.9
AJ_ERF::HES7_003	6.76757	3.10284e-12	0.781599	0.777469	0.0319359	0.0329718	1.88057e-12	3234.54
AJ_E2F3::FOXO6_002	6.75847	3.27698e-12	0.751194	0.74689	0.033548	0.0344011	2.73291e-12	3231.48
AJ_TFAP2C::ONECUT2_003	6.74628	3.30005e-12	0.763313	0.759882	0.0281282	0.0274273	2.57586e-11	3210.13
MA0506.1 NRF1	6.76076	3.44097e-12	0.873474	0.866188	0.0543426	0.0582965	3.24266e-13	3252.59
TA0032_CTCF_full_monomer	6.71915	3.76592e-12	0.794451	0.789288	0.04399	0.0413907	1.248e-10	3196.29
HEY1_HUMAN.H10MO.D	6.7218	4.12714e-12	0.838194	0.832904	0.0422492	0.0424871	8.31663e-12	3222.95
AJ_RFX3::HES7	6.70387	4.94382e-12	0.766119	0.761903	0.0326033	0.0339873	1.92134e-12	3238.95
HU0015_ZNF273	6.66203	5.79921e-12	0.88923	0.88238	0.0579906	0.0554173	9.77709e-11	3202.19
ATF6A_HUMAN.H10MO.B	6.67621	6.19427e-12	0.840371	0.835409	0.0377203	0.0401949	8.52365e-13	3249.33
TA0054_Klf12_DBD_monomer	6.65749	6.86857e-12	0.845918	0.84062	0.0411901	0.0430165	2.47897e-12	3239.79
AJ_CLOCK::NHLH1_001	6.65056	6.88521e-12	0.775299	0.771174	0.0331045	0.033493	1.04544e-11	3225.56
MA0742.1 Klf12	6.64675	7.40457e-12	0.845835	0.840545	0.0411989	0.0430235	2.68571e-12	3239.77
AJ_GCM2::HES7	6.63554	7.5763e-12	0.796694	0.792346	0.0351837	0.0353712	1.51369e-11	3222.82
RELB_HUMAN.H10MO.C	6.61898	8.10852e-12	0.896911	0.89336	0.0296775	0.0289285	5.91824e-11	3210
MA0098.1 ETS1	6.6184	9.86817e-12	0.997945	0.997556	0.00284678	0.00318295	1.28913e-13	3273.76
AJ_ETV2::RFX5_002	6.53683	1.48358e-11	0.754998	0.751131	0.0320698	0.031929	4.34183e-11	3218.7
MA0149.1 EWSR1-FLI1	6.52696	1.62875e-11	0.750024	0.743061	0.0568743	0.0576046	2.31246e-11	3226.03
AJ_TFAP2C::MAX_001	6.50329	1.9927e-11	0.788452	0.783745	0.0375564	0.0391132	8.44709e-12	3238.51
SMAD1_HUMAN.H10MO.D	6.49272	2.00192e-11	0.907021	0.903534	0.0291927	0.0289843	6.45558e-11	3217.54
MA0504.1 NR2C2	6.47483	2.3944e-11	0.861059	0.857038	0.0324863	0.0335583	1.45689e-11	3234.78
MA0522.1 Tcf3	6.47163	2.439e-11	0.925189	0.920379	0.0389776	0.0401648	1.65104e-11	3233.67
TA0044_GLIS3_DBD_monomer	6.44277	2.83779e-11	0.7819	0.777602	0.0360828	0.0360055	7.32973e-11	3219.65
MA0737.1 GLIS3	6.42157	3.27944e-11	0.781936	0.777657	0.0360339	0.0359674	8.31141e-11	3219.77
MA0080.1 SPI1	6.45775	3.65964e-11	0.9968	0.995973	0.00498729	0.00696179	1.01607e-18	3424.57
ETS0006 h-ELF5	6.35599	5.26521e-11	0.940675	0.93772	0.0246119	0.0251119	5.40581e-11	3229.26
MA0461.1 Atoh1	6.35642	5.2692e-11	0.942729	0.936636	0.0506106	0.0517777	4.84504e-11	3230.45
AJ_GCM1::ELK3_001	6.34382	5.97353e-11	0.782867	0.778437	0.0357572	0.037755	1.45528e-11	3244.94
BU0027 Gmeb1_primary	6.33046	6.37227e-11	0.847367	0.843001	0.0359809	0.0372653	3.53132e-11	3235.97
AJ_ETV2::PAX5	6.3225	6.50514e-11	0.748815	0.745376	0.0290613	0.0293714	9.76705e-11	3225.1
MA0830.1 TCF4	6.3226	6.96854e-11	0.947231	0.942625	0.0369431	0.0393996	1.10981e-11	3249.74
TA0375_TCF4_DBD_dimer	6.31943	7.11687e-11	0.947316	0.942721	0.0368787	0.0393279	1.13917e-11	3249.7
IKZF1_HUMAN.H10MO.C	6.32291	7.22192e-11	0.980187	0.977866	0.0180469	0.0198698	2.75692e-12	3265.67
MA0500.1 Myog	6.25921	1.01848e-10	0.930203	0.92499	0.0436093	0.045002	6.60689e-11	3234.32
MA0615.1 Gmeb1	6.24575	1.11647e-10	0.850747	0.846543	0.0351643	0.036371	6.60755e-11	3235.36
TA0781_E2F1_DBD_dimer	6.23099	1.16501e-10	0.805377	0.800773	0.040185	0.0398757	3.47062e-10	3217.3
MA0024.3 E2F1	6.22977	1.17439e-10	0.805414	0.800816	0.0401476	0.0398373	3.5012e-10	3217.29
AJ_TFAP2C::ONECUT2_001	6.23839	1.17806e-10	0.766538	0.763196	0.0278775	0.0289523	5.91185e-11	3237.23
BU0024 Gcm1_primary	6.22518	1.24643e-10	0.850773	0.846957	0.0326363	0.0330973	1.61337e-10	3226.58
AJ_E2F3::TBX21_001	6.22847	1.25168e-10	0.808913	0.80499	0.0328976	0.0340389	7.3155e-11	3235.53
AJ_GCM1::ETV7_002	6.17041	1.76304e-10	0.754561	0.751064	0.0304598	0.0305984	3.24961e-10	3222.49
AJ_TFAP4::ETV1	6.17597	1.77669e-10	0.825694	0.821508	0.0352321	0.0366376	8.56132e-11	3237.82
TA0395_CREB3L1_full_dimer	6.11012	2.50052e-10	0.765337	0.760381	0.0449538	0.043738	1.43557e-09	3209.26
INSM1_HUMAN.H10MO.C	6.11553	2.81438e-10	0.854808	0.850512	0.0344649	0.0380292	1.18883e-11	3266.81
TA0120_ELK1_full_dimer	6.09642	2.98908e-10	0.734507	0.729972	0.0385244	0.0402078	1.26756e-10	3239.5
MA0107.1 RELA	6.08768	3.02346e-10	0.878683	0.873935	0.0418444	0.0421117	5.11355e-10	3223.27
TA0400_Creb3l2_DBD_dimer	6.08202	3.10511e-10	0.797268	0.792611	0.0413826	0.0413278	6.9462e-10	3219.99
AJ_ETV2::EOMES_001	6.05209	3.87724e-10	0.751707	0.748321	0.0295523	0.030219	3.61651e-10	3230.23
TA0163_GCM1_full_monomer	6.02913	4.31395e-10	0.851025	0.847043	0.0359878	0.0356405	1.27813e-09	3216.48
TA0780_E2F1_DBD_dimer	6.01726	4.58153e-10	0.814618	0.809948	0.0427766	0.0418584	2.04891e-09	3211.56
ESR2_HUMAN.H10MO.A	6.02479	4.64407e-10	0.818969	0.81538	0.0313269	0.0321921	3.60356e-10	3232.43
TA0865_HES5_DBD_dimer	6.0306	4.64902e-10	0.779236	0.773987	0.0443284	0.0470691	1.02321e-10	3247.62
MA0646.1 GCM1	6.01558	4.70242e-10	0.850937	0.846963	0.0360058	0.0356489	1.39886e-09	3216.37
AJ_ETV7_001	6.01459	4.82701e-10	0.899261	0.895423	0.034252	0.0344477	8.23977e-10	3222.98
AJ_ELK1::PAX5	6.01818	4.85533e-10	0.744792	0.741388	0.0296807	0.0305611	3.49918e-10	3233.32
MA0649.1 HEY2	6.01621	4.91007e-10	0.861331	0.85627	0.0441923	0.0454516	3.69232e-10	3232.81
TA0353_HEY2_full_dimer	6.01232	5.03355e-10	0.861223	0.856165	0.0441974	0.0454595	3.77766e-10	3232.84
ARNT_HUMAN.H10MO.B	5.99615	5.96425e-10	0.926923	0.920923	0.049597	0.0541564	4.35262e-11	3261.43
REL_HUMAN.H10MO.C	5.97809	5.98574e-10	0.90008	0.896216	0.0351544	0.034881	1.62898e-09	3217.27
MA0767.1 GCM2	5.97405	6.5418e-10	0.879773	0.87601	0.0325619	0.0340525	2.64752e-10	3240.43
TA0164_GCM2_DBD_monomer	5.97163	6.64271e-10	0.879691	0.875926	0.0325836	0.0340768	2.6851e-10	3240.45
RREB1_HUMAN.H10MO.D	5.95379	7.41933e-10	0.858771	0.854971	0.0330411	0.0344947	3.21816e-10	3239.64
MA0499.1 Myod1	5.91845	9.22705e-10	0.918995	0.914387	0.040453	0.0420849	4.59373e-10	3238.02
AJ_TFAP2C::ONECUT2_004	5.89226	1.06888e-09	0.778564	0.775597	0.0265353	0.0272044	9.0724e-10	3231.38
AJ_GCM1::MAX_001	5.89548	1.0801e-09	0.786339	0.781806	0.0394632	0.0415721	3.4015e-10	3243.85
AJ_ELK1::EOMES_002	5.89357	1.12026e-09	0.786621	0.782686	0.0335059	0.0361164	1.47331e-10	3254.95
PKNX2_HUMAN.H10MO.D	5.88408	1.12888e-09	0.885145	0.882004	0.0280448	0.0288415	8.57846e-10	3232.77
HU0021_ZNF322	5.87472	1.15207e-09	0.805729	0.802089	0.033583	0.0334402	2.68222e-09	3218.75
AJ_TEAD4::ELF1_002	5.86885	1.16796e-09	0.790166	0.78626	0.0367188	0.035892	5.01621e-09	3211.12
AJ_RFX3::FIGLA_002	5.8703	1.20781e-09	0.80578	0.802339	0.0312707	0.0316556	1.59812e-09	3225.8
AJ_ETV2::HES7_003	5.87718	1.24136e-09	0.768207	0.763962	0.0362267	0.0390775	1.60401e-10	3255.31
HU0019_ZNF71	5.85402	1.28095e-09	0.783389	0.779654	0.0352107	0.0344154	5.4724e-09	3211.09
MA0131.1 HINFP	5.85438	1.35765e-09	0.845126	0.840974	0.0372669	0.0383186	1.04009e-09	3232.69
HES7_HUMAN.H10MO.D	5.81169	1.82352e-09	0.768116	0.762936	0.0455546	0.0481957	5.05272e-10	3245.88
BU0003 Ascl2_primary	5.80995	1.83342e-09	0.851759	0.847631	0.0364901	0.0384139	6.09441e-10	3243.53
AJ_FLI1::ETV7	5.77624	2.10055e-09	0.790945	0.787078	0.0365483	0.0361231	6.04064e-09	3215.65
TA0145_FLI1_full_monomer	5.77002	2.15308e-09	0.758446	0.754373	0.0389545	0.0380743	8.81628e-09	3211.09
VDR_HUMAN.H10MO.B	5.77393	2.25585e-09	0.858469	0.855243	0.0290532	0.0301978	1.19196e-09	3237.6
AJ_ELK1::TBX21_001	5.76374	2.28383e-09	0.72114	0.718079	0.0288295	0.028663	5.40076e-09	3218.11
E2F5_HUMAN.H10MO.B	5.76256	2.37545e-09	0.855129	0.850328	0.0440155	0.0450071	2.21068e-09	3230.22
TA0040_GLI2_DBD_monomer	5.75613	2.42384e-09	0.849831	0.846262	0.0333011	0.0334795	3.97397e-09	3222.83
AJ_ELK1::PAX1	5.72559	3.01673e-09	0.747101	0.74387	0.0294528	0.0304963	1.83395e-09	3235.85
MA0598.1 EHF	5.71879	3.07151e-09	0.950308	0.944129	0.057569	0.0583516	3.8257e-09	3226.36
AJ_TFAP2C::ONECUT2_002	5.69503	3.50876e-09	0.771746	0.768552	0.0301659	0.0302775	5.99534e-09	3222.12
AJ_ETV2::SPDEF	5.6659	4.11927e-09	0.770365	0.76666	0.0356326	0.0352778	1.07752e-08	3216.35
HES5_HUMAN.H10MO.D	5.67488	4.12596e-09	0.791994	0.787104	0.0446967	0.0465685	2.04662e-09	3238.7
AJ_ELK1::ETV7	5.6603	4.28303e-09	0.7477	0.744138	0.0341447	0.0339605	9.68498e-09	3218.27
GSC2_HUMAN.H10MO.D	5.67109	4.39239e-09	0.916128	0.913127	0.0264116	0.0286371	5.36276e-10	3257.87
MA0527.1 ZBTB33	5.65644	4.71506e-09	0.802663	0.797925	0.0425196	0.0453038	1.08433e-09	3249.27
MA0821.1 HES5	5.65312	4.73214e-09	0.79416	0.789439	0.043069	0.0451503	1.91219e-09	3241.56
AJ_HOXB2::NHLH1_002	5.64045	4.82418e-09	0.825175	0.822281	0.0278541	0.0276948	1.09529e-08	3218.14
TA0109_EBF1_full_dimer	5.61829	5.5135e-09	0.825465	0.821063	0.0425044	0.0422903	1.21713e-08	3218.42
HIC1_HUMAN.H10MO.C	5.627	5.53807e-09	0.904777	0.900414	0.0399465	0.0419187	2.17913e-09	3242.03
MA0154.3 EBF1	5.61715	5.55211e-09	0.825506	0.821104	0.0425018	0.0422942	1.21948e-08	3218.49
TA0349_HES5_DBD_dimer	5.6042	6.33297e-09	0.794258	0.789582	0.0430599	0.0451067	2.66058e-09	3241.21
AJ_TFAP4::FLI1_002	5.60186	6.48731e-09	0.838794	0.835116	0.0335409	0.0354988	1.9254e-09	3246.06
AJ_ERF::TBX21_001	5.55386	8.41004e-09	0.729283	0.726433	0.026862	0.0277364	5.72556e-09	3234.59
HINFP_HUMAN.H10MO.C	5.52815	1.01338e-08	0.804068	0.8005	0.0326117	0.0349114	2.11012e-09	3251.57
MA0521.1 Tcf12	5.51102	1.07399e-08	0.922123	0.917602	0.0432409	0.0443238	9.2432e-09	3231.31
GABPA_HUMAN.H10MO.A	5.49977	1.18377e-08	0.871844	0.867669	0.0387831	0.041053	3.63712e-09	3246.13
MA0073.1 RREB1	5.47496	1.36075e-08	0.856221	0.851946	0.0400964	0.0422082	5.0554e-09	3243.5
MA0024.1 E2F1	5.45979	1.41475e-08	0.870814	0.866254	0.0450028	0.0450825	2.43802e-08	3221.3
TA0350_HES7_DBD_dimer	5.46601	1.44679e-08	0.77472	0.769979	0.0441211	0.0469086	3.90287e-09	3248.23
MYOG_HUMAN.H10MO.D	5.45687	1.44797e-08	0.861965	0.857929	0.0396276	0.0399379	2.0845e-08	3223.89
MA0822.1 HES7	5.45049	1.58231e-08	0.774732	0.770004	0.0441473	0.0469154	4.36052e-09	3248.02
MA0695.1 ZBTB7C	5.44473	1.59902e-08	0.862493	0.859097	0.0324976	0.0337108	9.53727e-09	3236.69
TA0069_ZBTB7C_full_monomer	5.43801	1.66247e-08	0.86254	0.85915	0.0324761	0.0336886	9.92575e-09	3236.69
ETS0003 h-ELF2	5.43597	1.73364e-08	0.91385	0.910043	0.0353578	0.0378819	3.68602e-09	3251.96
AJ_GCM1::MAX_004	5.42869	1.754e-08	0.798391	0.793943	0.042698	0.0442823	1.05594e-08	3236.59
BU0044 Mtf1_primary	5.39137	2.09863e-08	0.805238	0.801236	0.0400506	0.040068	3.70336e-08	3220.74
MA0101.1 REL	5.36611	2.42743e-08	0.914078	0.91066	0.0343473	0.0343822	4.18824e-08	3220.98
GLI1_HUMAN.H10MO.C	5.36152	2.53284e-08	0.879792	0.876174	0.0358168	0.036447	2.71395e-08	3228.08
TA0869_CREB3L1_DBD_dimer	5.35216	2.56368e-08	0.767105	0.762629	0.0461798	0.0451135	8.70304e-08	3210.89
AJ_E2F3::EOMES	5.36179	2.63516e-08	0.750575	0.747387	0.0302387	0.0321565	7.38184e-09	3248.34
TA0282_GMEB2_DBD_dimer	5.35409	2.70675e-08	0.888879	0.884333	0.0439688	0.0458866	1.3629e-08	3239.47
AJ_GLI3	5.33216	3.03481e-08	0.781996	0.778139	0.0378736	0.039091	2.13946e-08	3234.41
TA0374_TCF3_DBD_dimer	5.31966	3.38044e-08	0.947646	0.94382	0.0361784	0.0389122	6.75006e-09	3253.87
TA0461_FOXO3_full_multimer	5.29595	3.57678e-08	0.85225	0.848172	0.0419843	0.0415462	8.35042e-08	3216.15
MA0522.2 TCF3	5.30438	3.68355e-08	0.947689	0.94388	0.0361394	0.0388518	7.52975e-09	3253.64
AJ_TEAD4::SPDEF_001	5.2784	3.76992e-08	0.820251	0.816932	0.0358009	0.0338847	2.80996e-07	3198.51
AJ_ETV7::TBX21_001	5.26968	4.25526e-08	0.77507	0.77204	0.0305649	0.0310461	4.7789e-08	3227.28
TA0472_Foxg1_DBD_multimer	5.2504	4.64822e-08	0.825008	0.821391	0.0373634	0.0371749	9.22968e-08	3218.42
TA0394_CREB3L1_DBD_dimer	5.24234	4.78645e-08	0.769904	0.765473	0.0465666	0.0455963	1.454e-07	3211.82
ELF1_HUMAN.H10MO.A	5.2369	5.14845e-08	0.853913	0.850259	0.0368327	0.037689	4.69013e-08	3230.53
TA0458_FOXO1_DBD_multimer	5.20868	5.88075e-08	0.816385	0.812361	0.041824	0.0417002	1.09147e-07	3219.3
TA0467_FOXO6_DBD_multimer	5.19704	6.10208e-08	0.769221	0.765326	0.0416902	0.0404098	2.35922e-07	3207.75
AJ_TEAD4::SPDEF_002	5.19641	6.29478e-08	0.745637	0.74297	0.0277916	0.0277035	1.17129e-07	3219.21
AJ_ETV2::RFX5_003	5.19684	6.51634e-08	0.773805	0.770851	0.0295943	0.0307116	3.99194e-08	3236.88
MA0103.2 ZEB1	5.19315	6.5778e-08	0.925522	0.920616	0.0497964	0.0510389	5.72331e-08	3231.27
TA0284_GMEB2_DBD_dimer	5.17625	7.05612e-08	0.747685	0.744445	0.0338193	0.0337961	1.22273e-07	3220.26
AJ_GCM1::ELK1_001	5.1726	7.21891e-08	0.768148	0.765396	0.0286603	0.028721	1.16002e-07	3221.45
FLI1_HUMAN.H10MO.A	5.1426	8.91989e-08	0.898389	0.894972	0.034029	0.0359363	3.35509e-08	3245.02
TA0354_ID4_DBD_dimer	5.13684	8.99345e-08	0.928857	0.925022	0.0392527	0.0403371	7.29748e-08	3232.43
MA0824.1 ID4	5.13266	9.20132e-08	0.928895	0.925064	0.0392454	0.0403267	7.48267e-08	3232.4
HU0018_ZNF200	5.13609	9.38533e-08	0.877582	0.873995	0.035116	0.0377803	2.0555e-08	3254.01
MA0474.1 Erg	5.12028	9.58665e-08	0.917354	0.914161	0.0337499	0.0336652	1.72027e-07	3219.49
AJ_ERF::ETV7	5.11685	9.62951e-08	0.801438	0.797849	0.0385171	0.0378414	2.54769e-07	3213.19
TA0269_RFX4_DBD_dimer	5.08634	1.20742e-07	0.788497	0.784895	0.0364315	0.0382836	5.32015e-08	3242.68
GLI2_HUMAN.H10MO.B	5.07146	1.26718e-07	0.827862	0.823335	0.0476436	0.0482027	1.55844e-07	3225.56
CR3L1_HUMAN.H10MO.D	5.06792	1.27839e-07	0.801312	0.796938	0.046592	0.0465955	2.1204e-07	3220.58
AJ_MYBL1::EOMES_001	5.0726	1.28355e-07	0.761989	0.759175	0.0289858	0.0299768	8.80327e-08	3235.31
AJ_GCM2::MAX	5.06961	1.29431e-07	0.810621	0.807857	0.0287385	0.0294504	1.13544e-07	3231.19
AJ_ELK1::PAX9	5.06892	1.3029e-07	0.739393	0.736535	0.0296254	0.0304611	1.04509e-07	3232.69
AJ_FLI1::FIGLA	5.07175	1.31272e-07	0.833595	0.8301	0.0352607	0.0372614	4.96592e-08	3245.33
ZBT7B_HUMAN.H10MO.D	5.05305	1.43488e-07	0.785333	0.781585	0.0385028	0.0400916	8.20318e-08	3238.43
AJ_MYBL1::FIGLA_005	5.03712	1.55271e-07	0.813329	0.810369	0.0307446	0.0317492	1.11215e-07	3234.64
KLF12_HUMAN.H10MO.D	5.03838	1.55816e-07	0.887768	0.883908	0.0396086	0.0414137	7.98515e-08	3240.34
TA0338_Ascl2_DBD_dimer	5.02605	1.61373e-07	0.894547	0.890609	0.0419775	0.0422988	2.19103e-07	3223.81
TA0357_MESP1_DBD_dimer	5.02854	1.65347e-07	0.946579	0.943762	0.0287358	0.0302858	6.83118e-08	3244.07
MA0816.1 Ascl2	5.02055	1.66215e-07	0.894471	0.890535	0.0420098	0.0423295	2.25744e-07	3223.79
ZEB1_HUMAN.H10MO.B	5.01871	1.72695e-07	0.946829	0.943921	0.0300653	0.0313266	9.76268e-08	3238.73
HU0037_ZNF415	5.01343	1.75665e-07	0.856017	0.852848	0.0332163	0.0341437	1.42433e-07	3232.56
TLX1_HUMAN.H10MO.D	4.99625	1.80409e-07	0.85664	0.854221	0.0272943	0.0260863	8.74431e-07	3202.23
AJ_RFX3::FIGLA_001	4.99682	1.86096e-07	0.759228	0.756287	0.0320382	0.031765	3.76453e-07	3216.95
PRDM4_HUMAN.H10MO.D	4.96847	2.19393e-07	0.771505	0.768009	0.0377523	0.0379976	3.0411e-07	3223.32
AJ_ERF::EOMES_001	4.95979	2.34625e-07	0.777667	0.775092	0.0271872	0.0280582	1.72152e-07	3234.36
HU0038_ZNF621	4.95331	2.38881e-07	0.822522	0.819415	0.0334726	0.0338695	2.89542e-07	3225.61
AJ_PITX1::HES7_003	4.95269	2.39539e-07	0.810929	0.80849	0.026303	0.0265976	2.95044e-07	3225.33
TA0049_Hic1_DBD_dimer	4.92563	2.81406e-07	0.772445	0.769134	0.0351509	0.0363255	2.00244e-07	3234.97
BU0092 Zbtb7b_primary	4.9063	3.13476e-07	0.836968	0.83346	0.0370943	0.038638	1.82661e-07	3238.58
TA0280_RUNX3_DBD_dimer	4.89018	3.34623e-07	0.771598	0.768507	0.0335734	0.0341373	3.57894e-07	3227.74
AJ_TFAP4::MAX_002	4.89331	3.38412e-07	0.782967	0.779539	0.0359645	0.0378713	1.49222e-07	3243.66
MA0258.2 ESR2	4.88426	3.40667e-07	0.851101	0.847965	0.0346252	0.0346534	5.34302e-07	3220.9
EHF_HUMAN.H10MO.C	4.87011	3.66365e-07	0.901976	0.898957	0.0334769	0.0334505	5.95183e-07	3220.22
AJ_ETV5::CLOCK	4.82932	4.58056e-07	0.806252	0.803474	0.0306735	0.0310656	5.36976e-07	3226.01
MESP1_HUMAN.H10MO.D	4.8176	4.92358e-07	0.935949	0.932519	0.0374334	0.0384712	4.05762e-07	3232.48
MA0004.1 Arnt	4.81009	5.1736e-07	0.917298	0.911215	0.065581	0.0683525	3.02359e-07	3238.87
NFYC_HUMAN.H10MO.B	4.79471	5.30809e-07	0.848101	0.844545	0.0410295	0.0400012	1.47667e-06	3210.07
AJ_ETV2::ETV7	4.79563	5.33785e-07	0.789731	0.786392	0.0380626	0.0375663	1.13043e-06	3215.06
AJ_ETV2::SREBF2_001	4.80166	5.47498e-07	0.803533	0.800794	0.0290676	0.0308446	2.04341e-07	3247.31
MYCN_HUMAN.H10MO.B	4.78673	5.70751e-07	0.922684	0.918804	0.0432062	0.0437656	6.64255e-07	3226.08
MYOD1_HUMAN.H10MO.C	4.78173	5.89423e-07	0.944486	0.941393	0.0342069	0.0349385	5.64044e-07	3229.72
TA0756_Rxra_DBD_dimer	4.77467	6.05517e-07	0.788145	0.78429	0.0431958	0.0436008	7.64291e-07	3224.55
AJ_ERF::ONECUT2	4.75534	6.54691e-07	0.772617	0.770082	0.0292389	0.0287591	1.47631e-06	3213.66
MA0062.2 Gabpa	4.76848	6.62928e-07	0.876831	0.872831	0.0414905	0.0453993	1.13546e-07	3262.49
KAISO_HUMAN.H10MO.S	4.72748	7.82601e-07	0.891834	0.888573	0.0361714	0.0372692	6.10648e-07	3233.62
ETS0004 h-ELF3	4.71583	8.42254e-07	0.925773	0.923356	0.0263635	0.0277066	4.1069e-07	3242.73
MYC_HUMAN.H10MO.A	4.70732	8.78798e-07	0.856636	0.85303	0.0394361	0.0414117	4.37924e-07	3242.35
HU0001_ZNF675	4.69637	9.12963e-07	0.748951	0.745763	0.0357506	0.0366674	7.94e-07	3231.57
AJ_MYBL1::ELF1	4.69628	9.2521e-07	0.766035	0.762885	0.0347303	0.0362569	5.31858e-07	3239.62
AJ_ELK1::SREBF2_001	4.69013	9.68814e-07	0.775907	0.772736	0.0342816	0.0365649	3.32347e-07	3249.79
AJ_ETV7_002	4.67271	1.00442e-06	0.791594	0.788407	0.0370194	0.0368061	1.74687e-06	3218.12
ITF2_HUMAN.H10MO.B	4.66722	1.04091e-06	0.92899	0.924689	0.0495177	0.0497507	1.4385e-06	3222.55
MA0104.2 Mycn	4.65718	1.11588e-06	0.88063	0.87686	0.0424312	0.0437436	8.64554e-07	3233.88
MA0035.1 Gata1	4.6619	1.13537e-06	0.997857	0.997401	0.00483144	0.0052885	2.07303e-07	3262.67
TA0275_RUNX2_DBD_dimer	4.59475	1.51164e-06	0.762776	0.759853	0.033661	0.0343645	1.46187e-06	3229.51
ETS0020 h-ETV7	4.56912	1.75532e-06	0.938705	0.93635	0.0264002	0.0278684	8.04743e-07	3244.82
AJ_ETV2::TBX21_003	4.51755	2.19752e-06	0.763752	0.761174	0.0303982	0.0308239	2.45194e-06	3226.53
TA0148_SPDEF_DBD_monomer	4.51148	2.20968e-06	0.767017	0.764226	0.03401	0.0333649	4.83564e-06	3212.59
AJ_ETV5::FIGLA	4.4782	2.71215e-06	0.819605	0.816383	0.0372517	0.0388806	1.63815e-06	3239.52
AJ_GCM1::MAX_003	4.45919	3.03968e-06	0.74566	0.742681	0.0334116	0.0361482	8.31543e-07	3256.79
AJ_HOXB2::NHLH1_001	4.43277	3.37509e-06	0.797313	0.794975	0.0272862	0.0285056	2.01699e-06	3239.95
SMRC1_HUMAN.H10MO.D	4.40968	3.48687e-06	0.900316	0.897423	0.037731	0.0353346	1.72411e-05	3194.54
MA0098.2 Ets1	4.41606	3.50267e-06	0.876894	0.874129	0.0344306	0.0337762	7.424e-06	3212.58
ETS0001 h-EHF	4.4094	3.76558e-06	0.927291	0.925185	0.0247885	0.0258166	2.41261e-06	3238.52
TA0226_PAX2_DBD_monomer	4.40632	3.82442e-06	0.80082	0.798457	0.027793	0.0289846	2.38362e-06	3239.14
TA0127_ERG_full_dimer	4.39277	3.89108e-06	0.765048	0.761961	0.038951	0.0379001	9.53366e-06	3209.28
HU0031_ZNF684	4.39379	3.96655e-06	0.781638	0.778639	0.036598	0.036853	5.04217e-06	3223.52
TA0162_GCM1_full_dimer	4.36053	4.5273e-06	0.809624	0.806952	0.0340318	0.0330446	1.13764e-05	3208.45
USF2_HUMAN.H10MO.A	4.35324	4.91328e-06	0.801576	0.798119	0.0411855	0.0429285	3.12699e-06	3238.89
THB_HUMAN.H10MO.C	4.33411	5.28702e-06	0.853207	0.8509	0.0283078	0.0287506	5.65433e-06	3227.24
AJ_GCM1::PITX1_002	4.33239	5.33472e-06	0.813718	0.81152	0.0269325	0.0273928	5.54882e-06	3227.86
AJ_ETV7_003	4.30414	6.06762e-06	0.815568	0.812698	0.0355871	0.03601	6.95783e-06	3225.62
AJ_FLI1::TCF3	4.27703	7.01471e-06	0.851309	0.848797	0.0304173	0.0317439	4.41736e-06	3239.47
MA0076.2 ELK4	4.27557	7.17499e-06	0.890035	0.886709	0.0392378	0.0420743	2.60768e-06	3252.37
MA0144.1 Stat3	4.22284	8.69153e-06	0.886901	0.883688	0.0416081	0.0410493	1.56429e-05	3214.9
TA0464_FOXO4_DBD_multimer	4.17814	1.06952e-05	0.824751	0.821801	0.0384135	0.0381001	1.73315e-05	3217.11
ETS0009 h-Elk4	4.17537	1.13781e-05	0.881177	0.877083	0.0491475	0.0530452	3.79238e-06	3255.59
TA0041_GLI2_DBD_monomer	4.15489	1.15977e-05	0.820029	0.817032	0.0406833	0.0388735	3.49299e-05	3202.14
MA0734.1 GLI2	4.14765	1.19828e-05	0.819801	0.816808	0.0407023	0.0388867	3.60304e-05	3202.09
MA0105.3 NFKB1	4.15078	1.21457e-05	0.883699	0.880563	0.0408928	0.0407727	1.7858e-05	3219.31
AJ_TFAP2C::DRGX	4.1547	1.21807e-05	0.813008	0.810535	0.0311742	0.0321678	9.69087e-06	3234.29
ZKSC1_HUMAN.H10MO.C	4.12998	1.34062e-05	0.73622	0.733505	0.0353046	0.0354984	1.69679e-05	3222.89
MA0475.1 FLI1	4.10734	1.48499e-05	0.904025	0.901296	0.0356217	0.0358691	1.82811e-05	3223.51
MA0595.1 SREBF1	4.10559	1.52261e-05	0.899589	0.896655	0.0372316	0.0386247	1.10437e-05	3236.73
TA0131_ETS1_full_dimer	4.10325	1.5252e-05	0.743368	0.740635	0.0352189	0.0359797	1.45747e-05	3229.81
TA0151_SPDEF_full_monomer	4.09775	1.53482e-05	0.757101	0.754284	0.0374415	0.0370966	2.48565e-05	3216.67
AJ_MYBL1::FIGLA_004	4.09695	1.55986e-05	0.792373	0.789926	0.0318752	0.0322509	1.76531e-05	3225.58
TA0851_RXRG_full_dimer	4.0934	1.59963e-05	0.773374	0.770152	0.0413636	0.0425373	1.35983e-05	3232.76
ETV4_HUMAN.H10MO.B	4.07468	1.71383e-05	0.964509	0.962653	0.0245025	0.0245885	2.22841e-05	3222.04
TLX1_HUMAN.H10MO.S	4.05396	1.85645e-05	0.93129	0.929346	0.0262938	0.0258723	3.33199e-05	3213.82
TA0376_TCF4_full_dimer	4.04837	1.98182e-05	0.955741	0.953917	0.0230417	0.0243616	1.03002e-05	3245.57
MA0739.1 Hic1	4.03059	2.07256e-05	0.915832	0.913229	0.0350136	0.0348632	3.04768e-05	3218.74
TA0050_Hic1_DBD_dimer	4.02512	2.12277e-05	0.915941	0.913344	0.0349747	0.0348198	3.12511e-05	3218.68
MA0473.1 ELF1	4.02228	2.13294e-05	0.882097	0.879347	0.0375277	0.0368825	3.86644e-05	3213.33
AJ_MYBL1::EOMES_002	3.99492	2.50659e-05	0.840869	0.838037	0.0361589	0.0383327	1.26165e-05	3246.85
TA0138_ETV6_full_monomer	3.9736	2.72081e-05	0.891707	0.888655	0.0399477	0.0415061	1.95685e-05	3237.43
MA0645.1 ETV6	3.96968	2.76731e-05	0.891756	0.88871	0.0399105	0.0414686	1.99053e-05	3237.44
ETS0005 h-ELF4	3.96766	2.83508e-05	0.907809	0.905063	0.0349427	0.0374271	1.19792e-05	3251.83
TA0184_IRF8_full_dimer	3.9185	3.18326e-05	0.770206	0.767379	0.0427893	0.0388081	0.000176381	3183.06
MA0652.1 IRF8	3.9185	3.18326e-05	0.770206	0.767379	0.0427893	0.0388081	0.000176381	3183.06
TA0278_RUNX3_DBD_dimer	3.92553	3.31216e-05	0.760368	0.757739	0.0354999	0.036177	3.30103e-05	3228.72
EPAS1_HUMAN.H10MO.D	3.92317	3.42685e-05	0.908532	0.90583	0.0348841	0.037259	1.54874e-05	3250.46
AJ_HOXB2::TCF3_001	3.89394	3.77971e-05	0.81864	0.81613	0.0343376	0.0348073	4.09729e-05	3226.39
AJ_ETV7::TBX21_002	3.89164	3.84655e-05	0.786754	0.784546	0.0297875	0.0306448	3.29068e-05	3232.94
TA0230_PAX5_DBD_monomer	3.86085	4.3931e-05	0.818683	0.816726	0.0265004	0.0273995	3.47636e-05	3235.19
TA0728_RARA_full_dimer	3.85088	4.51831e-05	0.762844	0.760206	0.0367497	0.0369826	5.46698e-05	3223.25
AJ_ETV5::ETV7	3.84728	4.55668e-05	0.795097	0.79248	0.0369357	0.0367056	6.66595e-05	3217.92
AJ_MYCL2	3.84266	4.7426e-05	0.874798	0.871321	0.0472905	0.0488975	3.75705e-05	3235.22
TA0125_ERG_DBD_dimer	3.8268	4.89814e-05	0.78169	0.779013	0.0389218	0.0377175	0.000102894	3207.65
AJ_ERF::FIGLA	3.81107	5.44958e-05	0.822662	0.820031	0.0355878	0.0373173	3.4657e-05	3241.68
AJ_ETV2::FIGLA_001	3.79929	5.61283e-05	0.780051	0.777786	0.0319406	0.0321953	6.59328e-05	3223.95
AJ_TEAD4::ELK1_001	3.78163	5.99949e-05	0.741463	0.739283	0.0312814	0.0311218	8.52341e-05	3218.4
AJ_GCM1::MAX_006	3.74604	7.22866e-05	0.746945	0.744431	0.0335789	0.0363104	2.85417e-05	3256.53
MA0117.1 Mafb	3.74091	7.35369e-05	0.955633	0.95392	0.0231131	0.0247737	3.35756e-05	3252.17
TA0137_ETV6_full_dimer	3.7393	7.42461e-05	0.790331	0.787462	0.0384558	0.0415068	3.031e-05	3255.6
ZN143_HUMAN.H10MO.A	3.71247	8.31347e-05	0.840632	0.838599	0.027221	0.0296418	2.97692e-05	3260.04
MA0080.3 Spi1	3.67801	9.02386e-05	0.870013	0.867753	0.0343814	0.0331239	0.000193764	3205.35
HIC2_HUMAN.H10MO.D	3.68259	9.16616e-05	0.926054	0.923222	0.0402384	0.0415486	7.533e-05	3234.59
TA0143_FLI1_DBD_monomer	3.67621	9.2182e-05	0.790599	0.788004	0.0384736	0.0380929	0.000137278	3216.38
TA0276_RUNX2_DBD_dimer	3.66943	9.46421e-05	0.768308	0.766096	0.0329224	0.0325267	0.000144911	3215.49
AJ_ETV2::FIGLA_002	3.66713	9.86327e-05	0.805629	0.803128	0.0348562	0.0368835	5.64077e-05	3245.97
ETS0025 h-SPIB	3.65065	0.000103988	0.947963	0.946098	0.0268753	0.0276016	9.26007e-05	3232.17
MA0088.1 znf143	3.6532	0.000104518	0.852211	0.850328	0.0262188	0.0278752	5.58691e-05	3248.23
TA0739_RXRA_DBD_dimer	3.63927	0.000108492	0.778089	0.775417	0.0388831	0.0396571	0.000106667	3229.08
TA0219_NFKB1_DBD_dimer	3.6372	0.000110431	0.765969	0.762845	0.0445787	0.0464235	8.05961e-05	3238.48
MA0105.4 NFKB1	3.6372	0.000110431	0.765969	0.762845	0.0445787	0.0464235	8.05961e-05	3238.48
ETS0026 h-SPIC	3.63266	0.000112203	0.945481	0.94361	0.0268534	0.0278254	8.8081e-05	3236.19
AJ_ETV5::FOXO1_001	3.63019	0.000113445	0.864806	0.862783	0.0289875	0.0301164	8.57464e-05	3237.4
ZN784_HUMAN.H10MO.D	3.63005	0.000113913	0.877291	0.874672	0.0372449	0.0390101	7.65376e-05	3241.15
NFKB2_HUMAN.H10MO.D	3.60617	0.000121282	0.909665	0.907755	0.0292494	0.0285671	0.000212671	3210.79
TA0853_E2F1_DBD_monomer	3.60617	0.000121802	0.802867	0.800613	0.0342317	0.0337267	0.000190664	3214.35
NFYB_HUMAN.H10MO.A	3.59139	0.000126717	0.852756	0.849582	0.0502228	0.0476271	0.000319691	3199.25
AJ_TEAD4::FIGLA_002	3.59626	0.000128235	0.792	0.790009	0.0295868	0.029907	0.000142473	3225.17
TA0180_IRF5_full_monomer	3.57486	0.000136609	0.842579	0.840169	0.0376069	0.0363463	0.000270792	3206.6
AJ_MYBL1::FIGLA_002	3.5775	0.000139599	0.801315	0.799186	0.0310551	0.0321605	0.000111192	3235.92
MA0060.1 NFYA	3.56717	0.000139771	0.857486	0.854498	0.0474097	0.0451417	0.000331832	3200.79
BU0089 Tcfe2a_primary	3.55901	0.000150365	0.859039	0.856781	0.0329904	0.0342925	0.00011395	3237.63
BMAL1_HUMAN.H10MO.C	3.519	0.000175476	0.811155	0.808468	0.0398584	0.0412722	0.000140901	3235.87
MA0112.3 ESR1	3.50356	0.000183245	0.766041	0.763506	0.0391828	0.039058	0.000241909	3219.2
TA0732_RARG_DBD_dimer	3.49961	0.000186115	0.775521	0.772959	0.0396267	0.0395211	0.000243937	3219.42
TA0689_ESR1_DBD_dimer	3.49532	0.000189154	0.76593	0.763399	0.0392287	0.0390897	0.000250511	3219.05
AJ_GCM1::FIGLA_006	3.49704	0.000191564	0.800087	0.797895	0.0325148	0.033891	0.00014109	3238.9
TA0093_TFCP2_full_dimer	3.45971	0.000213918	0.790976	0.789021	0.0315363	0.0304631	0.000409298	3206.39
SPI1_HUMAN.H10MO.A	3.44391	0.000229739	0.817212	0.814966	0.0355631	0.0351807	0.000329655	3216.02
AJ_ELK1::SPDEF	3.4443	0.000230329	0.768027	0.765819	0.0346568	0.0346035	0.000295255	3219.9
HU0004_ZNF250	3.42621	0.000249699	0.876621	0.874376	0.034452	0.0353884	0.000224476	3232.24
AJ_TEAD4::EOMES_003	3.39922	0.00027091	0.81168	0.809912	0.0286685	0.0280449	0.000438976	3211.44
MA0525.1 TP63	3.39843	0.000271907	0.826662	0.824653	0.032546	0.031888	0.000432584	3212.08
TA0744_RXRG_DBD_dimer	3.39558	0.000278536	0.776696	0.774155	0.0399649	0.0404017	0.000305322	3225.21
TFE2_HUMAN.H10MO.C	3.39345	0.000281917	0.906275	0.90418	0.0326699	0.033357	0.000273516	3229.57
AJ_TEAD4::EOMES_002	3.37079	0.000305737	0.808425	0.806461	0.0311119	0.0314602	0.000333605	3225.33
AJ_ETV5::EOMES_002	3.35053	0.000330188	0.874335	0.872309	0.0321891	0.0326569	0.000346033	3226.76
AJ_ETV2::SOX15_002	3.33811	0.000345955	0.793793	0.791969	0.0290493	0.029507	0.000357262	3227.29
MA0147.1 Myc	3.30993	0.00038619	0.882201	0.879819	0.037711	0.0388927	0.000332766	3234.06
THB_HUMAN.H10MO.S	3.2997	0.000392431	0.904047	0.901922	0.0355516	0.034727	0.000629223	3210.84
P73_HUMAN.H10MO.A	3.29811	0.000397286	0.809302	0.807315	0.0327684	0.0325118	0.000535848	3217.25
AJ_TFAP4::MAX_001	3.30359	0.000402427	0.786973	0.784595	0.0359186	0.0389402	0.000186355	3257.81
TA0273_Rfx2_DBD_dimer	3.29568	0.000408063	0.763495	0.761012	0.0391768	0.0407071	0.000321923	3237.45
AJ_TEAD4::HES7_001	3.27052	0.000434626	0.795737	0.793886	0.0315906	0.0304983	0.000783277	3206.17
NFYA_HUMAN.H10MO.A	3.26229	0.000444794	0.863055	0.86019	0.0498168	0.0473162	0.000946611	3199.84
TA0741_RXRA_full_dimer	3.22938	0.000514871	0.779349	0.776984	0.0389497	0.0395573	0.000531225	3227.22
SMAD3_HUMAN.H10MO.C	3.21635	0.000543852	0.924716	0.922872	0.0298626	0.030997	0.000438568	3236.98
HAND1_HUMAN.H10MO.D	3.1715	0.00063255	0.899342	0.897563	0.0299169	0.030283	0.000675465	3225.77
AJ_HOXB2::ETV7_002	3.16655	0.000634956	0.827797	0.826343	0.0253881	0.0247723	0.000993362	3210.41
AJ_ERF::MAX	3.1528	0.000682474	0.765243	0.763008	0.0368166	0.0383259	0.000536962	3238.31
TA0116_ELF5_DBD_monomer	3.13559	0.000709143	0.898864	0.896868	0.0351126	0.0343482	0.00107283	3211.43
AJ_MYBL1::FIGLA_001	3.13737	0.00071516	0.802057	0.80014	0.0324066	0.0330063	0.0007143	3228.47
AJ_ETV2::EOMES_003	3.12599	0.000739512	0.770655	0.768811	0.0318366	0.0318421	0.000892386	3220.63
MA0065.2 Pparg::Rxra	3.11535	0.000776201	0.850978	0.84915	0.0307071	0.0317116	0.000669143	3234.66
GMEB2_HUMAN.H10MO.D	3.0994	0.000810866	0.87275	0.870275	0.0431851	0.0430896	0.000999246	3219.62
ETS0017 h-ETV4	3.05109	0.000981463	0.898347	0.896126	0.036658	0.039383	0.000558073	3253.31
MA0092.1 Hand1::Tcf3	3.04543	0.0009856	0.928977	0.927386	0.0275704	0.0282217	0.000935396	3230.69
TA0265_RFX2_DBD_dimer	3.01289	0.00110746	0.750373	0.748095	0.0392259	0.0408702	0.000879733	3238.72
MA0765.1 ETV5	2.97404	0.0012709	0.897771	0.895557	0.0377881	0.0402662	0.000807596	3249.32
TA0136_ETV5_DBD_monomer	2.97277	0.00127632	0.898032	0.895825	0.0376892	0.0401615	0.000811159	3249.33
AJ_TEAD4::SPIB_002	2.96443	0.00128738	0.79271	0.790669	0.0371397	0.0371704	0.00151605	3220.9
TA0117_ELF5_full_monomer	2.94603	0.00136261	0.904603	0.902888	0.0318538	0.0314241	0.00182597	3214.88
MA0136.2 ELF5	2.93814	0.00139897	0.904438	0.902726	0.0318813	0.0314531	0.00187097	3214.9
TA0427_XBP1_DBD_dimer	2.92809	0.00141963	0.803416	0.801107	0.0454502	0.0424804	0.00300563	3193.82
RFX5_HUMAN.H10MO.A	2.92953	0.00146588	0.813725	0.812146	0.0278661	0.0291411	0.00113618	3240.42
AJ_HOXB2::PAX1_001	2.91829	0.00151781	0.777321	0.775644	0.0299452	0.0310664	0.0012728	3236.74
ESR2_HUMAN.H10MO.S	2.91035	0.00155097	0.974297	0.97263	0.0302828	0.0309417	0.00150256	3229.88
MAFK_HUMAN.H10MO.S	2.90175	0.00157267	0.855973	0.853601	0.0451681	0.044087	0.00229254	3210.54
NR1H4_HUMAN.H10MO.C	2.88842	0.00165305	0.820996	0.819067	0.03626	0.0360559	0.00204481	3218.17
YBOX1_HUMAN.H10MO.D	2.88395	0.0016868	0.918248	0.916805	0.0266915	0.0270239	0.00177655	3225.87
AJ_CLOCK::FIGLA_002	2.88619	0.00168969	0.819236	0.817608	0.0291988	0.0304853	0.00133893	3239.67
MA0060.2 NFYA	2.86578	0.00173844	0.795993	0.793926	0.0419007	0.0388179	0.00383018	3190.58
BU0047 Myf6_primary	2.85814	0.0018276	0.847855	0.845991	0.0352386	0.0352134	0.00215718	3220.25
AJ_GCM1::HOXA2	2.84977	0.0018822	0.830166	0.828556	0.0302963	0.0305028	0.00207931	3223.45
AJ_ETV5::EVX1_001	2.8474	0.00190911	0.904586	0.902969	0.0298059	0.0306816	0.00173165	3233.2
AJ_ERF::CLOCK	2.82736	0.00202834	0.785025	0.783422	0.0301563	0.0306098	0.00208498	3226.98
MA0598.2 EHF	2.80758	0.00215097	0.826764	0.824627	0.0411486	0.0410886	0.0025407	3219.94
TA0110_EHF_full_monomer	2.80529	0.00216689	0.826615	0.824477	0.0411816	0.0411282	0.00255543	3220
FOXK1_HUMAN.H10MO.D	2.80023	0.00221968	0.893233	0.891802	0.0268963	0.0276092	0.002069	3231.94
ID4_HUMAN.H10MO.D	2.79546	0.0022472	0.927737	0.925781	0.0372034	0.0377991	0.00228943	3227.4
AJ_ETV5::HOXA2_003	2.78766	0.00229801	0.901743	0.900061	0.0323556	0.0325918	0.00251791	3223.66
AJ_HOXB2::PAX9_002	2.78866	0.0023046	0.781473	0.779832	0.0308959	0.0317947	0.00210271	3233.07
TA0225_PAX1_DBD_monomer	2.78648	0.00232369	0.783773	0.782194	0.02962	0.0306285	0.00203335	3235.24
MA0779.1 PAX1	2.78648	0.00232369	0.783773	0.782194	0.02962	0.0306285	0.00203335	3235.24
TA0139_Elf5_DBD_monomer	2.77906	0.00235072	0.909149	0.907624	0.0298643	0.0296047	0.00293782	3216.89
AJ_MEIS1::ELF1	2.77266	0.0024491	0.847932	0.845868	0.0376599	0.0402698	0.00159136	3251.01
AJ_ETV5::FOXI1_001	2.75624	0.00251011	0.853184	0.851521	0.0335564	0.0325341	0.00372506	3207.85
AJ_GCM2::EOMES	2.73975	0.00268737	0.813602	0.81208	0.0292313	0.0300106	0.00250808	3232.01
TA0114_ELF3_full_monomer	2.69138	0.00309245	0.813794	0.811809	0.0402435	0.0398108	0.0038763	3216.02
TA0113_ELF3_DBD_monomer	2.69054	0.00310301	0.821102	0.819041	0.0416659	0.0413401	0.00380163	3217.25
ETS0023 h-GABPA	2.6865	0.0031987	0.904306	0.902567	0.0329173	0.0349955	0.00223735	3248.21
MA0640.1 ELF3	2.67993	0.00320345	0.813791	0.811813	0.040263	0.0398196	0.0040163	3215.91
ZBT18_HUMAN.H10MO.D	2.67741	0.00321011	0.835301	0.833355	0.0404253	0.0391854	0.00467401	3207.77
RFX1_HUMAN.H10MO.C	2.68059	0.00321742	0.879579	0.877953	0.032342	0.0327478	0.0033617	3225.91
ETS0016 h-ETV3	2.68412	0.0032207	0.89181	0.889844	0.037334	0.039611	0.00229314	3247.24
ETS0002 h-ELF1	2.68176	0.00325255	0.899975	0.898111	0.0350405	0.0375849	0.00211033	3252.52
STAT3_HUMAN.H10MO.A	2.65751	0.00342535	0.905001	0.903225	0.0367024	0.0360481	0.00450556	3213.07
TA0700_HNF4A_DBD_dimer	2.6551	0.0034866	0.796073	0.794404	0.0332395	0.0339418	0.00340779	3229.61
ETS0014 h-ETV1	2.6535	0.00354406	0.901823	0.899998	0.034764	0.0372029	0.00236384	3251.4
TA0082_ZNF75A_DBD_monomer	2.63982	0.00365375	0.828076	0.82614	0.0387441	0.0396077	0.0035404	3230.11
AJ_TEAD4::ELK1_004	2.62457	0.0037735	0.826336	0.824791	0.0327483	0.031752	0.00541066	3207.87
TA0773_PRDM4_full_monomer	2.62605	0.00381208	0.764631	0.76258	0.0411674	0.0421965	0.00361989	3231.29
AJ_ETV2::EOMES_002	2.6203	0.00383594	0.848235	0.846546	0.0354209	0.0347823	0.00501762	3212.98
TA0785_E2F8_DBD_dimer	2.60065	0.00414638	0.781032	0.778986	0.0402004	0.0425369	0.00307418	3245.95
AJ_GCM1::FOXI1_001	2.59583	0.00418232	0.818433	0.816869	0.031548	0.0325686	0.00376436	3234.5
BC11A_HUMAN.H10MO.C	2.58871	0.00418517	0.856389	0.854947	0.0314881	0.0300239	0.00666697	3201.33
MA0865.1 E2F8	2.59266	0.00424654	0.78118	0.779143	0.0401708	0.0424991	0.00315742	3245.88
RARB_HUMAN.H10MO.D	2.58695	0.00426079	0.930437	0.928439	0.0416993	0.0416838	0.00487588	3220.39
AJ_RFX3::ETV7	2.57143	0.0044274	0.737755	0.73634	0.0306065	0.0296714	0.00627021	3207.81
TA0083_ZNF784_full_monomer	2.57577	0.00442952	0.840354	0.838281	0.042545	0.0434757	0.00431008	3229.93
MA0591.1 Bach1::Mafk	2.56885	0.00449261	0.815711	0.813823	0.0398332	0.0396576	0.0052824	3218.69
HU0022_ZBTB18	2.56098	0.00463304	0.964341	0.961732	0.0536294	0.0550297	0.0043734	3231.77
JUNB_HUMAN.H10MO.C	2.52794	0.00497732	0.879765	0.877802	0.0450288	0.0418041	0.00920565	3191.35
AJ_RORB_001	2.53304	0.00500803	0.760086	0.75852	0.0331699	0.0333838	0.00543553	3223.3
AJ_TFAP2C::HOXB13	2.51696	0.00527264	0.782056	0.780652	0.0293948	0.030138	0.0050143	3231.41
TA0759_THRB_DBD_dimer	2.5066	0.00545768	0.750487	0.748829	0.0342183	0.0357543	0.00452758	3240.03
RARG_HUMAN.H10MO.C	2.49968	0.00554075	0.849149	0.847923	0.0259364	0.0265054	0.00539557	3229.96
MA0657.1 KLF13	2.48432	0.00581951	0.771599	0.769851	0.0364577	0.0380295	0.00490164	3239.25
AJ_NR1D2	2.47952	0.00586878	0.795059	0.793421	0.0350574	0.0356872	0.00587332	3228.24
TA0754_Rarg_DBD_dimer	2.47388	0.00595159	0.747532	0.745769	0.0381785	0.0384848	0.00636875	3223.97
TA0051_KLF13_full_monomer	2.47357	0.00600243	0.771589	0.769849	0.036461	0.0380261	0.00506888	3239.16
TA0867_ESRRA_DBD_dimer	2.46329	0.00614844	0.781363	0.779856	0.03247	0.0330271	0.0061862	3227.89
HU0035_ZNF454	2.46457	0.00615748	0.760005	0.75866	0.0283276	0.029493	0.00526897	3238.37
TA0055_PRDM1_full_monomer_dimer	2.4394	0.00642425	0.811327	0.809549	0.042612	0.0392257	0.0120104	3188.29
TA0234_PAX9_DBD_monomer	2.44257	0.00653873	0.759317	0.757842	0.0317592	0.032637	0.00613704	3232.44
MA0781.1 PAX9	2.44257	0.00653873	0.759317	0.757842	0.0317592	0.032637	0.00613704	3232.44
MA0860.1 Rarg.var.2	2.43015	0.00674516	0.747404	0.745672	0.038183	0.0384824	0.00721026	3223.89
BU0029 Hic1_primary	2.42146	0.00690444	0.838827	0.83718	0.0366291	0.0367024	0.00766065	3221.4
MA0080.2 SPI1	2.40959	0.00714097	0.960247	0.958754	0.0333773	0.0334549	0.00789918	3221.54
TA0092_TFCP2_full_dimer	2.40178	0.00716279	0.860635	0.858953	0.0406966	0.0376939	0.0127148	3190.5
AJ_TFAP4::FLI1_001	2.40946	0.00716751	0.774121	0.772388	0.0381574	0.0388326	0.00718395	3228.12
MA0145.3 TFCP2	2.39762	0.00724746	0.8604	0.858719	0.0407615	0.0377499	0.0128498	3190.46
MA0103.1 ZEB1	2.41027	0.00732409	0.996647	0.99599	0.01283	0.0147915	0.00297314	3290.66
RARA_HUMAN.H10MO.C	2.39684	0.00741734	0.821091	0.819713	0.0306833	0.0310429	0.00772234	3225.55
ETS0010 h-ERF	2.39693	0.00747674	0.894851	0.893088	0.0377859	0.0397711	0.00598654	3243.44
BHE41_HUMAN.H10MO.D	2.38366	0.00779547	0.866437	0.86506	0.0290049	0.0312608	0.00531117	3254.89
ETS0007 h-Elk1	2.3822	0.00781313	0.877161	0.87524	0.0408471	0.0436088	0.00568937	3250.24
AJ_ETS2	2.37895	0.00788356	0.86447	0.862417	0.0437457	0.0466832	0.00576213	3250.03
GLI3_HUMAN.H10MO.B	2.37018	0.0079966	0.881945	0.880236	0.0383637	0.0389242	0.00816952	3226.79
TA0632_NKX2-8_DBD_monomer	2.34595	0.00854472	0.955562	0.954413	0.0261641	0.0264298	0.00896688	3224.88
THA_HUMAN.H10MO.C	2.32179	0.00914036	0.820679	0.819419	0.0288861	0.0293122	0.00932197	3226.85
MA0513.1 SMAD2::SMAD3::SMAD4	2.31803	0.0092466	0.857636	0.856042	0.0363913	0.0371594	0.00907605	3229.6
CREM_HUMAN.H10MO.C	2.28198	0.0100562	0.873634	0.872022	0.0398784	0.0380654	0.0144831	3201.75
AJ_CLOCK::NHLH1_002	2.28392	0.0101849	0.786744	0.785392	0.030719	0.0320084	0.00884299	3238.74
MA0502.1 NFYB	2.26312	0.0105425	0.843432	0.841616	0.0460621	0.0432309	0.016503	3195.35
TA0191_SMAD3_DBD_dimer	2.24636	0.0111594	0.820193	0.818333	0.045042	0.0446845	0.0129182	3217.2
MA0795.1 SMAD3	2.24636	0.0111594	0.820193	0.818333	0.045042	0.0446845	0.0129182	3217.2
AJ_E2F3::ONECUT2_002	2.24474	0.0112509	0.752814	0.751521	0.030746	0.0311041	0.0116623	3225.52
AJ_TFAP2C::DLX3_003	2.21315	0.0122294	0.805169	0.804055	0.026923	0.0271739	0.0128284	3224.52
TA0129_ETS1_DBD_dimer	2.20578	0.0124854	0.765969	0.764576	0.0335511	0.0340996	0.0125972	3227.54
TA0224_NRF1_full_dimer	2.19403	0.0129254	0.795905	0.793361	0.0603709	0.0626649	0.0115817	3236.98
ZEP1_HUMAN.H10MO.D	2.16535	0.0138593	0.867525	0.866028	0.0369915	0.0373396	0.014503	3224.56
TA0711_NR2F1_full_monomer	2.15056	0.014478	0.947978	0.946382	0.0385219	0.0401113	0.0127973	3238.43
AJ_ETV2::SREBF2_002	2.13323	0.015182	0.790366	0.789092	0.0304632	0.0322996	0.0121594	3246.92
TA0178_IRF4_full_dimer	2.12154	0.0152292	0.753953	0.752445	0.041721	0.0382589	0.0252367	3186.93
NR2C2_HUMAN.H10MO.A	2.09967	0.0164617	0.850609	0.849216	0.0347529	0.0358465	0.0153717	3234.11
ETV6_HUMAN.H10MO.D	2.066	0.0179094	0.870592	0.868967	0.0413072	0.0425001	0.0169702	3232.98
TA0848_CREB3L1_full_dimer	2.06707	0.0179964	0.764275	0.762744	0.0370953	0.0400806	0.0131752	3256.13
ETS0008 h-Elk3	2.05951	0.0182912	0.876172	0.874463	0.0422887	0.0448961	0.0147438	3247.54
AJ_GCM1::CEBPB_002	2.05803	0.0183027	0.734761	0.733629	0.0285674	0.0297295	0.0163722	3238.17
NKX21_HUMAN.H10MO.D	2.05537	0.0183516	0.93446	0.933481	0.0253248	0.0257118	0.018588	3227.08
MA0258.1 ESR2	2.05194	0.0184285	0.83016	0.829025	0.0301756	0.0298513	0.0211514	3216.02
TA0090_GRHL1_DBD_dimer	2.03102	0.0191687	0.839966	0.838419	0.0444191	0.0409926	0.0298063	3189.19
MLXPL_HUMAN.H10MO.D	2.03505	0.0194527	0.834631	0.833592	0.0258586	0.0276299	0.0152318	3250.65
AJ_ERF::PITX1_002	2.03158	0.0194613	0.804859	0.803718	0.0299326	0.0303309	0.0198917	3226.23
AJ_FLI1::ONECUT2	2.02357	0.0197724	0.784865	0.783797	0.0287892	0.028486	0.0225949	3216.12
IRF8_HUMAN.H10MO.D	2.00939	0.0203545	0.875079	0.873908	0.0328594	0.0314191	0.0270334	3202.41
TA0161_GCM1_DBD_monomer	2.00602	0.0207296	0.865767	0.864443	0.0351052	0.0356352	0.0210013	3227
TA0706_NR2C2_DBD_dimer	2.00009	0.0209216	0.828974	0.8276	0.0377159	0.0370541	0.024618	3213.18
NFIA_HUMAN.H10MO.S	1.99785	0.0211936	0.976518	0.975692	0.0217028	0.022344	0.0200796	3233.27
AJ_ETV5::FOXI1_002	1.99344	0.021342	0.861719	0.860396	0.0356657	0.0358346	0.0226703	3222.57
P73_HUMAN.H10MO.S	1.99174	0.0214568	0.924827	0.923786	0.0278618	0.0282133	0.021983	3225.94
AJ_FOXO1::ELK1_001	1.99131	0.0215618	0.83665	0.835383	0.0331159	0.0343905	0.0196051	3237.2
TA0267_RFX3_DBD_dimer	1.99071	0.0215783	0.758375	0.756849	0.0400549	0.0414046	0.0200619	3235.09
MA0503.1 Nkx2-5.var.2	1.98302	0.021984	0.904263	0.903022	0.0327181	0.0338108	0.0204772	3234.96
TA0185_IRF9_full_trimer	1.97196	0.0221582	0.747779	0.746307	0.0435669	0.0401625	0.0338459	3188.8
MA0653.1 IRF9	1.97196	0.0221582	0.747779	0.746307	0.0435669	0.0401625	0.0338459	3188.8
MA0638.1 CREB3	1.97776	0.0221968	0.801075	0.79968	0.0376376	0.0381021	0.0227624	3225.82
MA0028.1 ELK1	1.97817	0.0222569	0.926261	0.925092	0.030758	0.0319128	0.020347	3236.78
TA0115_ELF4_full_monomer	1.97516	0.0223352	0.820724	0.819126	0.0431805	0.0436905	0.0229579	3225.59
TA0179_IRF5_full_dimer	1.95538	0.0232158	0.793476	0.792231	0.0358927	0.0343293	0.0303931	3202.52
MA0150.2 Nfe2l2	1.95377	0.0233261	0.801615	0.800186	0.0410054	0.03942	0.0298875	3204.5
MA0641.1 ELF4	1.95431	0.0234845	0.820988	0.819408	0.0431666	0.0436624	0.024161	3225.45
RXRB_HUMAN.H10MO.C	1.94708	0.0237685	0.919924	0.918772	0.0326509	0.0319138	0.0283702	3211.1
TA0397_CREB3_full_dimer	1.93798	0.0244241	0.801057	0.79969	0.0376212	0.0380898	0.0250108	3225.87
ZBTB4_HUMAN.H10MO.S	1.92522	0.0253205	0.861804	0.860762	0.0277789	0.0292783	0.0216237	3244.09
BU0036 Irf6_primary	1.8882	0.0271102	0.821684	0.820517	0.0357926	0.0332627	0.0389762	3191.72
TA0453_FOXK1_DBD_multimer	1.88702	0.027361	0.802447	0.800911	0.0453993	0.0439025	0.0337579	3206.82
ETS0027 h-SPI1	1.88595	0.0275991	0.936378	0.935408	0.027545	0.0277576	0.0287916	3223.84
TA0870_CREB3L1_DBD_dimer	1.85581	0.0298908	0.768963	0.767608	0.0363654	0.039503	0.0225273	3258.81
ESR1_HUMAN.H10MO.A	1.84755	0.0300645	0.836801	0.835657	0.0340208	0.0334318	0.0346054	3213.28
MA0608.1 Creb3l2	1.84157	0.0305746	0.878639	0.877153	0.0434057	0.0435866	0.0322934	3222.32
ETS0024 h-SPDEF	1.83959	0.0308047	0.906837	0.90572	0.0319612	0.0328042	0.0297684	3231.89
RARA_HUMAN.H10MO.S	1.83126	0.0313345	0.947182	0.944816	0.0690141	0.0697599	0.0322215	3225.16
NFE2_HUMAN.H10MO.B	1.82124	0.0319611	0.818715	0.81743	0.0385339	0.0380849	0.0358657	3215.65
TA0396_CREB3_full_dimer	1.80791	0.0326406	0.789135	0.787512	0.0520828	0.0483264	0.0459624	3191.15
AJ_GCM2::TBX21_002	1.80775	0.0331942	0.758376	0.757346	0.0295044	0.0307933	0.0300034	3239.5
MA0604.1 Atf1	1.80034	0.0334636	0.882877	0.881276	0.0490856	0.0479668	0.0390842	3211.01
TA0856_YY2_full_dimer	1.79397	0.0342283	0.802268	0.800902	0.0395579	0.0411484	0.0313994	3237.96
ELK1_HUMAN.H10MO.A	1.78854	0.0347078	0.916907	0.915815	0.0313047	0.0330234	0.0300925	3244.5
P63_HUMAN.H10MO.A	1.78011	0.0348695	0.826609	0.825593	0.0324566	0.0307328	0.0454059	3198.68
AJ_TEAD4::HES7_003	1.77427	0.0356293	0.803388	0.80237	0.0307399	0.0309554	0.0371054	3223.54
NR1I3_HUMAN.H10MO.C	1.76848	0.0360233	0.843698	0.842809	0.0273349	0.0271167	0.0396524	3217.18
MA0820.1 FIGLA	1.76155	0.0367447	0.919972	0.918814	0.0345719	0.0354983	0.0355368	3232.07
ETS0018 h-ETV5	1.75673	0.0373082	0.880925	0.879579	0.0388311	0.0414365	0.0310251	3250.01
TA0348_FIGLA_DBD_dimer	1.75355	0.0374026	0.919985	0.918832	0.0345876	0.0355116	0.036193	3232.04
TA0146_GABPA_full_monomer	1.75031	0.0378754	0.868214	0.866792	0.0408762	0.0439676	0.030535	3253.9
ETS0015 h-ETV2	1.7415	0.0385614	0.918672	0.917668	0.0293809	0.0311849	0.0328436	3247.43
AJ_HOXB2::PAX5_001	1.72508	0.0397429	0.801979	0.801078	0.0279564	0.0282212	0.0409471	3224.59
MA0671.1 NFIX	1.72235	0.0399561	0.96819	0.967498	0.0216007	0.0216912	0.0419447	3222.33
HU0016_ZNF669	1.72194	0.0399952	0.700499	0.699474	0.0319848	0.0321418	0.041878	3222.64
HU0007_ZNF189	1.71673	0.0404416	0.909925	0.907836	0.0655254	0.0656875	0.0427006	3221.6
TA0859_NFIX_full_monomer	1.71429	0.0406665	0.968183	0.967493	0.0216283	0.0217182	0.0426782	3222.32
BU0034 Irf4_primary	1.69878	0.041445	0.817776	0.81669	0.0382048	0.0343689	0.061955	3180.26
AJ_FOXO1::ELK1_003	1.70474	0.0416534	0.808134	0.807029	0.0339407	0.035011	0.0396848	3234.14
TA0076_ZNF306_full_monomer	1.70062	0.0419675	0.784679	0.783425	0.0391101	0.0398433	0.0418289	3228.58
MA0144.2 STAT3	1.69495	0.0422669	0.913831	0.912676	0.0376492	0.0367604	0.0487536	3210.67
MA0730.1 RARA.var.2	1.6799	0.0439405	0.760545	0.759386	0.0361856	0.0372544	0.0422027	3233.27
MA0494.1 Nr1h3::Rxra	1.66835	0.0449764	0.834419	0.833545	0.0278708	0.028321	0.0452269	3227.46
AJ_GCM2::PITX1_002	1.66283	0.0453575	0.82452	0.823524	0.0327454	0.0323241	0.0502578	3215.14
TA0283_GMEB2_DBD_dimer	1.64821	0.0467649	0.769696	0.768666	0.0343341	0.0337196	0.0525962	3213.04
TA0726_RARA_DBD_dimer	1.64358	0.0474814	0.760335	0.759201	0.0362196	0.0372885	0.0456726	3233.26
TA0758_THRA_FL_dimer	1.63247	0.0486816	0.748231	0.747171	0.0335891	0.0350762	0.0446246	3239.76
TA0746_Rara_DBD_dimer	1.62726	0.0491304	0.762142	0.761043	0.0355284	0.036474	0.047738	3231.99
CREB3_HUMAN.H10MO.D	1.62363	0.0493503	0.802015	0.800791	0.0407665	0.0406689	0.0526647	3219.54
NF2L2_HUMAN.H10MO.D	1.61139	0.0505957	0.852048	0.850945	0.037299	0.0369566	0.0551188	3216.68
MA0508.1 PRDM1	1.5906	0.0524873	0.841207	0.840197	0.036524	0.0341979	0.0674045	3194.47
TBX20_HUMAN.H10MO.D	1.58919	0.0529695	0.744719	0.743702	0.0349784	0.0345354	0.0582119	3215.22
AJ_HOXB2::ETV7_003	1.5886	0.0530434	0.755296	0.754507	0.0271228	0.0268201	0.0580203	3215.85
MA0028.2 ELK1	1.59136	0.0532197	0.845215	0.843735	0.0465538	0.0502988	0.0436251	3256.11
MA0596.1 SREBF2	1.58744	0.0534698	0.88483	0.883669	0.0378902	0.039521	0.0494001	3239.21
HU0032_ZNF416	1.57302	0.0549201	0.727175	0.726227	0.0321213	0.0325372	0.0557376	3226.08
MA0673.1 NKX2-8	1.56853	0.0553583	0.942676	0.941859	0.0281073	0.0281298	0.0582912	3220.89
AJ_ERF::SREBF2_001	1.56877	0.0555697	0.755152	0.754205	0.0312596	0.0326385	0.0512493	3239.69
TA0633_NKX2-8_full_monomer	1.56539	0.0557151	0.942668	0.941852	0.0281194	0.0281367	0.0586888	3220.81
MA0478.1 FOSL2	1.55813	0.0561633	0.885749	0.884504	0.0457276	0.0430236	0.0705725	3196.28
TA0871_ELK1_DBD_monomer	1.54533	0.0584726	0.84518	0.843744	0.0465778	0.0503059	0.048451	3255.93
GN_IRF8_TOP5000	1.53883	0.0584752	0.855058	0.854117	0.0347506	0.0329504	0.0716129	3199.2
BU0099 Zfp691_primary	1.52135	0.0610739	0.825016	0.823891	0.0389893	0.0399556	0.0598391	3231.2
AJ_TFAP4::MAX_003	1.51916	0.0615828	0.802893	0.801913	0.0326098	0.0348665	0.0529743	3250.97
MA0100.1 Myb	1.50316	0.0631719	0.93268	0.931585	0.0394267	0.0393217	0.0669317	3219.43
TA0111_ELF1_DBD_monomer	1.50031	0.0636267	0.82158	0.820369	0.0430418	0.0435861	0.0645529	3225.95
PRDM1_HUMAN.H10MO.C	1.49365	0.0639057	0.835153	0.834143	0.039157	0.0364074	0.081487	3191.9
AJ_ELF2_001	1.49038	0.0648431	0.855113	0.85406	0.037972	0.0381341	0.0673335	3222.37
MA0473.2 ELF1	1.49	0.064944	0.821477	0.820274	0.0430657	0.0436116	0.0658729	3225.96
AJ_TEAD4::FOXI1_005	1.48526	0.0654938	0.809336	0.808732	0.0218821	0.0219371	0.0683258	3221.62
ZSCA4_HUMAN.H10MO.D	1.47865	0.066289	0.815246	0.813964	0.0471757	0.0468026	0.0711395	3217.21
PPARA_HUMAN.H10MO.C	1.4659	0.0682787	0.833795	0.832732	0.0376195	0.0391855	0.0639502	3238.59
AJ_ELK1::HOXA1_002	1.43064	0.0730464	0.798947	0.797919	0.0377467	0.0388357	0.0709438	3232.97
MA0761.1 ETV1	1.42945	0.0734291	0.878249	0.877165	0.0384916	0.0410254	0.0646639	3249.43
BU0011 Ehf_primary	1.42676	0.0735428	0.873335	0.872487	0.0314422	0.0320852	0.0730229	3229.31
SUH_HUMAN.H10MO.C	1.41073	0.0759731	0.936449	0.935662	0.0289719	0.0301839	0.071403	3238.68
TA0132_ETV1_DBD_monomer	1.41081	0.0760986	0.878059	0.876988	0.038532	0.0410624	0.0672248	3249.36
ZBTB6_HUMAN.H10MO.D	1.39648	0.077888	0.856547	0.855713	0.0317888	0.0322373	0.0785997	3226.58
AJ_ELK1::SREBF2_002	1.38795	0.0795663	0.758493	0.757651	0.0303259	0.0328144	0.0676316	3256.86
GRHL1_HUMAN.H10MO.D	1.37399	0.080729	0.797484	0.79649	0.0414514	0.0389948	0.0972266	3196.22
TA0122_ELK4_DBD_monomer	1.37829	0.0808878	0.87765	0.876563	0.0403342	0.0426492	0.0732941	3245.62
TA0735_RARG_full_dimer	1.36345	0.0828251	0.793928	0.793084	0.0333197	0.0334378	0.0857091	3222.06
MA0828.1 SREBF2.var.2	1.35919	0.0835088	0.83036	0.829221	0.0449433	0.045235	0.0857929	3223.31
TA0668_RHOXF1_full_dimer	1.35872	0.0835885	0.89175	0.890908	0.0332001	0.0334429	0.0857043	3223.66
TA0142_FLI1_DBD_monomer	1.35608	0.0842459	0.891348	0.890365	0.0374971	0.0391857	0.0788702	3240.1
TA0783_E2F4_DBD_dimer	1.34859	0.0848918	0.76783	0.766801	0.0425301	0.0411567	0.0955056	3207.1
MA0156.1 FEV	1.34849	0.0849564	0.940465	0.939326	0.0467981	0.0455769	0.0942035	3209.65
NRF2_NAR	1.34314	0.0859228	0.835231	0.834157	0.0435756	0.0431268	0.0917704	3216.21
MA0104.1 Mycn	1.33681	0.0870527	0.932857	0.931768	0.043738	0.0439868	0.0895367	3222.97
TA0372_SREBF2_DBD_dimer	1.33603	0.0871797	0.830379	0.829259	0.0449761	0.0452481	0.0895894	3223.12
TA0478_Foxk1_DBD_multimer	1.33344	0.0873329	0.791197	0.790169	0.0428627	0.0415736	0.0975445	3208.01
PEBB_HUMAN.H10MO.C	1.33182	0.0876825	0.933556	0.932832	0.0298781	0.0293243	0.0953565	3212.77
TA0774_ZBTB49_DBD_monomer	1.3352	0.0877273	0.768866	0.768061	0.0304683	0.0326299	0.0773481	3251.76
AJ_GCM1::CEBPB_003	1.3322	0.0880433	0.741442	0.740722	0.0279941	0.0291961	0.0829883	3239.17
FOSL2_HUMAN.H10MO.A	1.32	0.0893113	0.878815	0.877735	0.046707	0.0440769	0.105614	3197.4
AJ_FOXO1::ELK3_001	1.31738	0.0902486	0.866514	0.865628	0.0359673	0.0362968	0.0920293	3224.45
MA0159.1 RARA::RXRA	1.31707	0.0902935	0.835179	0.83445	0.0296464	0.0298942	0.092243	3224.11
TA0724_RARA_DBD_dimer	1.30948	0.0916859	0.764727	0.763878	0.0341052	0.0350354	0.0897141	3232.28
MA0490.1 JUNB	1.30212	0.0922008	0.883619	0.882545	0.0475954	0.044426	0.111097	3193.33
AJ_ERF::EOMES_002	1.29738	0.0934819	0.847474	0.846715	0.0318145	0.0315787	0.0988511	3217.42
AJ_HOXB2::ELF1_002	1.29706	0.0935412	0.795136	0.794419	0.0300492	0.0298444	0.0987811	3217.67
AJ_ELK1::EOMES_003	1.27646	0.0971857	0.826554	0.82568	0.036739	0.0369615	0.0996745	3223.13
TA0118_ELK1_DBD_monomer	1.27018	0.0986679	0.86968	0.868626	0.0422204	0.0448812	0.0893939	3248.16
BU0094 Zfp128_primary	1.26597	0.0989659	0.797067	0.796299	0.0328294	0.0327383	0.103397	3219.38
E2F8_HUMAN.H10MO.D	1.26062	0.100493	0.886372	0.885717	0.0259123	0.0281016	0.0869906	3257.98
MA0745.1 SNAI2	1.25241	0.101138	0.953013	0.952177	0.0372692	0.0359795	0.112823	3206.16
TA0058_SNAI2_DBD_monomer	1.2519	0.101229	0.952957	0.952121	0.037306	0.0360113	0.11294	3206.11
IRF2_HUMAN.H10MO.C	1.24771	0.10127	0.85543	0.854571	0.0416507	0.0370044	0.131982	3176.06
TA0190_SRF_full_dimer	1.22506	0.10554	0.744566	0.74364	0.0451772	0.0406184	0.133706	3180.07
MA0083.3 SRF	1.22506	0.10554	0.744566	0.74364	0.0451772	0.0406184	0.133706	3180.07
AJ_ETV5::HOXA13_001	1.22131	0.107107	0.817768	0.817115	0.0289233	0.0288378	0.111668	3219.3
AJ_TEAD4::HES7_004	1.2205	0.107415	0.79684	0.796132	0.0307441	0.0313014	0.107319	3228.31
EHF_HUMAN.H10MO.S	1.21177	0.108837	0.871841	0.871047	0.0358355	0.035395	0.115533	3215.38
TA0695_ESRRG_full_dimer	1.20597	0.110061	0.760934	0.76014	0.0354511	0.0355696	0.113234	3221.97
AJ_ETV2::TBX21_002	1.20463	0.110168	0.86084	0.860084	0.0344424	0.0338867	0.117764	3213.77
AJ_ETV2::FOXI1_004	1.1979	0.111598	0.835535	0.834709	0.0371845	0.0372372	0.115214	3221.15
AJ_GCM1::CEBPB_001	1.19339	0.112236	0.739127	0.738496	0.0293801	0.0285498	0.122689	3208.76
TA0355_MAX_DBD_dimer	1.19461	0.112349	0.752842	0.751945	0.0398658	0.0405305	0.11257	3227.68
TA0852_Bhlhb2_DBD_monomer	1.19198	0.112866	0.864856	0.863779	0.0479299	0.0487697	0.112901	3228.05
HU0003_ZFP3	1.18567	0.11409	0.766396	0.765593	0.0360142	0.0365998	0.114404	3227.5
TGIF1_HUMAN.H10MO.D	1.18494	0.114175	0.85697	0.85642	0.0248217	0.0250282	0.116255	3224.09
AJ_TEAD4::ELF1_001	1.17705	0.115484	0.787136	0.786351	0.0368216	0.0359735	0.124763	3210.91
AJ_ETV5::HOXA13_002	1.1722	0.116544	0.830095	0.829435	0.0307159	0.0303738	0.123066	3215.86
AJ_ETV2::FOXI1_001	1.15557	0.119725	0.836926	0.836192	0.0353394	0.0342288	0.131056	3207.46
AJ_TEAD4::SPIB_001	1.15518	0.11998	0.807956	0.807153	0.0378968	0.0375136	0.126299	3216.29
TA0342_BHLHB3_full_dimer	1.13699	0.123901	0.8583	0.857259	0.048824	0.0494628	0.124934	3226.14
MA0759.1 ELK3	1.12218	0.12736	0.865891	0.864964	0.0419922	0.0446502	0.117383	3248.29
TA0121_ELK3_DBD_monomer	1.11616	0.128637	0.865992	0.865071	0.0419903	0.0446407	0.11868	3248.21
TA0784_E2F4_DBD_dimer	1.1047	0.130477	0.739213	0.738314	0.044836	0.0439145	0.139339	3211.94
AJ_ELK1::ONECUT2_002	1.09776	0.132755	0.731848	0.731193	0.0296805	0.0322665	0.117692	3259.2
NR2C1_HUMAN.H10MO.C	1.08989	0.133958	0.874211	0.873449	0.0373204	0.0377567	0.135319	3225.54
MA0076.1 ELK4	1.09033	0.134195	0.864328	0.863357	0.0455381	0.0482036	0.12515	3246.14
TA0135_ETV4_DBD_monomer	1.07757	0.137035	0.883614	0.882855	0.0359171	0.0381274	0.127313	3247.49
P53_HUMAN.H10MO.B	1.07346	0.137344	0.778992	0.778345	0.0331568	0.0324931	0.146124	3212.16
MA0764.1 ETV4	1.07383	0.137869	0.883512	0.882754	0.0359578	0.0381659	0.128167	3247.43
TA0691_ESRRA_DBD_dimer	1.06669	0.139053	0.749013	0.748321	0.0348881	0.035012	0.142297	3222.06
MA0066.1 PPARG	1.06589	0.139062	0.78397	0.783396	0.0295812	0.0290503	0.147358	3213.02
AJ_HOXB2::ELF1_005	1.05434	0.141902	0.837718	0.837064	0.033161	0.0334748	0.143782	3224.58
TA0763_Vdr_DBD_dimer	1.05448	0.142054	0.786841	0.786195	0.0320351	0.0331301	0.138314	3235.3
BU0035 Irf5_primary	1.03361	0.145962	0.82718	0.826488	0.0389136	0.0360585	0.167908	3190.67
AJ_MYBL1::TBX21	1.0112	0.152094	0.784729	0.784067	0.0345289	0.0353637	0.150601	3230.93
TA0183_IRF8_DBD_dimer	0.998282	0.153956	0.798602	0.797898	0.0426828	0.0379018	0.185832	3175.89
MA0130.1 ZNF354C	0.995583	0.156144	0.994522	0.994301	0.0113035	0.0120339	0.145626	3248.89
TA0755_Rxra_DBD_dimer	0.976896	0.160172	0.804901	0.804196	0.0393929	0.0389716	0.166775	3216.05
AJ_ERF::FOXI1_002	0.97392	0.160915	0.865321	0.864775	0.0305598	0.0302496	0.167389	3216.27
BHE40_HUMAN.H10MO.A	0.969929	0.162156	0.87548	0.874729	0.0409594	0.0418357	0.161296	3229.72
SMAD2_HUMAN.H10MO.C	0.966451	0.163	0.867852	0.867224	0.0344729	0.0350951	0.162906	3228.28
MA0510.1 RFX5	0.960016	0.164697	0.87811	0.877572	0.0294174	0.030269	0.162116	3233.01
BU0060 Smad3_primary	0.95445	0.165678	0.859855	0.859214	0.0371117	0.0361989	0.175573	3210.26
MA0464.2 BHLHE40	0.954859	0.165928	0.859676	0.858821	0.0473954	0.0483168	0.165515	3228.88
AJ_HOXD12::ETV4_002	0.930467	0.171293	0.738033	0.737429	0.0380395	0.0349339	0.195111	3187.45
AJ_HOXB2::NHLH1_003	0.93267	0.171556	0.81089	0.810413	0.0272874	0.0276313	0.172711	3225.93
FOSB_HUMAN.H10MO.C	0.928964	0.171803	0.873595	0.872833	0.047497	0.0441894	0.192619	3192.13
TA0393_CREB3L1_DBD_dimer	0.92591	0.173829	0.777165	0.776523	0.0344554	0.0374826	0.15829	3259.54
MA0083.1 SRF	0.920201	0.174129	0.799465	0.798791	0.0422132	0.0394495	0.193878	3193.77
MA0829.1 Srebf1.var.2	0.920331	0.174758	0.836459	0.835691	0.0445233	0.0450323	0.17618	3225.43
TA0341_BHLHB2_DBD_dimer	0.920135	0.174868	0.859939	0.859118	0.0473281	0.0482309	0.174538	3228.72
ETS0012 h-ETS1	0.918028	0.175546	0.905658	0.905069	0.0334789	0.0346946	0.171313	3236.24
MA0839.1 CREB3L1	0.912237	0.177413	0.777359	0.776728	0.0344104	0.0374361	0.161875	3259.57
MA0477.1 FOSL1	0.9053	0.177801	0.87897	0.878237	0.0479436	0.0435724	0.20387	3183.77
AJ_ELK1::HOXB13_001	0.905016	0.178476	0.768543	0.767979	0.0346162	0.0336423	0.189135	3208.81
AJ_ERF::PITX1_001	0.903435	0.179559	0.815128	0.814634	0.0279209	0.0295728	0.170265	3246.42
TA0300_TBX20_DBD_dimer	0.898616	0.180575	0.774191	0.77362	0.0335937	0.0343006	0.179798	3229.57
TA0373_Srebf1_DBD_dimer	0.895895	0.18123	0.83632	0.835573	0.0445413	0.0450479	0.182658	3225.4
TA0729_RARA_full_dimer	0.891728	0.182604	0.757226	0.756591	0.0367621	0.0384753	0.176094	3240.8
PPARA_HUMAN.H10MO.S	0.863493	0.190108	0.960051	0.959446	0.0371	0.0378658	0.189427	3229.4
ETS1_HUMAN.H10MO.C	0.858424	0.191493	0.938747	0.9383	0.0275929	0.0280995	0.191326	3228.41
TA0750_Rarb_DBD_dimer	0.857561	0.191552	0.763274	0.762672	0.038039	0.0378431	0.196741	3218.38
TA0263_PROX1_DBD_dimer	0.853684	0.192593	0.809322	0.808722	0.0383425	0.0379729	0.198809	3216.49
MA0794.1 PROX1	0.853684	0.192593	0.809322	0.808722	0.0383425	0.0379729	0.198809	3216.49
MA0617.1 Id2	0.850107	0.193768	0.878458	0.877556	0.0565368	0.057286	0.194754	3226.21
TA0119_ELK1_full_monomer	0.843518	0.196019	0.847648	0.846899	0.0448505	0.0480853	0.184039	3252.3
TA0346_Bhlhb2_DBD_dimer	0.842124	0.196067	0.853642	0.852877	0.0480359	0.0490757	0.195164	3229.83
BU0056 Rfxdc2_primary	0.831947	0.199034	0.835318	0.834737	0.0364943	0.0377645	0.195212	3235.58
MA0090.1 TEAD1	0.811137	0.204459	0.864944	0.86436	0.0401804	0.0388267	0.216085	3206.53
MA0622.1 Mlxip	0.798172	0.208438	0.880375	0.879503	0.0594082	0.0589689	0.214018	3217.43
AJ_MYBL1::MAX_002	0.798454	0.208565	0.770164	0.769664	0.03318	0.0338544	0.207966	3229.26
ZN589_HUMAN.H10MO.D	0.794426	0.209585	0.914427	0.914173	0.0172753	0.0172622	0.213666	3220.23
AJ_TEAD4::HES7_002	0.784296	0.212585	0.792484	0.792017	0.0320462	0.0321145	0.216005	3221.46
TA0140_Elk3_DBD_monomer	0.766114	0.218456	0.845644	0.844959	0.0451606	0.0483378	0.207183	3251.49
MA0051.1 IRF2	0.757425	0.219607	0.806447	0.805944	0.0401152	0.035721	0.24838	3176.81
TA0130_ETS1_full_monomer	0.755156	0.221629	0.898463	0.897935	0.0359897	0.037836	0.214419	3242.89
MA0106.1 TP53	0.741849	0.225482	0.743598	0.743167	0.0306379	0.0313643	0.224174	3230.73
MA0039.1 Klf4	0.739332	0.226637	0.955482	0.955179	0.0204609	0.0221826	0.212675	3257.82
PPARG_HUMAN.H10MO.A	0.735452	0.227336	0.832047	0.831658	0.0283058	0.0285675	0.22913	3224.49
TA0717_NR4A2_full_dimer	0.720909	0.231488	0.773397	0.772878	0.0402467	0.0388658	0.242684	3206.27
TA0126_ERG_full_monomer	0.722188	0.231635	0.879101	0.87856	0.0389266	0.040481	0.226929	3237.84
AJ_GCM1::SOX2	0.720151	0.231797	0.77806	0.777633	0.0328008	0.03198	0.240959	3210.09
BU0057 Rxra_primary	0.707873	0.23591	0.864365	0.863909	0.0342629	0.0347146	0.236841	3226.18
AJ_ETV2::ONECUT2_004	0.704814	0.236591	0.769747	0.769342	0.0317348	0.0309637	0.245499	3210.39
AJ_ERF::FOXI1_001	0.701957	0.237949	0.840765	0.840303	0.034176	0.0355573	0.233204	3238.05
AJ_MYBL1::MAX_001	0.698856	0.238614	0.786177	0.785736	0.0341999	0.0340406	0.243297	3218.58
FOS_HUMAN.H10MO.A	0.693936	0.239651	0.879481	0.878931	0.0458053	0.0426647	0.258064	3192.55
MAX_HUMAN.H10MO.A	0.695439	0.239848	0.868732	0.868191	0.0413099	0.0420247	0.23991	3227.95
MA0081.1 SPIB	0.691986	0.24033	0.984707	0.984453	0.021088	0.0197896	0.257188	3195.31
MA0150.1 NFE2L2	0.691994	0.24065	0.866256	0.865736	0.0414491	0.0405283	0.249029	3211.25
TA0631_NKX2-3_full_monomer	0.689323	0.241937	0.921685	0.921243	0.0333352	0.0346801	0.237248	3238.02
MA0672.1 NKX2-3	0.687906	0.242386	0.921829	0.921388	0.0333034	0.0346444	0.237718	3237.99
AJ_ETV2::GSC2_001	0.676816	0.245551	0.749012	0.748639	0.0301445	0.0297382	0.251998	3214.88
TA0444_FOXG1_DBD_multimer	0.67556	0.245721	0.809238	0.808755	0.0402535	0.0385092	0.258459	3202.61
TA0337_ARNTL_DBD_dimer	0.676888	0.245773	0.785109	0.784467	0.0501217	0.0511918	0.245003	3229.7
TA0399_Creb3l2_DBD_dimer	0.67655	0.246177	0.753299	0.752798	0.0374475	0.0400122	0.235872	3250.64
AJ_ETV5::FOXI1_003	0.67346	0.246905	0.844127	0.843748	0.0296215	0.0304034	0.245106	3231.9
ETS0011 h-ERG	0.673735	0.246923	0.894013	0.893549	0.0357452	0.0372744	0.241795	3239.1
TA0089_GRHL1_DBD_monomer	0.672317	0.247129	0.756087	0.755669	0.0333458	0.0335237	0.24965	3222.82
HOMEO0141_Pitx3_3497.2	0.657428	0.251812	0.792571	0.79215	0.034928	0.0345087	0.257852	3215.5
HU0026_ZNF264	0.646174	0.255508	0.754833	0.754421	0.0347048	0.0344352	0.260627	3217.27
AJ_ELF2_002	0.635886	0.25902	0.8413	0.840846	0.0380698	0.0385357	0.260086	3225.77
TA0189_SRF_DBD_dimer	0.629577	0.260774	0.794398	0.79389	0.0449928	0.0434691	0.271072	3206.46
BU0055 Rfx4_primary	0.625445	0.262487	0.827192	0.826714	0.0406518	0.0412721	0.262947	3227.07
ELF3_HUMAN.H10MO.D	0.603087	0.269446	0.871398	0.871021	0.0356772	0.0336986	0.283752	3197.74
NR5A2_HUMAN.H10MO.C	0.600841	0.270754	0.929262	0.928792	0.0412349	0.042196	0.269658	3230.55
AJ_GCM1::FOXO1_002	0.590736	0.274186	0.816785	0.816437	0.0309589	0.0317893	0.272437	3232.08
CREB1_HUMAN.H10MO.A	0.553747	0.286536	0.873112	0.872714	0.0396724	0.0387767	0.293907	3211.1
AJ_NR1I2	0.549814	0.288314	0.851814	0.851502	0.0294043	0.0307366	0.283326	3240.22
TA0128_ETS1_DBD_monomer	0.546108	0.289598	0.885661	0.885263	0.037699	0.0393959	0.284686	3240.09
TA0345_BHLHE41_full_dimer	0.542641	0.290724	0.821153	0.820664	0.0472109	0.0486649	0.288361	3233.82
MA0098.3 ETS1	0.540932	0.291398	0.885497	0.885103	0.0377649	0.0394583	0.286548	3240.01
MA0636.1 BHLHE41	0.530682	0.2949	0.821344	0.820867	0.0471646	0.0486005	0.292634	3233.67
THA_HUMAN.H10MO.S	0.529772	0.294917	0.91486	0.914511	0.0362761	0.035567	0.301518	3212.35
ELK4_HUMAN.H10MO.A	0.530934	0.294952	0.877327	0.876946	0.0367266	0.0388014	0.288135	3245.22
AJ_FOXO1::ELK3_002	0.518978	0.29869	0.839698	0.839336	0.0385636	0.0376455	0.305945	3210.59
PAX1_HUMAN.H10MO.D	0.494096	0.307793	0.783683	0.783395	0.0308273	0.0314477	0.307366	3229.17
AJ_RFX3::SREBF2	0.485591	0.310709	0.761013	0.760741	0.0302988	0.0302053	0.314141	3219.25
AJ_HOXB2::TCF3_002	0.480793	0.312448	0.829099	0.828796	0.0340432	0.0340229	0.315443	3220.3
TA0705_Hnf4a_DBD_dimer	0.480514	0.312643	0.772241	0.771904	0.0372459	0.0378505	0.312864	3227.49
AJ_MYBL1::MAX_003	0.475479	0.314395	0.771507	0.771233	0.0308737	0.0310261	0.316458	3222.65
MA0018.2 CREB1	0.473405	0.314933	0.914994	0.914694	0.0352702	0.0341735	0.322903	3207.59
MA0114.3 Hnf4a	0.470185	0.316367	0.772222	0.771893	0.0372523	0.0378439	0.316642	3227.34
ETV5_HUMAN.H10MO.D	0.466805	0.31747	0.887719	0.887497	0.0257259	0.0255694	0.321285	3217.98
TA0736_RORA_DBD_dimer	0.459028	0.320444	0.721304	0.720987	0.036528	0.0373197	0.319796	3229.84
MA0616.1 Hes2	0.444521	0.32559	0.856797	0.856534	0.0321568	0.0319534	0.329297	3217.88
AJ_GCM1::HOXB13_002	0.435752	0.328859	0.828188	0.827967	0.0272597	0.0273461	0.331055	3221.9
MA0156.2 FEV	0.432411	0.330267	0.879154	0.878827	0.039336	0.0408824	0.326995	3237.56
ETS0013 h-ETS2	0.429392	0.331311	0.901961	0.901677	0.0347885	0.0356648	0.330169	3231.37
AJ_ELK1::FOXI1_002	0.428293	0.331658	0.817348	0.817118	0.028594	0.0289729	0.332306	3226.21
TA0141_FEV_DBD_monomer	0.427902	0.331927	0.879456	0.879133	0.0392684	0.0408025	0.328718	3237.46
AJ_ETV5::DRGX_002	0.423295	0.333554	0.835029	0.834802	0.0283608	0.0290303	0.332659	3230.68
AJ_TBX3	0.418441	0.335398	0.955978	0.955737	0.0301289	0.031153	0.33299	3235.22
TA0124_ERG_DBD_monomer	0.41638	0.336158	0.887435	0.887137	0.0374543	0.0386938	0.333889	3234.83
MA0474.2 ERG	0.411991	0.337786	0.887479	0.887185	0.0374306	0.0386655	0.335551	3234.78
TA0112_ELF1_full_monomer	0.40592	0.340098	0.81585	0.815557	0.0372747	0.0389712	0.336107	3240.31
MA0760.1 ERF	0.396708	0.343567	0.869895	0.869597	0.0384675	0.0405355	0.338502	3243.99
AJ_ETV2::CLOCK	0.395298	0.34387	0.781761	0.781523	0.0323498	0.0324702	0.345818	3222.13
AJ_ELK1::HOXA3_002	0.390935	0.345498	0.875966	0.875743	0.0307131	0.0307924	0.347587	3221.65
TA0123_ERF_DBD_monomer	0.391073	0.345673	0.869935	0.869642	0.0384741	0.0405355	0.340693	3243.91
AJ_PITX1::EOMES_001	0.3898	0.345791	0.81297	0.812743	0.0321821	0.0314076	0.351603	3210.48
AJ_FLI1::MAX	0.389322	0.346241	0.796736	0.79649	0.0329393	0.0340177	0.344144	3234.67
MA0137.1 STAT1	0.384635	0.34744	0.841504	0.841234	0.040865	0.0377372	0.360532	3189.43
AJ_ELK1::TBX21_002	0.354103	0.359436	0.832497	0.832265	0.0349191	0.0352686	0.360403	3224.82
AJ_TEAD4::SPDEF_003	0.346058	0.362293	0.819425	0.819219	0.0333304	0.0321491	0.368979	3205.81
PPARD_HUMAN.H10MO.D	0.341567	0.364326	0.859651	0.859447	0.0310744	0.0322732	0.361733	3237.24
AJ_FLI1::FOXI1_003	0.340657	0.364445	0.845367	0.845131	0.0379873	0.0373638	0.368661	3213.66
IRX2_HUMAN.H10MO.D	0.337265	0.365773	0.856115	0.855967	0.0238347	0.0236052	0.369114	3216.49
AJ_ERF::FOXO1	0.335285	0.366481	0.876242	0.876054	0.0307837	0.0301464	0.371165	3211.88
AJ_GCM1::HOXB13_001	0.319475	0.372728	0.830016	0.829833	0.0302941	0.0309808	0.372134	3230.28
AJ_FOXO1::ETV1	0.316737	0.373718	0.884757	0.884578	0.0302741	0.0304608	0.37504	3223.17
MA0486.1 HSF1	0.309531	0.37639	0.836935	0.83669	0.043474	0.042589	0.380711	3212.02
AJ_GCM2::DRGX_002	0.293818	0.382558	0.802383	0.802221	0.0295557	0.0295873	0.384346	3221.01
AJ_HOXB2::ETV1	0.292639	0.38308	0.831286	0.831071	0.0389015	0.0396374	0.382935	3228.65
TA0757_Rxrb_DBD_dimer	0.282057	0.38709	0.773229	0.773004	0.043319	0.0429043	0.389927	3216.52
AJ_TFAP4::DLX3_003	0.278693	0.388515	0.824536	0.824386	0.0283997	0.0290577	0.387938	3230.49
TA0418_MAFK_full_dimer	0.275962	0.389665	0.81175	0.811574	0.0327828	0.0344236	0.38636	3242.33
AJ_FOXO1::ETV4_001	0.273686	0.390303	0.889566	0.889413	0.0308662	0.0301454	0.394469	3210.78
FOSL1_HUMAN.H10MO.A	0.270097	0.391578	0.884118	0.883893	0.0473275	0.0446851	0.398989	3197.59
AJ_PITX1::HES7_002	0.261853	0.394879	0.823131	0.822993	0.0295872	0.0284742	0.400281	3204.93
TA0428_XBP1_DBD_dimer	0.256997	0.396994	0.796136	0.795958	0.0364871	0.0373758	0.396346	3231.01
AJ_ERF::HOXA3	0.250584	0.399376	0.794969	0.79483	0.0303228	0.029805	0.402623	3213.38
MA0050.1 IRF1	0.247922	0.400135	0.873563	0.873391	0.0411567	0.0373486	0.410439	3183.26
MA0509.1 Rfx1	0.237599	0.404575	0.826088	0.825907	0.0406781	0.0411381	0.405131	3225.37
MA0844.1 XBP1	0.21965	0.411696	0.796299	0.796147	0.0364453	0.0373393	0.411122	3231.08
TA0277_RUNX2_DBD_monomer	0.218171	0.412149	0.884452	0.884292	0.0404383	0.0395592	0.415383	3211.45
MA0511.2 RUNX2	0.218171	0.412149	0.884452	0.884292	0.0404383	0.0395592	0.415383	3211.45
AJ_TFAP4::DLX3_004	0.211536	0.4149	0.795974	0.79585	0.0310163	0.0316916	0.414565	3229.89
TA0731_RARG_DBD_dimer	0.209244	0.415848	0.762399	0.762254	0.0360393	0.0373951	0.414272	3236.82
AJ_HOXB2::ETV4	0.205721	0.417238	0.827023	0.826874	0.0379308	0.0392744	0.415857	3235.85
AJ_RORB_002	0.203267	0.418046	0.732525	0.732401	0.0340015	0.0330641	0.421518	3209.04
FIGLA_HUMAN.H10MO.D	0.190725	0.423099	0.902075	0.901944	0.0373516	0.0371967	0.424666	3218.8
BU0050 Osr1_primary	0.182939	0.426205	0.842598	0.842466	0.0390585	0.0389564	0.427604	3219.45
ERG_HUMAN.H10MO.B	0.182515	0.426537	0.820892	0.82074	0.0421686	0.0452218	0.42277	3252.43
AJ_E2F3::DRGX	0.180537	0.42722	0.799012	0.798885	0.0373722	0.0382084	0.426892	3230.15
AJ_MEIS1::MAX	0.163311	0.434055	0.77614	0.776032	0.0355848	0.0356486	0.435034	3221.31
AJ_ELK1::FOXI1_003	0.161714	0.434694	0.831961	0.831849	0.0372481	0.0373108	0.43567	3221.27
TA0301_TBX20_DBD_dimer	0.161224	0.434823	0.718938	0.718834	0.035829	0.0348057	0.437659	3208.63
RXRA_HUMAN.H10MO.C	0.155188	0.437243	0.823139	0.823052	0.031097	0.0302163	0.439961	3208.73
MA0825.1 MNT	0.14991	0.439441	0.885965	0.885835	0.0465288	0.0470387	0.439817	3225.22
TA0710_NR2F1_DBD_dimer	0.14776	0.440352	0.779413	0.779306	0.0376976	0.0391256	0.439211	3236.93
TA0738_RXRA_DBD_dimer	0.133493	0.445985	0.787656	0.787552	0.0424426	0.0418528	0.447592	3214.71
TA0360_MNT_DBD_dimer	0.130828	0.4471	0.886046	0.885932	0.0464639	0.0469697	0.447434	3225.19
MA0856.1 RXRG	0.127417	0.44842	0.787047	0.786948	0.0428146	0.0419909	0.450216	3212.48
AJ_ETV5::FOXO1_002	0.127331	0.448492	0.872886	0.87281	0.0321263	0.0321987	0.449237	3221.51
MA0141.2 Esrrb	0.126775	0.448729	0.882363	0.882262	0.0427731	0.0432136	0.449081	3224.94
TA0299_TBX1_DBD_dimer	0.125796	0.449063	0.716167	0.71609	0.0338718	0.0330289	0.451109	3210.14
TA0743_RXRG_DBD_dimer	0.125569	0.449165	0.787269	0.787171	0.0427831	0.0419655	0.450928	3212.54
TA0761_THRB_DBD_dimer	0.123978	0.449895	0.742998	0.742916	0.0342913	0.0355504	0.448989	3236.42
MA0475.2 FLI1	0.120165	0.451429	0.86886	0.868765	0.041012	0.042548	0.450518	3236.74
TA0144_FLI1_full_monomer	0.108491	0.456127	0.868951	0.868866	0.0410062	0.0425311	0.455314	3236.63
MA0007.3 Ar	0.103275	0.458139	0.778068	0.777994	0.0399988	0.0388423	0.459983	3208.49
BU0033 Irf3_primary	0.100708	0.459111	0.866648	0.866585	0.0362418	0.0337012	0.462518	3191.94
TA0776_ZNF282_DBD_monomer	0.0909281	0.463204	0.782388	0.782331	0.0328439	0.0339554	0.462637	3235.15
COT2_HUMAN.H10MO.A	0.0797697	0.467688	0.881593	0.88154	0.0351337	0.0355814	0.467835	3225.99
TA0687_AR_full_dimer	0.0694751	0.471811	0.778008	0.777958	0.0400293	0.0388714	0.473056	3208.48
MA0161.1 NFIC	0.0592093	0.476001	0.983279	0.983255	0.0218562	0.0220352	0.476214	3224.04
TA0413_MAFF_DBD_dimer	0.0520664	0.478907	0.780974	0.780938	0.0358583	0.0369175	0.478668	3233.27
BU0051 Osr2_primary	0.0517302	0.479014	0.838625	0.838588	0.0391076	0.0385388	0.479654	3214.44
HU0008_ZNF382	0.0326059	0.486795	0.748032	0.748011	0.0334461	0.0350745	0.486405	3241.72
AJ_TEAD4::ERG_003	0.0233167	0.490552	0.82332	0.823303	0.0367552	0.0379799	0.49041	3234.93
MA0141.1 Esrrb	0.0155425	0.493697	0.882221	0.882208	0.0427767	0.043191	0.493744	3224.68
HU0009_ZNF528	0.00643384	0.497388	0.799462	0.799457	0.0396888	0.0388978	0.497481	3212.2
MA0114.1 HNF4A	0.00467628	0.498104	0.862944	0.86294	0.0351871	0.0357616	0.498106	3227.53
MA0067.1 Pax2	0.0015276	0.49938	0.965901	0.965901	0.0219843	0.0217387	0.499397	3215.85
AJ_FOXO1::ELK1_002	-0.00774699	0.503146	0.844916	0.844922	0.0390823	0.0380497	0.503014	3209.51
AJ_TEAD4::ELK1_002	-0.00917389	0.503718	0.813185	0.813191	0.0333223	0.0343084	0.503761	3233.29
AJ_GCM2::PITX1_001	-0.0114196	0.504629	0.804538	0.804546	0.0341194	0.0349991	0.504665	3231.63
MA0114.2 HNF4A	-0.0157483	0.506386	0.861208	0.861218	0.0348601	0.0353151	0.506358	3226.12
JUND_HUMAN.H10MO.A	-0.0198059	0.508053	0.868179	0.868195	0.0446925	0.0418327	0.507427	3194.35
MA0137.3 STAT1	-0.0407747	0.516544	0.888064	0.888095	0.0407626	0.0402158	0.516057	3214.91
TA0666_RHOXF1_DBD_dimer	-0.0511522	0.520737	0.880753	0.880789	0.0378967	0.0381968	0.520547	3223.92
AJ_TEAD4::FLI1	-0.0644057	0.526113	0.850026	0.850062	0.0304359	0.0303113	0.525576	3218.82
PRD14_HUMAN.H10MO.C	-0.0715031	0.528997	0.843494	0.843536	0.0325329	0.0320146	0.528075	3213.86
FEV_HUMAN.H10MO.C	-0.0836137	0.533913	0.922596	0.922661	0.0433859	0.0421414	0.532424	3208.58
TA0177_IRF3_full_trimer	-0.0942659	0.538265	0.756323	0.756387	0.0390169	0.0366918	0.53546	3196.09
FOXI1_HUMAN.H10MO.B	-0.0952284	0.538624	0.856826	0.856908	0.0486916	0.0468143	0.536566	3204.55
AJ_ERF::TBX21_002	-0.0967597	0.539184	0.845887	0.845949	0.0344305	0.034601	0.538716	3222.66
AJ_ETV2::FOXO6	-0.101191	0.540937	0.834559	0.834624	0.0337437	0.0348408	0.541516	3234.57
DDIT3_HUMAN.H10MO.C	-0.101683	0.541116	0.861456	0.861515	0.0300019	0.0314725	0.542337	3241.87
MA0136.1 ELF5	-0.103109	0.541776	0.946355	0.946404	0.0260881	0.0256513	0.540418	3213.52
ETS0021 h-FEV	-0.114732	0.546375	0.888692	0.888766	0.0334735	0.0349732	0.547567	3239.99
COT2_HUMAN.H10MO.S	-0.115341	0.546657	0.845488	0.845554	0.0306679	0.0312387	0.546703	3228.52
MA0686.1 SPDEF	-0.116072	0.546903	0.843205	0.843288	0.0367159	0.0386768	0.548488	3243.83
ZKSC3_HUMAN.H10MO.D	-0.116393	0.547068	0.855719	0.855805	0.0387916	0.0398476	0.547497	3232.26
AJ_ETV5::CEBPD	-0.121285	0.549047	0.787292	0.787359	0.029327	0.0299241	0.549176	3229.27
TA0769_GMEB2_DBD_dimer	-0.134798	0.554554	0.859794	0.859899	0.0431991	0.0422549	0.552521	3211.4
TA0150_SPDEF_full_monomer	-0.13565	0.554769	0.843058	0.843156	0.0368059	0.038745	0.55658	3243.51
TA0279_RUNX3_DBD_monomer	-0.143822	0.558196	0.868328	0.868434	0.0411847	0.0399967	0.555643	3208.52
AJ_CUX1::NHLH1_002	-0.146829	0.559316	0.737716	0.737802	0.0310159	0.0314923	0.559193	3227.12
AJ_ERF::DLX3_002	-0.154328	0.562234	0.818271	0.818351	0.0263048	0.0279755	0.564918	3248.38
AJ_ELK1::TBX21_004	-0.160607	0.564838	0.865691	0.865788	0.032176	0.0326136	0.564596	3226.36
AJ_ETV2::DRGX_002	-0.16801	0.567828	0.831965	0.832061	0.0308245	0.0308201	0.566698	3220.49
MA0862.1 GMEB2	-0.168456	0.568057	0.859978	0.86011	0.0431175	0.0421691	0.56552	3211.34
TA0702_HNF4A_full_dimer	-0.177999	0.571868	0.784521	0.784659	0.0426639	0.0417847	0.569286	3211.91
MA0691.1 TFAP4	-0.179225	0.572291	0.860449	0.860601	0.0456727	0.0459952	0.571578	3223.56
AJ_TEAD4::ETV7	-0.182694	0.573849	0.743328	0.743426	0.0308311	0.028979	0.568442	3195.9
TA0378_TFAP4_full_dimer	-0.18791	0.575753	0.860173	0.860333	0.0457532	0.0460642	0.574988	3223.45
MA0855.1 RXRB	-0.195511	0.578836	0.776858	0.777013	0.0435731	0.0429008	0.576394	3214.07
AJ_ETV2::PITX1	-0.208245	0.583817	0.791135	0.791259	0.0317044	0.0321447	0.583528	3226.48
AJ_HOXB2::ELK3_002	-0.210289	0.584629	0.798176	0.798308	0.0333187	0.0337558	0.584277	3226.15
TA0742_RXRB_DBD_dimer	-0.222461	0.58953	0.776726	0.776903	0.0436142	0.0429371	0.586759	3214.03
PBX3_HUMAN.H10MO.B	-0.228747	0.592103	0.870007	0.870164	0.0387264	0.0370737	0.586908	3202.88
MA0083.2 SRF	-0.233582	0.594125	0.813021	0.813171	0.0373263	0.0345905	0.586104	3190.69
BU0030 Hnf4a_primary	-0.240485	0.596526	0.852585	0.852736	0.0330735	0.0338419	0.597035	3230.52
CR3L2_HUMAN.H10MO.D	-0.255324	0.602241	0.787844	0.788044	0.0397777	0.0422377	0.606428	3247.63
AJ_ERF::SREBF2_002	-0.261179	0.604729	0.770559	0.770712	0.031789	0.0317295	0.602838	3219.76
MA0518.1 Stat4	-0.267962	0.607489	0.888013	0.888196	0.0378995	0.0367208	0.602625	3207.59
JUN_HUMAN.H10MO.A	-0.271358	0.608905	0.902855	0.90308	0.0472788	0.0447655	0.601734	3198.66
MA0160.1 NR4A2	-0.276035	0.61053	0.943319	0.943468	0.0292177	0.0292017	0.608676	3220.32
IRF3_HUMAN.H10MO.C	-0.276891	0.611141	0.847912	0.848087	0.036647	0.0340661	0.602033	3191.82
AJ_GCM1::FOXI1_002	-0.284062	0.613661	0.82025	0.820441	0.0364046	0.0363481	0.611651	3219.9
TA0854_E2F1_DBD_monomer	-0.286345	0.61478	0.795357	0.795534	0.0354096	0.0333234	0.606625	3196.36
AJ_CUX1::NHLH1_001	-0.289469	0.615767	0.737949	0.73811	0.0299706	0.0298918	0.613608	3219.44
MA0620.1 Mitf	-0.290607	0.616174	0.897521	0.897723	0.0372144	0.0374738	0.615038	3223.52
IRF1_HUMAN.H10MO.A	-0.290119	0.616274	0.801787	0.801978	0.0378694	0.0354289	0.607418	3194.17
TA0686_AR_DBD_dimer	-0.292361	0.616936	0.783727	0.783929	0.0376389	0.0370989	0.613486	3214.52
AJ_CEBPG::CREB3L1	-0.294659	0.617804	0.815486	0.815683	0.0363159	0.0360168	0.614997	3217.08
TA0740_RXRA_full_dimer	-0.29561	0.61819	0.780277	0.780511	0.0433077	0.0427535	0.614876	3215.17
MA0512.2 Rxra	-0.315724	0.62597	0.779874	0.780125	0.0433905	0.0428195	0.622409	3215.01
AJ_FLI1::FOXI1_002	-0.323861	0.628986	0.831336	0.831541	0.0336557	0.0341732	0.628726	3227.12
MA0626.1 Npas2	-0.330509	0.631763	0.900183	0.90044	0.0435198	0.0419047	0.625141	3205.13
TA0377_TFAP4_DBD_dimer	-0.33568	0.63356	0.860621	0.860901	0.0448936	0.0450972	0.631969	3222.48
MA0603.1 Arntl	-0.345532	0.637306	0.866771	0.867081	0.047974	0.0483938	0.636202	3224.28
GCM1_HUMAN.H10MO.D	-0.350945	0.639205	0.888701	0.88891	0.0306364	0.0321426	0.643191	3241.94
AJ_ELK1::TEF	-0.359109	0.642411	0.760114	0.760338	0.0329229	0.0336694	0.64307	3230.28
TEAD4_HUMAN.H10MO.A	-0.361338	0.643434	0.876968	0.877206	0.0362372	0.035612	0.638885	3213.31
XBP1_HUMAN.H10MO.C	-0.362933	0.644057	0.823881	0.824149	0.0407578	0.0399109	0.639025	3211.84
AJ_ELK1::TBX21_003	-0.382127	0.651159	0.725389	0.725589	0.0279469	0.0282323	0.650154	3224.91
TA0858_NFIA_full_monomer	-0.401958	0.658614	0.916549	0.917032	0.0645364	0.0648377	0.656774	3222.54
MA0670.1 NFIA	-0.402189	0.6587	0.916612	0.917095	0.0645639	0.0648653	0.656859	3222.54
MA0484.1 HNF4G	-0.407682	0.660666	0.872463	0.872717	0.0330121	0.0337212	0.661229	3229.76
NR1I2_HUMAN.H10MO.C	-0.408336	0.66096	0.848523	0.84873	0.0270412	0.0273374	0.660004	3225.22
PAX8_HUMAN.H10MO.D	-0.426662	0.667775	0.900527	0.900711	0.0231967	0.0233436	0.666092	3223.25
HU0033_ZNF317	-0.429675	0.66895	0.785152	0.785411	0.0327393	0.0325473	0.665413	3218.08
AJ_ETV2::GSC2_002	-0.43107	0.669694	0.765409	0.765641	0.0304422	0.0290324	0.659961	3201.41
STAT4_HUMAN.H10MO.D	-0.435215	0.671237	0.912164	0.91244	0.03599	0.0342337	0.661042	3200.41
ETS0022 h-Fli1	-0.438968	0.672106	0.883904	0.884207	0.0355807	0.0372549	0.676592	3241
RUNX1_HUMAN.H10MO.A	-0.439356	0.672548	0.905493	0.905812	0.0395471	0.0390617	0.667956	3215.39
HXB1_HUMAN.H10MO.D	-0.440261	0.672996	0.855187	0.855569	0.048335	0.0467584	0.665235	3206.97
MA0605.1 Atf3	-0.460127	0.680144	0.88741	0.887763	0.0418983	0.0413562	0.675273	3215.11
PAX2_HUMAN.H10MO.S	-0.47349	0.684961	0.971346	0.971556	0.0241748	0.0239802	0.680781	3217.16
TA0156_Spic_DBD_monomer	-0.47611	0.685919	0.817388	0.817723	0.0382822	0.0378914	0.681367	3216.25
TA0154_SPIB_DBD_monomer	-0.505496	0.696524	0.820576	0.820935	0.0392896	0.0384022	0.68962	3211.09
MA0600.1 RFX2	-0.510869	0.698246	0.803649	0.804017	0.0385043	0.0388124	0.696596	3223.96
TA0153_SPI1_full_monomer	-0.516908	0.700487	0.794109	0.794492	0.0403646	0.0399841	0.695781	3216.58
HNF4G_HUMAN.H10MO.C	-0.522418	0.702352	0.870049	0.870392	0.0353638	0.0354915	0.699906	3222.09
BU0004 Atf1_primary	-0.534597	0.70692	0.782866	0.783313	0.047048	0.0451096	0.696354	3203.47
MA0080.4 SPI1	-0.538039	0.707909	0.793897	0.794296	0.0403642	0.0400089	0.703177	3216.84
PTF1A_HUMAN.H10MO.C	-0.541679	0.708864	0.863294	0.863552	0.0246441	0.0257409	0.713659	3239.86
AJ_TEAD4::TCF3	-0.552775	0.712964	0.839046	0.839397	0.0341378	0.0342207	0.710201	3221.58
AJ_GCM1::ONECUT2_001	-0.554815	0.713754	0.747596	0.747934	0.0333018	0.0329476	0.708582	3216.07
AJ_HOXB2::PAX1_002	-0.562597	0.716587	0.748496	0.74881	0.0310971	0.0301008	0.70736	3207.21
AJ_CLOCK::TBX3	-0.56988	0.718662	0.792823	0.793202	0.034776	0.0359869	0.721846	3235.58
SRF_HUMAN.H10MO.A	-0.572856	0.719682	0.827619	0.827916	0.0270094	0.0279475	0.72286	3235.55
AJ_ELK1::ONECUT2_001	-0.574639	0.720353	0.775554	0.775852	0.0273772	0.0280444	0.721617	3231.02
AJ_TEAD4::PAX5	-0.585023	0.723788	0.745996	0.746256	0.0230152	0.0239765	0.728324	3238.65
TA0709_NR2F1_DBD_dimer	-0.607651	0.731694	0.786012	0.786492	0.0427048	0.0426401	0.727984	3219.91
TA0134_ETV3_DBD_monomer	-0.621434	0.73594	0.871508	0.871944	0.0359685	0.0379333	0.743126	3244.38
BU0012 Elf3_primary	-0.624218	0.737234	0.896541	0.896907	0.0317444	0.031621	0.732991	3218.91
MA0763.1 ETV3	-0.626418	0.737591	0.871449	0.871889	0.0359812	0.0379494	0.744825	3244.41
MA0592.1 ESRRA	-0.632024	0.739537	0.874483	0.87499	0.041753	0.0433779	0.743733	3237.39
AJ_HOXB2::PAX9_001	-0.631555	0.739709	0.746385	0.74673	0.0298183	0.0295026	0.734093	3216.09
AJ_FOXO1::ELF1_003	-0.633125	0.740433	0.848317	0.84873	0.036566	0.0351591	0.729161	3204.58
AJ_ARNTL::BHLHA15	-0.6371	0.741272	0.749564	0.749958	0.0325265	0.0334608	0.743478	3232.91
HOMEO0143_Pknox2_3077.2	-0.638763	0.742117	0.833558	0.833993	0.0373399	0.0367676	0.735504	3214.11
AJ_TEAD4::FIGLA_001	-0.642244	0.743114	0.831111	0.831543	0.0360988	0.0362929	0.740665	3222.84
MA0137.2 STAT1	-0.650197	0.745614	0.844421	0.844891	0.0382257	0.0389966	0.746131	3229.19
AJ_ETV2::DLX2_001	-0.660575	0.749541	0.773036	0.773413	0.03252	0.0307416	0.734573	3198.05
MA0017.2 NR2F1	-0.669325	0.75188	0.86527	0.8658	0.0423729	0.0427789	0.750238	3224.64
TA0703_HNF4A_full_dimer	-0.669851	0.752053	0.78159	0.78207	0.0383436	0.0386853	0.750273	3224.35
TA0849_NR2F1_DBD_monomer	-0.675714	0.753932	0.865288	0.865823	0.0423953	0.042797	0.752259	3224.59
AJ_GCM1::FOXI1_005	-0.677787	0.754394	0.831648	0.832054	0.0311198	0.0323554	0.758913	3237.74
AJ_FLI1::FOXI1_001	-0.683803	0.756714	0.819188	0.819699	0.0410381	0.0403057	0.74931	3213.06
AJ_FOXO1::FLI1	-0.688675	0.758419	0.827199	0.827656	0.0371446	0.0357452	0.746762	3204.91
ERR3_HUMAN.H10MO.B	-0.689475	0.758475	0.89909	0.899592	0.039792	0.0393051	0.752227	3215.4
NR4A2_HUMAN.H10MO.C	-0.694108	0.759927	0.910815	0.911295	0.0376468	0.0372693	0.754124	3216.33
MA0512.1 Rxra	-0.698159	0.761306	0.911954	0.912419	0.0368156	0.0359635	0.752689	3210.86
AJ_ETV2::HOXA2_001	-0.704408	0.76308	0.808899	0.809323	0.0324581	0.0325389	0.759895	3221.61
AJ_ERF::FOXI1_003	-0.704717	0.763094	0.81663	0.817077	0.0337409	0.0342182	0.762369	3226.59
BU0058 Sfpi1_primary	-0.710168	0.764799	0.905319	0.905736	0.0312776	0.0317304	0.76414	3226.74
TA0692_ESRRA_DBD_dimer	-0.721887	0.768496	0.76909	0.769512	0.0313346	0.0315623	0.766295	3223.64
TA0762_VDR_full_dimer	-0.727835	0.770253	0.777763	0.778229	0.0339641	0.0346028	0.770509	3228.6
MA0693.1 Vdr	-0.73115	0.771275	0.777848	0.778316	0.0339403	0.0345749	0.771509	3228.56
AJ_ETV5::DRGX_001	-0.733808	0.772295	0.81992	0.820374	0.033674	0.0333677	0.766535	3216.72
TA0379_TFE3_DBD_dimer	-0.740158	0.773924	0.877472	0.878007	0.0377754	0.0391003	0.777652	3235.7
MA0093.1 USF1	-0.746891	0.776328	0.914864	0.91556	0.0509577	0.050269	0.769551	3214.87
MA0831.1 TFE3	-0.750818	0.777167	0.877463	0.878006	0.0377751	0.039101	0.780922	3235.71
BU0038 Jundm2_primary	-0.757298	0.779916	0.782534	0.78315	0.0468312	0.0437861	0.761496	3193.94
TAL1_HUMAN.H10MO.S	-0.770866	0.7835	0.828566	0.829177	0.0431092	0.0428019	0.778054	3217.54
MA0607.1 Bhlha15	-0.779595	0.785889	0.926267	0.926881	0.041678	0.0425394	0.786558	3229.41
STAT1_HUMAN.H10MO.S	-0.779665	0.786019	0.846351	0.846882	0.0365909	0.0368024	0.783414	3223.01
AJ_ELK1::HOXA1_001	-0.787448	0.788347	0.775209	0.775748	0.0368925	0.0369608	0.784859	3221.34
AJ_FOXJ2::ELF1_002	-0.788217	0.78884	0.790953	0.791585	0.0446362	0.0432272	0.777821	3207.4
ERR2_HUMAN.H10MO.A	-0.806824	0.793945	0.897529	0.898204	0.0447355	0.0451776	0.792225	3224.76
AJ_PITX1::HES7_001	-0.808039	0.79414	0.795002	0.795449	0.0289701	0.0298842	0.797217	3234.15
AJ_FLI1::DLX2_002	-0.810796	0.795465	0.8404	0.840809	0.0282313	0.0272073	0.783243	3205.48
AJ_FLI1::CEBPB	-0.832662	0.801317	0.759217	0.759716	0.0318719	0.0323279	0.800574	3226.66
TA0845_TBX20_full_dimer	-0.840898	0.803899	0.778183	0.778753	0.0372591	0.0365729	0.795688	3212.82
TBX5_HUMAN.H10MO.D	-0.842886	0.804063	0.935103	0.935627	0.0325406	0.0336263	0.807579	3234.94
MA0476.1 FOS	-0.846645	0.805778	0.88624	0.886953	0.0477144	0.0453711	0.790351	3200.28
NRL_HUMAN.H10MO.D	-0.856543	0.808022	0.890529	0.891073	0.0338066	0.0342601	0.807071	3226.28
AJ_ETV2::HOXA2_002	-0.886725	0.81632	0.792068	0.792568	0.0301911	0.0304702	0.814408	3224.49
JDP2_HUMAN.H10MO.D	-0.901076	0.82072	0.78844	0.789283	0.0533243	0.0503732	0.80353	3197.79
MA0609.1 Crem	-0.902316	0.82083	0.83149	0.83231	0.0505531	0.048994	0.809533	3207.7
MA0035.3 Gata1	-0.909742	0.822662	0.880544	0.881252	0.0425663	0.0419495	0.81522	3214.46
RARG_HUMAN.H10MO.S	-0.90987	0.82296	0.970598	0.971082	0.0299684	0.0286207	0.808252	3201.95
HNF4A_HUMAN.H10MO.A	-0.91559	0.824045	0.845853	0.846453	0.0352357	0.035424	0.821221	3222.82
AJ_GCM2::FOXI1_002	-0.917603	0.824327	0.838049	0.83857	0.0295806	0.0307176	0.829038	3237.18
TA0712_NR2F6_DBD_dimer	-0.920957	0.825216	0.765158	0.765851	0.0392163	0.0406671	0.829604	3236.54
AJ_HOXB2::ELK1_001	-0.940607	0.830562	0.787512	0.788141	0.035996	0.0361133	0.827244	3221.94
SPDEF_HUMAN.H10MO.D	-0.946449	0.83205	0.864742	0.865289	0.0310893	0.0312222	0.828966	3222.37
TA0713_NR2F6_DBD_dimer	-0.950597	0.833169	0.777879	0.778657	0.0443158	0.0441578	0.828254	3219.04
AJ_FOXO1::ELF1_002	-0.95543	0.834372	0.809361	0.809936	0.0324955	0.0324739	0.830134	3220.27
MA0489.1 JUN.var.2	-0.970902	0.838641	0.862076	0.862816	0.043043	0.0410818	0.823655	3201.71
MA0058.3 MAX	-0.972993	0.838801	0.878513	0.87937	0.0476744	0.0475019	0.833866	3219.02
TA0356_MAX_DBD_dimer	-0.973382	0.838899	0.878219	0.879077	0.0477788	0.047601	0.83394	3218.98
TA0694_ESRRG_full_dimer	-0.978582	0.840185	0.763966	0.764554	0.0325233	0.0324159	0.835323	3219.16
AJ_GCM1::ONECUT2_002	-0.981037	0.84078	0.760758	0.761352	0.0327442	0.0326796	0.83623	3219.72
TA0697_Esrra_DBD_dimer	-1.01218	0.848265	0.773663	0.774314	0.0344708	0.0347317	0.84594	3223.77
AJ_FOXO1::ELF1_001	-1.01543	0.849159	0.809414	0.810199	0.0419954	0.0416877	0.84335	3217.46
HU0014_ZNF41	-1.02144	0.850218	0.849674	0.850279	0.0307775	0.0320417	0.85552	3238.34
TA0868_ESRRA_DBD_dimer	-1.02111	0.85047	0.794362	0.794907	0.0288756	0.0287898	0.845688	3219.3
AJ_FOS	-1.01937	0.850497	0.769513	0.770373	0.0480154	0.0454395	0.83349	3198.46
AJ_GCM1::TBX21_002	-1.02785	0.851662	0.743637	0.744155	0.0259438	0.0272583	0.859088	3242.61
TA0688_Ar_DBD_dimer	-1.03169	0.85314	0.798297	0.798996	0.0374366	0.0365149	0.843221	3210.25
MA0491.1 JUND	-1.03532	0.854351	0.872663	0.873486	0.0457516	0.0427978	0.834626	3194.13
AJ_ETV2::DLX3_002	-1.04639	0.856388	0.799677	0.800279	0.0311777	0.0310319	0.851214	3218.58
AJ_HOXD12::ETV1_002	-1.04653	0.856932	0.754493	0.755168	0.0370953	0.0347576	0.837602	3194.74
TA0474_Foxj3_DBD_multimer	-1.05591	0.858823	0.797638	0.798439	0.0423852	0.0408976	0.846393	3205.95
AJ_ETV5::HOXA2_001	-1.06162	0.859831	0.822754	0.823388	0.0322569	0.0322501	0.855709	3220.46
AJ_POU2F1::ELK1_002	-1.08653	0.865553	0.833568	0.834164	0.0302213	0.0296272	0.856874	3212.31
MA0007.2 AR	-1.0903	0.86607	0.862924	0.86365	0.0352546	0.0359575	0.866586	3229.09
BU0020 Gabpa_primary	-1.12046	0.872301	0.820586	0.821418	0.0379062	0.0401565	0.881446	3246.51
AJ_MGA::PITX1	-1.12174	0.873053	0.830211	0.830932	0.0349228	0.0346853	0.86745	3217.68
AJ_ETV2::TEF_001	-1.12901	0.874353	0.720333	0.720924	0.0275957	0.0282468	0.87568	3230.68
TA0745_RXRG_full_dimer	-1.14898	0.878776	0.755057	0.756023	0.0459316	0.0453428	0.871816	3215.16
AJ_PITX1::FIGLA	-1.15542	0.879916	0.819971	0.820685	0.0330451	0.033368	0.878143	3224.72
MA0762.1 ETV2	-1.16294	0.881356	0.848951	0.84979	0.0381834	0.0389756	0.882038	3229.44
AJ_FOXO1::SPDEF	-1.16796	0.882013	0.86804	0.868657	0.0266351	0.0285795	0.89383	3252.7
TA0133_ETV2_DBD_monomer	-1.16872	0.882518	0.848953	0.849796	0.0381805	0.0389726	0.883198	3229.44
AJ_ETV2::GSC2_003	-1.17363	0.883613	0.776459	0.77709	0.0288537	0.0290062	0.880842	3222.8
TA0630_NKX2-3_DBD_monomer	-1.17523	0.883659	0.90041	0.901152	0.0327222	0.0341348	0.889206	3239.27
USF1_HUMAN.H10MO.A	-1.18581	0.88589	0.852733	0.853775	0.0464349	0.0474931	0.887014	3230.33
AJ_ERF::DLX2_001	-1.20721	0.890496	0.82277	0.823441	0.0310673	0.0299244	0.878084	3205.27
AJ_HOXD12::ELK1_001	-1.2246	0.893678	0.768018	0.768799	0.0352471	0.0343815	0.884202	3210.28
MA0858.1 Rarb.var.2	-1.24142	0.8964	0.754039	0.754924	0.0374638	0.0384778	0.898406	3232.19
AJ_FOXO1::ETV4_002	-1.24493	0.897382	0.847858	0.848612	0.0332996	0.0326644	0.88924	3212.55
AJ_FOXJ2::ELF1_001	-1.25089	0.89847	0.855624	0.856399	0.0340966	0.0334121	0.890122	3212.14
MA0514.1 Sox3	-1.25459	0.899253	0.932766	0.933508	0.033022	0.0318854	0.887621	3206.23
TA0747_Rara_DBD_dimer	-1.2581	0.899517	0.761128	0.761994	0.0366999	0.0371835	0.898549	3226.18
TA0714_NR2F6_full_dimer	-1.25765	0.899625	0.798056	0.799019	0.0418051	0.0412903	0.893053	3215.37
TA0751_Rarb_DBD_dimer	-1.27051	0.901624	0.754039	0.754944	0.0374808	0.0384919	0.90358	3232.15
STF1_HUMAN.H10MO.B	-1.27047	0.901783	0.923469	0.924431	0.0407162	0.0408588	0.898733	3222.04
AJ_TEAD4::CLOCK_001	-1.27046	0.901868	0.78233	0.783098	0.0328729	0.0326018	0.89624	3217.07
MA0505.1 Nr5a2	-1.27371	0.902078	0.850378	0.851622	0.0506272	0.0528223	0.907405	3239.35
BCL6B_HUMAN.H10MO.D	-1.27988	0.903498	0.848098	0.849074	0.0413816	0.0411437	0.898446	3218.12
AJ_GCM1::HOXA13	-1.28319	0.903928	0.791328	0.792074	0.0309839	0.0314287	0.903221	3226.68
MA0677.1 Nr2f6	-1.28213	0.903941	0.797719	0.798702	0.0418972	0.0413596	0.897332	3215.15
MA0498.1 Meis1	-1.29078	0.9054	0.864861	0.865754	0.0376459	0.0373335	0.899818	3217.05
AJ_E2F3::ONECUT2_001	-1.29308	0.905673	0.744322	0.745147	0.0341863	0.0344585	0.903613	3223.94
TA0860_NFIX_full_monomer	-1.29416	0.90593	0.966349	0.966972	0.0260257	0.0259717	0.901714	3219.67
ATF2_HUMAN.H10MO.B	-1.29395	0.906163	0.882111	0.88315	0.044914	0.0432611	0.894198	3205.26
TA0281_RUNX3_full_monomer	-1.31402	0.909571	0.877219	0.878156	0.0400541	0.0384264	0.896853	3203.7
MA0684.1 RUNX3	-1.31402	0.909571	0.877219	0.878156	0.0400541	0.0384264	0.896853	3203.7
AJ_ETV2::GSC2_004	-1.32402	0.91058	0.792164	0.792911	0.0290539	0.0304931	0.916954	3242.1
AJ_ETV5::EVX1_003	-1.33018	0.912124	0.80752	0.808262	0.0309745	0.0301005	0.902308	3208.77
MA0017.1 NR2F1	-1.33438	0.912572	0.868671	0.869509	0.0337866	0.0339041	0.909621	3222.03
AJ_TEAD4::FIGLA_003	-1.33419	0.912676	0.828304	0.829224	0.0377729	0.0371967	0.905727	3214.14
MA0656.1 JDP2.var.2	-1.33555	0.913229	0.791227	0.792464	0.0528939	0.0498578	0.896806	3196.97
TA0410_JDP2_full_dimer	-1.34864	0.915315	0.791103	0.792353	0.0529545	0.0499256	0.899055	3197.05
TA0320_TEAD3_DBD_monomer	-1.35458	0.915987	0.933992	0.935053	0.0432734	0.0422399	0.907257	3210.56
MA0808.1 TEAD3	-1.35777	0.916488	0.934033	0.935095	0.0432468	0.0422133	0.907771	3210.55
TA0231_PAX6_DBD_monomer	-1.3623	0.916861	0.784458	0.785176	0.0278269	0.028489	0.918075	3230.76
AJ_ETV2::SOX15_003	-1.36756	0.917917	0.768885	0.769667	0.0312216	0.0308602	0.911888	3215.68
GCR_HUMAN.H10MO.S	-1.38274	0.920031	0.972754	0.973403	0.0249119	0.0253622	0.920101	3228.29
MA0501.1 MAF::NFE2	-1.38204	0.920253	0.802355	0.803389	0.0415202	0.0403207	0.910592	3208.5
TA0181_IRF7_DBD_dimer	-1.38925	0.921737	0.819831	0.820805	0.0409453	0.0377259	0.900901	3188.62
MA0772.1 IRF7	-1.38925	0.921737	0.819831	0.820805	0.0409453	0.0377259	0.900901	3188.62
SPIB_HUMAN.H10MO.B	-1.39133	0.921814	0.891026	0.891994	0.0394909	0.0374855	0.907404	3199.61
TA0420_Mafb_DBD_dimer	-1.40359	0.922995	0.800107	0.800979	0.0323029	0.0336025	0.927292	3237.97
AJ_BACH1	-1.40032	0.923085	0.858329	0.859547	0.0489955	0.0468799	0.91044	3202.67
TA0304_TBX21_DBD_dimer	-1.40958	0.923949	0.753173	0.754158	0.0367521	0.0377538	0.925784	3232.27
TA0753_Rarg_DBD_dimer	-1.41029	0.92405	0.740114	0.741094	0.0365157	0.0375277	0.92597	3232.47
AJ_ETV2::ONECUT2_003	-1.41571	0.925049	0.747757	0.748601	0.0323304	0.0321586	0.920488	3218.31
TA0737_RORA_DBD_dimer	-1.42091	0.92568	0.717715	0.718626	0.0342029	0.0346073	0.924535	3225.6
NR2F6_HUMAN.H10MO.D	-1.43188	0.927246	0.871519	0.872189	0.0249873	0.0252446	0.925814	3224.94
MA0104.3 Mycn	-1.43411	0.927633	0.896933	0.898319	0.0522486	0.0521781	0.923922	3219.98
P63_HUMAN.H10MO.S	-1.43464	0.927728	0.917347	0.918144	0.0301249	0.0299971	0.923443	3218.76
GATA2_HUMAN.H10MO.A	-1.43499	0.927949	0.898361	0.899406	0.0404498	0.0392715	0.91858	3208.4
TA0768_Tp73_DBD_dimer	-1.43787	0.928267	0.790725	0.791676	0.0363122	0.0356891	0.92139	3213.35
AJ_ETV2::SOX15_001	-1.44539	0.929267	0.77537	0.776179	0.0305676	0.0302234	0.923619	3215.81
TA0293_TBX15_DBD_monomer	-1.45653	0.930469	0.89259	0.893795	0.0430047	0.0447148	0.934501	3237.76
MA0803.1 TBX15	-1.45653	0.930469	0.89259	0.893795	0.0430047	0.0447148	0.934501	3237.76
TA0733_RARG_full_dimer	-1.45814	0.930747	0.73464	0.73566	0.0366749	0.0377604	0.932938	3233.3
MLX_HUMAN.H10MO.D	-1.46259	0.931393	0.827207	0.82863	0.0514306	0.0525618	0.932183	3229.98
MA0861.1 TP73	-1.46118	0.931455	0.790529	0.791497	0.0363492	0.0357252	0.924696	3213.34
MA0463.1 Bcl6	-1.46444	0.93186	0.848619	0.849589	0.0361805	0.0357326	0.926072	3215.34
MA0482.1 Gata4	-1.47645	0.933328	0.904258	0.905254	0.0361989	0.036453	0.931329	3223.54
MAFB_HUMAN.H10MO.D	-1.4794	0.933447	0.937518	0.938304	0.0272932	0.0287338	0.939645	3243.55
BU0043 Max_primary	-1.47894	0.933623	0.824534	0.825604	0.0386225	0.0390866	0.932563	3225.68
AJ_HOXD12::ELK3_002	-1.48225	0.934108	0.798902	0.799838	0.0339799	0.034103	0.931479	3222.09
EOMES_HUMAN.H10MO.D	-1.48464	0.934555	0.894185	0.895038	0.0315526	0.0310039	0.927877	3213.25
TA0412_Jdp2_DBD_dimer	-1.48262	0.934575	0.785131	0.786516	0.053355	0.0503045	0.919687	3197.06
MA0643.1 Esrrg	-1.48629	0.934701	0.881957	0.88317	0.044365	0.044047	0.930024	3217.53
SCRT2_HUMAN.H10MO.D	-1.49353	0.935384	0.813223	0.814448	0.0428399	0.0442966	0.938283	3235.23
TA0429_FOXB1_DBD_dimer	-1.49506	0.935608	0.781564	0.782583	0.0357814	0.0368227	0.937641	3233.08
MA0002.2 RUNX1	-1.49422	0.935734	0.904007	0.904941	0.0340411	0.0337275	0.930695	3216.67
TA0696_ESRRG_full_monomer	-1.49589	0.935935	0.882237	0.883455	0.0442526	0.0439359	0.931297	3217.53
BU0077 Spdef_primary	-1.51573	0.938063	0.825952	0.826886	0.0315468	0.0333039	0.944533	3244.86
MA0520.1 Stat6	-1.51199	0.938226	0.871287	0.872368	0.0404363	0.0385574	0.9259	3201.34
TA0155_SPIC_full_monomer	-1.51809	0.938811	0.851344	0.852301	0.0347515	0.0340001	0.931498	3211.49
AJ_TEAD4::ERG_002	-1.52226	0.939226	0.812266	0.813331	0.0380218	0.0377663	0.934773	3217.71
MA0687.1 SPIC	-1.5276	0.939972	0.851372	0.852334	0.0347299	0.0339815	0.932732	3211.52
TA0408_JDP2_DBD_dimer	-1.52824	0.940309	0.777809	0.779228	0.0531772	0.0500243	0.925504	3196.21
MA0469.2 E2F3	-1.53139	0.94061	0.743549	0.744511	0.0355777	0.0338603	0.928112	3200.62
TA0314_TBX5_DBD_monomer	-1.5388	0.940966	0.921613	0.922639	0.0347174	0.0360371	0.944413	3236.99
MA0807.1 TBX5	-1.5388	0.940966	0.921613	0.922639	0.0347174	0.0360371	0.944413	3236.99
AJ_HOXB2::ELF1_003	-1.54753	0.941966	0.82125	0.822118	0.0290087	0.0303069	0.946484	3239.97
AJ_ETV5::DLX2	-1.54649	0.94224	0.807053	0.807951	0.0320842	0.0313372	0.934789	3210.81
TA0106_E2F3_DBD_dimer	-1.54775	0.942555	0.743589	0.744561	0.0355787	0.0338574	0.930207	3200.57
GCR_HUMAN.H10MO.A	-1.55492	0.943155	0.847356	0.848344	0.0346777	0.0342557	0.937833	3215.43
TA0287_MGA_DBD_monomer	-1.56051	0.943492	0.909095	0.910308	0.040288	0.041993	0.947561	3238.89
MA0801.1 MGA	-1.56051	0.943492	0.909095	0.910308	0.040288	0.041993	0.947561	3238.89
TA0075_ZNF238_full_monomer	-1.57198	0.945225	0.854581	0.855781	0.0424461	0.0411405	0.936541	3207.73
TA0074_ZNF238_DBD_monomer	-1.5774	0.945796	0.842531	0.843768	0.0433641	0.0423	0.938319	3210.29
TA0147_SPDEF_DBD_monomer	-1.58287	0.945915	0.832724	0.833865	0.0366243	0.0389921	0.953303	3248.9
MA0009.1 T	-1.58133	0.946103	0.812186	0.813432	0.0426636	0.0425396	0.942556	3219.32
TA0760_THRB_DBD_dimer	-1.58188	0.946129	0.740409	0.741458	0.0356664	0.0357779	0.943638	3221.88
AJ_ETV2::DLX3_003	-1.58378	0.946408	0.812511	0.81342	0.0312147	0.0309513	0.941893	3216.99
TA0286_EOMES_DBD_dimer	-1.58674	0.946502	0.742071	0.743069	0.0328945	0.0339908	0.94904	3234.93
MA0152.1 NFATC2	-1.58425	0.946569	0.959815	0.960834	0.0356071	0.0346728	0.938825	3209.59
ATF3_HUMAN.H10MO.A	-1.58598	0.946669	0.934286	0.935117	0.0286214	0.028298	0.941655	3215.79
MA0698.1 ZBTB18	-1.59278	0.947533	0.854385	0.855601	0.0424819	0.0411819	0.939044	3207.79
AJ_GCM2::TEF	-1.598	0.94784	0.766414	0.76728	0.0288642	0.0292609	0.947174	3226.42
AJ_ETV2::FOXI1_002	-1.61011	0.948832	0.802866	0.803847	0.0306373	0.0329621	0.957593	3254.02
VDR_HUMAN.H10MO.S	-1.625	0.951022	0.985606	0.986287	0.0235799	0.0226021	0.940804	3203.36
TA0292_TBX15_DBD_dimer	-1.62922	0.951266	0.69133	0.692383	0.0352158	0.0348844	0.946784	3216.58
AJ_HOXB2::ELK1_002	-1.64065	0.952276	0.776793	0.777806	0.0327117	0.0333387	0.952492	3228.76
AJ_ERF::DLX2_002	-1.64215	0.952749	0.818735	0.819662	0.0316552	0.0304441	0.943284	3204.67
MA0093.2 USF1	-1.65828	0.954139	0.869216	0.870524	0.0426385	0.0425637	0.951046	3219.81
TFEB_HUMAN.H10MO.C	-1.67342	0.955543	0.842864	0.844663	0.0575137	0.0580543	0.954256	3224.56
MUSC_HUMAN.H10MO.D	-1.69216	0.95716	0.671353	0.672886	0.0471265	0.0489739	0.960241	3237.51
MA0835.1 BATF3	-1.69281	0.957565	0.715828	0.717263	0.0470797	0.0457267	0.950205	3208.56
TA0386_BATF3_DBD_dimer	-1.6937	0.957648	0.716112	0.717548	0.047066	0.0457032	0.950259	3208.47
AJ_CUX1::TBX3	-1.70258	0.958294	0.775755	0.776765	0.0319548	0.0320162	0.955914	3221.37
AJ_ETV2::DLX2_002	-1.71668	0.959577	0.80699	0.807983	0.0312772	0.0312042	0.956589	3219.56
TA0173_HSF4_DBD_trimer	-1.7208	0.95997	0.839414	0.840787	0.0433905	0.0430411	0.95612	3217.15
MA0771.1 HSF4	-1.7208	0.95997	0.839414	0.840787	0.0433905	0.0430411	0.95612	3217.15
AJ_GCM2::SOX15_002	-1.73041	0.960977	0.782742	0.783681	0.0304827	0.0292462	0.95197	3203.73
MA0099.1 JUN::FOS	-1.73247	0.961287	0.931537	0.932726	0.0394831	0.0369598	0.948278	3194.38
MA0122.1 Nkx3-2	-1.73651	0.961321	0.942048	0.942798	0.0234529	0.0232976	0.957758	3217.76
MA0511.1 RUNX2	-1.73537	0.961375	0.86776	0.86888	0.0360629	0.0347717	0.953205	3205.67
AJ_FLI1::BHLHA15	-1.7383	0.961382	0.802265	0.803257	0.0304625	0.030835	0.960591	3225.77
AJ_JUN	-1.74615	0.962276	0.818512	0.820107	0.0509756	0.0492417	0.954495	3206.4
AJ_FOXO1::ETV7	-1.7641	0.963647	0.785233	0.786227	0.0307922	0.030394	0.959266	3215.11
TA0690_ESRRA_DBD_monomer	-1.7772	0.964683	0.877658	0.879101	0.0442674	0.0438217	0.960789	3216.31
AJ_ETV2::GSC2_005	-1.78116	0.964855	0.797624	0.798649	0.0304447	0.0310793	0.965255	3229.49
MA0748.1 YY2	-1.79327	0.965925	0.846619	0.847896	0.038743	0.0384507	0.962466	3217.37
AJ_ETV2::ONECUT2_001	-1.79896	0.966154	0.7755	0.776565	0.0307549	0.0319944	0.968975	3238
TA0064_YY2_DBD_monomer	-1.79774	0.966267	0.846552	0.847833	0.0387393	0.038445	0.96282	3217.35
TA0384_ATF7_DBD_dimer	-1.79825	0.966552	0.779813	0.781415	0.0509133	0.0480123	0.955608	3197.13
AJ_GCM2::SOX15_003	-1.81039	0.967352	0.789365	0.790341	0.0301211	0.0290565	0.959941	3205.85
AJ_ETV2::DLX3_001	-1.81601	0.967496	0.787869	0.788899	0.0298779	0.0306271	0.968406	3231.32
MA0099.2 FOS::JUN	-1.81215	0.967611	0.956144	0.957191	0.0331297	0.0311238	0.956269	3195.71
MA0143.3 Sox2	-1.82374	0.968139	0.914935	0.916836	0.0559002	0.0562904	0.966748	3223.52
AJ_FOXJ3::ELF1	-1.82275	0.968179	0.803221	0.804695	0.0444506	0.0436402	0.963362	3212.9
RFX3_HUMAN.H10MO.B	-1.83147	0.968866	0.819265	0.82068	0.0429928	0.0416649	0.962298	3207.68
MA0834.1 ATF7	-1.83896	0.969525	0.779532	0.781173	0.0510089	0.0480971	0.959086	3197.09
MA0074.1 RXRA::VDR	-1.84923	0.969823	0.803222	0.804421	0.0337333	0.0350338	0.972257	3237.23
TA0407_JDP2_DBD_dimer	-1.85483	0.970523	0.843502	0.845176	0.0505058	0.0486706	0.96337	3205.45
MYB_HUMAN.H10MO.C	-1.87638	0.972001	0.971165	0.972007	0.0253009	0.0241786	0.963906	3202.2
TA0296_TBX1_DBD_dimer	-1.89029	0.97272	0.684833	0.686086	0.035847	0.0357642	0.970322	3219.58
BATF_HUMAN.H10MO.S	-1.91983	0.974715	0.894658	0.896088	0.0418912	0.0401388	0.967414	3203.22
BCL6_HUMAN.H10MO.C	-1.927	0.974987	0.849665	0.850723	0.0297124	0.0296192	0.972612	3219.23
AJ_POU2F1::ETV1	-1.93841	0.975606	0.791438	0.792649	0.0333659	0.0337319	0.974857	3225.23
MA0519.1 Stat5a::Stat5b	-1.94093	0.975778	0.903706	0.905054	0.0373351	0.0374799	0.974247	3222.2
STAT2_HUMAN.H10MO.B	-1.93834	0.975969	0.868111	0.869299	0.0357785	0.0329778	0.963726	3188.75
AJ_GCM2::DLX3_002	-1.95776	0.976744	0.817538	0.81858	0.0286924	0.028742	0.975013	3221.29
TA0866_ESRRA_DBD_monomer	-1.96354	0.977133	0.882566	0.884074	0.042152	0.0414407	0.973312	3213.47
TA0288_MGA_DBD_dimer	-1.96538	0.977142	0.731585	0.732915	0.0362309	0.0365475	0.976185	3224.27
TA0381_Tcf21_DBD_dimer	-1.97106	0.977451	0.796738	0.798288	0.042061	0.0424521	0.976562	3224.51
MA0832.1 Tcf21	-1.97443	0.977635	0.796508	0.798061	0.0421101	0.042494	0.97673	3224.44
MA0106.3 TP53	-1.97851	0.978018	0.753945	0.755198	0.0353966	0.0341271	0.972027	3205.64
BU0049 Nr2f2_primary	-1.98258	0.978061	0.857823	0.859213	0.0373855	0.0378537	0.977518	3225.9
AJ_ARNTL::PITX1_002	-1.98267	0.978133	0.775097	0.776374	0.0350227	0.0347726	0.975506	3217.54
TA0767_Tp53_DBD_dimer	-1.98243	0.978226	0.75381	0.755066	0.0354157	0.0341468	0.972273	3205.66
AJ_HOXB2::TBX3	-1.98705	0.978418	0.836189	0.83752	0.0369571	0.0361406	0.974129	3211.3
TA0303_TBX20_full_monomer	-1.99001	0.978486	0.855258	0.85666	0.0379167	0.0380228	0.976948	3221.74
MA0689.1 TBX20	-1.99001	0.978486	0.855258	0.85666	0.0379167	0.0380228	0.976948	3221.74
MA0059.1 MAX::MYC	-1.99578	0.978654	0.849165	0.850804	0.0424975	0.0443855	0.981128	3239.83
HOMEO0166_Six4_2860.1	-1.99623	0.978662	0.825268	0.82667	0.0361823	0.0379667	0.981564	3242
ATF7_HUMAN.H10MO.D	-1.99668	0.97904	0.795423	0.797272	0.0527295	0.0498947	0.970991	3198.42
MAFG_HUMAN.H10MO.C	-2.01411	0.979706	0.756038	0.757269	0.0328035	0.0330011	0.978548	3223.11
NR4A1_HUMAN.H10MO.C	-2.02004	0.980111	0.924199	0.925678	0.0405617	0.0394734	0.975501	3209.34
MA0665.1 MSC	-2.0226	0.980167	0.863791	0.865251	0.0392338	0.0389681	0.977732	3217.69
MA0515.1 Sox6	-2.02271	0.980227	0.92445	0.925882	0.0390809	0.0381964	0.976101	3211.08
TA0104_E2F2_DBD_dimer	-2.02385	0.980296	0.704044	0.705425	0.0377848	0.0367864	0.975758	3209.51
TA0846_MSC_full_dimer	-2.03412	0.980724	0.863818	0.865286	0.0392145	0.0389493	0.978333	3217.7
AJ_ERF::DLX3_001	-2.04502	0.981211	0.833213	0.834242	0.0270997	0.0271512	0.979712	3221.36
TA0699_HNF4A_DBD_dimer	-2.04865	0.981357	0.783307	0.784656	0.035217	0.0355481	0.980576	3224.56
AJ_MEIS1::EOMES	-2.04787	0.981363	0.890896	0.892197	0.0344372	0.0342913	0.979272	3218.76
MA0007.1 Ar	-2.04963	0.981489	0.818116	0.819163	0.0280699	0.0275586	0.977992	3212.91
TA0316_T_full_dimer	-2.06712	0.982127	0.754869	0.75631	0.036435	0.0376627	0.983464	3235.09
MA0009.2 T	-2.06712	0.982127	0.754869	0.75631	0.036435	0.0376627	0.983464	3235.09
BU0014 Esrra_primary	-2.07191	0.982465	0.848482	0.849951	0.0386349	0.0382736	0.979962	3216.61
AJ_HOXB2::PAX5_002	-2.0968	0.983562	0.756565	0.757669	0.0289415	0.0283865	0.980223	3212.51
AJ_IRF2	-2.0931	0.983703	0.903017	0.904201	0.0339352	0.0303993	0.970491	3178.82
PAX6_HUMAN.H10MO.D	-2.10522	0.983881	0.863266	0.8645	0.0319417	0.0316349	0.981486	3216.5
BU0053 Rara_primary	-2.10699	0.983928	0.839451	0.840916	0.0375552	0.0375323	0.98235	3220.29
MA0106.2 TP53	-2.11383	0.984299	0.806828	0.808247	0.0374037	0.0361871	0.979754	3207
MA0091.1 TAL1::TCF3	-2.13783	0.985162	0.874114	0.875671	0.0395667	0.0393207	0.983186	3217.93
TA0312_TBX4_DBD_monomer	-2.15521	0.985711	0.915345	0.916892	0.0374997	0.0387882	0.986902	3235.38
MA0806.1 TBX4	-2.15521	0.985711	0.915345	0.916892	0.0374997	0.0387882	0.986902	3235.38
TA0056_SCRT1_DBD_monomer	-2.15395	0.985755	0.804502	0.806088	0.0398406	0.0397635	0.984187	3219.73
AJ_ETV2::TEF_002	-2.15983	0.985915	0.762663	0.76397	0.0320401	0.0326729	0.986049	3229.01
AJ_ETV2::DRGX_001	-2.16196	0.986091	0.808439	0.809862	0.0361792	0.0355089	0.983149	3212.78
MA0068.1 Pax4	-2.17334	0.986561	0.801416	0.802439	0.0264966	0.0253897	0.98158	3203.24
MA0743.1 SCRT1	-2.1772	0.986589	0.804392	0.805997	0.0398737	0.0398065	0.985103	3219.84
TA0107_E2F3_DBD_dimer	-2.18669	0.986967	0.705284	0.706791	0.0379826	0.0371756	0.983916	3211.65
HU0002_YY1	-2.20453	0.987227	0.820493	0.82236	0.0401502	0.0459093	0.993737	3286.02
HOMEO0164_Six2_2307.2	-2.20012	0.987372	0.790254	0.791721	0.0360866	0.0359982	0.985886	3219.52
MA0663.1 MLX	-2.20246	0.987431	0.818876	0.820757	0.0458951	0.0461229	0.986505	3222.66
TA0218_NFATC1_full_dimer	-2.20306	0.987474	0.763325	0.765142	0.0446876	0.0444927	0.98585	3218.71
TA0202_PKNOX2_DBD_dimer	-2.2065	0.987567	0.78458	0.786441	0.045354	0.0455302	0.986568	3222.2
MA0783.1 PKNOX2	-2.2065	0.987567	0.78458	0.786441	0.045354	0.0455302	0.986568	3222.2
TA0359_MLX_full_dimer	-2.22086	0.988028	0.819035	0.820931	0.045861	0.0460813	0.987119	3222.59
TA0734_RARG_full_dimer	-2.24342	0.988604	0.759547	0.760966	0.0321426	0.0342033	0.991255	3248.65
MA0065.1 PPARG::RXRA	-2.24927	0.988893	0.77263	0.774213	0.037712	0.0379953	0.988212	3223.75
STAT1_HUMAN.H10MO.A	-2.25555	0.989104	0.773186	0.774563	0.0331105	0.0329593	0.987612	3218.62
TA0204_TGIF1_DBD_dimer	-2.25672	0.98912	0.762545	0.764565	0.0481234	0.0483085	0.988205	3222.19
MA0796.1 TGIF1	-2.25672	0.98912	0.762545	0.764565	0.0481234	0.0483085	0.988205	3222.19
PRGR_HUMAN.H10MO.C	-2.28535	0.989928	0.90226	0.903437	0.0276971	0.0277973	0.989046	3222.09
AJ_ETV2::FOXI1_003	-2.28419	0.989949	0.795561	0.796849	0.0310712	0.0304169	0.987395	3211.73
HSF1_HUMAN.H10MO.A	-2.29137	0.99014	0.828619	0.830457	0.0441438	0.043277	0.98772	3212.32
TA0201_PKNOX1_DBD_dimer	-2.30142	0.99038	0.781396	0.783405	0.0474505	0.0471056	0.988834	3217.48
MA0782.1 PKNOX1	-2.30142	0.99038	0.781396	0.783405	0.0474505	0.0471056	0.988834	3217.48
TA0057_SCRT2_DBD_monomer	-2.30975	0.990574	0.812338	0.814099	0.0409856	0.0411506	0.989756	3222.26
TA0073_ZNF143_DBD_monomer	-2.31628	0.990597	0.791143	0.792755	0.03461	0.037662	0.993879	3259.69
MA0744.1 SCRT2	-2.32494	0.990958	0.812058	0.813833	0.0410597	0.0412159	0.990151	3222.17
MA0088.2 ZNF143	-2.34119	0.991217	0.79093	0.792561	0.0346376	0.0376945	0.994332	3259.72
PPARG_HUMAN.H10MO.S	-2.34276	0.991373	0.924885	0.926334	0.03294	0.0333974	0.991152	3226.48
NKX23_HUMAN.H10MO.D	-2.34995	0.991525	0.889609	0.891191	0.0354989	0.0363596	0.991844	3230.96
CREB5_HUMAN.H10MO.D	-2.36457	0.991997	0.807059	0.809251	0.0525763	0.0499595	0.987883	3200.02
AJ_HOXA3::PAX5	-2.37239	0.992107	0.746533	0.747804	0.0293952	0.0289045	0.990208	3213.54
AJ_ERF::CEBPD	-2.37863	0.992189	0.778775	0.780215	0.032212	0.0326938	0.992036	3226.94
TA0084_ZSCAN4_full_monomer	-2.38159	0.992263	0.790909	0.792637	0.0388333	0.0391819	0.991809	3224.37
NFAC3_HUMAN.H10MO.B	-2.40076	0.992669	0.929481	0.931021	0.034333	0.0346331	0.99222	3224.27
RHXF1_HUMAN.H10MO.D	-2.40102	0.992716	0.908661	0.909986	0.0302744	0.0297695	0.990921	3213.55
TA0212_MYBL2_DBD_dimer	-2.40539	0.992798	0.742891	0.744321	0.0324768	0.032086	0.991276	3215.49
MA0517.1 STAT1::STAT2	-2.40865	0.993041	0.841936	0.843595	0.0413813	0.0370247	0.984999	3178.42
TA0721_Nr2e1_DBD_dimer	-2.42334	0.993102	0.804294	0.805911	0.0352648	0.0360459	0.993284	3230.05
TA0362_Mlx_DBD_dimer	-2.43418	0.993337	0.810705	0.81295	0.0495604	0.0497836	0.992719	3222.47
TAL1_HUMAN.H10MO.A	-2.44468	0.993555	0.823733	0.825317	0.0352958	0.0349485	0.992259	3216.41
NKX32_HUMAN.H10MO.C	-2.44697	0.993564	0.903202	0.904596	0.0303893	0.0307742	0.99333	3225.96
AJ_ETV2::BHLHA15	-2.45986	0.99381	0.781608	0.783072	0.0320295	0.0321274	0.993159	3221.85
BMC_TATA_box	-2.45729	0.993888	0.841883	0.843249	0.0323113	0.0299281	0.988887	3190.51
MA0841.1 NFE2	-2.47057	0.99408	0.817901	0.820026	0.0488402	0.0463424	0.990642	3199.47
COT1_HUMAN.H10MO.S	-2.47849	0.994132	0.855808	0.857531	0.0373642	0.0375213	0.993556	3222.34
TA0203_Pknox2_DBD_dimer	-2.4829	0.994212	0.769987	0.77223	0.0487434	0.0487667	0.993479	3220.76
AJ_HOXB2::ELF1_004	-2.48442	0.994215	0.828081	0.829506	0.0304446	0.0309723	0.994185	3227.97
MA0095.1 YY1	-2.48768	0.994367	0.991865	0.992539	0.0153979	0.0146052	0.991024	3199.33
AJ_TEAD4::ETV1	-2.4935	0.994376	0.855181	0.856645	0.0314223	0.0317009	0.99401	3224.33
AJ_TEAD4::ETV4	-2.49777	0.994456	0.806114	0.80784	0.0372667	0.0372908	0.993753	3220.83
AJ_FLI1::HOXB13_002	-2.50905	0.994687	0.750446	0.751984	0.0343341	0.0330423	0.992228	3204.92
TA0722_Nr2f6_DBD_dimer	-2.51917	0.99477	0.765993	0.768017	0.0426504	0.0433994	0.994751	3228.07
TA0422_NFE2_DBD_dimer	-2.51402	0.994784	0.817756	0.81992	0.0489029	0.0463823	0.991611	3199.3
MA0728.1 Nr2f6.var.2	-2.52686	0.994887	0.766136	0.768166	0.0426423	0.0433902	0.994867	3228.06
AJ_GCM1::HOXB13_004	-2.54243	0.995132	0.804344	0.805794	0.0306684	0.030774	0.9946	3222.01
AJ_RFX3::SRF	-2.53634	0.995146	0.78162	0.782836	0.0278311	0.0258116	0.990932	3190.98
TA0170_HSF1_DBD_trimer	-2.54639	0.995192	0.826726	0.828744	0.0427403	0.0427811	0.99457	3220.96
AJ_CUX1::TBX21_002	-2.55101	0.995201	0.842935	0.844491	0.0313515	0.0329815	0.996241	3243.2
AJ_HOXD12::ETV1_001	-2.57833	0.99567	0.754805	0.756432	0.0353047	0.03402	0.993598	3205.43
TA0310_TBX2_full_dimer	-2.58794	0.995735	0.761274	0.762996	0.0353829	0.0359284	0.99565	3227.14
MA0058.1 MAX	-2.59331	0.995813	0.888548	0.89071	0.0447251	0.0449964	0.995425	3223.13
TEAD1_HUMAN.H10MO.D	-2.59868	0.995956	0.87842	0.879918	0.0330487	0.0310461	0.992856	3195.7
AJ_ETV2::FOXI1_005	-2.6221	0.996115	0.80087	0.802502	0.0319036	0.0336622	0.997066	3244.6
TBX19_HUMAN.H10MO.D	-2.62386	0.99614	0.718037	0.7197	0.0326387	0.0342734	0.996971	3242.35
IRF7_HUMAN.H10MO.C	-2.61536	0.996192	0.927099	0.928581	0.0335105	0.030486	0.991644	3184.13
AJ_TEAD4::MAX_001	-2.63134	0.996247	0.797197	0.799004	0.0361301	0.0371033	0.996489	3232.13
AJ_FLI1::DLX2_001	-2.63142	0.996274	0.846376	0.847854	0.0303506	0.0303085	0.995685	3219.97
HSF2_HUMAN.H10MO.A	-2.63428	0.996322	0.808703	0.810752	0.0426699	0.0419598	0.995226	3213.56
MA0526.1 USF2	-2.64986	0.996488	0.882089	0.884168	0.0428556	0.0423307	0.995577	3215.4
MA0871.1 TFEC	-2.66663	0.996614	0.902814	0.904443	0.0315968	0.033025	0.997258	3240.17
AJ_HOXB2::TBX21_002	-2.66228	0.996657	0.765729	0.767206	0.0314731	0.0298922	0.994389	3199.83
TA0847_TFEC_DBD_dimer	-2.67087	0.996658	0.902863	0.904495	0.0316025	0.0330351	0.997298	3240.23
AJ_FLI1::DRGX	-2.69074	0.996893	0.789696	0.791317	0.0325621	0.032513	0.996376	3219.91
TA0409_JDP2_full_dimer	-2.69242	0.996941	0.838891	0.841386	0.051898	0.0499692	0.995302	3205.11
TA0206_TGIF2_DBD_dimer	-2.73529	0.997296	0.791073	0.793345	0.0449582	0.0448409	0.996803	3219.45
MA0797.1 TGIF2	-2.73529	0.997296	0.791073	0.793345	0.0449582	0.0448409	0.996803	3219.45
ZN282_HUMAN.H10MO.D	-2.74564	0.997379	0.875031	0.876389	0.0266369	0.026686	0.997007	3221.34
TA0302_TBX20_DBD_monomer	-2.74607	0.99738	0.825054	0.826949	0.0370293	0.0372702	0.997118	3223.32
TA0297_TBX1_DBD_monomer	-2.74935	0.997383	0.892503	0.894852	0.0443904	0.0461706	0.997815	3237.91
MA0805.1 TBX1	-2.74935	0.997383	0.892503	0.894852	0.0443904	0.0461706	0.997815	3237.91
MA0655.1 JDP2	-2.74294	0.997388	0.838917	0.841459	0.0518848	0.0499491	0.995922	3205.05
AJ_HOXB2::EOMES_002	-2.75341	0.997421	0.8517	0.853209	0.0286449	0.0296098	0.99773	3235.09
AJ_TEAD4::ELK1_003	-2.76031	0.997482	0.796305	0.798212	0.0364303	0.0373198	0.997608	3231.04
MA0647.1 GRHL1	-2.75579	0.997506	0.813278	0.815416	0.0442264	0.0417962	0.995506	3197.94
TA0091_GRHL1_full_dimer	-2.76321	0.997564	0.81347	0.815611	0.0441805	0.0417456	0.995592	3197.88
TBX4_HUMAN.H10MO.D	-2.81831	0.997909	0.735743	0.737576	0.0344287	0.0351301	0.997947	3229.28
TA0205_TGIF2LX_full_dimer	-2.83034	0.997996	0.785828	0.788188	0.0447059	0.0450262	0.997795	3223.6
MA0100.2 Myb	-2.838	0.998035	0.90857	0.910569	0.0371507	0.0380399	0.99813	3230.83
AJ_POU2F1::ELK1_001	-2.83515	0.998039	0.805683	0.807407	0.0332585	0.0328046	0.997422	3214.81
AJ_GCM2::FOXI1_001	-2.84245	0.998091	0.824192	0.826283	0.0406424	0.0396783	0.997261	3210.63
GATA1_HUMAN.H10MO.A	-2.85199	0.998137	0.816055	0.817862	0.0342998	0.0341887	0.997754	3219.18
TA0291_TBR1_full_monomer	-2.86176	0.998198	0.828844	0.831023	0.0414544	0.0410916	0.997719	3216.86
AJ_GCM1::FOXI1_003	-2.86683	0.998233	0.821698	0.823624	0.0368881	0.0362314	0.997578	3213.08
TA0063_YY1_full_monomer	-2.87673	0.998271	0.89232	0.893908	0.0293171	0.0298165	0.998252	3227.84
TA0421_Mafb_DBD_dimer	-2.90232	0.998444	0.77422	0.776029	0.0353215	0.0335924	0.997176	3200.34
HOMEO0015_Crx_3485.1	-2.91347	0.998475	0.795087	0.796977	0.0350152	0.0350339	0.998209	3220.78
TA0723_Nr2f6_DBD_dimer	-2.91965	0.998515	0.77829	0.78059	0.0433279	0.0424911	0.997914	3212.45
TA0308_TBX21_full_monomer	-2.9326	0.998562	0.856358	0.858619	0.0410154	0.0416541	0.998525	3227.21
MA0690.1 TBX21	-2.9326	0.998562	0.856358	0.858619	0.0410154	0.0416541	0.998525	3227.21
TA0411_Jdp2_DBD_dimer	-2.93974	0.998617	0.827542	0.830339	0.052936	0.0513045	0.997834	3207.7
AJ_GCM2::DRGX_001	-2.94881	0.998625	0.809684	0.811354	0.0292835	0.0306025	0.99893	3240.1
AJ_ERF::HOXB13	-2.94695	0.998648	0.834127	0.835891	0.0331673	0.0322766	0.997953	3209.33
NDF2_HUMAN.H10MO.D	-2.95303	0.998654	0.904216	0.905571	0.0242884	0.0247823	0.99868	3229.26
AJ_HOXD12::ETV4_001	-2.96635	0.99874	0.751626	0.753591	0.0372735	0.0357106	0.9978	3203.18
AJ_TEAD4::CLOCK_004	-2.97102	0.998747	0.793094	0.794753	0.0305205	0.0301173	0.998317	3214.99
MA0840.1 Creb5	-2.97134	0.998765	0.809989	0.812674	0.051275	0.0486867	0.997665	3199.73
PRGR_HUMAN.H10MO.S	-2.97968	0.998785	0.980265	0.981374	0.0204497	0.0200797	0.998289	3212.96
HOMEO0028_Duxl_1286.2	-2.98365	0.998794	0.800949	0.802888	0.0351389	0.0350835	0.998544	3219.89
TA0401_Creb5_DBD_dimer	-2.9814	0.998806	0.810194	0.812883	0.0511981	0.0485981	0.997728	3199.61
MA0035.2 Gata1	-2.99061	0.998832	0.909564	0.9117	0.0395187	0.0385292	0.998241	3210.08
TA0208_MYBL1_DBD_dimer	-2.99438	0.998843	0.792665	0.7948	0.0390738	0.0384664	0.998404	3214.02
MA0776.1 MYBL1	-2.99438	0.998843	0.792665	0.7948	0.0390738	0.0384664	0.998404	3214.02
MA0050.2 IRF1	-3.00046	0.998878	0.81207	0.814276	0.0414721	0.0396275	0.997971	3202.15
MA0141.3 ESRRB	-3.00483	0.998884	0.843546	0.84625	0.0494727	0.0485579	0.998415	3212.79
TA0298_TBX1_DBD_dimer	-3.0362	0.998975	0.700823	0.702563	0.0295195	0.0309786	0.999247	3242.05
BU0037 Isgf3g_primary	-3.02189	0.998975	0.816944	0.819112	0.0422204	0.0385906	0.997254	3185.77
TA0693_ESRRB_DBD_monomer	-3.03516	0.998994	0.84346	0.846192	0.0494723	0.0485553	0.99856	3212.77
TA0210_MYBL1_DBD_dimer	-3.07335	0.999107	0.796438	0.798053	0.0279532	0.0283677	0.999075	3226.89
AJ_TEAD4::EOMES_001	-3.07755	0.999129	0.824261	0.826152	0.0336674	0.0331594	0.998784	3214.21
HSF4_HUMAN.H10MO.D	-3.08345	0.999153	0.79862	0.801215	0.0469822	0.0453657	0.998568	3206.24
ATF1_HUMAN.H10MO.B	-3.09093	0.999177	0.899563	0.901479	0.0347975	0.0333994	0.998523	3203.89
MA0692.1 TFEB	-3.10052	0.999184	0.870125	0.872537	0.0409103	0.042038	0.999257	3232.41
TA0380_TFEB_full_dimer	-3.10805	0.999205	0.870136	0.872555	0.0409202	0.0420576	0.999279	3232.51
TA0294_TBX19_DBD_dimer	-3.11181	0.999212	0.735456	0.737475	0.033697	0.0350811	0.999377	3238.34
MA0804.1 TBX19	-3.11181	0.999212	0.735456	0.737475	0.033697	0.0350811	0.999377	3238.34
AJ_TEAD4::CLOCK_002	-3.11578	0.999234	0.782548	0.7844	0.0321739	0.0320764	0.999047	3219.27
AJ_TEAD4::PITX1_004	-3.12049	0.999253	0.813905	0.815724	0.0321944	0.0314402	0.998855	3210.75
BRAC_HUMAN.H10MO.D	-3.15306	0.999319	0.687653	0.689443	0.0295464	0.0306808	0.999449	3237.16
AJ_FLI1::HOXB13_001	-3.16508	0.999358	0.836166	0.837876	0.0294444	0.029148	0.999134	3216.31
RUNX3_HUMAN.H10MO.C	-3.16614	0.999364	0.897844	0.900087	0.039193	0.0382222	0.999	3210.19
TA0313_TBX4_DBD_dimer	-3.17652	0.999376	0.742685	0.744775	0.0346957	0.0355457	0.999415	3231.07
TA0196_MEIS3_DBD_dimer	-3.17882	0.999386	0.81296	0.815434	0.0419228	0.0420179	0.999271	3221.52
AJ_POU2F1::ETV4_001	-3.20107	0.999429	0.784612	0.786748	0.0353815	0.036039	0.99943	3228.51
AJ_POU2F1::ETV4_002	-3.20107	0.999429	0.784612	0.786748	0.0353815	0.036039	0.99943	3228.51
BU0098 Zfp410_primary	-3.20686	0.999437	0.830593	0.832872	0.0370288	0.0384174	0.999543	3236.76
BU0104 Zscan4_primary	-3.20516	0.999441	0.806359	0.809166	0.047128	0.0472812	0.999341	3221.93
TA0200_Meis3_DBD_dimer	-3.21221	0.999451	0.81171	0.814209	0.0411876	0.0420103	0.999461	3229.11
MEIS1_HUMAN.H10MO.C	-3.21878	0.99948	0.85333	0.855544	0.0392404	0.0370599	0.998852	3197.7
AJ_FLI1::CEBPD	-3.2431	0.99951	0.777579	0.77946	0.0308128	0.0313361	0.999502	3227.82
ZN652_HUMAN.H10MO.D	-3.24345	0.999522	0.830061	0.832741	0.0466264	0.044542	0.999049	3202.06
NR1I3_HUMAN.H10MO.S	-3.26008	0.999546	0.969069	0.970685	0.0272834	0.0267486	0.999307	3212.33
TA0211_MYBL2_DBD_dimer	-3.27614	0.999572	0.77607	0.778188	0.0355902	0.0348679	0.999339	3212.04
AJ_ETV2::CEBPD	-3.2821	0.999578	0.797256	0.79914	0.0310374	0.0309766	0.999468	3219.72
TA0290_TBR1_DBD_monomer	-3.29454	0.999598	0.858395	0.860916	0.0418119	0.0412969	0.99943	3215.37
MA0802.1 TBR1	-3.29454	0.999598	0.858395	0.860916	0.0418119	0.0412969	0.99943	3215.37
TA0198_Meis2_DBD_dimer	-3.30157	0.999607	0.812624	0.815209	0.0422901	0.0422604	0.99951	3220.26
MA0089.1 MAFG::NFE2L1	-3.3006	0.999614	0.987687	0.989019	0.0229515	0.0217333	0.999138	3198.69
TA0085_Zfp652_DBD_monomer	-3.31752	0.999635	0.809502	0.812321	0.0476632	0.045811	0.999299	3204.42
AJ_PITX1::TBX21	-3.32461	0.999637	0.784706	0.786614	0.0306724	0.0309925	0.999601	3225
AJ_ETV2::HOXB13_001	-3.32355	0.999638	0.838485	0.840475	0.0323949	0.0323055	0.999537	3219.38
AJ_TEAD4::ERG_001	-3.33768	0.999659	0.779539	0.781307	0.0292607	0.028567	0.999444	3210.63
AJ_ETV2::ONECUT2_005	-3.34427	0.999661	0.763488	0.765364	0.0295994	0.0303108	0.999682	3230.87
MA0037.1 GATA3	-3.34139	0.999662	0.985949	0.98711	0.0190292	0.0187445	0.999502	3214.26
BU0007 Bhlhb2_primary	-3.35519	0.999676	0.790284	0.792474	0.0349792	0.0352429	0.999632	3223.76
AJ_ETV2::ONECUT2_002	-3.3599	0.99968	0.745599	0.747561	0.0308873	0.0315501	0.999691	3229.75
TA0105_E2F3_DBD_dimer	-3.36055	0.999686	0.734223	0.736439	0.0361603	0.0355671	0.999527	3213.66
AJ_HOXB2::SPDEF	-3.37212	0.999695	0.76843	0.770262	0.0288778	0.029338	0.999686	3227.37
STAT6_HUMAN.H10MO.C	-3.37914	0.999709	0.865471	0.86793	0.0404761	0.0392247	0.999478	3207.66
AJ_TEAD4::EOMES_004	-3.39023	0.999714	0.798874	0.800569	0.0262607	0.0270083	0.999746	3232.8
HU0010_ZBTB12	-3.38793	0.999716	0.800619	0.803083	0.0397051	0.0392329	0.999592	3215.54
TA0307_TBX21_full_dimer	-3.40916	0.999734	0.713806	0.716301	0.038567	0.039541	0.999755	3231.4
AJ_TEAD4::FOXI1_002	-3.4118	0.999736	0.77513	0.776797	0.0255429	0.0264033	0.99978	3235.08
NKX25_HUMAN.H10MO.C	-3.41061	0.99974	0.957035	0.959151	0.0339329	0.0334745	0.999616	3214.87
BU0090 Zbtb12_primary	-3.43463	0.999762	0.802223	0.804713	0.0396452	0.0391195	0.999649	3214.97
TA0305_TBX21_DBD_monomer	-3.44923	0.999772	0.866427	0.869064	0.0406017	0.0412909	0.999768	3227.81
TA0311_TBX2_full_monomer	-3.45027	0.999774	0.871382	0.873693	0.0359887	0.0361603	0.999732	3222.58
MA0688.1 TBX2	-3.45027	0.999774	0.871382	0.873693	0.0359887	0.0361603	0.999732	3222.58
TA0268_RFX4_DBD_dimer	-3.44827	0.999776	0.809688	0.812163	0.0399957	0.0386913	0.999581	3206.97
MA0799.1 RFX4	-3.44827	0.999776	0.809688	0.812163	0.0399957	0.0386913	0.999581	3206.97
MA0727.1 NR3C2	-3.45525	0.99978	0.777909	0.780487	0.0408423	0.0402678	0.999671	3214.64
MA0592.2 Esrra	-3.45619	0.999782	0.826381	0.829402	0.0483309	0.0471323	0.999628	3210.18
AJ_ELK1::FOXI1_004	-3.46592	0.999786	0.832485	0.834486	0.0304163	0.0311888	0.999803	3231.46
AJ_ARNTL::PITX1_001	-3.47463	0.999792	0.779117	0.781932	0.0426418	0.0437688	0.999812	3231.91
TA0698_Esrra_DBD_monomer	-3.47125	0.999794	0.826403	0.829437	0.0483418	0.0471349	0.999647	3210.11
MA0464.1 Bhlhe40	-3.47494	0.999797	0.892101	0.894696	0.0412932	0.0402695	0.999652	3210.18
AJ_ETV2::HOXB13_002	-3.47865	0.999801	0.808614	0.810738	0.0340616	0.0329302	0.999621	3206.72
AJ_ELK1::FOXI1_001	-3.48124	0.999804	0.786729	0.788774	0.0330195	0.0316624	0.999587	3203.51
MA0659.1 MAFG	-3.49528	0.99981	0.757512	0.759648	0.032632	0.0330079	0.999792	3225.47
TA0716_NR3C2_DBD_dimer	-3.49362	0.99981	0.778074	0.78068	0.0408241	0.0402563	0.999714	3214.7
TA0414_MAFG_full_dimer	-3.5003	0.999813	0.757275	0.759416	0.0326505	0.0330332	0.999796	3225.55
SCRT1_HUMAN.H10MO.D	-3.50365	0.999815	0.813686	0.816351	0.0405322	0.0410755	0.999803	3226.27
TA0274_Rfx3_DBD_dimer	-3.5007	0.999817	0.749905	0.752809	0.0461431	0.0447375	0.99966	3207.85
AJ_FLI1::DLX2_003	-3.52792	0.999831	0.740771	0.742985	0.0328941	0.033918	0.999856	3233.96
TA0778_ZNF713_full_monomer	-3.54479	0.999843	0.734013	0.736426	0.0363295	0.0367575	0.999828	3225.58
TA0193_MEIS2_DBD_dimer	-3.54898	0.999846	0.756805	0.759633	0.0426245	0.0430352	0.999826	3224.66
TCF7_HUMAN.H10MO.C	-3.55672	0.99985	0.898245	0.900252	0.0302706	0.0304672	0.999825	3223.32
TA0358_MLXIPL_full_dimer	-3.5601	0.999853	0.844395	0.847242	0.0430785	0.0431599	0.999816	3221.35
HOMEO0142_Pknox1_2364.2	-3.56822	0.999859	0.813517	0.81601	0.0384469	0.0376872	0.999766	3212.27
AJ_HOXB2::ELF1_001	-3.57701	0.999861	0.793375	0.795452	0.0305008	0.0313857	0.999879	3233.04
MA0664.1 MLXIPL	-3.58067	0.999864	0.844483	0.847344	0.0430542	0.0431312	0.99983	3221.31
RFX4_HUMAN.H10MO.D	-3.5792	0.999865	0.796684	0.799431	0.0424688	0.0414016	0.99976	3210.04
TA0416_MAFK_DBD_dimer	-3.5948	0.999871	0.763342	0.765535	0.0326441	0.0329524	0.999854	3224.58
TA0306_TBX21_DBD_dimer	-3.60166	0.999874	0.740962	0.743253	0.0334813	0.0343689	0.999886	3231.95
TA0217_NFATC1_full_dimer	-3.60443	0.999876	0.768462	0.771194	0.0407369	0.0409266	0.99985	3222.53
AJ_HOXD12::EOMES_001	-3.60245	0.999876	0.710586	0.712203	0.0245881	0.0242168	0.999806	3214.2
MA0140.1 Tal1::Gata1	-3.60508	0.999878	0.837202	0.83958	0.0363598	0.0355868	0.999792	3211.64
AJ_ETV5::EVX1_002	-3.61132	0.999878	0.808477	0.810544	0.0300939	0.0309267	0.999892	3232.45
MA0071.1 RORA	-3.61279	0.999881	0.891489	0.894523	0.0459951	0.045306	0.999813	3214.25
STA5B_HUMAN.H10MO.C	-3.61231	0.999882	0.900307	0.903041	0.0420128	0.0408028	0.999777	3208.53
STA5A_HUMAN.H10MO.B	-3.62967	0.99989	0.897969	0.900728	0.042479	0.0409723	0.999772	3205.8
AJ_HOXB2::ESRRB_002	-3.64459	0.999894	0.774454	0.776687	0.0324805	0.0331	0.999894	3228.72
TA0725_RARA_DBD_dimer	-3.64694	0.999894	0.745567	0.748256	0.03877	0.0398434	0.999907	3232.46
MA0729.1 RARA	-3.65285	0.999897	0.745519	0.748215	0.0388019	0.0398721	0.999909	3232.41
MA0749.1 ZBED1	-3.6796	0.999908	0.745293	0.747812	0.0362036	0.0369851	0.999911	3229.81
AJ_ETV2::SOX15_004	-3.68322	0.999908	0.784438	0.786564	0.0297125	0.0312035	0.999941	3242.39
TA0295_TBX1_DBD_dimer	-3.68625	0.999912	0.728138	0.730382	0.0333563	0.0328434	0.999858	3214.09
TA0066_ZBED1_DBD_dimer	-3.69398	0.999913	0.745403	0.747931	0.0361729	0.0369732	0.999917	3230.04
TA0764_TP63_DBD_dimer	-3.69395	0.999916	0.744451	0.746821	0.0361114	0.0345805	0.999803	3202.99
MA0525.2 TP63	-3.70207	0.999918	0.744115	0.746492	0.0361435	0.0346183	0.999809	3203.07
TA0264_RFX2_DBD_dimer	-3.71175	0.999921	0.765281	0.768322	0.0453638	0.0441868	0.999851	3209.71
MA0600.2 RFX2	-3.71175	0.999921	0.765281	0.768322	0.0453638	0.0441868	0.999851	3209.71
RUNX2_HUMAN.H10MO.B	-3.71487	0.999921	0.905548	0.907948	0.0350606	0.0348556	0.999888	3218.08
AJ_FLI1::FOXI1_004	-3.71987	0.999921	0.798374	0.800674	0.0325781	0.0334003	0.999929	3231.39
TA0701_HNF4A_full_dimer	-3.72489	0.999922	0.777956	0.780738	0.0387008	0.0403692	0.999946	3239.24
AJ_HOXD12::ELK3_001	-3.72611	0.999925	0.783544	0.785743	0.0321719	0.0318448	0.999886	3216.27
TA0152_SPDEF_full_monomer	-3.73192	0.999926	0.812014	0.814318	0.0330851	0.0333353	0.999913	3223.77
MA0037.2 GATA3	-3.75144	0.999932	0.901114	0.904703	0.0515597	0.0516474	0.999913	3221.28
TA0266_RFX3_DBD_dimer	-3.74938	0.999932	0.793686	0.796506	0.0415302	0.0405664	0.999876	3210.84
MA0798.1 RFX3	-3.74938	0.999932	0.793686	0.796506	0.0415302	0.0405664	0.999876	3210.84
MA0758.1 E2F7	-3.76258	0.999933	0.73734	0.740319	0.040661	0.0428091	0.99996	3243.57
TA0270_RFX5_DBD_dimer	-3.77701	0.999939	0.757985	0.76111	0.0452932	0.0446335	0.999901	3214.43
MA0510.2 RFX5	-3.77701	0.999939	0.757985	0.76111	0.0452932	0.0446335	0.999901	3214.43
TA0108_E2F7_DBD_dimer	-3.78898	0.99994	0.737277	0.740279	0.0406879	0.0428269	0.999964	3243.46
AJ_HOXB2::TBX21_001	-3.80035	0.999945	0.829783	0.832264	0.0355442	0.0352271	0.999916	3216.79
RXRG_HUMAN.H10MO.B	-3.80241	0.999945	0.811605	0.8145	0.0418912	0.0410802	0.999904	3212.43
TA0512_DPRX_DBD_monomer	-3.80775	0.999946	0.857448	0.860118	0.0377936	0.0378593	0.99993	3221.29
AJ_TEAD4::CEBPB_001	-3.81649	0.999947	0.742013	0.744134	0.0293935	0.0300228	0.999949	3229.73
AJ_ELK1::HOXA3_001	-3.82211	0.999949	0.736097	0.737997	0.0267116	0.0268388	0.999937	3222.58
TA0855_RFX5_DBD_dimer	-3.83067	0.999951	0.760138	0.763354	0.0458337	0.045293	0.999923	3215.58
TA0317_TEAD1_full_monomer	-3.83439	0.999953	0.924386	0.926669	0.0331955	0.0321023	0.999897	3206.84
MA0090.2 TEAD1	-3.83439	0.999953	0.924386	0.926669	0.0331955	0.0321023	0.999897	3206.84
TA0271_RFX5_DBD_dimer	-3.83949	0.999953	0.759966	0.763191	0.0458658	0.0453183	0.999925	3215.53
AJ_TEAD4::SOX6	-3.85572	0.999956	0.784898	0.787156	0.0316283	0.0316052	0.999941	3220.24
TA0777_ZNF435_full_dimer	-3.86636	0.999958	0.726243	0.728808	0.0358559	0.0358085	0.999943	3219.99
AJ_TFAP4::DLX3_002	-3.8691	0.999958	0.760314	0.762768	0.0343335	0.0342356	0.999942	3219.35
AJ_GCM2::DLX3_001	-3.87691	0.999959	0.803787	0.805916	0.0287791	0.0296739	0.999966	3233.95
AJ_PITX1::EOMES_002	-3.88025	0.99996	0.799286	0.801431	0.0292125	0.0298665	0.999962	3230.15
TA0704_HNF4A_full_dimer	-3.90006	0.999963	0.785127	0.788071	0.0402271	0.0407643	0.99996	3226.25
TA0272_Rfx2_DBD_dimer	-3.90371	0.999965	0.779663	0.782744	0.0437101	0.042558	0.999929	3209.54
AJ_TEAD4::MAX_002	-3.92093	0.999967	0.781615	0.784294	0.0373702	0.0368577	0.999945	3214.78
AJ_MGA::DLX3_001	-3.92475	0.999967	0.835879	0.83844	0.0348338	0.0352297	0.999963	3225.4
TA0214_MYBL2_DBD_dimer	-3.93608	0.999969	0.755975	0.758613	0.036313	0.0361753	0.999955	3218.95
MA0777.1 MYBL2	-3.93608	0.999969	0.755975	0.758613	0.036313	0.0361753	0.999955	3218.95
MAF_HUMAN.H10MO.B	-3.95754	0.999971	0.9278	0.930358	0.0333893	0.0349392	0.999981	3240.71
AJ_HOXB13::ELK1	-3.95449	0.999972	0.824693	0.826901	0.0310136	0.0301026	0.999939	3208.3
ZN713_HUMAN.H10MO.D	-3.99092	0.999975	0.842097	0.844611	0.0333731	0.0340332	0.999975	3229.02
HOMEO0163_Six1_0935.2	-4.00067	0.999976	0.808696	0.811352	0.0356163	0.0358408	0.999971	3223.23
TBX21_HUMAN.H10MO.D	-4.00088	0.999976	0.824462	0.82755	0.0413915	0.041681	0.999971	3223.53
TA0315_TBX5_DBD_dimer	-4.01236	0.999977	0.727128	0.729753	0.034735	0.035324	0.999977	3227.8
TA0382_USF1_DBD_dimer	-4.01021	0.999977	0.870135	0.87359	0.0472078	0.0464799	0.99996	3214.07
MA0032.1 FOXC1	-4.00886	0.999978	0.975207	0.976132	0.0129829	0.0124268	0.999939	3202.81
MA0164.1 Nr2e3	-4.01843	0.999978	0.906312	0.910991	0.0627956	0.0628528	0.99997	3220.94
MA0027.1 En1	-4.01761	0.999978	0.940249	0.941706	0.0202379	0.0195472	0.999949	3206.35
TA0715_NR3C1_DBD_dimer	-4.02	0.999979	0.781595	0.784601	0.041417	0.0403335	0.999955	3209.62
MA0113.3 NR3C1	-4.02491	0.999979	0.78165	0.784657	0.0413879	0.0402954	0.999956	3209.52
RORA_HUMAN.H10MO.B	-4.03422	0.999979	0.844831	0.847915	0.0397259	0.0413178	0.999985	3237.9
COT1_HUMAN.H10MO.B	-4.0444	0.999981	0.902581	0.90537	0.0379726	0.0371865	0.999963	3211.88
TA0361_MYF6_full_dimer	-4.04597	0.999981	0.852658	0.855877	0.043406	0.0429373	0.999968	3216
GATA1_HUMAN.H10MO.S	-4.04552	0.999981	0.898655	0.901953	0.0451576	0.0439709	0.999959	3209.57
MA0667.1 MYF6	-4.04863	0.999981	0.852636	0.855856	0.0433907	0.0429226	0.999969	3216.01
TA0103_E2F2_DBD_dimer	-4.05585	0.999982	0.731309	0.733905	0.0356555	0.0345083	0.999957	3207.15
AJ_HOXB2::ELK3_001	-4.06627	0.999982	0.785854	0.788241	0.0310654	0.0317187	0.999983	3229.57
BU0054 Rfx3_primary	-4.06592	0.999982	0.789716	0.792384	0.0351169	0.0354309	0.999979	3224.36
AJ_HOXD12::FIGLA	-4.06625	0.999982	0.814205	0.816776	0.0347371	0.0341055	0.999967	3212.92
TFE3_HUMAN.H10MO.C	-4.0725	0.999983	0.915711	0.918486	0.0368444	0.0367741	0.999975	3219.74
BU0078 Srf_primary	-4.064	0.999983	0.83491	0.837694	0.0392804	0.0368998	0.999936	3195.69
AJ_TEAD4::ONECUT2	-4.07579	0.999983	0.777863	0.780406	0.0337056	0.0336761	0.999976	3220.18
AJ_TEAD4::EOMES_005	-4.08716	0.999984	0.890907	0.893105	0.0281037	0.0290591	0.999987	3235.22
MA0462.1 BATF::JUN	-4.12307	0.999987	0.883097	0.886171	0.0425421	0.0401608	0.999952	3197.53
ZSC16_HUMAN.H10MO.D	-4.1428	0.999987	0.775239	0.777531	0.0300841	0.029859	0.99998	3217.39
HXB2_HUMAN.H10MO.D	-4.15342	0.999988	0.802422	0.805839	0.0458304	0.044364	0.999971	3207.22
AJ_CLOCK::BHLHA15	-4.17343	0.999989	0.80096	0.803355	0.0310607	0.0309806	0.999984	3219.46
BU0075 Sp100_primary	-4.16647	0.999989	0.806108	0.80899	0.039232	0.0372688	0.999963	3199.91
NR6A1_HUMAN.H10MO.B	-4.19699	0.99999	0.825878	0.829632	0.0472078	0.0483207	0.999991	3230.67
TA0031_BCL6B_DBD_monomer	-4.19572	0.99999	0.724679	0.727675	0.0386931	0.0385381	0.999985	3218.86
MA0731.1 BCL6B	-4.20483	0.999991	0.724783	0.727785	0.0386782	0.038529	0.999986	3218.92
AJ_HOXB2::ETV7_001	-4.20659	0.999991	0.802622	0.805037	0.0316441	0.0309691	0.999981	3211.61
MA0077.1 SOX9	-4.21516	0.999991	0.901814	0.904741	0.0374405	0.0374862	0.999987	3221.07
MA0140.2 GATA1::TAL1	-4.2175	0.999991	0.821205	0.824197	0.0391002	0.0382626	0.999982	3211.58
TA0347_CLOCK_DBD_dimer	-4.23332	0.999992	0.860628	0.863592	0.0378198	0.0377897	0.999988	3220.22
MA0819.1 CLOCK	-4.23501	0.999992	0.860643	0.863608	0.0378012	0.037785	0.999988	3220.37
TA0748_Rara_DBD_dimer	-4.24537	0.999992	0.754229	0.757505	0.0403534	0.0417041	0.999994	3234.99
AJ_GCM2::SOX15_004	-4.24085	0.999992	0.793497	0.795711	0.0284215	0.028175	0.999987	3216.89
AJ_GCM2::ONECUT2	-4.24826	0.999992	0.768624	0.771003	0.0308937	0.0301935	0.999984	3211.06
TA0167_TCF7L1_full_monomer	-4.2557	0.999992	0.82952	0.832583	0.0386784	0.0388506	0.99999	3222.44
AJ_MGA::DLX2_001	-4.25476	0.999992	0.823034	0.826094	0.0390144	0.0388171	0.999988	3218.42
TYY2_HUMAN.H10MO.D	-4.2983	0.999994	0.8354	0.839175	0.0446716	0.0475067	0.999997	3248.36
AJ_CEBPG::ELF1	-4.29417	0.999994	0.814703	0.816656	0.023857	0.0245697	0.999995	3233.42
TA0815_SOX8_DBD_dimer	-4.30527	0.999994	0.776381	0.77985	0.0443906	0.0434566	0.999987	3211.73
TA0176_HSFY2_DBD_dimer	-4.30765	0.999994	0.756165	0.758861	0.0348976	0.0337495	0.999985	3206.85
TBR1_HUMAN.H10MO.D	-4.32105	0.999995	0.813257	0.816443	0.0406085	0.0397712	0.999988	3211.91
TA0730_RARG_DBD_dimer	-4.33579	0.999995	0.754782	0.757884	0.0373164	0.0386654	0.999996	3236.17
AJ_ETV2::DLX3_004	-4.3467	0.999995	0.787301	0.789864	0.0312471	0.0318474	0.999995	3228.78
TA0749_Rarb_DBD_dimer	-4.35047	0.999995	0.740611	0.744072	0.0413542	0.0429913	0.999997	3237.69
MA0857.1 Rarb	-4.35799	0.999995	0.74057	0.744037	0.0413767	0.0429922	0.999997	3237.44
ETV2_HUMAN.H10MO.D	-4.3462	0.999995	0.947364	0.949111	0.0229574	0.0216457	0.99998	3197.07
HOMEO0172_Tgif2_3451.1	-4.36091	0.999995	0.798511	0.801667	0.0397907	0.0390408	0.999991	3212.65
AJ_HOXD12::ELK1_002	-4.36774	0.999996	0.776036	0.778938	0.0379825	0.0357991	0.999982	3196.93
TA0065_YY2_full_monomer	-4.39836	0.999996	0.887695	0.890697	0.0345096	0.0369173	0.999999	3251.22
TA0391_CEBPG_DBD_dimer	-4.40574	0.999996	0.822206	0.825425	0.040324	0.0394172	0.999992	3211.14
MA0838.1 CEBPG	-4.40658	0.999996	0.822146	0.825367	0.0403268	0.0394252	0.999992	3211.19
TA0171_HSF1_full_trimer	-4.42503	0.999997	0.801559	0.805427	0.0471429	0.0471916	0.999995	3220.99
MA0486.2 HSF1	-4.42503	0.999997	0.801559	0.805427	0.0471429	0.0471916	0.999995	3220.99
BHE23_HUMAN.H10MO.D	-4.43339	0.999997	0.895528	0.897699	0.0254854	0.026462	0.999998	3237.12
AJ_TEAD4::MAX_003	-4.43202	0.999997	0.780929	0.783938	0.0361654	0.0366715	0.999996	3226.53
AJ_TEAD4::TBX21_002	-4.4413	0.999997	0.79302	0.795547	0.03193	0.030673	0.99999	3204.22
NFAC1_HUMAN.H10MO.S	-4.45318	0.999997	0.831893	0.835208	0.04045	0.0401724	0.999995	3217.65
AJ_HOXD12::ELK3_003	-4.46208	0.999997	0.792736	0.795515	0.0341444	0.0335992	0.999994	3213.84
MA0069.1 Pax6	-4.4806	0.999997	0.811618	0.814329	0.0337679	0.0326191	0.999993	3206.39
NFAC4_HUMAN.H10MO.C	-4.49758	0.999998	0.931082	0.933417	0.0286101	0.0280015	0.999995	3211.64
TA0285_EOMES_DBD_monomer	-4.50796	0.999998	0.839015	0.842257	0.0383541	0.0388379	0.999997	3225.94
MA0800.1 EOMES	-4.50796	0.999998	0.839015	0.842257	0.0383541	0.0388379	0.999997	3225.94
HOMEO0114_Nkx2-3_3435.1	-4.53229	0.999998	0.805503	0.80854	0.0367502	0.0361502	0.999996	3213.69
MA0483.1 Gfi1b	-4.54543	0.999998	0.890064	0.893155	0.0377233	0.0366713	0.999995	3208.91
AJ_ATF4::CEBPB	-4.55129	0.999998	0.805537	0.809121	0.0422349	0.0425213	0.999998	3223.44
HOMEO0165_Six3_1732.2	-4.56276	0.999998	0.785423	0.78857	0.0372132	0.0372243	0.999997	3220.68
TA0289_MGA_DBD_dimer	-4.56214	0.999998	0.744923	0.74771	0.0332193	0.0329727	0.999997	3217.42
TA0172_HSF2_DBD_trimer	-4.57629	0.999998	0.814198	0.818065	0.0458631	0.0456085	0.999997	3218.21
MA0770.1 HSF2	-4.57629	0.999998	0.814198	0.818065	0.0458631	0.0456085	0.999997	3218.21
AJ_HOXD12::TBX21_001	-4.58082	0.999998	0.758162	0.760913	0.033581	0.0323771	0.999995	3205.65
TA0194_MEIS2_DBD_monomer	-4.5997	0.999999	0.924822	0.928445	0.043354	0.042486	0.999997	3212.16
MA0774.1 MEIS2	-4.5997	0.999999	0.924822	0.928445	0.043354	0.042486	0.999997	3212.16
AJ_TFAP4::DLX3_001	-4.60251	0.999999	0.779888	0.782819	0.0346111	0.0343699	0.999998	3217.61
BU0013 Eomes_primary	-4.6209	0.999999	0.820006	0.823038	0.0352947	0.0354256	0.999998	3222.13
MEIS2_HUMAN.H10MO.B	-4.63074	0.999999	0.831179	0.834784	0.0421325	0.0420195	0.999998	3219.42
AJ_ALX4::TBX21_001	-4.62597	0.999999	0.774619	0.77699	0.0289985	0.0276176	0.999995	3200.88
MA0809.1 TEAD4	-4.64182	0.999999	0.930393	0.933296	0.0356016	0.0337036	0.999995	3198.6
TA0321_TEAD4_DBD_monomer	-4.64763	0.999999	0.930362	0.933271	0.0356222	0.0337231	0.999995	3198.6
TF2LX_HUMAN.H10MO.D	-4.66222	0.999999	0.823614	0.826422	0.0328162	0.0324912	0.999998	3216.38
AJ_ETV5::HOXA2_002	-4.66746	0.999999	0.768748	0.771417	0.0318368	0.0308376	0.999997	3207.47
ANDR_HUMAN.H10MO.A	-4.67311	0.999999	0.851541	0.854233	0.0315243	0.0310865	0.999998	3214.71
TA0727_RARA_full_dimer	-4.68112	0.999999	0.767966	0.771444	0.0395394	0.0401281	0.999999	3226.91
MA0038.1 Gfi1	-4.68092	0.999999	0.92181	0.924554	0.0321443	0.031633	0.999998	3213.87
TA0782_E2F2_DBD_dimer	-4.69473	0.999999	0.7315	0.734687	0.037616	0.0366068	0.999998	3209.34
MA0036.1 GATA2	-4.69027	0.999999	0.996817	0.997428	0.00770424	0.00700814	0.999991	3184.09
MA0864.1 E2F2	-4.70322	0.999999	0.731539	0.734731	0.0376092	0.0366051	0.999998	3209.4
FOXH1_HUMAN.H10MO.A	-4.71178	0.999999	0.873293	0.876745	0.0401729	0.0395277	0.999998	3213.8
AJ_SOX6::TBX21_001	-4.71895	0.999999	0.810831	0.813684	0.0330402	0.0326187	0.999998	3215.18
MA0606.1 NFAT5	-4.74245	0.999999	0.922603	0.925378	0.0310929	0.0315993	0.999999	3227.51
MA0019.1 Ddit3::Cebpa	-4.75407	0.999999	0.868912	0.871881	0.0341721	0.0337027	0.999999	3214.77
GN_IRF_IRF8	-4.7706	0.999999	0.889791	0.893506	0.0429516	0.0420029	0.999998	3211.3
AJ_ATF4::CEBPD	-4.8084	0.999999	0.803518	0.807225	0.0414792	0.0416263	0.999999	3222.06
HOMEO0173_Titf1_1722.2	-4.81262	0.999999	0.82711	0.829907	0.0308784	0.0313875	0.999999	3227.6
ZN384_HUMAN.H10MO.C	-4.8165	1	0.899613	0.902865	0.0385295	0.0363721	0.999997	3197.53
MA0036.2 GATA2	-4.82711	1	0.867039	0.870426	0.0379756	0.0378644	0.999999	3219.31
GATA4_HUMAN.H10MO.B	-4.82538	1	0.940641	0.943725	0.0353475	0.0344736	0.999999	3210.21
BU0021 Gata3_primary	-4.82023	1	0.797229	0.8004	0.037574	0.0354414	0.999997	3197.22
TA0213_MYBL2_DBD_monomer	-4.84193	1	0.842071	0.845413	0.0374259	0.0372425	0.999999	3218.48
HU0028_ZNF45	-4.8441	1	0.793006	0.796297	0.0377362	0.0366272	0.999999	3208.29
TA0157_GATA3_DBD_monomer	-4.84842	1	0.939015	0.942199	0.0368975	0.0354024	0.999998	3203.75
AJ_GCM2::HOXA13	-4.86736	1	0.755902	0.758976	0.0329072	0.0341254	1	3236.55
BATF3_HUMAN.H10MO.D	-4.85666	1	0.878798	0.881381	0.0299232	0.0286628	0.999998	3203.1
TA0195_MEIS3_DBD_monomer	-4.87742	1	0.944943	0.947978	0.0347763	0.033542	0.999999	3205.79
MA0775.1 MEIS3	-4.87742	1	0.944943	0.947978	0.0347763	0.033542	0.999999	3205.79
TA0600_LBX2_DBD_dimer	-4.90073	1	0.864265	0.866749	0.0273158	0.0273628	1	3221.28
ZBED1_HUMAN.H10MO.D	-4.91313	1	0.732856	0.736344	0.0375946	0.0383416	1	3229.06
TGIF2_HUMAN.H10MO.D	-4.90958	1	0.846615	0.850727	0.0464574	0.0451653	0.999999	3208.94
ELF5_HUMAN.H10MO.D	-4.93124	1	0.917613	0.920336	0.0291985	0.0298342	1	3229.89
AJ_TEAD4::PITX1_005	-4.9397	1	0.780439	0.783543	0.033484	0.0339232	1	3226.15
MA0624.1 NFATC1	-4.99527	1	0.930091	0.932911	0.0302016	0.0304913	1	3224.64
TA0820_SOX8_full_dimer	-4.99507	1	0.770807	0.774844	0.044544	0.0435972	0.999999	3211.65
AJ_HOXB13::ETV1	-5.00245	1	0.819069	0.821934	0.0317175	0.0308792	0.999999	3209.51
AJ_TEAD4::FOXI1_003	-5.01685	1	0.782487	0.784993	0.0269859	0.0269608	1	3220.16
TA0385_Atf4_DBD_dimer	-5.0293	1	0.777265	0.780852	0.0378844	0.0385136	1	3227.65
MA0492.1 JUND.var.2	-5.03991	1	0.846229	0.850064	0.0408169	0.0410828	1	3223.32
TA0392_CEBPG_full_dimer	-5.03799	1	0.827872	0.831453	0.0389945	0.0383462	1	3213.57
TA0752_Rarg_DBD_dimer	-5.05452	1	0.757334	0.761316	0.0409921	0.0425742	1	3237.25
MA0859.1 Rarg	-5.07384	1	0.757307	0.761302	0.0409757	0.0425602	1	3237.28
AJ_MYBL1::ONECUT2	-5.0711	1	0.765689	0.768533	0.0310838	0.0302368	1	3209.17
AJ_TEAD4::RFX5_001	-5.08474	1	0.764098	0.766955	0.0307912	0.0303166	1	3214.07
HOMEO0116_Nkx2-5_3436.1	-5.10647	1	0.826574	0.829807	0.0335154	0.0342036	1	3229.35
MA0043.1 HLF	-5.12835	1	0.871151	0.874139	0.0327304	0.0313966	1	3203.66
AJ_SOX17	-5.13682	1	0.868629	0.87182	0.0342288	0.033506	1	3211.7
HOMEO0111_Nkx1-1_3856.3	-5.14809	1	0.816105	0.818962	0.0303651	0.0299426	1	3214.7
AJ_TEAD4::RFX5_002	-5.16675	1	0.771017	0.773775	0.028544	0.0288238	1	3224.73
MA0117.2 Mafb	-5.17363	1	0.865377	0.868841	0.035084	0.0361754	1	3233.96
TA0419_Mafb_DBD_monomer	-5.18019	1	0.865407	0.868874	0.0350693	0.0361637	1	3234
AJ_HOXD12::TBX21_002	-5.17947	1	0.758831	0.761212	0.025254	0.0248095	1	3213.16
HLF_HUMAN.H10MO.C	-5.19466	1	0.85046	0.854108	0.0389181	0.0378712	1	3209.31
HXA7_HUMAN.H10MO.D	-5.21927	1	0.855929	0.858268	0.0235285	0.0242116	1	3233.05
TA0158_GATA3_full_monomer	-5.21278	1	0.943976	0.947369	0.0363475	0.0350889	1	3206.15
TA0669_RHOXF1_full_monomer	-5.25347	1	0.96246	0.96491	0.0249309	0.025186	1	3224.91
AJ_CLOCK::EVX1_002	-5.2606	1	0.739005	0.742382	0.0333919	0.0346909	1	3237.38
AJ_ELK1::HOXB13_002	-5.27593	1	0.838843	0.841859	0.0316473	0.0308295	1	3209.75
AJ_MYBL1::HOXA13	-5.28054	1	0.755459	0.758401	0.0303924	0.0300713	1	3216.1
AJ_TEAD4::SOX15_002	-5.30177	1	0.827601	0.830411	0.0289982	0.0285962	1	3214.72
ZN410_HUMAN.H10MO.D	-5.31047	1	0.751439	0.755928	0.045227	0.045647	1	3224.51
AJ_TEAD4::FOXI1_001	-5.31868	1	0.837045	0.840123	0.0329097	0.0311796	1	3198.89
AJ_HOXB2::RFX5_001	-5.33686	1	0.783564	0.786664	0.0314249	0.031357	1	3219.64
MA0442.1 SOX10	-5.31916	1	0.990801	0.992621	0.020504	0.0183938	0.999999	3179.31
MA0625.1 NFATC3	-5.34424	1	0.915115	0.918518	0.0341993	0.0343699	1	3222.67
MA0147.2 Myc	-5.3493	1	0.904112	0.908873	0.0467922	0.0480835	1	3232.42
AJ_CLOCK::EVX1_001	-5.34061	1	0.805754	0.80876	0.0310867	0.0303503	1	3210.64
CUX1_HUMAN.H10MO.C	-5.34885	1	0.857674	0.860687	0.0299902	0.0304227	1	3226.71
AJ_TEAD4::PITX1_002	-5.35533	1	0.795371	0.798244	0.0275702	0.0290099	1	3243.3
AJ_ATF4::TEF	-5.34904	1	0.798096	0.801962	0.039189	0.039006	1	3218.58
AJ_POU2F1::EOMES_005	-5.35759	1	0.736694	0.739308	0.0265513	0.0263359	1	3217.13
AJ_HOXA4	-5.36857	1	0.954668	0.957037	0.0243213	0.023802	1	3211.61
MGAP_HUMAN.H10MO.D	-5.37247	1	0.755254	0.75892	0.0380174	0.0367889	1	3207.09
AJ_GCM2::DLX2	-5.3964	1	0.80868	0.811692	0.0295403	0.0301458	1	3229.33
AJ_TEAD4::EOMES_006	-5.39298	1	0.85939	0.862702	0.0337827	0.0331264	1	3212.4
MA0113.2 NR3C1	-5.41166	1	0.876042	0.878886	0.0276585	0.0283856	1	3231.85
HOMEO0115_Nkx2-4_3074.1	-5.41549	1	0.841897	0.84489	0.0288398	0.0298629	1	3235.87
TA0175_HSFY2_DBD_dimer	-5.40906	1	0.858116	0.861784	0.0377299	0.0365627	1	3207.66
TGIF1_HUMAN.H10MO.S	-5.40254	1	0.98227	0.985092	0.0310012	0.0280998	1	3182.85
AJ_TEAD4::DLX3_002	-5.44612	1	0.811999	0.815527	0.0366663	0.0349083	1	3200.75
HOMEO0171_Tgif1_2342.2	-5.45519	1	0.820029	0.823861	0.0388916	0.0378854	1	3209.74
BU0048 Nkx3-1_primary	-5.4613	1	0.82687	0.830619	0.0371243	0.0370577	1	3219.79
AJ_MEIS2::ONECUT2_001	-5.47025	1	0.767772	0.771145	0.0330194	0.0332928	1	3224.08
NR1H2_HUMAN.H10MO.D	-5.49202	1	0.720509	0.724358	0.0359105	0.0378968	1	3244.69
MEIS3_HUMAN.H10MO.D	-5.48027	1	0.881522	0.885862	0.0449426	0.0426733	1	3199.73
MA0752.1 ZNF410	-5.50357	1	0.734502	0.738704	0.0411368	0.0412205	1	3221.42
TA0077_ZNF410_DBD_monomer	-5.51537	1	0.734966	0.739169	0.041067	0.0411293	1	3221.2
NFAC2_HUMAN.H10MO.B	-5.52707	1	0.928342	0.931915	0.0351891	0.0348828	1	3216.88
SOX10_HUMAN.H10MO.D	-5.51579	1	0.981072	0.983573	0.0273325	0.0243696	1	3177.24
SOX9_HUMAN.H10MO.B	-5.56096	1	0.866737	0.87078	0.0391897	0.0392425	1	3221.12
TA0209_MYBL1_DBD_monomer	-5.60943	1	0.838878	0.842771	0.0375635	0.0374552	1	3219.33
MAFG_HUMAN.H10MO.S	-5.61041	1	0.959443	0.962723	0.0315693	0.0315535	1	3220.34
AJ_CUX1::SRF	-5.62878	1	0.732855	0.736052	0.0298868	0.0306841	1	3232.02
NF2L1_HUMAN.H10MO.C	-5.62366	1	0.972745	0.975435	0.0266694	0.0257897	1	3206.82
TA0766_Tp53_DBD_dimer	-5.63919	1	0.774585	0.778396	0.036815	0.0364709	1	3216.61
AJ_GCM1::FOXO1_001	-5.64212	1	0.80423	0.807734	0.0339392	0.0335066	1	3215.19
BU0071 Sox4_primary	-5.6502	1	0.869015	0.872814	0.0358998	0.0363043	1	3225.36
TA0318_TEAD1_full_dimer	-5.65294	1	0.808205	0.811921	0.0349901	0.0354973	1	3226.74
AJ_MGA::EVX1_001	-5.67867	1	0.838578	0.84266	0.0380845	0.0388207	1	3228.83
ISL1_HUMAN.H10MO.D	-5.68182	1	0.960449	0.96473	0.0433221	0.0405777	1	3194.6
MA0115.1 NR1H2::RXRA	-5.71372	1	0.728802	0.733113	0.0392824	0.0407745	1	3236.98
TA0719_NR4A2_full_monomer	-5.73101	1	0.837506	0.842054	0.0422913	0.0428505	1	3226.2
AJ_GCM2::SOX15_001	-5.74456	1	0.781716	0.784826	0.0285744	0.0292398	1	3230.54
AJ_HOXB2::EOMES_001	-5.7395	1	0.865725	0.869227	0.0337042	0.0329115	1	3210.71
TA0850_RARB_full_dimer	-5.76415	1	0.740365	0.745109	0.0430383	0.0444677	1	3234.88
HOMEO0104_Meis1_2335.1	-5.77183	1	0.816915	0.821222	0.0405693	0.0402701	1	3217.44
AJ_TEAD4::DLX2_003	-5.76956	1	0.810565	0.813828	0.0318952	0.0304823	1	3202.22
AJ_TEAD4::DLX3_003	-5.77403	1	0.822456	0.825976	0.0347032	0.0328513	1	3198.58
TA0309_TBX21_full_dimer	-5.80359	1	0.715449	0.719195	0.0350176	0.0348299	1	3218.29
HOMEO0113_Nkx2-2_2823.1	-5.82468	1	0.833189	0.836666	0.0310234	0.0322633	1	3237.85
BU0059 Six6_primary	-5.81612	1	0.807042	0.811155	0.0387448	0.0381536	1	3214.14
MA0466.2 CEBPB	-5.82856	1	0.857668	0.861613	0.0375245	0.0365042	1	3209.2
MA0078.1 Sox17	-5.83498	1	0.936755	0.940951	0.0398633	0.0387791	1	3209.19
AJ_TEAD4::ESRRB_001	-5.84426	1	0.806296	0.809732	0.0312411	0.0317532	1	3227.56
TA0387_CEBPB_DBD_dimer	-5.84439	1	0.857459	0.861425	0.0376178	0.0365884	1	3209.12
AJ_TEAD4::ESRRB_002	-5.86584	1	0.807983	0.811443	0.0316374	0.0318463	1	3223.36
CEBPG_HUMAN.H10MO.C	-5.869	1	0.868005	0.871671	0.0342933	0.0336949	1	3213.23
HOMEO0167_Six6_2267.4	-5.88647	1	0.790047	0.794064	0.0366625	0.0368375	1	3222.58
AJ_HOXB2::RFX5_002	-5.90835	1	0.796232	0.799925	0.0341606	0.0337189	1	3215.11
MA0836.1 CEBPD	-5.91783	1	0.849641	0.853679	0.03774	0.0367938	1	3210.07
TA0634_NKX3-1_full_monomer	-5.92663	1	0.895037	0.899212	0.0380112	0.0380182	1	3220.63
TA0389_CEBPD_DBD_dimer	-5.9389	1	0.849676	0.853727	0.0377524	0.0367919	1	3209.92
MA0668.1 NEUROD2	-5.94918	1	0.71878	0.721925	0.0278694	0.0285546	1	3231.11
MA0488.1 JUN	-5.94873	1	0.846199	0.850856	0.0424226	0.0422555	1	3218.89
ATOH1_HUMAN.H10MO.D	-5.95924	1	0.876523	0.880237	0.0327096	0.0336773	1	3233.29
AJ_ALX4::TBX21_002	-5.96071	1	0.825133	0.829372	0.038528	0.0383792	1	3218.92
MA0837.1 CEBPE	-5.95885	1	0.864743	0.868596	0.0358588	0.0348756	1	3209.1
TA0390_CEBPE_DBD_dimer	-5.96266	1	0.864362	0.868226	0.0359459	0.0349489	1	3208.97
TA0215_NFAT5_DBD_dimer	-5.96977	1	0.809538	0.814042	0.0407482	0.0407214	1	3220.27
AJ_MEIS1::SOX2	-5.97367	1	0.802809	0.80601	0.0297797	0.0289007	1	3208.24
HOMEO0106_Mrg1_2246.2	-5.98503	1	0.821254	0.825633	0.0393617	0.0395068	1	3222.12
TA0383_ATF4_DBD_dimer	-5.99331	1	0.81832	0.822497	0.0373049	0.0376306	1	3224.27
TA0765_Tp53_DBD_dimer	-6.00086	1	0.810371	0.814212	0.0337883	0.034578	1	3230.58
MA0833.1 ATF4	-6.009	1	0.81815	0.82234	0.0373342	0.0376548	1	3224.21
MAFK_HUMAN.H10MO.A	-6.05943	1	0.76071	0.76439	0.0326385	0.0327909	1	3222.54
AJ_PAX3	-6.16242	1	0.779662	0.783689	0.0353238	0.0352699	1	3219.91
MYBA_HUMAN.H10MO.D	-6.1662	1	0.833537	0.837869	0.0382218	0.0379147	1	3217.16
GFI1_HUMAN.H10MO.C	-6.16431	1	0.895324	0.899817	0.040945	0.0392881	1	3203.77
AJ_CEBPG::ATF4	-6.17876	1	0.802746	0.807519	0.0409467	0.0417186	1	3228.62
MA0479.1 FOXH1	-6.18396	1	0.883534	0.888299	0.0429602	0.0415477	1	3206.86
TA0398_Cebpb_DBD_dimer	-6.22211	1	0.845029	0.849315	0.0379649	0.0371525	1	3211.59
HU0029_MZF1	-6.22864	1	0.919129	0.926643	0.0647508	0.0651376	1	3223.09
AJ_TEAD4::ELK3	-6.25112	1	0.766486	0.769951	0.0283748	0.0299685	1	3245.07
AJ_SOX6	-6.23943	1	0.831615	0.835767	0.0364675	0.0359054	1	3214.07
AJ_HOXB13::TBX3_001	-6.24401	1	0.804867	0.808616	0.0329051	0.0323946	1	3214.03
NR2E1_HUMAN.H10MO.D	-6.25323	1	0.748414	0.75294	0.0391066	0.0390624	1	3220.07
NFAC1_HUMAN.H10MO.A	-6.25504	1	0.85968	0.8642	0.0392272	0.0389985	1	3218.09
TA0174_HSFY2_DBD_trimer	-6.2571	1	0.797646	0.801185	0.0307628	0.0305176	1	3217.19
TA0192_MEIS1_DBD_monomer	-6.23009	1	0.980838	0.983235	0.0237048	0.0206617	1	3169.83
MA0498.2 MEIS1	-6.23009	1	0.980838	0.983235	0.0237048	0.0206617	1	3169.83
MA0072.1 RORA.var.2	-6.30462	1	0.825133	0.830034	0.0399781	0.0420299	1	3242.9
AJ_HOXB2::RFX5_003	-6.30017	1	0.792319	0.796392	0.0340328	0.0349278	1	3231.85
PAX2_HUMAN.H10MO.D	-6.30619	1	0.820038	0.823013	0.0244778	0.0255063	1	3238.76
AJ_TEAD4::FOXI1_004	-6.28975	1	0.784353	0.787895	0.0318085	0.0303446	1	3201.52
DPRX_HUMAN.H10MO.D	-6.31298	1	0.85882	0.863817	0.0436991	0.0426871	1	3210.86
TA0606_LHX6_full_dimer	-6.32563	1	0.791046	0.795684	0.0399723	0.0395662	1	3216.27
BU0023 Gata6_primary	-6.34451	1	0.843653	0.848207	0.0398761	0.0387057	1	3208.31
MA0102.1 Cebpa	-6.35115	1	0.896115	0.899439	0.0288138	0.0282305	1	3212.06
MA0611.1 Dux	-6.35515	1	0.913827	0.920791	0.0607768	0.0590868	1	3208.94
TA0197_Meis2_DBD_monomer	-6.34984	1	0.970387	0.973377	0.0280709	0.0253153	1	3181.11
CEBPB_HUMAN.H10MO.A	-6.36575	1	0.85981	0.864272	0.039449	0.0377769	1	3202.99
TA0319_TEAD3_DBD_dimer	-6.38383	1	0.807235	0.811415	0.0355646	0.0353295	1	3217.76
MA0466.1 CEBPB	-6.38319	1	0.868885	0.873421	0.0388786	0.0383446	1	3214.77
TA0199_Meis3_DBD_monomer	-6.3773	1	0.968159	0.971114	0.0270021	0.0249428	1	3189.53
AJ_FOXJ3::TBX21_001	-6.38881	1	0.766739	0.770268	0.030871	0.029782	1	3205.88
LEF1_HUMAN.H10MO.C	-6.38745	1	0.968622	0.972755	0.03751	0.0348359	1	3191.48
TA0511_DPRX_DBD_monomer	-6.41868	1	0.911545	0.915346	0.0323454	0.0319539	1	3215.46
AJ_RFX3::BHLHA15	-6.42917	1	0.773024	0.776551	0.0286724	0.029643	1	3235.16
HOMEO0117_Nkx2-6_3437.1	-6.42978	1	0.824117	0.828307	0.0346131	0.0351938	1	3227.73
MA0906.1 HOXC12	-6.416	1	0.833342	0.837997	0.0422719	0.0390526	1	3189.58
TA0803_SOX21_DBD_dimer	-6.44054	1	0.783527	0.788873	0.0448033	0.0448036	1	3220.56
HOMEO0107_Mrg2_2302.1	-6.43532	1	0.82493	0.829428	0.0390591	0.0376798	1	3205.87
TA0159_GATA4_DBD_monomer	-6.43146	1	0.944416	0.948578	0.0369883	0.0348595	1	3196.9
TA0168_Tcf7_DBD_monomer	-6.44858	1	0.822936	0.827756	0.0396464	0.0403747	1	3228.41
MA0769.1 Tcf7	-6.44858	1	0.822936	0.827756	0.0396464	0.0403747	1	3228.41
TA0572_HOXC12_DBD_monomer	-6.44074	1	0.833407	0.838079	0.0422812	0.0390465	1	3189.44
TA0388_CEBPB_full_dimer	-6.46771	1	0.852082	0.856446	0.0372658	0.0363959	1	3210.78
TA0166_SOX9_DBD_monomer	-6.4787	1	0.916091	0.920688	0.0396694	0.0382542	1	3205.72
AJ_MEIS1::ONECUT2	-6.49356	1	0.774723	0.778942	0.034061	0.0351099	1	3233.82
MA0842.1 NRL	-6.49612	1	0.899792	0.903663	0.031179	0.032195	1	3234.6
AJ_TEAD4::TBX21_001	-6.49221	1	0.838715	0.842841	0.0340788	0.0343113	1	3223.46
AJ_HOXA3::EOMES	-6.49266	1	0.819805	0.823919	0.0343878	0.0342	1	3218.25
TA0424_NRL_DBD_monomer	-6.50302	1	0.899746	0.903623	0.0311956	0.0322107	1	3234.58
TA0569_HOXC11_full_monomer	-6.51806	1	0.84939	0.854114	0.0415044	0.0390384	1	3196.16
BU0046 Mybl1_primary	-6.53471	1	0.811157	0.815252	0.0339138	0.0338274	1	3219.47
MA0651.1 HOXC11	-6.53063	1	0.849454	0.854187	0.0415073	0.0390383	1	3196.14
NR1I2_HUMAN.H10MO.S	-6.54274	1	0.958926	0.962192	0.0279593	0.0269097	1	3204.96
HME2_HUMAN.H10MO.D	-6.57664	1	0.90922	0.911863	0.0213532	0.0217057	1	3227.61
AJ_GCM1::HOXB13_003	-6.58426	1	0.785349	0.789418	0.0330042	0.0333646	1	3225.21
AJ_MEIS1::HOXA13	-6.59493	1	0.818709	0.82284	0.0347041	0.0337858	1	3209.5
MA0719.1 RHOXF1	-6.60555	1	0.981236	0.983249	0.0168389	0.0164389	1	3210.61
AJ_GATA1	-6.59542	1	0.952556	0.95875	0.0546433	0.0505577	1	3190.12
TA0667_RHOXF1_DBD_monomer	-6.61039	1	0.981251	0.98327	0.0168749	0.0164752	1	3210.64
AJ_ETV2::EVX1	-6.62239	1	0.804171	0.807951	0.0298958	0.0308404	1	3234.17
TA0670_Rhox11_DBD_monomer	-6.63355	1	0.939921	0.943069	0.0275341	0.0255516	1	3191.2
TA0592_Hoxd9_DBD_monomer	-6.63696	1	0.901998	0.905712	0.032043	0.030138	1	3196.15
AJ_TEAD4::CEBPD_001	-6.64846	1	0.774984	0.778721	0.0308807	0.030329	1	3213.05
BU0045 Myb_primary	-6.65311	1	0.814844	0.81898	0.0336976	0.0335501	1	3218.7
ETV3_HUMAN.H10MO.D	-6.6617	1	0.881581	0.884576	0.0235239	0.0242975	1	3234.74
BU0006 Bcl6b_primary	-6.66056	1	0.820854	0.825077	0.0359227	0.0341632	1	3200.33
TYY1_HUMAN.H10MO.A	-6.70146	1	0.834026	0.839865	0.0420081	0.0471947	1	3276.34
NR1D1_HUMAN.H10MO.C	-6.68217	1	0.838923	0.84333	0.0352717	0.0356135	1	3224.68
AJ_TEAD4::PITX1_001	-6.69649	1	0.814272	0.818341	0.0338376	0.0327636	1	3207.33
MA0124.2 Nkx3-1	-6.70288	1	0.890706	0.895786	0.041266	0.0409	1	3216.81
TA0641_Nkx3-1_DBD_monomer	-6.71068	1	0.890484	0.895581	0.0413557	0.0409878	1	3216.8
CEBPA_HUMAN.H10MO.A	-6.7086	1	0.860616	0.865274	0.0384819	0.0374396	1	3209.24
TA0656_PITX3_DBD_monomer	-6.72062	1	0.915459	0.921048	0.0450051	0.044886	1	3219.43
TA0872_HOXD12_DBD_monomer	-6.70392	1	0.857377	0.861993	0.0401654	0.0370642	1	3189.17
MA0714.1 PITX3	-6.7256	1	0.915485	0.921079	0.0450181	0.0448933	1	3219.38
AJ_HOXC10::EOMES	-6.73692	1	0.829174	0.832993	0.0311408	0.0305759	1	3212.94
TA0708_NR2E1_full_dimer	-6.75452	1	0.824258	0.8284	0.0318016	0.0331461	1	3238.88
AJ_TEAD4::DLX2_002	-6.74115	1	0.790177	0.794521	0.0355874	0.0347581	1	3210.8
AJ_CUX1::RFX5_002	-6.75507	1	0.709424	0.713421	0.0322231	0.0319229	1	3216.62
MA0523.1 TCF7L2	-6.77027	1	0.871063	0.875521	0.0354621	0.0355505	1	3221.61
MA0002.1 RUNX1	-6.76807	1	0.890748	0.895222	0.0361353	0.0356704	1	3215.14
AJ_HOXB2::TBX21_003	-6.79088	1	0.84475	0.848675	0.0308112	0.0312131	1	3226.12
BU0061 Sox11_primary	-6.79504	1	0.868675	0.873304	0.0365542	0.0367778	1	3223.15
TA0805_SOX2_DBD_dimer	-6.85195	1	0.761878	0.767545	0.0450293	0.0446326	1	3216.84
MEF2A_HUMAN.H10MO.A	-6.85105	1	0.856673	0.861525	0.0403146	0.0381539	1	3198.48
TA0402_DBP_DBD_dimer	-6.86701	1	0.821058	0.826466	0.0442195	0.0424517	1	3203.97
MA0102.2 CEBPA	-6.87389	1	0.916832	0.920505	0.0296004	0.0288232	1	3209.58
TA0149_SPDEF_DBD_monomer	-6.90922	1	0.802599	0.806955	0.0332103	0.0340595	1	3231.54
PITX2_HUMAN.H10MO.D	-6.91692	1	0.926821	0.931901	0.0387881	0.0396663	1	3230.26
AJ_TEAD4::CEBPD_004	-6.95158	1	0.764564	0.768468	0.029225	0.0303541	1	3237.26
TA0654_PITX1_DBD_monomer	-6.95254	1	0.916482	0.922382	0.0458799	0.0458014	1	3219.83
TA0216_NFATC1_full_dimer	-6.96054	1	0.771601	0.776584	0.0380492	0.0386651	1	3227.47
BU0022 Gata5_primary	-6.96695	1	0.817283	0.82231	0.0397372	0.0389229	1	3211.96
TA0406_Hlf_DBD_dimer	-6.96832	1	0.8022	0.807875	0.045666	0.0438965	1	3204.47
AJ_ALX4::EOMES	-6.97342	1	0.765824	0.7697	0.030994	0.0299758	1	3206.87
MA0095.2 YY1	-7.04417	1	0.847859	0.853992	0.0426177	0.0471443	1	3268.13
AJ_HOXB2::PITX1_003	-7.01775	1	0.833	0.837009	0.0315609	0.030819	1	3210.71
MA0766.1 GATA5	-7.01029	1	0.943725	0.948287	0.0377404	0.0350398	1	3191.37
TA0160_GATA5_DBD_monomer	-7.02027	1	0.943742	0.948312	0.0377543	0.0350451	1	3191.3
MA0495.1 MAFF	-7.05118	1	0.811282	0.81573	0.0337125	0.0340645	1	3225
TA0415_MAFK_DBD_monomer	-7.06991	1	0.889346	0.894161	0.0359029	0.036797	1	3231.25
MA0108.1 TBP	-7.05332	1	0.874566	0.879105	0.0367387	0.0346663	1	3197.36
GATA6_HUMAN.H10MO.B	-7.06621	1	0.858025	0.863054	0.0394834	0.0383813	1	3208.9
MA0143.1 Sox2	-7.07931	1	0.812478	0.816934	0.0345836	0.0339548	1	3212.92
TA0417_MAFK_full_monomer	-7.10745	1	0.879688	0.88428	0.0344367	0.03489	1	3226.17
MAFF_HUMAN.H10MO.A	-7.10481	1	0.75916	0.763615	0.0338079	0.0338449	1	3221.02
MA0143.2 Sox2	-7.11002	1	0.813147	0.817611	0.0345433	0.0338667	1	3212.34
HOMEO0016_Cutl1_3494.1	-7.11973	1	0.806801	0.810911	0.0309331	0.0311643	1	3223.73
AJ_HOXB2::ESRRB_001	-7.11974	1	0.770324	0.775123	0.0364606	0.0363786	1	3219.6
TA0404_Dbp_DBD_dimer	-7.14396	1	0.806943	0.812848	0.0460705	0.0445686	1	3206.98
HXA9_HUMAN.H10MO.D	-7.15541	1	0.829535	0.833955	0.0347127	0.0332891	1	3203.55
MA0122.2 NKX3-2	-7.16271	1	0.900517	0.90587	0.0408524	0.0403183	1	3215.05
HOMEO0168_Six6_2267.5	-7.17273	1	0.803295	0.808157	0.0362642	0.0365996	1	3224.49
HOMEO0004_Bapx1_2343.1	-7.17638	1	0.828217	0.83286	0.0345034	0.034934	1	3225.88
PITX1_HUMAN.H10MO.D	-7.18298	1	0.870514	0.8784	0.0578369	0.0593089	1	3231.49
TA0635_NKX3-2_DBD_monomer	-7.17755	1	0.900504	0.905869	0.0408664	0.0403307	1	3215.04
MA0496.1 MAFK	-7.18559	1	0.846998	0.851894	0.0366156	0.0367778	1	3222.44
HOMEO0069_Hoxc12_3480.1	-7.18472	1	0.799052	0.803802	0.0378522	0.0356143	1	3196.28
MA0108.2 TBP	-7.18752	1	0.874842	0.879425	0.0364273	0.0343469	1	3197.08
TA0363_NEUROD2_full_dimer	-7.22641	1	0.897369	0.901716	0.0316398	0.0324984	1	3232.22
[truncated: 1,043 more rows]

## Sheet: Cluster2
MATRIX_ID	Z_SCORE	P_VALUE	SAMPLE_AVERAGE	BACKGROUND_AVERAGE	SAMPLE_STDDEV	BACKGROUND_STDDEV	P_WELCH	df_WELCH
AJ_GCM2::FIGLA_001	7.91535	9.16799e-16	0.808304	0.798277	0.0361898	0.0332651	4.31303e-13	704.271
TA0334_Tcfap2a_DBD_dimer	7.65137	8.05155e-15	0.900278	0.88849	0.0384396	0.0405016	1.68558e-15	707.194
AJ_GCM1::FIGLA_008	7.55737	1.58675e-14	0.797397	0.787205	0.0377371	0.0354197	1.52333e-12	704.668
GN_KLF5_TOP5000	7.36961	7.19168e-14	0.9545	0.944675	0.0313376	0.0350607	4.46625e-16	708.757
AJ_GCM1::FIGLA_005	7.35895	7.56818e-14	0.818752	0.808144	0.0366227	0.0378894	4.40843e-14	706.755
AP2B_HUMAN.H10MO.B	7.32771	9.72848e-14	0.939341	0.929304	0.0334006	0.036013	5.67856e-15	707.772
TA0863_TFAP2A_DBD_dimer	7.32019	1.0195e-13	0.89504	0.884014	0.0376755	0.0395972	2.51343e-14	707.133
AJ_GCM1::FIGLA::010	7.30284	1.12513e-13	0.823394	0.813172	0.0377319	0.0367743	1.32905e-12	705.427
BU0088 Tcfap2e_primary	7.14131	3.87892e-13	0.879303	0.868409	0.0371447	0.0401115	2.2561e-14	707.812
ZN148_HUMAN.H10MO.D	7.09032	5.776e-13	0.899266	0.883086	0.0512366	0.0600306	2.90751e-16	710.094
MA0810.1 TFAP2A.var.2	6.98891	1.15445e-12	0.909443	0.899051	0.0376874	0.0390855	5.70803e-13	706.813
TA0322_TFAP2A_DBD_dimer	6.98607	1.17842e-12	0.909514	0.899138	0.0376257	0.0390424	5.67392e-13	706.825
MA0524.2 TFAP2C	6.91655	1.95529e-12	0.893012	0.882866	0.0361199	0.0385688	2.25885e-13	707.525
TA0328_TFAP2C_DBD_dimer	6.91308	2.004e-12	0.892865	0.882711	0.0361653	0.0386177	2.31633e-13	707.526
TA0325_TFAP2B_DBD_dimer	6.91151	2.02122e-12	0.896838	0.886698	0.0364061	0.0385717	3.47295e-13	707.33
MA0811.1 TFAP2B	6.89789	2.22579e-12	0.896718	0.886592	0.0364452	0.0385929	3.93814e-13	707.317
TA0329_TFAP2C_DBD_dimer	6.86104	2.84922e-12	0.902895	0.891935	0.0412105	0.0419866	3.225e-12	706.399
MA0814.1 TFAP2C.var.2	6.85828	2.90488e-12	0.902696	0.891723	0.0412853	0.0420504	3.33043e-12	706.392
MA0812.1 TFAP2B.var.2	6.83901	3.33198e-12	0.89741	0.885697	0.0440116	0.0450119	3.14464e-12	706.486
AJ_TFAP2C::E2F8	6.83594	3.40143e-12	0.814994	0.80295	0.0453992	0.0463083	3.62462e-12	706.425
TA0326_TFAP2B_DBD_dimer	6.8271	3.62208e-12	0.89751	0.885826	0.0439999	0.0449833	3.46814e-12	706.478
MA0470.1 E2F4	6.75483	5.98563e-12	0.903095	0.889697	0.0513351	0.0521265	7.66377e-12	706.322
TA0862_TFAP2A_DBD_dimer	6.71042	8.16708e-12	0.900672	0.889564	0.0424607	0.0435078	6.89979e-12	706.53
AJ_ETV2::TCF3	6.6728	1.00017e-11	0.810485	0.801522	0.0397099	0.03526	2.29082e-09	703.649
TA0219_NFKB1_DBD_dimer	6.64619	1.22222e-11	0.774594	0.762845	0.0501822	0.0464235	6.26676e-10	704.391
MA0105.4 NFKB1	6.64619	1.22222e-11	0.774594	0.762845	0.0501822	0.0464235	6.26676e-10	704.391
AJ_GCM1::TBX21_001	6.60218	1.73336e-11	0.826344	0.816772	0.0359452	0.0381153	3.09234e-12	707.351
AJ_GCM2::TBX21_001	6.56634	2.12335e-11	0.830622	0.821848	0.0371477	0.0350998	4.52952e-10	704.798
BU0086 Tcfap2b_primary	6.5529	2.42308e-11	0.862794	0.853259	0.0359183	0.0382567	3.57318e-12	707.462
AJ_GCM1::NHLH1_002	6.51524	3.09591e-11	0.829292	0.8214	0.0307012	0.0318416	1.50797e-11	706.814
TA0039_Egr3_DBD_monomer	6.45319	4.73245e-11	0.797333	0.786456	0.041348	0.044314	5.46114e-12	707.618
AHR_HUMAN.H10MO.B	6.41117	6.11986e-11	0.899484	0.887816	0.0478147	0.0478246	1.31019e-10	705.984
TA0857_EGR4_DBD_monomer	6.40277	6.47153e-11	0.789892	0.780382	0.0389736	0.0390305	1.31427e-10	706.012
RFX1_HUMAN.H10MO.C	6.28112	1.40414e-10	0.885784	0.877953	0.0348336	0.0327478	2.65286e-09	704.699
MA0003.3 TFAP2A	6.28296	1.44328e-10	0.911472	0.90162	0.038735	0.0412253	2.41363e-11	707.443
TA0323_TFAP2A_DBD_dimer	6.28232	1.44936e-10	0.911403	0.901554	0.0387227	0.0412164	2.41356e-11	707.446
KLF13_HUMAN.H10MO.D	6.24013	1.88876e-10	0.911785	0.898066	0.0557679	0.0577917	9.56315e-11	706.794
AJ_GCM1::MAX_005	6.21388	2.18745e-10	0.743189	0.734971	0.0359762	0.0347433	1.53854e-09	705.237
TA0036_EGR2_full_monomer	6.18047	2.81265e-10	0.841059	0.830586	0.0405588	0.044561	1.26464e-11	708.264
AJ_GCM2::FIGLA_002	6.17773	2.83155e-10	0.818271	0.809785	0.0342304	0.0361122	7.03708e-11	707.225
TA0333_TFAP2C_full_dimer	6.13212	3.76678e-10	0.910655	0.90205	0.0355212	0.0368859	1.7673e-10	706.843
E2F6_HUMAN.H10MO.C	6.10628	4.46233e-10	0.907078	0.897601	0.0384147	0.0408018	8.61487e-11	707.392
TA0034_EGR1_full_monomer	6.03209	7.14666e-10	0.797718	0.787052	0.0427648	0.0464906	5.56604e-11	707.985
TA0062_SP8_DBD_monomer	5.99918	8.45474e-10	0.908576	0.899454	0.0418353	0.0399428	7.3598e-09	705.005
AJ_ETV5::HES7_002	5.99844	8.60754e-10	0.827452	0.817975	0.0416307	0.0415171	1.7479e-09	705.919
MA0747.1 SP8	5.99364	8.75098e-10	0.908567	0.899452	0.041842	0.039951	7.57244e-09	705.006
TA0331_TFAP2C_full_dimer	5.99401	8.99598e-10	0.896397	0.888225	0.0338194	0.0358403	1.96798e-10	707.337
AJ_GCM2::E2F8	5.95722	1.09277e-09	0.792475	0.786	0.0302011	0.0285506	1.25476e-08	704.808
MA0697.1 ZIC3	5.96038	1.10104e-09	0.819298	0.810406	0.0378145	0.0392142	5.49502e-10	706.811
TA0071_ZIC3_full_monomer	5.95531	1.136e-09	0.819342	0.810458	0.0378195	0.0392151	5.69398e-10	706.808
MA0732.1 EGR3	5.92659	1.38058e-09	0.818134	0.807052	0.0439646	0.0491794	3.59479e-11	708.752
TA0037_EGR3_DBD_monomer	5.92477	1.39626e-09	0.817952	0.806859	0.0439998	0.0492433	3.56732e-11	708.766
MA0741.1 KLF16	5.92154	1.40228e-09	0.913076	0.902049	0.0466381	0.0489551	4.48995e-10	707.102
TA0053_KLF16_DBD_monomer	5.91548	1.45523e-09	0.9132	0.902198	0.0465852	0.0488953	4.68041e-10	707.1
TA0335_Tcfap2a_DBD_dimer	5.87942	1.8047e-09	0.909102	0.899528	0.0415411	0.0427999	1.14161e-09	706.658
EGR2_HUMAN.H10MO.C	5.88192	1.81031e-09	0.910076	0.898507	0.0465758	0.051725	6.62036e-11	708.554
MA0469.1 E2F3	5.87542	1.85416e-09	0.878999	0.867709	0.048516	0.0505129	8.06199e-10	706.906
TFDP1_HUMAN.H10MO.D	5.85456	2.12312e-09	0.847569	0.834287	0.055269	0.0596494	2.44385e-10	707.797
MA0599.1 KLF5	5.85566	2.1484e-09	0.962068	0.952801	0.0354477	0.0416312	7.51993e-12	710.166
AJ_ETV5::TCF3_001	5.82828	2.35954e-09	0.823974	0.816347	0.0383601	0.0343572	1.12391e-07	703.801
MA0155.1 INSM1	5.80426	2.83919e-09	0.894714	0.887286	0.0328259	0.0336365	2.16788e-09	706.531
AJ_GCM1::ERG	5.79252	3.08758e-09	0.840307	0.832134	0.0342757	0.0370987	3.29863e-10	707.871
BU0103 Zic3_primary	5.78571	3.1591e-09	0.788031	0.777638	0.0468771	0.0472074	4.31733e-09	706.135
AJ_TFAP2C::ELK1	5.77818	3.32999e-09	0.791871	0.782824	0.0396855	0.0411566	1.68042e-09	706.812
ZBT7B_HUMAN.H10MO.D	5.7616	3.50793e-09	0.790384	0.781585	0.0453681	0.0400916	2.17026e-07	703.567
KLF16_HUMAN.H10MO.D	5.77016	3.51038e-09	0.840648	0.826591	0.0605563	0.0640446	8.8742e-10	707.286
TBX15_HUMAN.H10MO.D	5.76123	3.73077e-09	0.823734	0.808798	0.0623896	0.06817	2.84212e-10	708.118
AJ_GCM1::FIGLA_001	5.74264	4.16761e-09	0.827712	0.819523	0.0343163	0.0374985	3.20688e-10	708.12
AJ_TEAD4::HES7_002	5.71537	4.80478e-09	0.799002	0.792017	0.0318753	0.0321145	6.36383e-09	706.145
MA0079.2 SP1	5.70756	5.18931e-09	0.954136	0.944799	0.0373095	0.0430327	4.92231e-11	709.625
AJ_E2F1::NHLH1	5.69406	5.41924e-09	0.765819	0.756707	0.0426455	0.0420463	1.41141e-08	705.672
MA0528.1 ZNF263	5.68862	5.59955e-09	0.874541	0.865284	0.0432692	0.0427614	1.35323e-08	705.722
KLF14_HUMAN.H10MO.D	5.6766	6.05811e-09	0.86824	0.856596	0.0529328	0.053914	5.59918e-09	706.392
AJ_HOXB2::TCF3_001	5.62661	7.82916e-09	0.82359	0.81613	0.0389049	0.0348073	2.92111e-07	703.782
BU0097 Zfp281_primary	5.63084	8.06968e-09	0.875199	0.861651	0.057306	0.0632748	4.5773e-10	708.397
MA0733.1 EGR4	5.62343	8.28078e-09	0.816712	0.808271	0.0385796	0.0394512	6.6995e-09	706.483
TA0038_EGR4_DBD_monomer	5.61759	8.56744e-09	0.8169	0.808473	0.0385576	0.0394258	6.94554e-09	706.481
AJ_GCM1::MAX_002	5.5759	1.08246e-08	0.729498	0.722334	0.034134	0.0337605	2.4376e-08	705.739
E2F1_HUMAN.H10MO.A	5.53834	1.35766e-08	0.876811	0.869615	0.0331779	0.0341508	8.89096e-09	706.635
AJ_TFAP4::FLI1_001	5.51719	1.54137e-08	0.780538	0.772388	0.0368234	0.0388326	4.63259e-09	707.216
KLF6_HUMAN.H10MO.D	5.51416	1.57851e-08	0.970512	0.96394	0.0288313	0.0313403	1.70669e-09	707.983
MAZ_HUMAN.H10MO.A	5.51394	1.58376e-08	0.828994	0.815008	0.0607639	0.0666971	1.21875e-09	708.239
TA0033_EGR1_DBD_monomer	5.46782	2.06703e-08	0.83198	0.822399	0.0412349	0.0460799	8.73997e-10	708.724
MA0632.1 Tcfl5	5.43561	2.47808e-08	0.929985	0.919893	0.0438972	0.048826	1.27492e-09	708.596
AJ_TEAD4::FIGLA_003	5.4065	2.80862e-08	0.836881	0.829224	0.0396254	0.0371967	2.41735e-07	704.67
TA0220_NFKB2_DBD_dimer	5.38266	3.19214e-08	0.805505	0.795949	0.0507481	0.0466226	4.60932e-07	704.261
MA0778.1 NFKB2	5.38266	3.19214e-08	0.805505	0.795949	0.0507481	0.0466226	4.60932e-07	704.261
HU0013_ZNF467	5.37514	3.4784e-08	0.861843	0.85191	0.043791	0.0485989	2.04054e-09	708.535
BU0102 Zic2_primary	5.33276	4.29531e-08	0.784107	0.774399	0.0484765	0.0478362	9.39159e-08	705.69
WT1_HUMAN.H10MO.D	5.30527	5.15137e-08	0.891209	0.88066	0.0458602	0.0523029	1.25763e-09	709.298
MA0003.1 TFAP2A	5.28956	5.65464e-08	0.970747	0.964534	0.026036	0.0309015	3.30916e-10	710.491
KLF4_HUMAN.H10MO.A	5.27608	5.97221e-08	0.953016	0.943922	0.0425371	0.0453156	1.41135e-08	707.467
ZKSC1_HUMAN.H10MO.C	5.26657	6.05714e-08	0.740625	0.733505	0.0391969	0.0354984	1.08273e-06	703.999
SP1_HUMAN.H10MO.C	5.27229	6.15468e-08	0.852397	0.840399	0.053495	0.0598488	3.01556e-09	708.756
MA0472.2 EGR2	5.24443	7.12882e-08	0.842017	0.833257	0.0404357	0.0439178	9.36924e-09	707.961
TA0035_EGR2_DBD_monomer	5.24249	7.20476e-08	0.841993	0.833236	0.0404414	0.0439218	9.49492e-09	707.96
CXXC1_HUMAN.H10MO.D	5.2363	7.35272e-08	0.960614	0.955197	0.0267556	0.0271885	6.98396e-08	706.339
MA0006.1 Ahr::Arnt	5.21229	8.48627e-08	0.963703	0.954042	0.0450272	0.0487347	1.26765e-08	707.87
AJ_ERF::NHLH1	5.20341	8.72353e-08	0.797742	0.791019	0.0346263	0.0339472	2.15205e-07	705.551
MA0039.1 Klf4	5.19722	9.10621e-08	0.959565	0.955179	0.0216813	0.0221826	7.14012e-08	706.495
PLAG1_HUMAN.H10MO.S	5.18463	9.66374e-08	0.914712	0.909566	0.0265321	0.0260814	2.20779e-07	705.608
MA0509.1 Rfx1	5.16613	1.01375e-07	0.83401	0.825907	0.0506223	0.0411381	1.42896e-05	702.241
RELB_HUMAN.H10MO.C	5.17194	1.02629e-07	0.899056	0.89336	0.0305049	0.0289285	5.69895e-07	704.87
TA0087_Zic3_DBD_monomer	5.16236	1.09984e-07	0.808491	0.800691	0.0387015	0.0397117	7.95483e-08	706.562
BU0076 Sp4_primary	5.13775	1.26315e-07	0.872021	0.86189	0.0489516	0.0518408	3.7515e-08	707.32
MA0472.1 EGR2	5.12929	1.3284e-07	0.897174	0.888734	0.0397521	0.0432683	1.75528e-08	708.017
AJ_TFAP2C::DRGX	5.1207	1.36897e-07	0.816803	0.810535	0.0320374	0.0321678	1.76923e-07	706.069
ZN219_HUMAN.H10MO.D	5.11661	1.42523e-07	0.898496	0.88938	0.042402	0.0468512	1.19779e-08	708.416
MA0162.2 EGR1	5.0921	1.61398e-07	0.903265	0.89392	0.0451663	0.0482535	3.78319e-08	707.539
SP2_HUMAN.H10MO.C	5.07805	1.75231e-07	0.827745	0.815681	0.0559898	0.0624817	1.11749e-08	708.686
AJ_TEAD4::ELK1_001	5.06636	1.81815e-07	0.745284	0.739283	0.0317599	0.0311218	4.28745e-07	705.541
BU0101 Zic1_primary	5.02011	2.33724e-07	0.796491	0.786842	0.0497313	0.0505152	2.20644e-07	706.33
MA0516.1 SP2	4.99969	2.64124e-07	0.900773	0.89151	0.044069	0.0487201	2.39721e-08	708.431
TA0327_TFAP2B_DBD_dimer	4.9953	2.68255e-07	0.858397	0.849435	0.0445167	0.0471688	8.24548e-08	707.332
MA0813.1 TFAP2B.var.3	4.98763	2.79191e-07	0.858335	0.849384	0.0445263	0.0471781	8.60866e-08	707.332
AJ_MYBL1::MAX_002	4.96979	2.90633e-07	0.776076	0.769664	0.0402484	0.0338544	1.56044e-05	702.759
SP3_HUMAN.H10MO.B	4.95611	3.31159e-07	0.847696	0.836158	0.0554803	0.0612187	3.29155e-08	708.379
E2F5_HUMAN.H10MO.B	4.89246	4.50652e-07	0.858708	0.850328	0.0454478	0.0450071	7.75824e-07	705.767
TA0324_TFAP2A_DBD_dimer	4.88954	4.63973e-07	0.882255	0.872805	0.0475187	0.0508175	1.15595e-07	707.564
TA0776_ZNF282_DBD_monomer	4.88045	4.80845e-07	0.788637	0.782331	0.0336956	0.0339554	5.45574e-07	706.15
E2F4_HUMAN.H10MO.A	4.87797	4.8912e-07	0.855061	0.848214	0.0357605	0.0368965	3.10564e-07	706.691
EGR1_HUMAN.H10MO.S	4.85909	5.45836e-07	0.889734	0.879402	0.0499944	0.0559192	3.97207e-08	708.749
TA0060_SP3_DBD_monomer	4.82939	6.24553e-07	0.922929	0.914819	0.0433481	0.0441383	5.49474e-07	706.385
MA0746.1 SP3	4.82593	6.35606e-07	0.92306	0.914963	0.0433002	0.044096	5.5716e-07	706.388
HU0017_KLF10	4.81667	6.69531e-07	0.940877	0.931959	0.046401	0.0486678	2.8394e-07	707.083
AJ_ETV2::NHLH1_002	4.81595	6.70871e-07	0.764654	0.757411	0.0380481	0.0395336	3.6012e-07	706.857
MA0039.2 Klf4	4.81299	6.82031e-07	0.940794	0.931875	0.0464621	0.0487174	2.91694e-07	707.076
HU0012_KLF14	4.8129	6.82358e-07	0.940791	0.931871	0.046464	0.0487185	2.91985e-07	707.075
MA0024.1 E2F1	4.80114	7.16178e-07	0.874491	0.866254	0.045633	0.0450825	1.26761e-06	705.715
MA0024.2 E2F1	4.7903	7.58989e-07	0.916988	0.908179	0.0480027	0.0483265	8.70344e-07	706.129
MA0057.1 MZF1.var.2	4.77481	8.30834e-07	0.946571	0.941361	0.0264414	0.0286911	1.49014e-07	707.936
GSC2_HUMAN.H10MO.D	4.75134	9.3134e-07	0.918302	0.913127	0.0268774	0.0286371	2.7102e-07	707.471
MYOG_HUMAN.H10MO.D	4.74968	9.33446e-07	0.865146	0.857929	0.0388465	0.0399379	6.52818e-07	706.608
AJ_TEAD4::CLOCK_004	4.74291	9.58953e-07	0.800189	0.794753	0.0304067	0.0301173	1.57577e-06	705.771
MZF1_HUMAN.H10MO.D	4.74621	9.69823e-07	0.962154	0.956013	0.0288521	0.0340436	1.6598e-08	710.309
MA0600.1 RFX2	4.73158	9.74518e-07	0.811017	0.804017	0.0468708	0.0388124	4.66913e-05	702.519
AJ_E2F3::TBX21_002	4.73431	9.87891e-07	0.749079	0.742332	0.0403324	0.0374313	6.28087e-06	704.452
MA0163.1 PLAG1	4.73897	9.87898e-07	0.836863	0.829495	0.0389606	0.0408738	4.24657e-07	707.089
BU0039 Klf7_primary	4.73721	9.90708e-07	0.879972	0.871771	0.0448784	0.045496	9.62219e-07	706.285
AJ_TFAP2C::HES7_001	4.7253	1.06128e-06	0.787081	0.779375	0.0399204	0.0428765	2.54856e-07	707.673
AJ_TFAP2C::MAX_003	4.71876	1.08577e-06	0.769146	0.762306	0.03756	0.0380959	1.04135e-06	706.296
AJ_ETV2::HES7_001	4.68252	1.2677e-06	0.771618	0.764648	0.043475	0.0390751	1.40742e-05	703.863
MA0740.1 KLF14	4.68435	1.27357e-06	0.851338	0.842785	0.0499769	0.0479613	4.00409e-06	705.109
TA0052_KLF14_DBD_monomer	4.68394	1.27616e-06	0.851113	0.842548	0.050048	0.0480336	4.00451e-06	705.11
BU0087 Tcfap2c_primary	4.68623	1.28422e-06	0.875644	0.869346	0.033332	0.0353283	4.3661e-07	707.34
SPIC_HUMAN.H10MO.D	4.67423	1.3641e-06	0.947821	0.943815	0.0210776	0.022536	3.7578e-07	707.558
HTF4_HUMAN.H10MO.B	4.66154	1.44881e-06	0.943148	0.937245	0.0315145	0.0332921	5.37993e-07	707.259
INSM1_HUMAN.H10MO.C	4.64445	1.55749e-06	0.857234	0.850512	0.0384532	0.0380292	2.57469e-06	705.738
MA0014.2 PAX5	4.63708	1.61116e-06	0.840596	0.836015	0.0265446	0.0259579	3.36579e-06	705.498
MA0696.1 ZIC1	4.63779	1.61356e-06	0.809545	0.80244	0.0400486	0.0402634	1.86984e-06	706.098
TA0070_ZIC1_full_monomer	4.63709	1.61923e-06	0.809528	0.80242	0.0400461	0.0402855	1.85141e-06	706.112
AJ_HOXB2::NHLH1_002	4.58445	2.09527e-06	0.827112	0.822281	0.0271086	0.0276948	1.70323e-06	706.461
TBX1_HUMAN.H10MO.D	4.56603	2.31422e-06	0.807281	0.79795	0.049024	0.0537357	3.65974e-07	708.202
ELF3_HUMAN.H10MO.D	4.53367	2.5632e-06	0.876845	0.871021	0.0406587	0.0336986	8.88849e-05	702.533
MA0003.2 TFAP2A	4.53529	2.67843e-06	0.856926	0.850097	0.0363525	0.0395984	5.03502e-07	708.037
COE1_HUMAN.H10MO.A	4.5308	2.70661e-06	0.870569	0.864116	0.0369056	0.0374292	2.57367e-06	706.294
MA0685.1 SP4	4.51624	2.91905e-06	0.825998	0.817301	0.047968	0.0506218	1.16252e-06	707.233
AJ_GCM1::FIGLA_009	4.5089	3.02852e-06	0.815993	0.809823	0.0336471	0.0359764	8.96221e-07	707.559
TA0061_SP4_full_monomer	4.50676	3.05304e-06	0.826133	0.81746	0.0479758	0.0505902	1.2413e-06	707.214
AJ_GCM1::ELK3_002	4.50283	3.13349e-06	0.784279	0.777319	0.0366057	0.0406508	3.76124e-07	708.552
TLX1_HUMAN.H10MO.S	4.48807	3.26607e-06	0.933767	0.929346	0.0277891	0.0258723	1.61881e-05	704.512
MA1099.1 Hes1	4.47536	3.54771e-06	0.902923	0.895669	0.0399466	0.0426133	1.12288e-06	707.501
AJ_MYBL1::FIGLA_003	4.46997	3.57021e-06	0.808321	0.803177	0.03186	0.0302291	1.2412e-05	704.88
ZIC4_HUMAN.H10MO.D	4.46968	3.63294e-06	0.806056	0.798993	0.0397407	0.0415409	1.81171e-06	707.001
AJ_GCM1::FIGLA_003	4.46186	3.78444e-06	0.816894	0.810499	0.035054	0.0376825	1.01129e-06	707.695
THA_HUMAN.H10MO.C	4.444	4.08852e-06	0.824375	0.819419	0.0284948	0.0293122	2.88518e-06	706.621
MA0162.1 Egr1	4.40001	5.07407e-06	0.884572	0.877674	0.0370724	0.0412289	6.39248e-07	708.592
TA0306_TBX21_DBD_dimer	4.38575	5.28482e-06	0.748992	0.743253	0.0365107	0.0343689	2.01097e-05	704.725
KLF12_HUMAN.H10MO.D	4.36668	5.82701e-06	0.890789	0.883908	0.0415741	0.0414137	7.80738e-06	705.895
EPAS1_HUMAN.H10MO.D	4.3633	5.97421e-06	0.912014	0.90583	0.035121	0.037259	2.2309e-06	707.363
BU0085 Tcfap2a_primary	4.34958	6.36048e-06	0.884663	0.878999	0.032363	0.034232	2.54132e-06	707.29
MA0751.1 ZIC4	4.33955	6.63417e-06	0.837296	0.831227	0.0357145	0.0367625	4.66202e-06	706.636
TA0072_ZIC4_DBD_monomer	4.33804	6.68129e-06	0.837235	0.831164	0.0357017	0.0367876	4.5982e-06	706.66
BU0010 Egr1_primary	4.33817	6.74431e-06	0.850192	0.841743	0.0461773	0.0512177	9.50113e-07	708.519
SP4_HUMAN.H10MO.D	4.32548	7.13697e-06	0.795095	0.783389	0.0648805	0.0711649	1.3071e-06	708.22
BMAL1_HUMAN.H10MO.C	4.31719	7.22622e-06	0.815252	0.808468	0.0444851	0.0412722	3.35876e-05	704.446
SRBP2_HUMAN.H10MO.B	4.32133	7.24934e-06	0.897006	0.891317	0.032358	0.03461	2.30958e-06	707.568
ZN524_HUMAN.H10MO.D	4.31258	7.43035e-06	0.773244	0.767139	0.0385235	0.0371891	1.7461e-05	705.229
MA0815.1 TFAP2C.var.3	4.31481	7.45412e-06	0.849403	0.841326	0.0466517	0.04921	3.19133e-06	707.222
TA0330_TFAP2C_DBD_dimer	4.3144	7.46794e-06	0.849374	0.841295	0.0466733	0.0492271	3.20519e-06	707.219
MA0742.1 Klf12	4.3088	7.57111e-06	0.847601	0.840545	0.0441438	0.0430235	1.49827e-05	705.427
AJ_E2F3::ONECUT2_001	4.30633	7.6458e-06	0.750796	0.745147	0.0356749	0.0344585	1.77429e-05	705.241
TA0054_Klf12_DBD_monomer	4.29826	7.94326e-06	0.847658	0.84062	0.0441327	0.0430165	1.56357e-05	705.429
GLIS2_HUMAN.H10MO.D	4.28889	8.41093e-06	0.80466	0.797958	0.0380867	0.041087	2.26618e-06	707.785
AJ_GCM1::FIGLA_006	4.27128	9.0057e-06	0.803404	0.797895	0.034063	0.033891	1.21215e-05	705.868
MA0863.1 MTF1	4.25985	9.4316e-06	0.774052	0.768134	0.0379598	0.0364973	2.3235e-05	705.147
TA0772_MTF1_DBD_monomer	4.25808	9.50688e-06	0.773885	0.767964	0.0380047	0.0365315	2.35003e-05	705.142
SRBP1_HUMAN.H10MO.B	4.22874	1.09644e-05	0.904009	0.898633	0.0323285	0.0334154	7.18704e-06	706.733
AJ_MYBL1::FIGLA_002	4.228	1.10091e-05	0.804358	0.799186	0.0309512	0.0321605	6.51739e-06	706.858
TA0059_SP1_DBD_monomer	4.22704	1.11078e-05	0.944586	0.937894	0.0386751	0.0416273	3.23785e-06	707.727
AJ_GCM1::FIGLA_002	4.21961	1.14556e-05	0.814437	0.80841	0.0355264	0.0375491	4.85279e-06	707.271
IRF2_HUMAN.H10MO.C	4.20385	1.21507e-05	0.860491	0.854571	0.0379272	0.0370044	2.27571e-05	705.45
AJ_TEAD4::FIGLA_001	4.20078	1.22088e-05	0.837349	0.831543	0.0393104	0.0362929	5.64009e-05	704.353
HU0007_ZNF189	4.18643	1.31001e-05	0.918304	0.907836	0.0683198	0.0656875	3.12322e-05	705.147
AJ_MYBL1::EOMES_001	4.17417	1.36952e-05	0.763941	0.759175	0.0331025	0.0299768	8.31e-05	703.998
AJ_TEAD4::EOMES_002	4.1702	1.39554e-05	0.811458	0.806461	0.0344932	0.0314602	7.58504e-05	704.127
RFX4_HUMAN.H10MO.D	4.12674	1.62979e-05	0.805951	0.799431	0.0542687	0.0414016	0.000816479	701.38
BU0055 Rfx4_primary	4.09412	1.92211e-05	0.833154	0.826714	0.0488865	0.0412721	0.000280454	702.817
AJ_ERF::CLOCK	4.09524	1.96186e-05	0.788193	0.783422	0.0311802	0.0306098	3.20343e-05	705.58
ZN740_HUMAN.H10MO.D	4.0881	2.04343e-05	0.894878	0.886726	0.0496735	0.0524223	9.29215e-06	707.234
HU0024_ZNF574	4.0867	2.04537e-05	0.820108	0.81469	0.034347	0.0348397	1.91022e-05	706.298
TA0780_E2F1_DBD_dimer	4.06318	2.25175e-05	0.816422	0.809948	0.0429918	0.0418584	4.16666e-05	705.406
BU0052 Plagl1_primary	4.05862	2.31647e-05	0.839204	0.831794	0.0462396	0.0479921	1.44175e-05	706.831
RFX2_HUMAN.H10MO.C	4.0542	2.31797e-05	0.779632	0.7735	0.0434718	0.0397185	0.000112046	704.159
MA0522.1 Tcf3	4.04985	2.4011e-05	0.926567	0.920379	0.0392693	0.0401648	1.94023e-05	706.488
KLF1_HUMAN.H10MO.C	4.04101	2.51277e-05	0.903493	0.896683	0.0407543	0.0443111	6.59341e-06	707.989
MBD2_HUMAN.H10MO.B	4.02419	2.68588e-05	0.895649	0.886559	0.0571544	0.0593748	1.6543e-05	706.853
AJ_ETV2::NHLH1_001	4.00157	2.93602e-05	0.765648	0.760079	0.0372719	0.0365684	4.71873e-05	705.567
EGR1_HUMAN.H10MO.A	3.99632	3.04878e-05	0.876922	0.870173	0.0399215	0.044412	5.25402e-06	708.601
HU0038_ZNF621	3.96731	3.37933e-05	0.824531	0.819415	0.0357209	0.0338695	9.02832e-05	704.867
AJ_HOXB2::NHLH1_003	3.96122	3.48367e-05	0.814579	0.810413	0.0281856	0.0276313	5.60881e-05	705.55
AJ_GCM1::NHLH1_001	3.9619	3.50874e-05	0.803074	0.798028	0.031528	0.033485	1.48031e-05	707.391
NFIC_HUMAN.H10MO.A	3.95855	3.51809e-05	0.854379	0.849181	0.0355522	0.0344964	6.63031e-05	705.335
MYB_HUMAN.H10MO.C	3.95968	3.54902e-05	0.975648	0.972007	0.0223502	0.0241786	1.07086e-05	707.858
NDF1_HUMAN.H10MO.C	3.9554	3.58175e-05	0.903747	0.89891	0.0319828	0.0321331	3.90175e-05	706.083
BU0100 Zfp740_primary	3.95533	3.60931e-05	0.888481	0.880002	0.0527893	0.0563613	1.38865e-05	707.522
TA0338_Ascl2_DBD_dimer	3.95151	3.61917e-05	0.896972	0.890609	0.0440309	0.0422988	7.90828e-05	705.13
MA0816.1 Ascl2	3.94837	3.66722e-05	0.896897	0.890535	0.0440657	0.0423295	8.01058e-05	705.128
AJ_TFAP2C::HES7_002	3.94803	3.70351e-05	0.789294	0.782969	0.0411295	0.0421071	2.96087e-05	706.51
BU0044 Mtf1_primary	3.90975	4.30018e-05	0.8072	0.801236	0.042507	0.040068	0.000121323	704.751
TA0078_ZNF524_full_dimer	3.90011	4.49117e-05	0.796238	0.789765	0.0451882	0.0436064	8.99698e-05	705.221
MA0103.2 ZEB1	3.88833	4.74157e-05	0.928168	0.920616	0.0507871	0.0510389	5.1152e-05	706.089
TA0131_ETS1_full_dimer	3.88821	4.74953e-05	0.745958	0.740635	0.0354662	0.0359797	4.41308e-05	706.301
AJ_GCM1::FIGLA_004	3.88633	4.83017e-05	0.815363	0.809722	0.0347316	0.038169	1.13696e-05	708.271
AJ_TEAD4::CLOCK_002	3.86549	5.22236e-05	0.789118	0.7844	0.0313885	0.0320764	4.31935e-05	706.468
TA0081_ZNF740_full_monomer	3.85415	5.54122e-05	0.884858	0.876133	0.051734	0.0595485	5.54338e-06	709.565
AJ_ETV5::CLOCK	3.83337	5.98803e-05	0.808003	0.803474	0.0291332	0.0310656	2.47114e-05	707.491
TA0336_Tcfap2a_DBD_dimer	3.82957	6.07147e-05	0.85348	0.846375	0.0464644	0.048769	3.26988e-05	707.1
TF7L1_HUMAN.H10MO.D	3.82767	6.10842e-05	0.867289	0.863503	0.0251481	0.0260001	4.20747e-05	706.739
GCM2_HUMAN.H10MO.D	3.82472	6.1394e-05	0.845892	0.83984	0.042614	0.0415775	0.000102181	705.45
MA0116.1 Znf423	3.82438	6.18811e-05	0.869575	0.8642	0.0358801	0.0369364	4.56744e-05	706.638
ASCL2_HUMAN.H10MO.D	3.81257	6.49796e-05	0.920482	0.916097	0.0291972	0.0302349	4.37158e-05	706.777
ARNT_HUMAN.H10MO.B	3.7923	7.08576e-05	0.928734	0.920923	0.0503081	0.0541564	2.53253e-05	707.731
AJ_GCM1::FIGLA_007	3.78835	7.11731e-05	0.772861	0.767707	0.0367376	0.0357485	0.000121731	705.394
MA0105.2 NFKB1	3.78279	7.25498e-05	0.855463	0.848866	0.0483128	0.0458064	0.000177113	704.866
AJ_TFAP4::MAX_001	3.77732	7.44319e-05	0.790194	0.784595	0.0399879	0.0389402	0.000125566	705.41
RARA_HUMAN.H10MO.C	3.77464	7.50393e-05	0.824174	0.819713	0.0325624	0.0310429	0.0001695	704.975
AJ_MYBL1::FIGLA_005	3.75576	8.15346e-05	0.814907	0.810369	0.0314983	0.0317492	8.33129e-05	706.156
AJ_E2F1::HES7_002	3.71714	9.49497e-05	0.770758	0.765044	0.040877	0.0403946	0.000128449	705.721
SP1_HUMAN.H10MO.S	3.70741	0.000100422	0.910936	0.902886	0.0485869	0.0571243	7.88566e-06	710.199
MA0131.2 HINFP	3.70197	0.000101466	0.847767	0.841118	0.0452685	0.0472148	6.22325e-05	706.948
AJ_TFAP2C::ETV7	3.70167	0.000101601	0.787924	0.783355	0.0310649	0.0324421	6.11043e-05	706.979
MA0051.1 IRF2	3.69694	0.000102463	0.810971	0.805944	0.0374157	0.035721	0.000219607	705.004
TA0046_HINFP1_full_monomer	3.69412	0.000104678	0.847854	0.841222	0.0452386	0.0471907	6.41603e-05	706.951
MA0753.1 ZNF740	3.69273	0.000105996	0.897	0.888914	0.0513802	0.0575878	2.01759e-05	708.806
AJ_CUX1::NHLH1_001	3.68433	0.000107946	0.742302	0.73811	0.0307718	0.0298918	0.000183167	705.358
HIC1_HUMAN.H10MO.C	3.68215	0.000109269	0.906287	0.900414	0.0418534	0.0419187	0.000121783	706.014
TA0080_ZNF740_DBD_monomer	3.68216	0.000110514	0.896862	0.88879	0.0514505	0.0576544	2.12912e-05	708.801
AJ_ETV5::TCF3_002	3.67707	0.000112017	0.802586	0.797924	0.031837	0.0333272	6.53373e-05	707.036
AJ_GCM1::SPDEF_001	3.67634	0.000112033	0.837606	0.832535	0.0355353	0.0362534	9.58594e-05	706.429
MA0865.1 E2F8	3.67338	0.000113657	0.785081	0.779143	0.0406073	0.0424991	6.65631e-05	707.031
MA0872.1 TFAP2A.var.3	3.67138	0.000114506	0.843943	0.83693	0.0481795	0.0502081	7.15905e-05	706.927
TA0864_TFAP2A_DBD_dimer	3.66536	0.00011725	0.843916	0.836912	0.0482083	0.0502262	7.36549e-05	706.922
TA0785_E2F8_DBD_dimer	3.6612	0.000119235	0.78491	0.778986	0.0406467	0.0425369	7.01143e-05	707.029
TA0265_RFX2_DBD_dimer	3.6542	0.000119494	0.753786	0.748095	0.0477696	0.0408702	0.000897571	703.029
AJ_GCM2::EOMES	3.65418	0.000121653	0.816254	0.81208	0.0307183	0.0300106	0.000189683	705.477
AJ_E2F3::HES7	3.65204	0.000122662	0.776318	0.769173	0.0526675	0.0513996	0.000193856	705.455
MA0471.1 E2F6	3.63617	0.000130931	0.927739	0.92188	0.0422275	0.042342	0.000143032	706.039
AJ_ETV5::EOMES_001	3.62539	0.000137024	0.788524	0.784728	0.026581	0.0275232	9.49626e-05	706.775
AJ_TFAP2C::ONECUT2_004	3.61982	0.000139806	0.779344	0.775597	0.0266793	0.0272044	0.000120779	706.418
BU0075 Sp100_primary	3.61551	0.000140723	0.814121	0.80899	0.0399356	0.0372688	0.000385529	704.557
PROX1_HUMAN.H10MO.D	3.61557	0.000142632	0.870772	0.866145	0.0318824	0.0336445	7.48727e-05	707.232
MA0079.3 SP1	3.61531	0.000144216	0.938297	0.932034	0.0385514	0.0455768	1.14575e-05	710.369
AJ_TEAD4::TBX21_001	3.61183	0.000144347	0.847556	0.842841	0.033363	0.0343113	0.00011053	706.615
IRF4_HUMAN.H10MO.C	3.61201	0.000144762	0.880924	0.876701	0.0288352	0.0307386	6.52925e-05	707.483
NR1I3_HUMAN.H10MO.C	3.60553	0.000146247	0.846532	0.842809	0.029129	0.0271167	0.000410401	704.51
KLF15_HUMAN.H10MO.D	3.5911	0.000156884	0.903995	0.899171	0.0333304	0.0353153	7.81074e-05	707.332
MA0105.1 NFKB1	3.58234	0.000160637	0.890366	0.884585	0.0440324	0.0423942	0.000295779	705.175
PLAG1_HUMAN.H10MO.D	3.58172	0.000163129	0.875022	0.870252	0.0320542	0.0350182	5.11006e-05	708.114
TA0043_GLIS2_DBD_monomer	3.57241	0.000168617	0.819233	0.814119	0.035474	0.0376349	8.28715e-05	707.364
BU0003 Ascl2_primary	3.56282	0.000174131	0.852839	0.847631	0.0379475	0.0384139	0.000166475	706.252
MA0736.1 GLIS2	3.56283	0.000174931	0.819376	0.814277	0.0354873	0.0376278	8.69669e-05	707.35
MA0832.1 Tcf21	3.55346	0.000179438	0.80381	0.798061	0.0442912	0.042494	0.000341494	705.103
TA0381_Tcf21_DBD_dimer	3.54482	0.000185479	0.804016	0.798288	0.0442387	0.0424521	0.000351015	705.107
TA0224_NRF1_full_dimer	3.53918	0.000190076	0.801802	0.793361	0.0636014	0.0626649	0.000258538	705.657
ZIC1_HUMAN.H10MO.B	3.53822	0.000192662	0.95314	0.949677	0.0236275	0.0257333	6.48159e-05	708.033
AJ_ETV2::RFX5_004	3.52599	0.000199856	0.754312	0.750304	0.0303394	0.0298699	0.000273765	705.641
AJ_E2F3::FOXO6_001	3.51873	0.000206602	0.770711	0.766321	0.0315289	0.0327932	0.000136762	706.881
MA0461.1 Atoh1	3.48991	0.000230378	0.943511	0.936636	0.0498086	0.0517777	0.000154451	706.868
MA0598.1 EHF	3.48605	0.000233359	0.951868	0.944129	0.0571138	0.0583516	0.000197544	706.462
E2F3_HUMAN.H10MO.B	3.48377	0.000236463	0.892977	0.887345	0.0395912	0.0425072	0.000100941	707.664
AJ_RFX3::ETV7	3.46555	0.000251152	0.740254	0.73634	0.0300663	0.0296714	0.000330227	705.692
TA0771_Egr1_mouse	3.46521	0.000253989	0.850012	0.844299	0.0395071	0.0433507	7.95696e-05	708.23
TA0270_RFX5_DBD_dimer	3.45258	0.000255431	0.766989	0.76111	0.0574509	0.0446335	0.00362159	701.617
MA0510.2 RFX5	3.45258	0.000255431	0.766989	0.76111	0.0574509	0.0446335	0.00362159	701.617
NFIA_HUMAN.H10MO.C	3.45173	0.000261989	0.820942	0.816192	0.0398289	0.0361281	0.000892579	704.028
TA0298_TBX1_DBD_dimer	3.44325	0.000269363	0.706626	0.702563	0.035235	0.0309786	0.00125335	703.479
TA0208_MYBL1_DBD_dimer	3.43375	0.000279101	0.799832	0.7948	0.0437238	0.0384664	0.00128017	703.49
MA0776.1 MYBL1	3.43375	0.000279101	0.799832	0.7948	0.0437238	0.0384664	0.00128017	703.49
AJ_GCM1::MAX_006	3.42615	0.000291159	0.749165	0.744431	0.0364691	0.0363104	0.000341468	705.884
TA0267_RFX3_DBD_dimer	3.42321	0.000291199	0.762248	0.756849	0.0458493	0.0414046	0.0010186	703.947
BU0095 Zfp161_primary	3.42196	0.000296291	0.798944	0.791421	0.0568816	0.0577746	0.000271194	706.328
AJ_E2F1::EOMES_002	3.42055	0.000297618	0.773444	0.768408	0.0383991	0.0386926	0.000301002	706.149
AJ_MGA::PITX1	3.41735	0.00030198	0.835441	0.830932	0.0334491	0.0346853	0.00021188	706.809
HEN1_HUMAN.H10MO.C	3.40286	0.000317319	0.795205	0.79048	0.0366867	0.0364903	0.00037568	705.862
AJ_E2F1::EOMES_001	3.38459	0.000340554	0.766017	0.761614	0.0331257	0.0341889	0.000255081	706.698
AJ_ERF::SREBF2_001	3.36748	0.0003549	0.758394	0.754205	0.0384096	0.0326385	0.00212121	702.919
TA0067_ZBTB7A_DBD_monomer	3.36028	0.000369847	0.842988	0.837974	0.0405919	0.039198	0.000611449	705.236
GLIS3_HUMAN.H10MO.D	3.35394	0.000381269	0.913563	0.909151	0.0331533	0.0345768	0.000251226	706.947
MA0750.1 ZBTB7A	3.3495	0.000384668	0.842909	0.83791	0.040603	0.0392088	0.000633865	705.236
MA0499.1 Myod1	3.32541	0.000422	0.919711	0.914387	0.0412339	0.0420849	0.000364993	706.439
HES1_HUMAN.H10MO.D	3.32713	0.000422175	0.893873	0.890251	0.0259032	0.0286305	0.000129557	708.425
AJ_HOXB2::RFX5_003	3.3158	0.000434827	0.8008	0.796392	0.0359846	0.0349278	0.00067053	705.342
MA0159.1 RARA::RXRA	3.31294	0.00044153	0.838218	0.83445	0.0292045	0.0298942	0.000368971	706.506
MA0500.1 Myog	3.3024	0.000457633	0.930645	0.92499	0.044982	0.045002	0.000500897	705.989
MA0506.1 NRF1	3.28095	0.000496375	0.873464	0.866188	0.0553713	0.0582965	0.000295314	707.175
KAISO_HUMAN.H10MO.S	3.26586	0.000523766	0.893203	0.888573	0.0354154	0.0372692	0.000314638	707.164
GN_MYRF_TOP1000	3.24577	0.000560075	0.857826	0.852874	0.0400222	0.0400943	0.000601215	706.019
ETV3_HUMAN.H10MO.D	3.22496	0.000600618	0.887559	0.884576	0.0252067	0.0242975	0.000971731	705.199
MYOD1_HUMAN.H10MO.C	3.22574	0.00060248	0.94568	0.941393	0.0339508	0.0349385	0.00047639	706.63
SMAD1_HUMAN.H10MO.D	3.20766	0.000645742	0.907069	0.903534	0.0260875	0.0289843	0.000199335	708.565
TA0047_HINFP1_full_dimer	3.20225	0.000655747	0.696683	0.690594	0.0471739	0.0499868	0.000368698	707.334
AJ_MYBL1::FIGLA_001	3.19977	0.000658695	0.804158	0.80014	0.0327881	0.0330063	0.000668656	706.127
MA0024.3 E2F1	3.19007	0.000678165	0.805653	0.800816	0.0417024	0.0398373	0.00118875	705.016
AJ_ETV5::HES7_001	3.1917	0.00068074	0.820246	0.814962	0.0407629	0.0435311	0.000349555	707.528
AJ_ERF::DLX3_001	3.18628	0.000684208	0.837537	0.834242	0.0296877	0.0271512	0.00181676	704.178
TA0781_E2F1_DBD_dimer	3.18289	0.000695364	0.805604	0.800773	0.0417313	0.0398757	0.00121261	705.021
AJ_GCM1::PITX1_001	3.17633	0.000713222	0.799987	0.796334	0.0307526	0.0302222	0.000933556	705.603
AJ_TFAP2C::MAX_002	3.17556	0.00071802	0.77719	0.772497	0.0376967	0.0388428	0.000562676	706.66
MNT_HUMAN.H10MO.D	3.17173	0.000730019	0.918866	0.915704	0.0243837	0.0262138	0.000348339	707.697
NFKB1_HUMAN.H10MO.B	3.16047	0.00075533	0.872527	0.867588	0.040663	0.041075	0.000737807	706.204
AJ_E2F3::TBX21_003	3.15999	0.00075881	0.779201	0.774927	0.0339288	0.0355527	0.000492188	707.06
BU0009 E2F3_primary	3.14659	0.000794971	0.811108	0.804929	0.0490483	0.0516276	0.000491159	707.17
TA0855_RFX5_DBD_dimer	3.12387	0.00083199	0.768752	0.763354	0.0587322	0.045293	0.0079023	701.519
AJ_E2F1::ELK1_001	3.13271	0.000835542	0.774939	0.769795	0.0398858	0.0431815	0.00037239	707.877
MA0493.1 Klf1	3.12694	0.000852625	0.905727	0.901	0.0364592	0.0397507	0.000349954	708.061
AJ_GCM1::MAX_003	3.12215	0.000861753	0.746975	0.742681	0.0357639	0.0361482	0.00083604	706.218
BU0008 E2F2_primary	3.12076	0.000868481	0.807304	0.800957	0.0508971	0.0534663	0.000552578	707.121
IRF3_HUMAN.H10MO.C	3.11342	0.000884622	0.852124	0.848087	0.0351883	0.0340661	0.00132817	705.288
TA0271_RFX5_DBD_dimer	3.10369	0.000891598	0.768557	0.763191	0.0587745	0.0453183	0.0082538	701.517
MA0137.1 STAT1	3.10348	0.000900935	0.845699	0.841234	0.0453818	0.0377372	0.00492222	702.583
MA0521.1 Tcf12	3.10792	0.000903133	0.922844	0.917602	0.0447621	0.0443238	0.00108245	705.765
TA0773_PRDM4_full_monomer	3.10827	0.000906104	0.767569	0.76258	0.0402903	0.0421965	0.000598165	707.047
TA0086_Zfp740_DBD_monomer	3.09625	0.000946768	0.910448	0.904741	0.0443601	0.0484726	0.000384229	708.119
TA0366_NHLH1_DBD_dimer	3.08986	0.000959901	0.877191	0.871908	0.0456136	0.0449247	0.00121099	705.649
AJ_ETV2::TBX21_001	3.07387	0.00102294	0.752668	0.749425	0.0247694	0.0277481	0.000310834	708.793
MA0608.1 Creb3l2	3.06455	0.00104278	0.882237	0.877153	0.0456967	0.0435866	0.00177645	704.985
MA0048.1 NHLH1	3.06007	0.00106155	0.86787	0.863088	0.0416769	0.0410582	0.00132947	705.655
MA0048.2 NHLH1	3.05793	0.00106617	0.879394	0.874275	0.046166	0.0439748	0.00183483	704.958
MA0735.1 GLIS1	3.04525	0.0011222	0.739605	0.73513	0.0363246	0.0386324	0.000635177	707.425
AJ_GCM2::PITX1_002	3.03538	0.00114871	0.827259	0.823524	0.0343307	0.0323241	0.00217642	704.729
TA0042_GLIS1_DBD_monomer	3.03583	0.00115804	0.740056	0.7356	0.0363112	0.0385883	0.000663059	707.406
AJ_ETV2::RFX5_001	3.03282	0.00116933	0.778787	0.77484	0.0323557	0.0342123	0.000707961	707.281
TA0309_TBX21_full_dimer	3.02233	0.00120394	0.723201	0.719195	0.0355328	0.0348299	0.00157218	705.548
TA0367_NHLH1_full_dimer	3.0175	0.00122037	0.879523	0.874475	0.0462092	0.0439488	0.00209971	704.928
TA0273_Rfx2_DBD_dimer	3.00736	0.00126282	0.765673	0.761012	0.0425412	0.0407071	0.00205072	705.05
AJ_E2F3::TBX21_001	2.98241	0.00137658	0.808853	0.80499	0.0339116	0.0340389	0.00142746	706.062
AJ_TEAD4::EOMES_005	2.98091	0.00138267	0.896402	0.893105	0.0291516	0.0290591	0.00153164	705.91
TA0635_NKX3-2_DBD_monomer	2.97982	0.00139007	0.910441	0.905869	0.0395144	0.0403307	0.00122495	706.44
MA0122.2 NKX3-2	2.97277	0.00142261	0.91043	0.90587	0.0395181	0.0403183	0.00125906	706.43
AJ_TFAP2C::ONECUT2_002	2.96241	0.00145891	0.771968	0.768552	0.0330514	0.0302775	0.00336949	704.208
MA0154.2 EBF1	2.95749	0.00148573	0.914034	0.909763	0.0404193	0.0379287	0.00280739	704.663
BHE40_HUMAN.H10MO.A	2.95179	0.00151874	0.879429	0.874729	0.0427952	0.0418357	0.00200648	705.491
NKX32_HUMAN.H10MO.C	2.9415	0.0015799	0.908039	0.904596	0.0289813	0.0307742	0.0009393	707.386
MA0524.1 TFAP2C	2.94006	0.0015867	0.884036	0.879796	0.0359184	0.0379099	0.0010045	707.236
TA0342_BHLHB3_full_dimer	2.93695	0.00159963	0.862786	0.857259	0.0482203	0.0494628	0.00134646	706.555
TA0868_ESRRA_DBD_dimer	2.93105	0.00162727	0.798118	0.794907	0.0288646	0.0287898	0.00178559	705.922
BU0036 Irf6_primary	2.93081	0.00162741	0.824227	0.820517	0.0336511	0.0332627	0.00193898	705.726
TA0048_HINFP1_full_dimer	2.92877	0.00163369	0.706015	0.700305	0.0536863	0.0512215	0.00265452	704.991
TA0164_GCM2_DBD_monomer	2.92747	0.00164181	0.879724	0.875926	0.0353786	0.0340768	0.00245797	705.183
MA0737.1 GLIS3	2.92934	0.00164403	0.781665	0.777657	0.0336943	0.0359674	0.000929185	707.518
MA0767.1 GCM2	2.9261	0.00164916	0.879803	0.87601	0.0353439	0.0340525	0.00246235	705.189
BU0024 Gcm1_primary	2.92394	0.00166236	0.850641	0.846957	0.0339328	0.0330973	0.00222848	705.443
TA0044_GLIS3_DBD_monomer	2.92517	0.00166639	0.781608	0.777602	0.0337215	0.0360055	0.000940691	707.524
BU0092 Zbtb7b_primary	2.92372	0.00166973	0.837758	0.83346	0.0376609	0.038638	0.00140475	706.559
PAX5_HUMAN.H10MO.A	2.92036	0.00168469	0.819415	0.81629	0.0281559	0.0281187	0.00182564	705.95
ZEP2_HUMAN.H10MO.D	2.89482	0.00182315	0.903138	0.900578	0.024285	0.0232243	0.00287385	705.038
AJ_CLOCK::EVX1_001	2.8919	0.00184751	0.812099	0.80876	0.0301339	0.0303503	0.00185029	706.138
MA0065.2 Pparg::Rxra	2.88787	0.00187034	0.852635	0.84915	0.0317532	0.0317116	0.00202215	705.951
AP2C_HUMAN.H10MO.A	2.86614	0.00201337	0.881164	0.876831	0.0373038	0.0397529	0.00118195	707.475
MTF1_HUMAN.H10MO.C	2.85287	0.00208653	0.796943	0.793101	0.0364736	0.035384	0.00288567	705.331
MA0101.1 REL	2.852	0.00209695	0.914391	0.91066	0.034383	0.0343822	0.00223617	705.979
AJ_GCM1::ELK1_001	2.84387	0.00215974	0.768502	0.765396	0.0271282	0.028721	0.00136079	707.312
AJ_ELK1::EOMES_001	2.84156	0.00218179	0.766022	0.762738	0.0273546	0.0303876	0.000846622	708.561
AJ_GCM1::HOXA2	2.81435	0.00235604	0.831824	0.828556	0.0314342	0.0305028	0.00322394	705.336
BU0007 Bhlhb2_primary	2.80857	0.00240104	0.796241	0.792474	0.0359091	0.0352429	0.00298966	705.574
RREB1_HUMAN.H10MO.D	2.80695	0.00241937	0.858655	0.854971	0.033877	0.0344947	0.00219901	706.385
AJ_E2F3::EOMES	2.80428	0.00242669	0.75082	0.747387	0.0340268	0.0321565	0.00408494	704.802
HU0036_ZIC2	2.80706	0.00243298	0.921091	0.917595	0.0291182	0.0327572	0.000844879	708.909
TA0290_TBR1_DBD_monomer	2.79629	0.00249955	0.865311	0.860916	0.0409526	0.0412969	0.00247282	706.166
MA0802.1 TBR1	2.79629	0.00249955	0.865311	0.860916	0.0409526	0.0412969	0.00247282	706.166
AJ_ETV2::SREBF2_002	2.78355	0.00260505	0.792513	0.789092	0.0311893	0.0322996	0.00204168	706.778
TA0332_TFAP2C_full_dimer	2.76519	0.00277002	0.829767	0.823827	0.0503714	0.0564956	0.0010201	708.825
AJ_ERF::EOMES_002	2.7569	0.00281294	0.850029	0.846715	0.0331509	0.0315787	0.004386	704.959
AJ_MYBL1::MAX_003	2.74854	0.00288503	0.77448	0.771233	0.0327586	0.0310261	0.00468527	704.845
MA0119.1 NFIC::TLX1	2.74659	0.00289586	0.791087	0.786574	0.0469459	0.0431526	0.00584449	704.271
BU0047 Myf6_primary	2.74075	0.00296278	0.849664	0.845991	0.0358091	0.0352134	0.00359399	705.616
AJ_ETV2::SREBF2_001	2.74084	0.00296433	0.804011	0.800794	0.030985	0.0308446	0.00325923	705.88
AJ_ETV2::HES7_003	2.74011	0.00298114	0.768035	0.763962	0.0371709	0.0390775	0.0020588	707.14
TA0668_RHOXF1_full_dimer	2.72348	0.00313405	0.894373	0.890908	0.0322272	0.0334429	0.00243374	706.827
TA0852_Bhlhb2_DBD_monomer	2.72312	0.00313587	0.868832	0.863779	0.0474004	0.0487697	0.00262051	706.626
AJ_HOXB2::ESRRB_001	2.71383	0.00319927	0.778883	0.775123	0.0398842	0.0363786	0.00670648	704.128
AP2A_HUMAN.H10MO.C	2.68664	0.00350778	0.872905	0.869433	0.0321677	0.0339726	0.00235696	707.251
AJ_ALX4::EOMES	2.67371	0.00362404	0.772752	0.7697	0.0314066	0.0299758	0.00543289	704.998
AJ_E2F1::HES7_001	2.66984	0.00368704	0.759365	0.754533	0.0455795	0.0475748	0.0027493	706.966
BU0099 Zfp691_primary	2.66347	0.00373013	0.827943	0.823891	0.0429839	0.0399556	0.00671042	704.482
MA0154.3 EBF1	2.66351	0.00374317	0.825392	0.821104	0.0431523	0.0422942	0.0046049	705.545
TA0109_EBF1_full_dimer	2.65748	0.00381131	0.82534	0.821063	0.0431458	0.0422903	0.00468228	705.547
BU0054 Rfx3_primary	2.64859	0.00388579	0.795959	0.792384	0.0400108	0.0354309	0.00952674	703.602
BU0034 Irf4_primary	2.64973	0.00389699	0.820156	0.81669	0.0355648	0.0343689	0.00530694	705.251
TA0634_NKX3-1_full_monomer	2.65016	0.00390234	0.903045	0.899212	0.037727	0.0380182	0.00387648	706.15
MA0145.2 Tcfcp2l1	2.64476	0.00397677	0.875509	0.872181	0.0312698	0.0330851	0.0026586	707.297
AJ_HOXB2::NHLH1_001	2.64206	0.00400264	0.797841	0.794975	0.0276793	0.0285056	0.00334739	706.648
MA0154.1 EBF1	2.6374	0.00406241	0.922459	0.918974	0.0331694	0.0347414	0.00296137	707.049
TA0641_Nkx3-1_DBD_monomer	2.63641	0.00406557	0.899693	0.895581	0.0406137	0.0409878	0.00399196	706.183
USF2_HUMAN.H10MO.A	2.62984	0.00410896	0.802419	0.798119	0.0484529	0.0429285	0.00992651	703.611
MA0145.1 Tcfcp2l1	2.63046	0.00414898	0.875766	0.872459	0.0312501	0.0330526	0.0027923	707.288
TA0783_E2F4_DBD_dimer	2.62478	0.00419768	0.770913	0.766801	0.0424566	0.0411567	0.00555961	705.315
MA0124.2 Nkx3-1	2.62536	0.00420077	0.899872	0.895786	0.0405386	0.0409	0.00413394	706.177
AJ_HOXB2::ELF1_001	2.61896	0.00423988	0.798584	0.795452	0.0358278	0.0313857	0.0108973	703.418
AJ_ETV2::PITX1	2.61831	0.00427269	0.794463	0.791259	0.0338811	0.0321447	0.0065717	704.879
MA0009.1 T	2.60901	0.00438904	0.817658	0.813432	0.0452095	0.0425396	0.0071198	704.717
AJ_RFX3::FIGLA_002	2.60279	0.0044683	0.805476	0.802339	0.0338509	0.0316556	0.00753735	704.597
YBOX1_HUMAN.H10MO.D	2.60057	0.00453383	0.919478	0.916805	0.0252545	0.0270239	0.00279168	707.579
TA0274_Rfx3_DBD_dimer	2.5861	0.00463877	0.757221	0.752809	0.0554144	0.0447375	0.0182634	702.146
NRF1_HUMAN.H10MO.A	2.5922	0.00465145	0.792108	0.785922	0.0573826	0.0627488	0.00238859	708.139
MA0074.1 RXRA::VDR	2.57468	0.00484191	0.807856	0.804421	0.0385583	0.0350338	0.00970704	704.058
AJ_TFAP4::FLI1_002	2.55944	0.0050938	0.838573	0.835116	0.0353356	0.0354988	0.00517104	706.081
AJ_ETV2::FIGLA_002	2.55608	0.00514956	0.806715	0.803128	0.0359594	0.0368835	0.0044814	706.553
ZBT7A_HUMAN.H10MO.D	2.5551	0.00516282	0.886961	0.884673	0.0230468	0.023531	0.00465067	706.447
ZSCA4_HUMAN.H10MO.D	2.54272	0.00534354	0.818493	0.813964	0.0469408	0.0468026	0.00572403	705.915
BU0027 Gmeb1_primary	2.54141	0.00538006	0.846604	0.843001	0.0353568	0.0372653	0.00380719	707.202
AJ_TFAP4::MAX_003	2.53549	0.00546928	0.805276	0.801913	0.0334429	0.0348665	0.00421575	706.938
ITF2_HUMAN.H10MO.B	2.53089	0.00552675	0.929481	0.924689	0.0501822	0.0497507	0.00615707	705.791
IRF8_HUMAN.H10MO.D	2.51838	0.00572987	0.876919	0.873908	0.0315618	0.0314191	0.00619678	705.88
GLI1_HUMAN.H10MO.C	2.50891	0.00587318	0.879655	0.876174	0.0380999	0.036447	0.00828783	705.044
AJ_ETV2::DLX3_003	2.50401	0.00594005	0.816371	0.81342	0.0337419	0.0309513	0.0108692	704.233
TA0068_ZBTB7B_full_monomer	2.50571	0.00595527	0.839009	0.83534	0.0369447	0.0384844	0.0046434	706.918
AJ_GCM1::ELF1_001	2.50224	0.00603637	0.835011	0.831604	0.0318362	0.0358047	0.00255362	708.902
MA0694.1 ZBTB7B	2.50075	0.00604009	0.839041	0.835378	0.0369546	0.0385027	0.00470604	706.923
MA0056.1 MZF1	2.49345	0.00620879	0.996045	0.994603	0.0124836	0.0152153	0.00126927	711.341
TA0461_FOXO3_full_multimer	2.49022	0.00621809	0.852108	0.848172	0.0405057	0.0415462	0.00544163	706.553
TLX1_HUMAN.H10MO.D	2.48873	0.00626059	0.856691	0.854221	0.0241447	0.0260863	0.00370483	707.824
AJ_ELK1::ETV7	2.48775	0.00628066	0.747351	0.744138	0.0311541	0.0339605	0.00346434	708.056
MA0107.1 RELA	2.46783	0.00660731	0.87789	0.873935	0.0430091	0.0421117	0.00794801	705.524
AJ_RFX3::HES7	2.46863	0.00661572	0.765095	0.761903	0.0324715	0.0339873	0.00501125	707.033
TA0346_Bhlhb2_DBD_dimer	2.46017	0.00676861	0.85747	0.852877	0.0477557	0.0490757	0.00585917	706.597
MA0615.1 Gmeb1	2.44008	0.00716794	0.849919	0.846543	0.0345609	0.036371	0.00524888	707.165
EHF_HUMAN.H10MO.C	2.43803	0.00718014	0.902062	0.898957	0.0343428	0.0334505	0.00889175	705.414
TA0312_TBX4_DBD_monomer	2.42906	0.00738572	0.920476	0.916892	0.0374207	0.0387882	0.00603794	706.8
MA0806.1 TBX4	2.42906	0.00738572	0.920476	0.916892	0.0374207	0.0387882	0.00603794	706.8
BU0025 Glis2_primary	2.42091	0.00753859	0.840186	0.837091	0.0337756	0.0335851	0.00815967	705.855
AJ_FOXO1::SPDEF	2.41931	0.00757348	0.871288	0.868657	0.0286342	0.0285795	0.00799929	705.937
AJ_ERF::TBX21_001	2.40529	0.00789176	0.72897	0.726433	0.0264606	0.0277364	0.00598746	707.068
MA0914.1 ISL2	2.39456	0.00810487	0.929545	0.926245	0.0365946	0.0362069	0.00903811	705.747
MA0464.2 BHLHE40	2.39464	0.00811073	0.863224	0.858821	0.0479351	0.0483168	0.00802886	706.156
TA0352_HEY2_DBD_dimer	2.3956	0.0081272	0.862933	0.858805	0.0405991	0.0453264	0.00388049	708.698
AJ_TEAD4::FIGLA_002	2.39197	0.00816745	0.792731	0.790009	0.0298878	0.029907	0.00847484	705.994
TA0595_ISL2_DBD_monomer	2.38839	0.00824315	0.929591	0.926302	0.0365699	0.036183	0.0091862	705.747
KAISO_HUMAN.H10MO.A	2.38854	0.00829252	0.791048	0.787646	0.0329119	0.0374649	0.00341051	709.244
AJ_ETV5::FIGLA	2.37176	0.00862584	0.819893	0.816383	0.039363	0.0388806	0.00969953	705.711
AJ_ETV2::EOMES_001	2.37	0.00871608	0.751044	0.748321	0.0270548	0.030219	0.00420467	708.711
TA0341_BHLHB2_DBD_dimer	2.36612	0.00876811	0.86346	0.859118	0.0478693	0.0482309	0.00870127	706.147
ZIC2_HUMAN.H10MO.C	2.36578	0.0088073	0.915247	0.912116	0.031956	0.0347969	0.0051472	708.028
AJ_TEAD4::HES7_004	2.35867	0.00892373	0.798943	0.796132	0.0326901	0.0313014	0.0120627	705.063
TA0151_SPDEF_full_monomer	2.35537	0.00901945	0.757609	0.754284	0.0375034	0.0370966	0.010038	705.742
THA_HUMAN.H10MO.S	2.34444	0.00930357	0.917684	0.914511	0.0349047	0.035567	0.00859582	706.402
HIC2_HUMAN.H10MO.D	2.3448	0.00931702	0.926927	0.923222	0.0386491	0.0415486	0.00601329	707.696
TA0269_RFX4_DBD_dimer	2.34283	0.00932497	0.788309	0.784895	0.0391593	0.0382836	0.0111215	705.492
TA0051_KLF13_full_monomer	2.3348	0.00950663	0.773229	0.769849	0.040651	0.0380261	0.0145603	704.603
ETS0026 h-SPIC	2.33335	0.00958711	0.94608	0.94361	0.0272352	0.0278254	0.0087152	706.462
MA0657.1 KLF13	2.31988	0.00989543	0.773211	0.769851	0.0406656	0.0380295	0.0151029	704.597
AJ_ETV2::FOXI1_003	2.31767	0.00996358	0.799533	0.796849	0.0319631	0.0304169	0.0138085	704.939
ZIC3_HUMAN.H10MO.C	2.29917	0.0105051	0.93426	0.931815	0.0273243	0.0279473	0.00950441	706.488
USF1_HUMAN.H10MO.A	2.2959	0.0105126	0.85793	0.853775	0.0539713	0.0474931	0.0216533	703.494
HIF1A_HUMAN.H10MO.A	2.29454	0.0106457	0.861626	0.857454	0.0456711	0.0477871	0.00834535	707.025
ZBTB4_HUMAN.H10MO.S	2.29117	0.010706	0.863315	0.860762	0.0300397	0.0292783	0.012898	705.428
ZN423_HUMAN.H10MO.D	2.2926	0.0107299	0.739382	0.735639	0.0383752	0.0429396	0.00532528	708.76
BU0035 Irf5_primary	2.28621	0.0108757	0.829624	0.826488	0.0350322	0.0360585	0.00947002	706.635
E2F8_HUMAN.H10MO.D	2.28159	0.0109959	0.888157	0.885717	0.0280405	0.0281016	0.0112607	706.027
TA0045_HIC2_DBD_monomer	2.27761	0.0111257	0.946977	0.944481	0.0279854	0.0288099	0.00968624	706.639
MA0738.1 HIC2	2.26974	0.0113587	0.946981	0.944493	0.0279931	0.0288135	0.00990578	706.635
ZN639_HUMAN.H10MO.D	2.26612	0.011503	0.806476	0.802825	0.0381357	0.0423709	0.0060852	708.566
AJ_TFAP2C::MAX_004	2.2575	0.0117519	0.764254	0.76089	0.0363745	0.0391821	0.00769594	707.748
TA0472_Foxg1_DBD_multimer	2.25475	0.0117527	0.824583	0.821391	0.0402541	0.0371749	0.0187204	704.359
MA0259.1 ARNT::HIF1A	2.24873	0.0120508	0.934904	0.930959	0.0404151	0.0461488	0.00530048	709.333
AJ_ETV5::CEBPD	2.24057	0.0120895	0.789916	0.787359	0.0373732	0.0299241	0.0361115	702.029
TA0207_MYBL1_DBD_dimer	2.22496	0.0127418	0.833994	0.831231	0.0331697	0.0326259	0.01446	705.621
AJ_HOXB2::ETV7_001	2.2232	0.0127448	0.80766	0.805037	0.0343053	0.0309691	0.0223944	703.941
AJ_ERF::ETV7	2.22503	0.0127755	0.801052	0.797849	0.0360645	0.0378414	0.00996644	707.093
AJ_TEAD4::ESRRB_001	2.2162	0.0130786	0.812409	0.809732	0.0298131	0.0317532	0.00932021	707.461
RHXF1_HUMAN.H10MO.D	2.21322	0.0131135	0.912494	0.909986	0.0313249	0.0297695	0.0178227	704.912
AJ_HES1	2.21394	0.0131817	0.854156	0.849392	0.0503132	0.0565942	0.00657931	708.906
GLIS1_HUMAN.H10MO.D	2.19145	0.0139041	0.795287	0.791701	0.0428308	0.0430034	0.0140603	706.068
AJ_TEAD4::HES7_001	2.17276	0.0146215	0.796407	0.793886	0.0284619	0.0304983	0.0101579	707.614
RFX5_HUMAN.H10MO.A	2.17228	0.0146731	0.814552	0.812146	0.0254718	0.0291411	0.00668601	709.388
PPARD_HUMAN.H10MO.D	2.16995	0.0146874	0.862112	0.859447	0.0321794	0.0322732	0.0149366	706.044
MYCN_HUMAN.H10MO.B	2.16126	0.0150215	0.922403	0.918804	0.0431785	0.0437656	0.0144185	706.281
AJ_ETV5::DLX2	2.14642	0.015502	0.810514	0.807951	0.0351633	0.0313372	0.0278633	703.713
AJ_FLI1::DLX2_002	2.14701	0.0155304	0.843033	0.840809	0.028553	0.0272073	0.0204963	704.965
AJ_CUX1::NHLH1_002	2.14437	0.0156735	0.740372	0.737802	0.0312022	0.0314923	0.0153995	706.185
AJ_ERF::HES7_002	2.1409	0.0157306	0.766511	0.763791	0.0369156	0.0333575	0.0265339	703.959
AJ_TEAD4::ELK1_002	2.13973	0.0157308	0.815989	0.813191	0.040084	0.0343084	0.0333939	703.035
TF65_HUMAN.H10MO.A	2.14239	0.015751	0.877589	0.874225	0.0409603	0.0412748	0.0156095	706.149
TA0082_ZNF75A_DBD_monomer	2.14062	0.0158202	0.829366	0.82614	0.0393794	0.0396077	0.015835	706.108
TA0305_TBX21_DBD_monomer	2.13897	0.0158776	0.872425	0.869064	0.0415536	0.0412909	0.016939	705.841
AJ_GCM2::SOX15_002	2.13728	0.0159567	0.78606	0.783681	0.0289264	0.0292462	0.0155331	706.224
MA0607.1 Bhlha15	2.13652	0.0160363	0.930337	0.926881	0.0387989	0.0425394	0.00980316	708.209
ETS0025 h-SPIB	2.12702	0.0163814	0.948332	0.946098	0.0269503	0.0276016	0.0148827	706.519
AJ_ELK1::TBX21_001	2.12462	0.0164819	0.720396	0.718079	0.0279068	0.028663	0.0147459	706.585
MA0149.1 EWSR1-FLI1	2.11844	0.0167378	0.747704	0.743061	0.0561161	0.0576046	0.0150279	706.572
AJ_ELK1::SREBF2_001	2.11291	0.0169301	0.775677	0.772736	0.0377161	0.0365649	0.0203959	705.317
MA0479.1 FOXH1	2.10828	0.0170676	0.891636	0.888299	0.0461197	0.0415477	0.0287636	703.904
AJ_FLI1::FOXI1_003	2.10674	0.0172377	0.848126	0.845131	0.036111	0.0373638	0.0148432	706.758
TA0666_RHOXF1_DBD_dimer	2.09714	0.0176406	0.883837	0.880789	0.0375806	0.0381968	0.0167174	706.344
AJ_ETV2::TBX21_002	2.09485	0.0177099	0.862785	0.860084	0.034803	0.0338867	0.0208338	705.407
AJ_FLI1::ONECUT2	2.08428	0.0181582	0.786057	0.783797	0.0300235	0.028486	0.0240929	704.88
AJ_TEAD4::RFX5_001	2.08464	0.018216	0.769359	0.766955	0.0288803	0.0303166	0.0145471	707.103
NR1I2_HUMAN.H10MO.C	2.07809	0.0184294	0.850893	0.84873	0.029087	0.0273374	0.0254899	704.694
MA0104.1 Mycn	2.0782	0.0184591	0.935247	0.931768	0.0448034	0.0439868	0.0208157	705.581
TA0285_EOMES_DBD_monomer	2.07773	0.0184682	0.845329	0.842257	0.0401897	0.0388379	0.0224633	705.251
MA0800.1 EOMES	2.07773	0.0184682	0.845329	0.842257	0.0401897	0.0388379	0.0224633	705.251
MA0665.1 MSC	2.07709	0.0184928	0.868332	0.865251	0.0405635	0.0389681	0.0231237	705.13
TA0846_MSC_full_dimer	2.07566	0.0185578	0.868364	0.865286	0.0405566	0.0389493	0.0232324	705.123
AJ_ELK1::SPDEF	2.07261	0.0187655	0.768547	0.765819	0.0328316	0.0346035	0.0146941	707.202
AJ_CLOCK::NHLH1_001	2.07188	0.0187782	0.773814	0.771174	0.0327606	0.033493	0.0172844	706.478
MA0474.1 Erg	2.06779	0.0189581	0.91681	0.914161	0.0333521	0.0336652	0.0186278	706.187
NFYC_HUMAN.H10MO.B	2.06683	0.0189979	0.847691	0.844545	0.0398928	0.0400012	0.0192971	706.039
GLI3_HUMAN.H10MO.B	2.06421	0.0190875	0.883295	0.880236	0.0404704	0.0389242	0.0236791	705.154
AJ_GLI3	2.06273	0.0191848	0.781207	0.778139	0.0392266	0.039091	0.020089	705.903
HU0030_ZNF33A	2.0589	0.0193234	0.741063	0.738585	0.0334282	0.0316206	0.0258305	704.82
AJ_ETV2::DLX2_002	2.0562	0.0194024	0.810426	0.807983	0.0348251	0.0312042	0.0326855	703.808
BU0060 Smad3_primary	2.05263	0.0196741	0.862041	0.859214	0.0358355	0.0361989	0.0192618	706.204
GMEB2_HUMAN.H10MO.D	2.04876	0.0199205	0.873633	0.870275	0.0391189	0.0430896	0.0122729	708.332
AJ_TFAP4::ETV1	2.04498	0.020054	0.824358	0.821508	0.0357702	0.0366376	0.0183175	706.521
AJ_MYBL1::MAX_001	2.04017	0.0200913	0.788384	0.785736	0.0411611	0.0340406	0.0455098	702.5
TA0264_RFX2_DBD_dimer	2.03644	0.0202672	0.771753	0.768322	0.0537555	0.0441868	0.0467784	702.409
MA0600.2 RFX2	2.03644	0.0202672	0.771753	0.768322	0.0537555	0.0441868	0.0467784	702.409
AJ_TFAP2C::DLX3_001	2.0403	0.0202716	0.802339	0.800117	0.0283661	0.0286208	0.0199624	706.178
AJ_TFAP4::ETV4	2.0313	0.0207418	0.846655	0.844001	0.033	0.0343466	0.017481	706.898
AJ_TEAD4::RFX5_002	2.02967	0.0207652	0.776002	0.773775	0.029811	0.0288238	0.0249911	705.262
TA0300_TBX20_DBD_dimer	2.02599	0.0209471	0.776265	0.77362	0.0356239	0.0343006	0.0256739	705.176
TA0089_GRHL1_DBD_monomer	2.02656	0.0209909	0.758253	0.755669	0.0317476	0.0335237	0.0164248	707.248
AJ_ARNTL::PITX1_002	2.02048	0.0212711	0.779048	0.776374	0.0342548	0.0347726	0.02034	706.315
MA0160.1 NR4A2	2.01933	0.0212773	0.945713	0.943468	0.030633	0.0292017	0.0272268	704.974
TA0085_Zfp652_DBD_monomer	2.01516	0.0215524	0.815834	0.812321	0.0446837	0.045811	0.0196341	706.543
TA0867_ESRRA_DBD_dimer	2.00535	0.0220708	0.782376	0.779856	0.0320031	0.0330271	0.0194783	706.696
MA0527.1 ZBTB33	1.99473	0.0227349	0.80136	0.797925	0.0381088	0.0453038	0.00915314	710.542
FOXH1_HUMAN.H10MO.A	1.97706	0.0234514	0.879722	0.876745	0.0451384	0.0395277	0.0415946	703.412
TA0692_ESRRA_DBD_dimer	1.97269	0.0238673	0.771881	0.769512	0.0300819	0.0315623	0.0194916	707.091
ETV4_HUMAN.H10MO.B	1.96714	0.0241903	0.964493	0.962653	0.0231912	0.0245885	0.0187707	707.348
TA0057_SCRT2_DBD_monomer	1.96086	0.0245077	0.817169	0.814099	0.0408655	0.0411506	0.0243666	706.134
MA0517.1 STAT1::STAT2	1.95496	0.0246785	0.846354	0.843595	0.043404	0.0370247	0.0475006	702.981
MLX_HUMAN.H10MO.D	1.9506	0.0250237	0.832534	0.82863	0.0568658	0.0525618	0.0357359	704.375
TA0311_TBX2_full_monomer	1.9382	0.0257126	0.876363	0.873693	0.0408794	0.0361603	0.0431394	703.584
MA0688.1 TBX2	1.9382	0.0257126	0.876363	0.873693	0.0408794	0.0361603	0.0431394	703.584
MA0744.1 SCRT2	1.93849	0.025827	0.816873	0.813833	0.0409538	0.0412159	0.0257438	706.121
ZN350_HUMAN.H10MO.C	1.92443	0.0267022	0.830725	0.828899	0.024358	0.0249397	0.0246339	706.512
TFEB_HUMAN.H10MO.C	1.92189	0.026755	0.848912	0.844663	0.0630365	0.0580543	0.0383905	704.307
IKZF1_HUMAN.H10MO.C	1.92307	0.0268918	0.979318	0.977866	0.0169601	0.0198698	0.0124622	710.092
RFX3_HUMAN.H10MO.B	1.91282	0.0271416	0.82372	0.82068	0.0521608	0.0416649	0.0628068	701.995
AJ_FOXO1::ETV7	1.91494	0.0272828	0.788441	0.786227	0.0301156	0.030394	0.0268572	706.184
MA0486.1 HSF1	1.90316	0.028024	0.839775	0.83669	0.0426663	0.042589	0.0289356	705.939
STAT6_HUMAN.H10MO.C	1.8913	0.0287923	0.870753	0.86793	0.0395417	0.0392247	0.0305082	705.803
TA0345_BHLHE41_full_dimer	1.89015	0.028842	0.824165	0.820664	0.0503525	0.0486649	0.0340029	705.253
MA0636.1 BHLHE41	1.88991	0.0288581	0.824363	0.820867	0.0502863	0.0486005	0.0340219	705.253
TA0375_TCF4_DBD_dimer	1.89035	0.0288896	0.94555	0.942721	0.0382393	0.0393279	0.0261873	706.616
MA0830.1 TCF4	1.89015	0.0289026	0.945458	0.942625	0.038308	0.0393996	0.0261967	706.617
MA0595.1 SREBF1	1.88873	0.0289795	0.899431	0.896655	0.0382563	0.0386247	0.0284868	706.193
AJ_PITX1::HES7_002	1.88409	0.0292935	0.825034	0.822993	0.0280711	0.0284742	0.0282228	706.298
HU0004_ZNF250	1.87938	0.029636	0.876907	0.874376	0.033937	0.0353884	0.0252835	706.943
AJ_ARNTL::BHLHA15	1.86949	0.0302843	0.752338	0.749958	0.0330043	0.0334608	0.0292539	706.286
TA0145_FLI1_full_monomer	1.85516	0.03127	0.757061	0.754373	0.038078	0.0380743	0.0320074	705.977
AJ_GCM1::PITX1_003	1.84769	0.0317803	0.795005	0.792791	0.0321584	0.0314917	0.0353628	705.527
AJ_ELK1::FOXI1_001	1.84394	0.0320465	0.790996	0.788774	0.0324226	0.0316624	0.0360354	705.469
TA0337_ARNTL_DBD_dimer	1.84213	0.0321541	0.788057	0.784467	0.0535315	0.0511918	0.0391798	705.037
AJ_RFX3::FIGLA_001	1.84035	0.0323526	0.758511	0.756287	0.0311396	0.031765	0.0304839	706.427
AJ_ELK1::TBX21_004	1.83968	0.0323756	0.868072	0.865788	0.0327663	0.0326136	0.0337431	705.877
TA0299_TBX1_DBD_dimer	1.83744	0.0325883	0.718399	0.71609	0.0315932	0.0330289	0.0276549	707.004
TA0221_NFIA_full_dimer	1.83178	0.0329362	0.781189	0.778148	0.0445838	0.0436177	0.0367247	705.507
AJ_ETV2::HES7_002	1.82142	0.0338242	0.757403	0.754772	0.0345412	0.0379824	0.0229463	708.287
MA0004.1 Arnt	1.81709	0.0340745	0.91594	0.911215	0.0673431	0.0683525	0.0328082	706.312
AJ_TFAP4::DLX3_002	1.81296	0.0343145	0.765131	0.762768	0.036071	0.0342356	0.0427438	704.887
PURA_HUMAN.H10MO.D	1.81299	0.0344937	0.905452	0.903449	0.0255664	0.0290666	0.020024	709.208
AJ_E2F1::ELK1_003	1.81235	0.0345183	0.776871	0.774275	0.0340738	0.0376719	0.0229094	708.432
AJ_TFAP2C::DLX3_002	1.81212	0.0345331	0.787342	0.78539	0.0257095	0.0283278	0.0232872	708.341
TA0357_MESP1_DBD_dimer	1.80213	0.0352094	0.945839	0.943762	0.0302867	0.0302858	0.0359796	705.979
AJ_TEAD4::TCF3	1.80273	0.0352228	0.841743	0.839397	0.0322913	0.0342207	0.028352	707.337
TA0163_GCM1_full_monomer	1.80058	0.0352378	0.849486	0.847043	0.0385471	0.0356405	0.0479943	704.381
MA0646.1 GCM1	1.79895	0.0353646	0.849405	0.846963	0.0385646	0.0356489	0.0481798	704.377
CUX1_HUMAN.H10MO.C	1.78747	0.0362961	0.862758	0.860687	0.0323104	0.0304227	0.0462513	704.73
TA0308_TBX21_full_monomer	1.78742	0.0363456	0.861453	0.858619	0.0426162	0.0416541	0.0404767	705.487
MA0690.1 TBX21	1.78742	0.0363456	0.861453	0.858619	0.0426162	0.0416541	0.0404767	705.487
TA0394_CREB3L1_DBD_dimer	1.7841	0.0367729	0.768565	0.765473	0.0397334	0.0455963	0.0207151	709.476
TA0185_IRF9_full_trimer	1.77179	0.0375497	0.749017	0.746307	0.043251	0.0401625	0.0499831	704.462
MA0653.1 IRF9	1.77179	0.0375497	0.749017	0.746307	0.043251	0.0401625	0.0499831	704.462
ETS0027 h-SPI1	1.75684	0.0389169	0.937263	0.935408	0.0270503	0.0277576	0.0359817	706.563
AJ_GCM2::DLX3_002	1.75364	0.0389671	0.820501	0.81858	0.033165	0.028742	0.0640771	703.238
AJ_ETV2::SPDEF	1.75649	0.0389881	0.769017	0.76666	0.0330738	0.0352778	0.0308338	707.498
MA0877.1 Barhl1	1.75297	0.0390854	0.928318	0.926462	0.030769	0.0277936	0.0565958	703.952
AJ_ETV2::GSC2_005	1.75129	0.0393401	0.80072	0.798649	0.0316052	0.0310793	0.0427	705.616
TA0499_Barhl1_DBD_monomer	1.74925	0.0394029	0.928308	0.926456	0.0307745	0.0277978	0.0569835	703.952
AJ_GCM1::SPDEF_002	1.75133	0.039432	0.743302	0.740915	0.033439	0.0358365	0.0306119	707.618
AJ_ETV2::SOX15_001	1.74226	0.0399054	0.778186	0.776179	0.0356888	0.0302234	0.0697475	702.865
AJ_RORB_002	1.73432	0.0407931	0.734583	0.732401	0.0340785	0.0330641	0.0463614	705.333
MA0081.1 SPIB	1.73288	0.0410424	0.985757	0.984453	0.0183296	0.0197896	0.031041	707.806
AJ_ERF::PITX1_002	1.7324	0.0410622	0.805716	0.803718	0.0286905	0.0303309	0.0338459	707.276
AJ_GCM1::HOXB13_002	1.72166	0.0420082	0.829758	0.827967	0.0261596	0.0273461	0.0362627	707.002
AJ_HOXB2::TBX3	1.71269	0.0427776	0.839876	0.83752	0.0358912	0.0361406	0.0425362	706.133
AJ_CLOCK::FIGLA_001	1.70381	0.0435841	0.807293	0.805275	0.0312103	0.0311339	0.0448137	705.926
AJ_FLI1::ETV7	1.69072	0.0449045	0.789401	0.787078	0.0334366	0.0361231	0.0342603	707.823
MA0622.1 Mlxip	1.68925	0.0449692	0.883294	0.879503	0.058269	0.0589689	0.043925	706.246
THAP1_HUMAN.H10MO.D	1.68571	0.045377	0.774885	0.771927	0.0428864	0.0461439	0.03523	707.718
MA0007.2 AR	1.66905	0.046883	0.865934	0.86365	0.0366591	0.0359575	0.0509758	705.562
TA0869_CREB3L1_DBD_dimer	1.66522	0.0474489	0.765485	0.762629	0.0389757	0.0451135	0.0274396	709.729
BU0014 Esrra_primary	1.65233	0.0485906	0.852358	0.849951	0.0378412	0.0382736	0.0475903	706.233
AJ_GCM2::DRGX_001	1.65002	0.0488637	0.813275	0.811354	0.029335	0.0306025	0.0429196	706.953
TA0750_Rarb_DBD_dimer	1.64024	0.0497714	0.765035	0.762672	0.0389926	0.0378431	0.0558462	705.339
TA0040_GLI2_DBD_monomer	1.63247	0.0505088	0.848343	0.846262	0.0361491	0.0334795	0.0652713	704.412
TA0055_PRDM1_full_monomer_dimer	1.6193	0.0520375	0.811965	0.809549	0.0384452	0.0392257	0.0495242	706.432
AJ_TFAP4::DLX3_001	1.58997	0.0551303	0.7849	0.782819	0.0365336	0.0343699	0.0673898	704.713
MA0510.1 RFX5	1.58544	0.0556355	0.879399	0.877572	0.0322502	0.030269	0.0683988	704.667
TFE3_HUMAN.H10MO.C	1.57843	0.0564731	0.920695	0.918486	0.0381356	0.0367741	0.0641114	705.207
MA0050.1 IRF1	1.56611	0.0579171	0.875617	0.873391	0.038095	0.0373486	0.0625061	705.552
TA0291_TBR1_full_monomer	1.56517	0.0579326	0.833472	0.831023	0.0444745	0.0410916	0.0740431	704.367
TA0223_NFIX_full_dimer	1.565	0.0580316	0.817798	0.815273	0.0436306	0.0423852	0.0643511	705.359
AJ_ETV2::CLOCK	1.56487	0.0581419	0.783456	0.781523	0.0312539	0.0324702	0.0523254	706.854
TFAP4_HUMAN.H10MO.C	1.56447	0.0582098	0.889856	0.8872	0.042272	0.0446306	0.0496567	707.244
TA0127_ERG_full_dimer	1.55567	0.0591749	0.764204	0.761961	0.0377707	0.0379001	0.0594957	706.055
AJ_ELK1::SREBF2_002	1.55341	0.0593905	0.759592	0.757651	0.0338735	0.0328144	0.0663099	705.301
AJ_GCM1::ELF1_002	1.54347	0.060697	0.831242	0.829338	0.0308316	0.0324265	0.052621	707.15
TA0268_RFX4_DBD_dimer	1.53859	0.0608525	0.814433	0.812163	0.0474266	0.0386913	0.104169	702.298
MA0799.1 RFX4	1.53859	0.0608525	0.814433	0.812163	0.0474266	0.0386913	0.104169	702.298
AJ_GCM1::ETV1	1.53957	0.0612002	0.843285	0.841058	0.0352837	0.0380328	0.0489229	707.765
TA0056_SCRT1_DBD_monomer	1.53853	0.061215	0.808417	0.806088	0.0400468	0.0397635	0.0635037	705.824
TBR1_HUMAN.H10MO.D	1.53669	0.0614288	0.818768	0.816443	0.0403293	0.0397712	0.0650152	705.676
AJ_GCM1::SOX2	1.53696	0.0614613	0.779503	0.777633	0.0309647	0.03198	0.0565302	706.714
TA0272_Rfx2_DBD_dimer	1.53174	0.0616999	0.785229	0.782744	0.0518507	0.042558	0.103827	702.387
TA0303_TBX20_full_monomer	1.52659	0.0626613	0.858869	0.85666	0.0387338	0.0380228	0.0671603	705.579
MA0689.1 TBX20	1.52659	0.0626613	0.858869	0.85666	0.0387338	0.0380228	0.0671603	705.579
TA0222_NFIB_full_dimer	1.52497	0.0628625	0.783551	0.781061	0.043698	0.0429072	0.0673161	705.584
MA0743.1 SCRT1	1.51686	0.0638918	0.808295	0.805997	0.0400833	0.0398065	0.0661867	705.828
ETV1_HUMAN.H10MO.B	1.51649	0.0640483	0.845513	0.843335	0.0351322	0.0377516	0.0520141	707.685
BU0013 Eomes_primary	1.51468	0.0640697	0.825081	0.823038	0.0378769	0.0354256	0.0782957	704.6
PRDM4_HUMAN.H10MO.D	1.50865	0.0649037	0.77019	0.768009	0.0389142	0.0379976	0.0705091	705.466
PAX5_HUMAN.H10MO.S	1.51001	0.0649304	0.964093	0.962465	0.0250854	0.0283516	0.0444727	709.04
HU0034_ZNF692	1.50404	0.0655996	0.844347	0.841601	0.0456718	0.0479934	0.0573606	707.129
TA0079_ZNF524_full_monomer	1.50386	0.0656941	0.801712	0.79934	0.0373573	0.0414742	0.0479933	708.545
PPARA_HUMAN.H10MO.C	1.5005	0.0659393	0.83497	0.832732	0.040327	0.0391855	0.0725496	705.364
AJ_MYBL1::TBX21	1.49412	0.0668608	0.786078	0.784067	0.0341476	0.0353637	0.0612182	706.779
TA0467_FOXO6_DBD_multimer	1.49257	0.0670716	0.767621	0.765326	0.0387701	0.0404098	0.0602343	706.932
TA0180_IRF5_full_monomer	1.48445	0.0680351	0.842223	0.840169	0.0372829	0.0363463	0.0740672	705.433
MLXPL_HUMAN.H10MO.D	1.4845	0.0681832	0.835152	0.833592	0.0254686	0.0276299	0.0540942	707.931
TA0458_FOXO1_DBD_multimer	1.4798	0.0687232	0.814709	0.812361	0.0408041	0.0417002	0.0655172	706.469
MA0691.1 TFAP4	1.47114	0.0697551	0.863177	0.860601	0.0487025	0.0459952	0.0823916	704.789
AJ_FLI1::FIGLA	1.47225	0.0697694	0.832187	0.8301	0.0355263	0.0372614	0.061638	707.083
AJ_TEAD4::CLOCK_001	1.45872	0.0714453	0.784908	0.783098	0.0344428	0.0326018	0.0837138	704.833
MA0138.1 REST	1.45798	0.071588	0.78136	0.779479	0.034973	0.0339027	0.0788958	705.315
TA0378_TFAP4_full_dimer	1.45315	0.072208	0.862882	0.860333	0.0487787	0.0460642	0.0850154	704.787
TA0818_SOX8_DBD_dimer	1.45229	0.0723574	0.746934	0.744458	0.0465821	0.044787	0.0813993	705.147
MA0513.1 SMAD2::SMAD3::SMAD4	1.44511	0.0734708	0.858085	0.856042	0.0359285	0.0371594	0.067832	706.748
MA0730.1 RARA.var.2	1.4408	0.0741181	0.761428	0.759386	0.0349653	0.0372544	0.0627866	707.471
AJ_ETV7::TBX21_002	1.43452	0.0750849	0.786218	0.784546	0.027115	0.0306448	0.0530387	709.039
MA0603.1 Arntl	1.43196	0.0752255	0.869718	0.867081	0.0499015	0.0483938	0.0825804	705.324
MA0508.1 PRDM1	1.43019	0.0756023	0.842058	0.840197	0.0325725	0.0341979	0.0669762	707.107
ZEB1_HUMAN.H10MO.B	1.42209	0.0766287	0.945616	0.943921	0.0325577	0.0313266	0.085696	705.162
MA0104.2 Mycn	1.42232	0.0767136	0.879227	0.87686	0.0422267	0.0437436	0.0706512	706.786
TA0374_TCF3_DBD_dimer	1.41718	0.0774236	0.945918	0.94382	0.0384669	0.0389122	0.0761034	706.236
MA0522.2 TCF3	1.41659	0.0775076	0.945974	0.94388	0.0384371	0.0388518	0.0763451	706.219
NR2C2_HUMAN.H10MO.A	1.41093	0.0782589	0.851141	0.849216	0.0371635	0.0358465	0.0868645	705.212
TA0726_RARA_DBD_dimer	1.41188	0.0782769	0.761204	0.759201	0.0349679	0.0372885	0.0665052	707.492
MA0825.1 MNT	1.40383	0.0794314	0.888347	0.885835	0.0451397	0.0470387	0.0721	706.927
AJ_GCM1::ETV4	1.40396	0.0794552	0.795293	0.793429	0.0325215	0.0349157	0.0663025	707.663
TA0275_RUNX2_DBD_dimer	1.40049	0.0798645	0.761684	0.759853	0.0343633	0.0343645	0.0808962	705.98
HU0026_ZNF264	1.39742	0.0802714	0.756252	0.754421	0.0354851	0.0344352	0.0876534	705.337
TA0360_MNT_DBD_dimer	1.39527	0.0807092	0.888425	0.885932	0.045071	0.0469697	0.0733185	706.928
TA0691_ESRRA_DBD_dimer	1.39084	0.081329	0.750174	0.748321	0.0346588	0.035012	0.0802624	706.205
SPIB_HUMAN.H10MO.B	1.38713	0.08184	0.893973	0.891994	0.038245	0.0374855	0.0871303	705.546
AJ_ETV2::FOXI1_001	1.38422	0.0823584	0.837995	0.836192	0.0333685	0.0342288	0.0781207	706.555
AJ_HOXD12::ETV1_001	1.38195	0.0827457	0.75822	0.756432	0.0322671	0.03402	0.0729423	707.21
TA0695_ESRRG_full_dimer	1.37125	0.0842309	0.761997	0.76014	0.0372672	0.0355696	0.095354	704.998
TA0179_IRF5_full_dimer	1.37152	0.0844011	0.794021	0.792231	0.0315172	0.0343293	0.0680861	708.036
AJ_GCM2::HOXA13	1.36906	0.0845802	0.760754	0.758976	0.0356023	0.0341254	0.0947822	705.084
AJ_ETV2::DLX3_002	1.36568	0.0849955	0.801893	0.800279	0.034313	0.0310319	0.108241	703.974
MA0014.1 Pax5	1.36555	0.0852243	0.857069	0.855846	0.0232288	0.0235514	0.083365	706.288
TA0282_GMEB2_DBD_dimer	1.36119	0.0860321	0.886709	0.884333	0.0416659	0.0458866	0.0674442	708.327
AJ_TFAP2C::MAX_001	1.35876	0.0862305	0.785768	0.783745	0.0399948	0.0391132	0.0920936	705.499
TA0845_TBX20_full_dimer	1.35834	0.0863262	0.780643	0.778753	0.03677	0.0365729	0.0885363	705.862
AJ_GCM1::SPDEF_005	1.35575	0.0867985	0.75774	0.755964	0.0333418	0.034438	0.0810346	706.716
AJ_ETV2::ETV7	1.35519	0.0869529	0.788329	0.786392	0.0348222	0.0375663	0.0723337	707.786
HU0031_ZNF684	1.35464	0.0870255	0.780537	0.778639	0.0344759	0.036853	0.0742343	707.553
AJ_CLOCK::NHLH1_002	1.35317	0.087096	0.78704	0.785392	0.0331224	0.0320084	0.0955894	705.251
TA0429_FOXB1_DBD_dimer	1.3503	0.0875029	0.784476	0.782583	0.0391629	0.0368227	0.102104	704.702
HU0020_ZNF519	1.34745	0.0880928	0.791341	0.78923	0.0405896	0.0411754	0.0860938	706.3
TA0278_RUNX3_DBD_dimer	1.34735	0.0881104	0.759594	0.757739	0.03564	0.036177	0.0859787	706.314
TA0376_TCF4_full_dimer	1.34648	0.0882353	0.955166	0.953917	0.0242107	0.0243616	0.0879663	706.117
TA0266_RFX3_DBD_dimer	1.34264	0.088457	0.798582	0.796506	0.0490048	0.0405664	0.13266	702.515
MA0798.1 RFX3	1.34264	0.088457	0.798582	0.796506	0.0490048	0.0405664	0.13266	702.515
REL_HUMAN.H10MO.C	1.33835	0.0894963	0.897993	0.896216	0.0357271	0.034881	0.0957942	705.464
HU0014_ZNF41	1.33822	0.089526	0.851911	0.850279	0.0326652	0.0320417	0.094793	705.563
RARG_HUMAN.H10MO.C	1.33588	0.0900069	0.84927	0.847923	0.025449	0.0265054	0.0824153	706.914
ID4_HUMAN.H10MO.D	1.3346	0.0901804	0.9277	0.925781	0.0370793	0.0377991	0.0871161	706.412
AJ_ETV2::PAX5	1.33026	0.0908626	0.746863	0.745376	0.0293265	0.0293714	0.0916024	706.013
AJ_TEAD4::MAX_001	1.32724	0.091414	0.800878	0.799004	0.0358034	0.0371033	0.0848356	706.794
MA0080.2 SPI1	1.32453	0.091834	0.96044	0.958754	0.0328559	0.0334549	0.0889978	706.385
SMAD3_HUMAN.H10MO.C	1.32135	0.0923224	0.92443	0.922872	0.031155	0.030997	0.0945106	705.868
MA0512.1 Rxra	1.3172	0.0930541	0.914221	0.912419	0.0352744	0.0359635	0.0899273	706.414
SCRT2_HUMAN.H10MO.D	1.31313	0.0936846	0.816661	0.814448	0.0448114	0.0442966	0.0973083	705.728
TA0464_FOXO4_DBD_multimer	1.30056	0.0959041	0.823686	0.821801	0.0364833	0.0381001	0.0875627	706.978
AJ_MGA::DLX3_001	1.29688	0.0964529	0.840179	0.83844	0.0354329	0.0352297	0.0988133	705.853
TA0167_TCF7L1_full_monomer	1.28739	0.0977782	0.834489	0.832583	0.0455106	0.0388506	0.135474	702.993
TA0129_ETS1_DBD_dimer	1.2841	0.0987992	0.766241	0.764576	0.0315687	0.0340996	0.0831873	707.819
NKX23_HUMAN.H10MO.D	1.2831	0.0988217	0.892966	0.891191	0.0369161	0.0363596	0.103313	705.65
ERR1_HUMAN.H10MO.D	1.27278	0.100799	0.862814	0.861111	0.0323899	0.0351894	0.083859	707.968
TA0297_TBX1_DBD_monomer	1.26369	0.102365	0.897072	0.894852	0.0439505	0.0461706	0.0925503	707.122
MA0805.1 TBX1	1.26369	0.102365	0.897072	0.894852	0.0439505	0.0461706	0.0925503	707.122
AJ_GCM1::ONECUT2_001	1.26146	0.102698	0.749516	0.747934	0.0326522	0.0329476	0.101773	706.18
ARNT2_HUMAN.H10MO.D	1.24654	0.105581	0.909899	0.908496	0.0261821	0.0295875	0.0800874	709.036
AJ_CLOCK::BHLHA15	1.24259	0.106239	0.804819	0.803355	0.0287189	0.0309806	0.0905235	707.785
AJ_FLI1::CEBPD	1.23702	0.106674	0.780939	0.77946	0.0386764	0.0313361	0.157466	702.198
BU0043 Max_primary	1.23782	0.107037	0.827445	0.825604	0.0380897	0.0390866	0.102303	706.564
TA0152_SPDEF_full_monomer	1.23657	0.107083	0.815887	0.814318	0.035869	0.0333353	0.125155	704.478
MA0464.1 Bhlhe40	1.23449	0.107677	0.896587	0.894696	0.0387383	0.0402695	0.100042	706.868
MA0112.2 ESR1	1.23247	0.10811	0.775275	0.773635	0.0324693	0.0349968	0.0924922	707.763
MA0820.1 FIGLA	1.22799	0.108925	0.920472	0.918814	0.0334347	0.0354983	0.0965752	707.383
AJ_CLOCK::FIGLA_002	1.22825	0.108956	0.819031	0.817608	0.0272103	0.0304853	0.0849961	708.795
TA0348_FIGLA_DBD_dimer	1.22399	0.109677	0.920486	0.918832	0.0334306	0.0355116	0.0971926	707.395
TA0694_ESRRG_full_dimer	1.2177	0.110758	0.766056	0.764554	0.0325108	0.0324159	0.112538	705.915
ZN589_HUMAN.H10MO.D	1.20936	0.112263	0.914968	0.914173	0.018109	0.0172622	0.124514	704.973
ESR2_HUMAN.H10MO.S	1.20847	0.112506	0.974053	0.97263	0.0312371	0.0309417	0.115812	705.772
BCL6_HUMAN.H10MO.C	1.19593	0.114947	0.852071	0.850723	0.0296308	0.0296192	0.116152	705.971
AJ_MEIS1::ELF1	1.19116	0.115726	0.847694	0.845868	0.0435382	0.0402698	0.135182	704.388
TBX5_HUMAN.H10MO.D	1.18779	0.11653	0.937147	0.935627	0.0338178	0.0336263	0.118966	705.855
TA0351_HEY1_DBD_dimer	1.18672	0.116901	0.850145	0.847878	0.0459048	0.0502241	0.097603	708.153
MA0823.1 HEY1	1.18328	0.117583	0.850165	0.847907	0.0458528	0.0501777	0.0982068	708.158
TA0293_TBX15_DBD_monomer	1.17997	0.118166	0.895802	0.893795	0.042767	0.0447148	0.109021	707.007
MA0803.1 TBX15	1.17997	0.118166	0.895802	0.893795	0.042767	0.0447148	0.109021	707.007
AJ_GCM2::DLX2	1.1777	0.118214	0.813045	0.811692	0.0351048	0.0301458	0.155519	703.088
MA0093.2 USF1	1.16405	0.1211	0.872411	0.870524	0.046513	0.0425637	0.143237	704.188
MA0469.2 E2F3	1.15564	0.122854	0.746001	0.744511	0.0362513	0.0338603	0.140129	704.574
GCR_HUMAN.H10MO.S	1.14779	0.124589	0.974511	0.973403	0.0255144	0.0253622	0.127118	705.848
HU0003_ZFP3	1.14835	0.124598	0.767191	0.765593	0.0342658	0.0365998	0.110434	707.533
AJ_ALX4::TBX21_002	1.14654	0.124859	0.831046	0.829372	0.0383544	0.0383792	0.125829	705.994
MA0617.1 Id2	1.14443	0.125303	0.88005	0.877556	0.0570322	0.057286	0.125382	706.078
TA0823_SOX9_full_dimer	1.14098	0.125962	0.710845	0.709031	0.0428669	0.0417871	0.133113	705.431
ELF2_HUMAN.H10MO.C	1.13877	0.126611	0.880698	0.879182	0.0321957	0.0350002	0.108369	707.985
TA0106_E2F3_DBD_dimer	1.13697	0.126711	0.746027	0.744561	0.0362305	0.0338574	0.143932	704.584
MA0092.1 Hand1::Tcf3	1.13333	0.127635	0.928603	0.927386	0.0277962	0.0282217	0.125183	706.32
MA0068.1 Pax4	1.13083	0.128081	0.803532	0.802439	0.0260588	0.0253897	0.135366	705.421
MA0073.1 RREB1	1.13103	0.128117	0.853763	0.851946	0.0415672	0.0422082	0.125639	706.322
AJ_TEAD4::FOXI1_003	1.13018	0.12824	0.786152	0.784993	0.0273537	0.0269608	0.132786	705.665
P73_HUMAN.H10MO.S	1.12833	0.128703	0.924997	0.923786	0.0274949	0.0282133	0.123761	706.563
TA0790_SOX10_full_dimer	1.12641	0.128959	0.74193	0.740011	0.0471633	0.0447452	0.142596	704.879
HU0006_CTCF	1.12654	0.129089	0.803046	0.800916	0.0482381	0.0496972	0.123205	706.656
RXRA_HUMAN.H10MO.C	1.09603	0.135669	0.824312	0.823052	0.0289724	0.0302163	0.126851	706.947
TA0763_Vdr_DBD_dimer	1.09392	0.135981	0.787574	0.786195	0.0344281	0.0331301	0.146281	705.164
MA0035.1 Gata1	1.09435	0.136026	0.997622	0.997401	0.00510379	0.0052885	0.128732	706.792
TA0314_TBX5_DBD_monomer	1.08799	0.137357	0.924131	0.922639	0.0360763	0.0360371	0.138743	705.955
MA0807.1 TBX5	1.08799	0.137357	0.924131	0.922639	0.0360763	0.0360371	0.138743	705.955
PRDM1_HUMAN.H10MO.C	1.07968	0.139204	0.835639	0.834143	0.0363522	0.0364074	0.139969	706.013
MA0138.2 REST	1.07545	0.140196	0.731732	0.730221	0.0358928	0.0369276	0.134559	706.624
ZEP1_HUMAN.H10MO.D	1.07411	0.140433	0.867554	0.866028	0.0375386	0.0373396	0.142828	705.863
BU0030 Hnf4a_primary	1.07414	0.140579	0.854118	0.852736	0.031183	0.0338419	0.12236	707.941
MAFG_HUMAN.H10MO.C	1.07323	0.140582	0.758618	0.757269	0.0340422	0.0330011	0.149138	705.316
NR1I2_HUMAN.H10MO.S	1.07295	0.140671	0.963291	0.962192	0.027365	0.0269097	0.145807	705.616
AJ_PITX1::HES7_003	1.0646	0.142412	0.809568	0.80849	0.0289326	0.0265976	0.163716	704.273
ZN652_HUMAN.H10MO.D	1.06287	0.143017	0.834542	0.832741	0.0435637	0.044542	0.138845	706.48
VDR_HUMAN.H10MO.B	1.04021	0.148279	0.856438	0.855243	0.028463	0.0301978	0.13529	707.365
ZBTB4_HUMAN.H10MO.D	1.03877	0.148492	0.774498	0.773076	0.0363018	0.0359608	0.151878	705.773
HOMEO0169_Tcf1_2666.2	1.03661	0.149052	0.806229	0.804816	0.0350527	0.035829	0.144933	706.473
AJ_CUX1::HOXA13_001	1.03565	0.149307	0.773557	0.772191	0.0333344	0.0346702	0.141038	706.881
TBX20_HUMAN.H10MO.D	1.03196	0.150044	0.745059	0.743702	0.0354944	0.0345354	0.157739	705.392
AJ_TEAD4::ELK1_004	1.0278	0.151083	0.826033	0.824791	0.0316234	0.031752	0.151234	706.069
TA0148_SPDEF_DBD_monomer	1.02618	0.15152	0.765529	0.764226	0.0322124	0.0333649	0.14423	706.782
AJ_FOXO1::FLI1	1.02267	0.152421	0.829046	0.827656	0.0330596	0.0357452	0.134898	707.844
TA0395_CREB3L1_full_dimer	1.01277	0.154881	0.762065	0.760381	0.0376328	0.043738	0.120339	709.851
HU0022_ZBTB18	1.01084	0.155185	0.963848	0.961732	0.0524888	0.0550297	0.144984	707.073
AJ_ETV5::DRGX_002	1.00985	0.155197	0.835918	0.834802	0.0310965	0.0290303	0.172807	704.564
TA0161_GCM1_DBD_monomer	1.00615	0.156114	0.865808	0.864443	0.0376681	0.0356352	0.170541	704.822
AJ_ETV5::ETV7	1.00417	0.156741	0.793882	0.79248	0.0358772	0.0367056	0.152387	706.494
AJ_FOXO1::ELK1_003	1.0044	0.156743	0.808367	0.807029	0.0331389	0.035011	0.144701	707.26
ZN282_HUMAN.H10MO.D	0.996307	0.158555	0.877401	0.876389	0.0273437	0.026686	0.165515	705.456
AJ_ETV7_003	0.988996	0.160497	0.814052	0.812698	0.0337989	0.03601	0.14643	707.469
TA0732_RARG_DBD_dimer	0.985118	0.161362	0.77444	0.772959	0.0389448	0.0395211	0.158956	706.308
MA0596.1 SREBF2	0.983104	0.161907	0.885147	0.883669	0.0378699	0.039521	0.15279	706.962
MA0103.1 ZEB1	0.983393	0.161929	0.996543	0.99599	0.013393	0.0147915	0.139282	708.403
TFCP2_HUMAN.H10MO.D	0.98179	0.162214	0.878702	0.877709	0.0257108	0.0265731	0.155419	706.731
AJ_FOXO1::ELF1_001	0.97828	0.16301	0.811751	0.810199	0.0419176	0.0416877	0.165444	705.859
SCRT1_HUMAN.H10MO.D	0.972213	0.164511	0.817871	0.816351	0.0413759	0.0410755	0.167371	705.82
MA0038.1 Gfi1	0.971799	0.164536	0.925724	0.924554	0.0331337	0.031633	0.176744	705.004
MA0504.1 NR2C2	0.960753	0.1674	0.858265	0.857038	0.0334075	0.0335583	0.167432	706.079
HU0025_ZNF16	0.949068	0.170439	0.804327	0.80294	0.036493	0.0384238	0.159195	707.177
AJ_GCM1::ELK1_002	0.949013	0.170575	0.818168	0.816718	0.0353324	0.0402021	0.140786	709.231
AJ_ETV2::EOMES_002	0.94686	0.170835	0.847799	0.846546	0.0361267	0.0347823	0.180997	705.175
TA0069_ZBTB7C_full_monomer	0.940627	0.172618	0.860356	0.85915	0.0315525	0.0336886	0.158035	707.523
MA0695.1 ZBTB7C	0.934469	0.174203	0.860295	0.859097	0.0315631	0.0337108	0.159546	707.531
ZN713_HUMAN.H10MO.D	0.932403	0.174646	0.845819	0.844611	0.0335584	0.0340332	0.172392	706.294
MA0141.1 Esrrb	0.926735	0.17612	0.883731	0.882208	0.0424596	0.043191	0.173143	706.362
MA0093.1 USF1	0.92415	0.176666	0.917328	0.91556	0.052751	0.050269	0.189219	704.967
TA0173_HSF4_DBD_trimer	0.92358	0.176894	0.842299	0.840787	0.0434085	0.0430411	0.18002	705.794
MA0771.1 HSF4	0.92358	0.176894	0.842299	0.840787	0.0434085	0.0430411	0.18002	705.794
AJ_ERF::FIGLA	0.921216	0.177657	0.821339	0.820031	0.0346177	0.0373173	0.160796	707.767
TA0698_Esrra_DBD_monomer	0.905799	0.181598	0.831062	0.829437	0.0467046	0.0471349	0.180511	706.183
AJ_GCM2::ELK1	0.900242	0.183244	0.816984	0.815867	0.0291886	0.0326372	0.157659	708.74
NFAC4_HUMAN.H10MO.C	0.897889	0.183896	0.934373	0.933417	0.0246261	0.0280015	0.154301	709.212
AJ_PITX1::TBX21	0.89647	0.183995	0.787671	0.786614	0.0321062	0.0309925	0.193433	705.228
MYC_HUMAN.H10MO.A	0.894434	0.184611	0.854439	0.85303	0.0413299	0.0414117	0.185232	706.023
AJ_TBX3	0.892446	0.18506	0.956795	0.955737	0.032456	0.031153	0.195822	705.112
MA0141.2 Esrrb	0.887759	0.186433	0.883721	0.882262	0.0424222	0.0432136	0.183136	706.395
TA0490_BARHL2_DBD_monomer	0.886451	0.186506	0.931119	0.930137	0.0327008	0.029089	0.214898	703.681
BU0089 Tcfe2a_primary	0.886217	0.186825	0.857937	0.856781	0.0340931	0.0342925	0.186531	706.109
TA0493_BARHL2_full_monomer	0.884722	0.187007	0.924246	0.923178	0.0351099	0.0317009	0.211961	703.944
AJ_ETV2::EOMES_003	0.880549	0.188374	0.769878	0.768811	0.0313757	0.0318421	0.185965	706.31
MA0503.1 Nkx2-5.var.2	0.87885	0.188798	0.904153	0.903022	0.0339744	0.0338108	0.191022	705.873
AJ_GCM1::SPDEF_004	0.876787	0.189648	0.765213	0.764169	0.0261746	0.0313166	0.147949	710.743
MA0105.3 NFKB1	0.868983	0.191575	0.881911	0.880563	0.0390105	0.0407727	0.182197	706.998
MA0592.2 Esrra	0.868124	0.191748	0.830958	0.829402	0.0467029	0.0471323	0.190669	706.183
AJ_ELK1::TEF	0.864338	0.191889	0.76145	0.760338	0.0470834	0.0336694	0.267213	700.604
AJ_ELK1::PAX5	0.86711	0.192279	0.742395	0.741388	0.0257502	0.0305611	0.152547	710.49
MA0734.1 GLI2	0.857599	0.194701	0.818077	0.816808	0.037319	0.0388867	0.186067	706.925
AJ_HOXB2::ELK3_001	0.852228	0.195938	0.789271	0.788241	0.03465	0.0317187	0.21747	704.195
TA0700_HNF4A_DBD_dimer	0.852314	0.196028	0.795505	0.794404	0.0351064	0.0339418	0.204974	705.26
HXB1_HUMAN.H10MO.D	0.841561	0.199066	0.857066	0.855569	0.0474442	0.0467584	0.203527	705.663
TA0302_TBX20_DBD_monomer	0.838715	0.199859	0.828139	0.826949	0.0379175	0.0372702	0.204933	705.606
TA0041_GLI2_DBD_monomer	0.831968	0.201865	0.818263	0.817032	0.0373032	0.0388735	0.193274	706.927
MA0080.1 SPI1	0.826107	0.203699	0.996192	0.995973	0.00595255	0.00696179	0.167743	710.04
TA0853_E2F1_DBD_monomer	0.824005	0.203999	0.801671	0.800613	0.0346596	0.0337267	0.211363	705.394
AJ_MYBL1::ELF1	0.820059	0.205334	0.764016	0.762885	0.0329415	0.0362569	0.183884	708.312
AJ_ETV2::SOX15_002	0.819995	0.20537	0.792889	0.791969	0.0264981	0.029507	0.181155	708.627
NR2F6_HUMAN.H10MO.D	0.814912	0.206752	0.872971	0.872189	0.0237387	0.0252446	0.193454	707.423
AJ_GCM1::MAX_001	0.812531	0.20747	0.783091	0.781806	0.0382366	0.0415721	0.18897	707.988
AJ_TFAP4::DLX3_003	0.811858	0.207548	0.825284	0.824386	0.0286612	0.0290577	0.205418	706.286
REST_HUMAN.H10MO.A	0.809076	0.208421	0.724107	0.722978	0.0346593	0.0366795	0.196288	707.302
ETS0009 h-Elk4	0.807766	0.208941	0.878712	0.877083	0.0454956	0.0530452	0.173892	709.946
TA0177_IRF3_full_trimer	0.801873	0.210404	0.757507	0.756387	0.036677	0.0366918	0.211356	705.988
BHE41_HUMAN.H10MO.D	0.801911	0.210582	0.866013	0.86506	0.0278053	0.0312608	0.184238	708.892
COT2_HUMAN.H10MO.S	0.79399	0.212638	0.846499	0.845554	0.0321947	0.0312387	0.220549	705.335
PKNX2_HUMAN.H10MO.D	0.789536	0.214078	0.88287	0.882004	0.0274845	0.0288415	0.204005	707.095
AJ_GCM2::HES7	0.77961	0.216951	0.793396	0.792346	0.0345482	0.0353712	0.212602	706.511
TA0724_RARA_DBD_dimer	0.778163	0.217416	0.764915	0.763878	0.0334554	0.0350354	0.207866	707.045
AJ_ETV2::SOX15_003	0.773501	0.218783	0.770575	0.769667	0.0296709	0.0308602	0.21083	706.881
HOMEO0115_Nkx2-4_3074.1	0.77049	0.219486	0.845766	0.84489	0.0318549	0.0298629	0.234948	704.645
XBP1_HUMAN.H10MO.C	0.759366	0.222955	0.825302	0.824149	0.0392532	0.0399109	0.220219	706.352
AJ_ETV5::FOXI1_001	0.759408	0.223072	0.852461	0.851521	0.0294922	0.0325341	0.201593	708.372
AJ_TEAD4::SPIB_002	0.738839	0.229173	0.791714	0.790669	0.0360869	0.0371704	0.223554	706.651
TA0400_Creb3l2_DBD_dimer	0.738669	0.229285	0.793772	0.792611	0.0386324	0.0413278	0.21508	707.572
HOMEO0173_Titf1_1722.2	0.728922	0.232004	0.830778	0.829907	0.0339252	0.0313875	0.24988	704.393
ATF3_HUMAN.H10MO.A	0.725647	0.232962	0.935899	0.935117	0.0312821	0.028298	0.25555	703.978
AJ_PITX1::EOMES_001	0.723022	0.233885	0.813607	0.812743	0.0327785	0.0314076	0.244191	705.077
TA0760_THRB_DBD_dimer	0.720404	0.234856	0.742438	0.741458	0.0339128	0.0357779	0.223936	707.226
AJ_TEAD4::GATA3	0.720148	0.234874	0.817324	0.816488	0.0300087	0.0304777	0.232441	706.327
TA0690_ESRRA_DBD_monomer	0.720072	0.234894	0.880302	0.879101	0.0432466	0.0438217	0.23297	706.275
AJ_ELK1::PAX1	0.719348	0.235287	0.744704	0.74387	0.0268913	0.0304963	0.207911	709.136
AJ_GCM1::ETV7_001	0.712393	0.237373	0.785248	0.784374	0.0298161	0.0322866	0.220642	707.883
EOMES_HUMAN.H10MO.D	0.710423	0.237977	0.895876	0.895038	0.0287667	0.0310039	0.22233	707.762
AJ_HOXB2::TBX21_002	0.706216	0.239125	0.76801	0.767206	0.0306022	0.0298922	0.245184	705.474
TA0125_ERG_DBD_dimer	0.705007	0.239579	0.780025	0.779013	0.0369011	0.0377175	0.235771	706.473
AJ_ERF::HES7_001	0.689877	0.244338	0.756599	0.755692	0.0334625	0.0345733	0.238222	706.723
TA0287_MGA_DBD_monomer	0.689661	0.244416	0.911409	0.910308	0.0404044	0.041993	0.237008	706.863
MA0801.1 MGA	0.689661	0.244416	0.911409	0.910308	0.0404044	0.041993	0.237008	706.863
TA0754_Rarg_DBD_dimer	0.685253	0.245721	0.746773	0.745769	0.0390194	0.0384848	0.249628	705.679
AJ_ERF::TBX21_002	0.684211	0.245979	0.84685	0.845949	0.0364882	0.034601	0.258157	704.869
AJ_HOXB2::TCF3_002	0.674747	0.249044	0.82967	0.828796	0.0346874	0.0340229	0.254087	705.561
AJ_TFAP2C::ONECUT2_003	0.673943	0.249367	0.760586	0.759882	0.0268648	0.0274273	0.245893	706.446
HU0037_ZNF415	0.671018	0.250429	0.85372	0.852848	0.030635	0.0341437	0.227777	708.651
TA0105_E2F3_DBD_dimer	0.669754	0.2505	0.737346	0.736439	0.0390219	0.0355671	0.270584	704.115
TA0355_MAX_DBD_dimer	0.668531	0.251139	0.752976	0.751945	0.0385829	0.0405305	0.241537	707.121
MA0860.1 Rarg.var.2	0.667304	0.251431	0.74665	0.745672	0.0389879	0.0384824	0.255124	705.695
ETS0004 h-ELF3	0.665687	0.251961	0.924058	0.923356	0.0278627	0.0277066	0.254089	705.856
PAX6_HUMAN.H10MO.D	0.663718	0.252606	0.865299	0.8645	0.0315665	0.0316349	0.253091	706.027
FOXK1_HUMAN.H10MO.D	0.658701	0.254273	0.892494	0.891802	0.0266009	0.0276092	0.24733	706.831
AJ_HOXB2::ESRRB_002	0.656575	0.254904	0.777514	0.776687	0.0329941	0.0331	0.255168	706.05
HU0005_ZSCAN22	0.656038	0.255097	0.817418	0.816457	0.0379288	0.038515	0.252809	706.323
AJ_TFAP2C::ONECUT2_001	0.655773	0.255236	0.763918	0.763196	0.0275295	0.0289523	0.245486	707.149
CTCF_HUMAN.H10MO.A	0.648323	0.257627	0.806748	0.805715	0.0402627	0.0418635	0.250364	706.874
AJ_ERF::FOXI1_002	0.642751	0.259458	0.865515	0.864775	0.0286688	0.0302496	0.249117	707.229
HAND1_HUMAN.H10MO.D	0.640994	0.260061	0.898302	0.897563	0.0280597	0.030283	0.24491	707.796
AJ_TEAD4::SPIB_001	0.640035	0.26028	0.808067	0.807153	0.0370259	0.0375136	0.25849	706.272
RARA_HUMAN.H10MO.S	0.631812	0.262933	0.946493	0.944816	0.0702545	0.0697599	0.265289	705.825
TA0084_ZSCAN4_full_monomer	0.623446	0.265717	0.793567	0.792637	0.0385794	0.0391819	0.26346	706.326
AJ_ETV2::CEBPD	0.62127	0.265845	0.799874	0.79914	0.0404821	0.0309766	0.316587	701.418
BU0056 Rfxdc2_primary	0.615615	0.268185	0.835622	0.834737	0.0398853	0.0377645	0.279912	704.839
GN_IRF8_TOP5000	0.614672	0.268644	0.854887	0.854117	0.0317971	0.0329504	0.262291	706.794
BC11A_HUMAN.H10MO.C	0.613927	0.268915	0.855648	0.854947	0.0284817	0.0300239	0.259038	707.206
MA0114.2 HNF4A	0.609945	0.270103	0.862038	0.861218	0.0365022	0.0353151	0.277551	705.274
TFE2_HUMAN.H10MO.C	0.606681	0.271315	0.90495	0.90418	0.0317522	0.033357	0.262214	707.122
MA0494.1 Nr1h3::Rxra	0.604913	0.27172	0.834197	0.833545	0.0302348	0.028321	0.285378	704.629
AJ_CUX1::TBX21_002	0.604012	0.272205	0.845249	0.844491	0.0313657	0.0329815	0.262938	707.145
AJ_ETV2::FIGLA_001	0.598361	0.274133	0.778519	0.777786	0.029698	0.0321953	0.258644	707.912
MESP1_HUMAN.H10MO.D	0.594206	0.275407	0.933388	0.932519	0.0384825	0.0384712	0.27634	705.973
TCF7_HUMAN.H10MO.C	0.589791	0.276843	0.900936	0.900252	0.0313789	0.0304672	0.283441	705.348
AJ_FLI1::TCF3	0.589946	0.276944	0.849509	0.848797	0.0294691	0.0317439	0.2629	707.748
TA0824_SOX9_full_dimer	0.5879	0.277503	0.710126	0.709137	0.0448248	0.0441751	0.281214	705.662
AJ_E2F3::FOXI1	0.584847	0.278711	0.780036	0.779104	0.0374021	0.041934	0.256491	708.815
AJ_HOXB2::EOMES_002	0.583747	0.278996	0.853867	0.853209	0.0282022	0.0296098	0.27023	707.108
HOMEO0141_Pitx3_3497.2	0.58176	0.279652	0.792914	0.79215	0.0332078	0.0345087	0.272956	706.86
AJ_ETV5::FOXI1_003	0.563771	0.285797	0.8444	0.843748	0.0284164	0.0304034	0.273499	707.576
TA0093_TFCP2_full_dimer	0.55289	0.289529	0.789661	0.789021	0.0282865	0.0304631	0.276102	707.742
TA0851_RXRG_full_dimer	0.543419	0.292704	0.771031	0.770152	0.042031	0.0425373	0.291294	706.247
AJ_ERF::FOXO1	0.539694	0.29392	0.876674	0.876054	0.031247	0.0301464	0.301273	705.217
MA0130.1 ZNF354C	0.534401	0.295843	0.994545	0.994301	0.0117286	0.0120339	0.291901	706.561
MA0080.3 Spi1	0.527207	0.298303	0.868418	0.867753	0.0332021	0.0331239	0.299532	705.928
BU0077 Spdef_primary	0.523424	0.299673	0.827549	0.826886	0.0321663	0.0333039	0.294118	706.773
MA0114.1 HNF4A	0.519336	0.300912	0.863648	0.86294	0.0391671	0.0357616	0.317517	704.147
MA0147.1 Myc	0.51174	0.303721	0.880576	0.879819	0.038678	0.0388927	0.303519	706.102
TA0284_GMEB2_DBD_dimer	0.510711	0.303937	0.745102	0.744445	0.0369744	0.0337961	0.320155	704.167
TA0630_NKX2-3_DBD_monomer	0.508839	0.304735	0.901813	0.901152	0.0340775	0.0341348	0.305217	706.016
TA0693_ESRRB_DBD_monomer	0.504914	0.306111	0.847125	0.846192	0.0486584	0.0485553	0.307258	705.933
MA0098.1 ETS1	0.499648	0.308065	0.997616	0.997556	0.00295701	0.00318295	0.295647	707.729
MAX_HUMAN.H10MO.A	0.494745	0.309807	0.868982	0.868191	0.038749	0.0420247	0.296103	707.923
MA0141.3 ESRRB	0.494113	0.309926	0.847163	0.84625	0.0486477	0.0485579	0.311007	705.939
AJ_TEAD4::DLX3_001	0.485123	0.312994	0.853249	0.852644	0.0357063	0.0327729	0.327915	704.244
TA0209_MYBL1_DBD_monomer	0.476277	0.316245	0.84345	0.842771	0.0382186	0.0374552	0.320354	705.544
AJ_ETV2::EVX1	0.471528	0.31796	0.808505	0.807951	0.0311033	0.0308404	0.320106	705.794
GATA1_HUMAN.H10MO.A	0.462245	0.321405	0.818463	0.817862	0.0313755	0.0341887	0.307556	708.046
ZN384_HUMAN.H10MO.C	0.454558	0.32407	0.903495	0.902865	0.036424	0.0363721	0.325013	705.948
ZBTB6_HUMAN.H10MO.D	0.450027	0.325831	0.856265	0.855713	0.0289668	0.0322373	0.308616	708.611
BU0029 Hic1_primary	0.447219	0.326781	0.837805	0.83718	0.0350291	0.0367024	0.319878	707.058
TBX21_HUMAN.H10MO.D	0.444353	0.327683	0.828255	0.82755	0.0442755	0.041681	0.337778	704.726
TA0688_Ar_DBD_dimer	0.441076	0.328977	0.799608	0.798996	0.0357986	0.0365149	0.32651	706.425
TA0728_RARA_full_dimer	0.440699	0.329115	0.760826	0.760206	0.0362206	0.0369826	0.326487	706.448
MA0139.1 CTCF	0.437795	0.330178	0.813598	0.812948	0.037948	0.0390081	0.326485	706.604
GLI2_HUMAN.H10MO.B	0.437151	0.330388	0.824137	0.823335	0.0478669	0.0482027	0.329974	706.135
AJ_TEAD4::DLX2_002	0.434758	0.331194	0.795096	0.794521	0.0362786	0.0347581	0.33847	705.075
AJ_FLI1::HOXB13_002	0.431536	0.33246	0.752526	0.751984	0.0320504	0.0330423	0.328344	706.672
GATA2_HUMAN.H10MO.A	0.429005	0.333404	0.900047	0.899406	0.0373937	0.0392715	0.326351	707.115
AJ_ETV7::TBX21_001	0.42658	0.334338	0.772544	0.77204	0.0282377	0.0310461	0.319854	708.283
MA0526.1 USF2	0.419649	0.336705	0.884844	0.884168	0.044559	0.0423307	0.345013	704.905
HOMEO0117_Nkx2-6_3437.1	0.418194	0.337356	0.828867	0.828307	0.0335877	0.0351938	0.330807	707.059
MA0659.1 MAFG	0.414356	0.338654	0.760169	0.759648	0.0345545	0.0330079	0.346078	705.015
AJ_GCM2::SOX15_004	0.411165	0.339889	0.796152	0.795711	0.0280638	0.028175	0.339951	706.067
COT1_HUMAN.H10MO.S	0.404188	0.342422	0.858108	0.857531	0.0385243	0.0375213	0.346913	705.413
MA0060.2 NFYA	0.399664	0.344169	0.794517	0.793926	0.0372851	0.0388179	0.338829	706.905
AJ_ETV2::TBX21_003	0.398564	0.344557	0.761641	0.761174	0.0301226	0.0308239	0.34181	706.499
TA0414_MAFG_full_dimer	0.397167	0.344993	0.759916	0.759416	0.0345551	0.0330332	0.352051	705.03
AJ_TEAD4::CEBPB_001	0.395347	0.345705	0.744586	0.744134	0.0304432	0.0300228	0.348337	705.677
RXRG_HUMAN.H10MO.B	0.391686	0.347039	0.815113	0.8145	0.0424246	0.0410802	0.352229	705.292
TA0361_MYF6_full_dimer	0.391771	0.347049	0.856518	0.855877	0.0428107	0.0429373	0.347252	706.045
MA0667.1 MYF6	0.390133	0.347657	0.856493	0.855856	0.0427777	0.0429226	0.347798	706.054
TA0162_GCM1_full_dimer	0.387081	0.348713	0.807439	0.806952	0.0351231	0.0330446	0.357789	704.714
MA0067.1 Pax2	0.386216	0.349135	0.96622	0.965901	0.0211947	0.0217387	0.346122	706.553
TA0734_RARG_full_dimer	0.383798	0.349966	0.761466	0.760966	0.0354087	0.0342033	0.355399	705.242
MA0858.1 Rarb.var.2	0.381949	0.350699	0.755483	0.754924	0.0382945	0.0384778	0.35064	706.085
TA0286_EOMES_DBD_dimer	0.378416	0.352017	0.743559	0.743069	0.0337448	0.0339908	0.35161	706.141
AJ_GCM1::HOXA13	0.377156	0.35238	0.792526	0.792074	0.0341393	0.0314287	0.364099	704.3
SPI1_HUMAN.H10MO.A	0.376522	0.352746	0.81547	0.814966	0.0341825	0.0351807	0.349309	706.633
TA0751_Rarb_DBD_dimer	0.373514	0.353844	0.755491	0.754944	0.0382707	0.0384919	0.353649	706.107
MA0649.1 HEY2	0.373118	0.354107	0.856915	0.85627	0.0400178	0.0454516	0.336236	709.18
TA0353_HEY2_full_dimer	0.370734	0.354997	0.856805	0.856165	0.0400257	0.0454595	0.337226	709.179
MA0483.1 Gfi1b	0.364226	0.357283	0.893663	0.893155	0.0376287	0.0366713	0.36131	705.426
RXRB_HUMAN.H10MO.C	0.360064	0.358903	0.919209	0.918772	0.0309245	0.0319138	0.355225	706.696
AJ_FOXO1::ELK1_002	0.358823	0.359421	0.845441	0.844922	0.0348453	0.0380497	0.347854	708.101
AJ_GCM1::ELK3_001	0.353756	0.361294	0.778945	0.778437	0.0357599	0.037755	0.354564	707.244
TA0613_Lhx8_DBD_dimer	0.352326	0.361773	0.794267	0.793771	0.0371944	0.0370055	0.36301	705.868
HOMEO0158_Rax_3443.1	0.348066	0.363372	0.821836	0.82136	0.0363013	0.035931	0.36526	705.756
NFKB2_HUMAN.H10MO.D	0.334736	0.368453	0.908119	0.907755	0.0274773	0.0285671	0.364046	706.871
TA0379_TFE3_DBD_dimer	0.331509	0.369584	0.878501	0.878007	0.0412203	0.0391003	0.376534	704.875
MA0520.1 Stat6	0.32807	0.37092	0.87285	0.872368	0.0394561	0.0385574	0.374262	705.483
MA0831.1 TFE3	0.325832	0.371738	0.878491	0.878006	0.0412294	0.039101	0.378605	704.871
MAFK_HUMAN.H10MO.A	0.320336	0.373861	0.76479	0.76439	0.0334616	0.0327909	0.376801	705.542
RARB_HUMAN.H10MO.D	0.317113	0.375083	0.928942	0.928439	0.0427286	0.0416838	0.378525	705.447
P63_HUMAN.H10MO.S	0.313343	0.376529	0.918502	0.918144	0.0304389	0.0299971	0.378758	705.662
HOMEO0111_Nkx1-1_3856.3	0.306043	0.379287	0.81931	0.818962	0.0312876	0.0299426	0.384771	705.052
TA0354_ID4_DBD_dimer	0.297279	0.38269	0.925478	0.925022	0.0399343	0.0403371	0.382045	706.203
AJ_E2F1::ELK1_002	0.296318	0.383146	0.774568	0.774108	0.0361137	0.040852	0.369033	709.065
MA0824.1 ID4	0.295933	0.383206	0.925518	0.925064	0.0399284	0.0403267	0.382576	706.2
NFYB_HUMAN.H10MO.A	0.288704	0.385963	0.850105	0.849582	0.0480411	0.0476271	0.387383	705.79
AJ_TFAP2C::HOXB13	0.283804	0.387943	0.780977	0.780652	0.0267546	0.030138	0.374874	708.946
ETS2_HUMAN.H10MO.C	0.282542	0.388431	0.930122	0.929826	0.0243628	0.0275267	0.375054	709.031
AJ_TEAD4::CEBPD_004	0.281887	0.388615	0.768794	0.768468	0.0294714	0.0303541	0.385876	706.65
AJ_FOXJ2::ELF1_002	0.281691	0.388668	0.792048	0.791585	0.0431109	0.0432272	0.388845	706.039
AJ_ERF::HES7_003	0.275876	0.391001	0.777815	0.777469	0.0289442	0.0329718	0.376952	709.264
TA0377_TFAP4_DBD_dimer	0.274344	0.391444	0.861372	0.860901	0.0478444	0.0450972	0.39792	704.751
COT1_HUMAN.H10MO.B	0.270425	0.393008	0.905752	0.90537	0.0372075	0.0371865	0.393514	705.967
TA0420_Mafb_DBD_dimer	0.267484	0.394122	0.801321	0.800979	0.0345005	0.0336025	0.397227	705.413
GN_inverted_IRF_AP1	0.266867	0.394323	0.859026	0.858702	0.0340732	0.0318071	0.401567	704.563
TA0372_SREBF2_DBD_dimer	0.261271	0.396491	0.829709	0.829259	0.0483211	0.0452481	0.4033	704.623
MA0896.1 Hmx1	0.260398	0.396832	0.815113	0.81475	0.0389269	0.0365784	0.403292	704.69
MA0828.1 SREBF2.var.2	0.258402	0.397602	0.829666	0.829221	0.0482882	0.045235	0.404305	704.63
HXA7_HUMAN.H10MO.D	0.257426	0.397968	0.858505	0.858268	0.0262152	0.0242116	0.405956	704.36
MA0672.1 NKX2-3	0.256205	0.398526	0.921726	0.921388	0.0338474	0.0346444	0.396644	706.505
TA0631_NKX2-3_full_monomer	0.256066	0.39858	0.921581	0.921243	0.0338807	0.0346801	0.396694	706.506
TA0866_ESRRA_DBD_monomer	0.253649	0.399498	0.884474	0.884074	0.0415036	0.0414407	0.400067	705.946
SUH_HUMAN.H10MO.C	0.253654	0.399506	0.935953	0.935662	0.0298296	0.0301839	0.398774	706.243
TA0321_TEAD4_DBD_monomer	0.247448	0.401959	0.933588	0.933271	0.0311789	0.0337231	0.394654	707.853
MA0809.1 TEAD4	0.245149	0.402852	0.933611	0.933296	0.0311582	0.0337036	0.395601	707.855
AJ_TFAP4::DLX3_004	0.244271	0.403131	0.796145	0.79585	0.0320254	0.0316916	0.404516	705.751
MAFA_HUMAN.H10MO.D	0.24345	0.403503	0.825314	0.825068	0.0249995	0.026651	0.39775	707.485
AJ_GCM1::ELK1_003	0.228967	0.409177	0.810672	0.810318	0.0357238	0.0406241	0.397528	709.214
TA0861_NFIX_full_dimer	0.225086	0.410575	0.799759	0.799403	0.0438191	0.0416352	0.415289	704.908
HU0019_ZNF71	0.216685	0.413893	0.779938	0.779654	0.0345679	0.0344154	0.414625	705.882
MA0467.1 Crx	0.216567	0.413954	0.872656	0.872351	0.0362529	0.0369749	0.412651	706.423
TA0108_E2F7_DBD_dimer	0.216149	0.414162	0.740631	0.740279	0.0389196	0.0428269	0.406172	708.305
IRF7_HUMAN.H10MO.C	0.215228	0.414456	0.928831	0.928581	0.0309463	0.030486	0.416054	705.654
MA0758.1 E2F7	0.213743	0.415103	0.740667	0.740319	0.0388966	0.0428091	0.407181	708.31
HMGA2_HUMAN.H10MO.D	0.212358	0.41552	0.825357	0.825048	0.0419764	0.038147	0.4234	704.061
PPARG_HUMAN.H10MO.A	0.212554	0.415535	0.831889	0.831658	0.0275216	0.0285675	0.412771	706.833
MA0060.1 NFYA	0.209759	0.416622	0.854858	0.854498	0.0440512	0.0451417	0.414965	706.532
HOMEO0024_Dlx5_3419.2	0.208867	0.416961	0.843274	0.842988	0.0357563	0.0360375	0.416675	706.153
AJ_GCM1::MAX_004	0.207899	0.417372	0.794293	0.793943	0.0416275	0.0442823	0.4126	707.431
HU0035_ZNF454	0.206874	0.417685	0.758892	0.75866	0.031826	0.029493	0.423923	704.424
AJ_ELK1::TBX21_003	0.205163	0.418441	0.725809	0.725589	0.0266967	0.0282323	0.414223	707.284
AJ_POU2F1::ELK1_002	0.204279	0.418766	0.834395	0.834164	0.0290841	0.0296272	0.417632	706.395
TA0288_MGA_DBD_dimer	0.201543	0.419833	0.733196	0.732915	0.036226	0.0365475	0.419478	706.176
TA0184_IRF8_full_dimer	0.199797	0.420496	0.767674	0.767379	0.0398932	0.0388081	0.422941	705.388
MA0652.1 IRF8	0.199797	0.420496	0.767674	0.767379	0.0398932	0.0388081	0.422941	705.388
TA0155_SPIC_full_monomer	0.198345	0.421096	0.852558	0.852301	0.0332334	0.0340001	0.419656	706.494
MA0687.1 SPIC	0.19002	0.424367	0.85258	0.852334	0.0332144	0.0339815	0.422983	706.495
AJ_FLI1::BHLHA15	0.188547	0.424922	0.803478	0.803257	0.0314611	0.030835	0.426699	705.545
MA0819.1 CLOCK	0.181419	0.42775	0.863869	0.863608	0.0370706	0.037785	0.426696	706.408
NR1H4_HUMAN.H10MO.C	0.177394	0.429319	0.81931	0.819067	0.0365154	0.0360559	0.430488	705.704
TA0687_AR_full_dimer	0.177075	0.429449	0.77822	0.777958	0.0390704	0.0388714	0.430099	705.867
NGN2_HUMAN.H10MO.D	0.175527	0.430041	0.862282	0.862074	0.0323119	0.0311333	0.432835	705.19
MA0597.1 THAP1	0.174948	0.430319	0.947644	0.947488	0.0221465	0.023405	0.426747	707.268
THB_HUMAN.H10MO.S	0.169913	0.432291	0.902147	0.901922	0.0337744	0.034727	0.43071	706.61
TA0154_SPIB_DBD_monomer	0.16985	0.432322	0.821184	0.820935	0.036889	0.0384022	0.429895	706.903
TA0347_CLOCK_DBD_dimer	0.165614	0.433984	0.86383	0.863592	0.0370733	0.0377897	0.433015	706.41
TA0156_Spic_DBD_monomer	0.16482	0.434341	0.81796	0.817723	0.0336993	0.0378914	0.426648	708.895
AJ_HOXB2::ELK1_002	0.159198	0.436452	0.778008	0.777806	0.0370683	0.0333387	0.443	703.875
AJ_MGA::DLX2_001	0.158189	0.436915	0.826328	0.826094	0.0383192	0.0388171	0.43638	706.268
AJ_GCM1::PITX1_002	0.156763	0.437478	0.811684	0.81152	0.0271153	0.0273928	0.437116	706.206
TA0112_ELF1_full_monomer	0.153667	0.438669	0.815785	0.815557	0.0413478	0.0389712	0.442389	704.749
AJ_HOXD12::EOMES_001	0.15023	0.440057	0.712341	0.712203	0.0243212	0.0242168	0.440563	705.885
TA0777_ZNF435_full_dimer	0.150111	0.440122	0.729012	0.728808	0.0345389	0.0358085	0.43822	706.805
TA0413_MAFF_DBD_dimer	0.149286	0.440404	0.781148	0.780938	0.0391786	0.0369175	0.444034	704.744
TA0076_ZNF306_full_monomer	0.1491	0.440484	0.783651	0.783425	0.0417335	0.0398433	0.443383	705.004
MA0088.1 znf143	0.148842	0.440665	0.850486	0.850328	0.0242125	0.0278752	0.432146	709.571
MA0007.3 Ar	0.14627	0.441625	0.77821	0.777994	0.0390717	0.0388423	0.442208	705.85
TA0762_VDR_full_dimer	0.146073	0.441686	0.778422	0.778229	0.036054	0.0346028	0.444238	705.11
AJ_GCM2::FOXI1_002	0.144742	0.442265	0.838739	0.83857	0.0284311	0.0307176	0.437963	707.825
AJ_PBX4::HOXA10_001	0.144453	0.442326	0.887318	0.887108	0.0400394	0.0382233	0.44514	705.003
TA0218_NFATC1_full_dimer	0.142568	0.443121	0.765383	0.765142	0.0417211	0.0444927	0.43966	707.493
MA0693.1 Vdr	0.142415	0.443137	0.778504	0.778316	0.0359986	0.0345749	0.445587	705.125
TA0149_SPDEF_DBD_monomer	0.136183	0.445583	0.807131	0.806955	0.0374305	0.0340595	0.450635	704.085
AJ_HOXB13::TBX3_002	0.131414	0.447484	0.818733	0.818584	0.0323956	0.0298645	0.451743	704.325
MA0620.1 Mitf	0.129597	0.448204	0.897908	0.897723	0.0407865	0.0374738	0.452564	704.263
MA0090.1 TEAD1	0.129116	0.448446	0.864551	0.86436	0.0374749	0.0388267	0.446839	706.789
MA0461.2 Atoh1	0.128746	0.448551	0.887704	0.887515	0.0413294	0.0386588	0.45204	704.602
HOMEO0116_Nkx2-5_3436.1	0.127875	0.448911	0.829974	0.829807	0.0354596	0.0342036	0.450907	705.213
TA0339_Atoh1_DBD_dimer	0.125288	0.449925	0.887676	0.887492	0.041365	0.0386747	0.453342	704.593
TA0854_E2F1_DBD_monomer	0.125421	0.449933	0.795693	0.795534	0.0303742	0.0333234	0.445377	708.225
AJ_ETV5::EVX1_003	0.124832	0.450142	0.808405	0.808262	0.029481	0.0301005	0.449324	706.448
AJ_HOXB2::TBX21_003	0.119519	0.45227	0.848817	0.848675	0.0291464	0.0312131	0.449149	707.599
TA0632_NKX2-8_DBD_monomer	0.117578	0.45302	0.954532	0.954413	0.0262992	0.0264298	0.45299	706.089
BU0037 Isgf3g_primary	0.116378	0.453496	0.819283	0.819112	0.0385168	0.0385906	0.453606	706.022
MA0829.1 Srebf1.var.2	0.10974	0.456115	0.835879	0.835691	0.0478313	0.0450323	0.458831	704.728
BU0033 Irf3_primary	0.108831	0.456485	0.866724	0.866585	0.0350621	0.0337012	0.458333	705.141
MA0498.1 Meis1	0.105706	0.457744	0.865904	0.865754	0.0371729	0.0373335	0.457744	706.075
AJ_TEAD4::DLX3_004	0.105186	0.457924	0.833879	0.833743	0.0364171	0.0338148	0.461066	704.461
TA0210_MYBL1_DBD_dimer	0.101371	0.459481	0.798162	0.798053	0.0273541	0.0283677	0.458176	706.812
TA0373_Srebf1_DBD_dimer	0.0987484	0.460495	0.835742	0.835573	0.0478578	0.0450479	0.46295	704.724
AJ_ETV2::BHLHA15	0.0859446	0.465609	0.783177	0.783072	0.0335695	0.0321274	0.467212	705.053
TA0478_Foxk1_DBD_multimer	0.084338	0.466233	0.790303	0.790169	0.0459236	0.0415736	0.469534	703.992
SMAD2_HUMAN.H10MO.C	0.0841982	0.466324	0.867337	0.867224	0.0342566	0.0350951	0.465655	706.526
MA0037.1 GATA3	0.0816073	0.467344	0.987168	0.98711	0.0193296	0.0187445	0.468458	705.322
AJ_TEAD4::DLX2_006	0.0803771	0.467825	0.856153	0.856047	0.0370737	0.0346919	0.470002	704.609
MA0673.1 NKX2-8	0.0654341	0.473809	0.941929	0.941859	0.028511	0.0281298	0.474266	705.687
TA0633_NKX2-8_full_monomer	0.0603526	0.47584	0.941916	0.941852	0.0285203	0.0281367	0.476264	705.685
TA0058_SNAI2_DBD_monomer	0.0568109	0.477255	0.952198	0.952121	0.0367336	0.0360113	0.477794	705.55
MA0745.1 SNAI2	0.0538796	0.478428	0.952251	0.952177	0.0367035	0.0359795	0.47894	705.549
NFAC1_HUMAN.H10MO.A	0.0504396	0.479808	0.864275	0.8642	0.0388555	0.0389985	0.47982	706.061
MA0616.1 Hes2	0.0478758	0.480841	0.856592	0.856534	0.0302311	0.0319534	0.479845	707.272
AJ_TEAD4::FLI1	0.0454831	0.481799	0.850114	0.850062	0.0282889	0.0303113	0.480593	707.613
STAT2_HUMAN.H10MO.B	0.0419013	0.483212	0.869352	0.869299	0.0357452	0.0329778	0.484568	704.34
TA0137_ETV6_full_dimer	0.0369969	0.485198	0.78752	0.787462	0.0367039	0.0415068	0.483352	709.056
HOMEO0043_Hmx1_3423.1	0.0356435	0.48572	0.814752	0.814702	0.0390308	0.0365829	0.486666	704.641
TA0191_SMAD3_DBD_dimer	0.0328398	0.486852	0.818389	0.818333	0.0438641	0.0446845	0.486665	706.396
MA0795.1 SMAD3	0.0328398	0.486852	0.818389	0.818333	0.0438641	0.0446845	0.486665	706.396
PTF1A_HUMAN.H10MO.C	0.0313812	0.487443	0.863582	0.863552	0.0230271	0.0257409	0.486038	708.733
AJ_TEAD4::EOMES_003	0.0313616	0.487445	0.809946	0.809912	0.0270864	0.0280449	0.48706	706.773
NOBOX_HUMAN.H10MO.C	0.0243209	0.490259	0.920264	0.920224	0.0441062	0.0432468	0.490488	705.554
BU0053 Rara_primary	0.0169066	0.493227	0.840941	0.840916	0.038902	0.0375323	0.493492	705.217
NR1I3_HUMAN.H10MO.S	0.0167562	0.493288	0.970702	0.970685	0.0276112	0.0267486	0.493523	705.302
ATF6A_HUMAN.H10MO.B	0.0105806	0.495764	0.835425	0.835409	0.038206	0.0401949	0.495564	707.157
AJ_TEAD4::PITX1_004	0.00648313	0.497404	0.815732	0.815724	0.0313053	0.0314402	0.497404	706.075
TA0217_NFATC1_full_dimer	0.00608228	0.497564	0.771204	0.771194	0.0413533	0.0409266	0.497599	705.753
MA0080.4 SPI1	0.00601706	0.497591	0.794305	0.794296	0.0388107	0.0400089	0.497528	706.671
AJ_FOXO1::ELK3_002	0.00572766	0.497707	0.839344	0.839336	0.0345893	0.0376455	0.497517	708.015
AJ_ERF::DLX3_002	-0.0136039	0.505447	0.818336	0.818351	0.0271521	0.0279755	0.505587	706.658
HINFP_HUMAN.H10MO.C	-0.0242723	0.509713	0.800468	0.8005	0.0312714	0.0349114	0.510787	708.697
ETS0001 h-EHF	-0.0323396	0.512946	0.925153	0.925185	0.0247317	0.0258166	0.513451	706.968
TA0153_SPI1_full_monomer	-0.0337478	0.513511	0.794441	0.794492	0.0387784	0.0399841	0.513868	706.676
TA0364_NEUROG2_DBD_dimer	-0.036592	0.51466	0.863045	0.863103	0.0451859	0.042204	0.513642	704.573
ETS0006 h-ELF5	-0.0367661	0.514719	0.937685	0.93772	0.0245459	0.0251119	0.514992	706.494
AJ_TFAP4::MAX_002	-0.0407639	0.516322	0.77948	0.779539	0.0379815	0.0378713	0.516206	705.916
TA0143_FLI1_DBD_monomer	-0.0436501	0.517472	0.78794	0.788004	0.0369069	0.0380929	0.517952	706.699
BU0104 Zscan4_primary	-0.0489005	0.519582	0.809078	0.809166	0.048646	0.0472812	0.518956	705.37
AJ_ETV7_002	-0.0500611	0.520036	0.788337	0.788407	0.0354693	0.0368061	0.520696	706.826
TA0103_E2F2_DBD_dimer	-0.0510972	0.520471	0.733838	0.733905	0.0375399	0.0345083	0.51875	704.272
HES5_HUMAN.H10MO.D	-0.0563233	0.522531	0.787005	0.787104	0.0425311	0.0465685	0.524544	708.173
ESR1_HUMAN.H10MO.A	-0.0630046	0.525216	0.835576	0.835657	0.0332333	0.0334318	0.525257	706.111
TA0050_Hic1_DBD_dimer	-0.0670101	0.526809	0.913255	0.913344	0.0332523	0.0348198	0.52794	707.043
AJ_HOXD12::FIGLA	-0.0699261	0.527963	0.816685	0.816776	0.0307944	0.0341055	0.530805	708.479
MA0592.1 ESRRA	-0.0713906	0.528563	0.874872	0.87499	0.0424127	0.0433779	0.529082	706.487
TA0729_RARA_full_dimer	-0.077643	0.531055	0.756478	0.756591	0.0367875	0.0384753	0.532327	707.014
MA0739.1 Hic1	-0.0791201	0.531644	0.913124	0.913229	0.0333071	0.0348632	0.532966	707.034
AJ_ETV2::DLX2_001	-0.0801977	0.532086	0.773319	0.773413	0.0308708	0.0307416	0.531817	705.887
MA0157.1 FOXO3	-0.0806499	0.532256	0.938491	0.938601	0.0346856	0.0360625	0.533381	706.872
NR4A2_HUMAN.H10MO.C	-0.0816904	0.532692	0.911179	0.911295	0.0387947	0.0372693	0.531285	705.13
AJ_E2F3::ONECUT2_002	-0.0841915	0.53368	0.751422	0.751521	0.0311779	0.0311041	0.533458	705.927
TA0721_Nr2e1_DBD_dimer	-0.0858417	0.534331	0.805793	0.805911	0.0350896	0.0360459	0.535106	706.588
AJ_MYBL1::EOMES_002	-0.09074	0.536285	0.837905	0.838037	0.0373594	0.0383327	0.537061	706.561
ESR2_HUMAN.H10MO.A	-0.0989453	0.539527	0.815258	0.81538	0.0280719	0.0321921	0.545057	709.457
AJ_RFX3::SRF	-0.106783	0.542682	0.782732	0.782836	0.0255075	0.0258116	0.543001	706.244
NKX25_HUMAN.H10MO.C	-0.10748	0.542953	0.959014	0.959151	0.0324756	0.0334745	0.54407	706.668
AJ_ETV2::ONECUT2_004	-0.107508	0.542959	0.769215	0.769342	0.0295033	0.0309637	0.544867	707.098
ESR1_HUMAN.H10MO.S	-0.109881	0.543907	0.798927	0.799073	0.0337042	0.0349601	0.54533	706.816
AJ_HOXB2::EOMES_001	-0.116134	0.54642	0.869082	0.869227	0.0339918	0.0329115	0.54477	705.29
TA0178_IRF4_full_dimer	-0.125958	0.550301	0.752261	0.752445	0.0370772	0.0382589	0.551662	706.693
MA0122.1 Nkx3-2	-0.128937	0.551484	0.942684	0.942798	0.0225308	0.0232976	0.552985	706.743
AJ_GCM1::SPDEF_003	-0.130888	0.552225	0.754817	0.754979	0.0285116	0.0324995	0.559158	709.282
AJ_GCM1::HOXB13_003	-0.135396	0.554081	0.789246	0.789418	0.0349674	0.0333646	0.551415	704.992
AJ_MYBL1::FIGLA_004	-0.144055	0.557474	0.78975	0.789926	0.0306989	0.0322509	0.560078	707.122
TA0049_Hic1_DBD_dimer	-0.148924	0.55947	0.768928	0.769134	0.0398154	0.0363255	0.554096	704.133
AJ_GCM2::DRGX_002	-0.149034	0.559477	0.802054	0.802221	0.0301899	0.0295873	0.55806	705.544
MA0686.1 SPDEF	-0.15156	0.560438	0.843065	0.843288	0.0361134	0.0386768	0.564381	707.601
TA0216_NFATC1_full_dimer	-0.154445	0.561581	0.776357	0.776584	0.0363241	0.0386651	0.565204	707.447
NFYA_HUMAN.H10MO.A	-0.163973	0.56537	0.859895	0.86019	0.0466013	0.0473162	0.566074	706.32
HU0016_ZNF669	-0.166456	0.566326	0.69927	0.699474	0.0300869	0.0321418	0.570472	707.537
TA0150_SPDEF_full_monomer	-0.16666	0.566406	0.84291	0.843156	0.0361819	0.038745	0.570721	707.597
PRD14_HUMAN.H10MO.C	-0.16968	0.567634	0.84333	0.843536	0.0322077	0.0320146	0.566951	705.848
HMX3_HUMAN.H10MO.D	-0.170167	0.567825	0.874993	0.875303	0.0478672	0.0477548	0.567382	705.928
ZSC16_HUMAN.H10MO.D	-0.175915	0.570103	0.777331	0.777531	0.0305494	0.029859	0.568257	705.487
ISL2_HUMAN.H10MO.D	-0.176109	0.570215	0.899577	0.899829	0.0407897	0.0376341	0.564595	704.341
ETV5_HUMAN.H10MO.D	-0.177342	0.570633	0.887325	0.887497	0.024597	0.0255694	0.573062	706.868
TA0746_Rara_DBD_dimer	-0.185377	0.573817	0.760786	0.761043	0.0363372	0.036474	0.573776	706.063
AJ_HOXB2::ELF1_004	-0.194319	0.577327	0.829277	0.829506	0.0305271	0.0309723	0.5781	706.303
HNF4A_HUMAN.H10MO.A	-0.198482	0.578949	0.846186	0.846453	0.0341515	0.035424	0.581481	706.816
MA0099.1 JUN::FOS	-0.204067	0.581227	0.932438	0.932726	0.0406249	0.0369598	0.573724	704.082
HU0015_ZNF273	-0.205857	0.581839	0.881946	0.88238	0.0531286	0.0554173	0.584923	706.95
MA0648.1 GSC	-0.209961	0.583489	0.89936	0.899692	0.042613	0.041551	0.58111	705.437
AJ_HOXB2::ETV4	-0.210377	0.583597	0.826559	0.826874	0.0368432	0.0392744	0.588603	707.483
AJ_GCM1::ONECUT2_002	-0.213564	0.584897	0.761087	0.761352	0.0333391	0.0326796	0.582904	705.548
AJ_FLI1::CEBPB	-0.213794	0.585173	0.759452	0.759716	0.0410436	0.0323279	0.567095	701.801
AJ_ELK1::PAX9	-0.21483	0.585325	0.736287	0.736535	0.0278435	0.0304611	0.592743	708.151
HOMEO0166_Six4_2860.1	-0.215198	0.585555	0.826359	0.82667	0.0398008	0.0379667	0.581353	704.987
TA0418_MAFK_full_dimer	-0.217101	0.586296	0.81129	0.811574	0.0358696	0.0344236	0.582544	705.109
MA0158.1 HOXA5	-0.218903	0.58698	0.966169	0.96636	0.0232554	0.0229753	0.585595	705.716
MA0485.1 Hoxc9	-0.222067	0.588264	0.843105	0.843418	0.039943	0.037037	0.581635	704.435
TA0537_GSC_full_monomer	-0.222419	0.588363	0.899346	0.899698	0.0426288	0.0415723	0.585861	705.44
TF7L2_HUMAN.H10MO.A	-0.234248	0.593027	0.882529	0.882834	0.0372379	0.0341977	0.585245	704.254
TA0526_EN2_full_monomer	-0.239304	0.594927	0.914294	0.914577	0.0309734	0.0310608	0.594788	706.042
MA0131.1 HINFP	-0.240175	0.595209	0.840624	0.840974	0.0350944	0.0383186	0.603254	708.099
MA0642.1 EN2	-0.241774	0.595888	0.914312	0.914597	0.030971	0.0310434	0.595703	706.031
MA0664.1 MLXIPL	-0.24504	0.597175	0.846942	0.847344	0.0440265	0.0431312	0.594852	705.536
CTCFL_HUMAN.H10MO.A	-0.246758	0.597805	0.805105	0.805507	0.0415533	0.042814	0.600264	706.659
TA0358_MLXIPL_full_dimer	-0.24855	0.598539	0.846833	0.847242	0.0440601	0.0431599	0.596175	705.534
AJ_GCM2::TEF	-0.255609	0.601271	0.766995	0.76728	0.0296351	0.0292609	0.599609	705.703
IRF1_HUMAN.H10MO.A	-0.257795	0.602076	0.80163	0.801978	0.0339566	0.0354289	0.605917	706.956
TA0356_MAX_DBD_dimer	-0.258346	0.602289	0.878609	0.879077	0.0455464	0.047601	0.606309	706.997
MA0058.3 MAX	-0.262322	0.603827	0.878896	0.87937	0.04546	0.0475019	0.607886	706.992
AJ_TEAD4::ELF1_001	-0.262882	0.604087	0.785991	0.786351	0.0364155	0.0359735	0.60243	705.713
AJ_HOXD12::ELK1_002	-0.266645	0.605462	0.778575	0.778938	0.032561	0.0357991	0.615092	708.282
TA0183_IRF8_DBD_dimer	-0.273721	0.608301	0.797503	0.797898	0.0396095	0.0379018	0.60334	705.05
AJ_TEAD4::GSC2	-0.280707	0.610984	0.808441	0.808788	0.0335941	0.032491	0.607007	705.268
TA0317_TEAD1_full_monomer	-0.284215	0.612241	0.926322	0.926669	0.0296238	0.0321023	0.620764	707.902
MA0090.2 TEAD1	-0.284215	0.612241	0.926322	0.926669	0.0296238	0.0321023	0.620764	707.902
MA0113.3 NR3C1	-0.290798	0.614816	0.784212	0.784657	0.039452	0.0402954	0.616691	706.456
AJ_HOXB2::TBX21_001	-0.29204	0.615282	0.831873	0.832264	0.034085	0.0352271	0.618504	706.731
AJ_HOXB2::ELK3_002	-0.29306	0.615716	0.797931	0.798308	0.034322	0.0337558	0.613399	705.619
AJ_TEAD4::ELF1_002	-0.297124	0.617193	0.785855	0.78626	0.033093	0.035892	0.626168	707.924
TA0856_YY2_full_dimer	-0.299567	0.61817	0.800433	0.800902	0.0399875	0.0411484	0.620961	706.629
TA0736_RORA_DBD_dimer	-0.309782	0.622102	0.720547	0.720987	0.037451	0.0373197	0.621184	705.902
NFAC2_HUMAN.H10MO.B	-0.313378	0.623426	0.931499	0.931915	0.033181	0.0348828	0.628947	707.139
TA0181_IRF7_DBD_dimer	-0.313281	0.623455	0.820355	0.820805	0.0385888	0.0377259	0.620298	705.492
MA0772.1 IRF7	-0.313281	0.623455	0.820355	0.820805	0.0385888	0.0377259	0.620298	705.492
AJ_TEAD4::CLOCK_003	-0.315151	0.624171	0.824088	0.824442	0.0302717	0.0294946	0.620603	705.421
AJ_HOXB2::PITX1_004	-0.315303	0.624191	0.810393	0.810844	0.0370632	0.037591	0.625364	706.296
HOMEO0091_Isx_3445.1	-0.317794	0.625125	0.839436	0.839916	0.0385189	0.039706	0.628281	706.669
ZFX_HUMAN.H10MO.C	-0.318712	0.625413	0.844495	0.845102	0.0451244	0.0500583	0.637897	708.524
TA0715_NR3C1_DBD_dimer	-0.324378	0.627637	0.784103	0.784601	0.0395184	0.0403335	0.629615	706.439
AJ_MYCL2	-0.327217	0.628686	0.870712	0.871321	0.04643	0.0488975	0.634649	707.183
AJ_ETV5::FOXO1_001	-0.334387	0.631361	0.8624	0.862783	0.0272295	0.0301164	0.643976	708.443
ETS0005 h-ELF4	-0.33459	0.631476	0.904587	0.905063	0.0353893	0.0374271	0.638108	707.286
AJ_ETV2::ONECUT2_001	-0.335597	0.631926	0.776157	0.776565	0.0325206	0.0319944	0.629345	705.626
BU0059 Six6_primary	-0.336957	0.632404	0.810666	0.811155	0.0373788	0.0381536	0.634463	706.441
AJ_GCM1::FOXI1_001	-0.340284	0.633701	0.816447	0.816869	0.033185	0.0325686	0.630783	705.574
HOMEO0160_Rhox11_2205.1	-0.345482	0.635674	0.837977	0.838387	0.0320879	0.0311713	0.631426	705.359
HNF4G_HUMAN.H10MO.C	-0.353915	0.638895	0.869914	0.870392	0.0379816	0.0354915	0.629653	704.582
TA0778_ZNF713_full_monomer	-0.358134	0.640348	0.735925	0.736426	0.0347424	0.0367575	0.64744	707.296
AJ_FLI1::DLX2_003	-0.360853	0.641423	0.742519	0.742985	0.0338646	0.033918	0.641051	706.014
TA0521_EN1_DBD_monomer	-0.364731	0.642869	0.905709	0.906269	0.0399787	0.040342	0.643506	706.181
GFI1_HUMAN.H10MO.C	-0.372204	0.645744	0.89926	0.899817	0.0417795	0.0392881	0.636908	704.705
AJ_CEBPG::CREB3L1	-0.378541	0.647957	0.815164	0.815683	0.0332729	0.0360168	0.65876	707.874
PAX8_HUMAN.H10MO.D	-0.382981	0.649749	0.900371	0.900711	0.0245445	0.0233436	0.642213	704.928
AJ_ETV2::GSC2_003	-0.384544	0.650184	0.776666	0.77709	0.0266344	0.0290062	0.662047	708.031
TA0362_Mlx_DBD_dimer	-0.387701	0.651446	0.812215	0.81295	0.0498568	0.0497836	0.650616	705.947
PRGR_HUMAN.H10MO.S	-0.392152	0.653104	0.981075	0.981374	0.0202213	0.0200797	0.651469	705.826
AJ_TEAD4::HES7_003	-0.393486	0.653593	0.801907	0.80237	0.031043	0.0309554	0.652557	705.917
MA0808.1 TEAD3	-0.402298	0.656817	0.934449	0.935095	0.0410468	0.0422133	0.660335	706.615
TA0320_TEAD3_DBD_monomer	-0.409728	0.659555	0.934394	0.935053	0.041078	0.0422399	0.663108	706.612
TA0416_MAFK_DBD_dimer	-0.411732	0.66032	0.765019	0.765535	0.0328296	0.0329524	0.660225	706.062
AJ_SOX17	-0.416328	0.661988	0.87129	0.87182	0.0327976	0.033506	0.664582	706.461
MA0727.1 NR3C2	-0.421236	0.663789	0.779842	0.780487	0.0394938	0.0402678	0.666104	706.416
NR2C1_HUMAN.H10MO.C	-0.421852	0.664017	0.872843	0.873449	0.037089	0.0377567	0.666092	706.38
AJ_GCM2::MAX	-0.426486	0.665657	0.807379	0.807857	0.0275529	0.0294504	0.675513	707.551
TA0716_NR3C2_DBD_dimer	-0.435108	0.668854	0.780014	0.78068	0.0394841	0.0402563	0.671224	706.415
AJ_HOXB13::TBX21_003	-0.439998	0.670669	0.819821	0.820349	0.0318907	0.0315709	0.66839	705.76
AJ_HOXB2::ELF1_003	-0.442908	0.671762	0.821607	0.822118	0.0314794	0.0303069	0.665123	705.174
MA0604.1 Atf1	-0.45076	0.674539	0.880453	0.881276	0.047303	0.0479668	0.676089	706.291
MA0663.1 MLX	-0.453525	0.675549	0.819961	0.820757	0.0458803	0.0461229	0.675694	706.096
AJ_ERF::HOXB13	-0.454564	0.675874	0.835333	0.835891	0.0308292	0.0322766	0.682735	707.039
AJ_HOXB2::SPDEF	-0.454609	0.675938	0.769754	0.770262	0.0291313	0.029338	0.676376	706.136
TA0719_NR4A2_full_monomer	-0.463931	0.679447	0.841296	0.842054	0.0473364	0.0428505	0.662921	703.991
TA0359_MLX_full_dimer	-0.472843	0.682492	0.820102	0.820931	0.045839	0.0460813	0.682641	706.096
TA0782_E2F2_DBD_dimer	-0.483375	0.686165	0.734014	0.734687	0.033956	0.0366068	0.69856	707.769
MA0864.1 E2F2	-0.485536	0.686933	0.734055	0.734731	0.033954	0.0366051	0.699372	707.769
AJ_HOXD12::ETV1_002	-0.486559	0.687302	0.754525	0.755168	0.032379	0.0347576	0.698986	707.659
TA0234_PAX9_DBD_monomer	-0.492999	0.689596	0.75723	0.757842	0.0306362	0.032637	0.700014	707.467
MA0781.1 PAX9	-0.492999	0.689596	0.75723	0.757842	0.0306362	0.032637	0.700014	707.467
AJ_PBX4::HOXA1	-0.49547	0.690617	0.870494	0.87124	0.0413886	0.0395536	0.682119	705.024
AJ_ETV5::HOXA2_002	-0.497352	0.691108	0.770834	0.771417	0.0282602	0.0308376	0.705995	708.083
AJ_ETV2::GSC2_001	-0.508834	0.695288	0.748063	0.748639	0.030225	0.0297382	0.691654	705.627
HES7_HUMAN.H10MO.D	-0.517144	0.698059	0.761988	0.762936	0.0438553	0.0481957	0.714718	708.271
THB_HUMAN.H10MO.C	-0.517668	0.698247	0.850334	0.8509	0.0262768	0.0287506	0.714079	708.154
TA0735_RARG_full_dimer	-0.518035	0.698341	0.792425	0.793084	0.0296346	0.0334378	0.720098	708.993
GATA6_HUMAN.H10MO.B	-0.519073	0.698794	0.862296	0.863054	0.0366851	0.0383813	0.706243	707.023
AJ_ETV5::EOMES_002	-0.519467	0.698876	0.871664	0.872309	0.0298335	0.0326569	0.714832	708.166
AJ_ERF::DLX2_002	-0.526949	0.70167	0.819052	0.819662	0.0318212	0.0304441	0.692964	705.046
AJ_GCM1::ELF1_003	-0.539976	0.706168	0.798346	0.799036	0.0345536	0.0335556	0.699994	705.352
AJ_FOXO1::ELF1_003	-0.545863	0.708025	0.848001	0.84873	0.0318705	0.0351591	0.726071	708.373
NFAC1_HUMAN.H10MO.S	-0.549866	0.709487	0.834368	0.835208	0.0388477	0.0401724	0.715	706.744
TA0212_MYBL2_DBD_dimer	-0.55343	0.710777	0.743645	0.744321	0.0324809	0.032086	0.707657	705.713
BU0081 Tcf1_primary	-0.572458	0.717183	0.810525	0.811373	0.0370362	0.0389256	0.726048	707.133
AJ_ETV5::EVX1_001	-0.573639	0.717548	0.9023	0.902969	0.0284187	0.0306816	0.731801	707.806
AJ_TEAD4::ETV7	-0.577611	0.718953	0.74279	0.743426	0.0280469	0.028979	0.724485	706.724
MA0098.2 Ets1	-0.581829	0.720377	0.873381	0.874129	0.0326243	0.0337762	0.726332	706.772
PLAL1_HUMAN.H10MO.D	-0.584998	0.721424	0.889355	0.890201	0.03615	0.0379906	0.730395	707.131
TA0755_Rxra_DBD_dimer	-0.589804	0.723192	0.803321	0.804196	0.0408652	0.0389716	0.713156	704.982
VSX2_HUMAN.H10MO.D	-0.591051	0.723474	0.842987	0.844022	0.0442065	0.04602	0.730595	706.903
TA0170_HSF1_DBD_trimer	-0.594174	0.724595	0.827776	0.828744	0.0431477	0.0427811	0.722043	705.793
TA0756_Rxra_DBD_dimer	-0.60621	0.728569	0.783284	0.78429	0.0426842	0.0436008	0.731949	706.458
TA0453_FOXK1_DBD_multimer	-0.60845	0.729487	0.799894	0.800911	0.0476461	0.0439025	0.712636	704.316
PRGR_HUMAN.H10MO.C	-0.611468	0.730382	0.90279	0.903437	0.02838	0.0277973	0.725353	705.531
HOMEO0023_Dlx4_3488.2	-0.61456	0.731329	0.806986	0.807955	0.0402717	0.0414611	0.736342	706.64
HOMEO0011_Cart1_1275.1	-0.615211	0.731614	0.813461	0.8146	0.0494127	0.0486506	0.727602	705.642
GCM1_HUMAN.H10MO.D	-0.618739	0.732846	0.888153	0.88891	0.0339251	0.0321426	0.721211	704.852
HOMEO0041_Hlxb9_3422.1	-0.621512	0.733744	0.819844	0.82076	0.0404571	0.0387206	0.724064	705.054
MA0473.1 ELF1	-0.628007	0.735738	0.878466	0.879347	0.0352577	0.0368825	0.744137	707.019
AJ_BACH1	-0.629192	0.736239	0.858424	0.859547	0.0481104	0.0468799	0.730078	705.423
DDIT3_HUMAN.H10MO.C	-0.631167	0.736926	0.860759	0.861515	0.0330391	0.0314725	0.726215	704.959
MA0523.1 TCF7L2	-0.633126	0.737675	0.874664	0.875521	0.0395056	0.0355505	0.715803	703.884
HOMEO0015_Crx_3485.1	-0.635516	0.738353	0.79613	0.796977	0.0368593	0.0350339	0.727155	704.915
MA0036.1 GATA2	-0.641748	0.740339	0.997257	0.997428	0.00717592	0.00700814	0.734561	705.47
AJ_ERF::EOMES_001	-0.653561	0.744026	0.774394	0.775092	0.0262462	0.0280582	0.757282	707.555
TA0680_VENTX_DBD_monomer	-0.655464	0.744727	0.890201	0.89127	0.0424638	0.0428756	0.745817	706.194
TA0113_ELF3_DBD_monomer	-0.658138	0.745572	0.818006	0.819041	0.0405244	0.0413401	0.748836	706.428
AJ_HOXB2::ELF1_002	-0.66037	0.74641	0.793668	0.794419	0.0313806	0.0298444	0.735071	704.927
TA0731_RARG_DBD_dimer	-0.662	0.746854	0.761312	0.762254	0.0375565	0.0373951	0.745008	705.885
MA0724.1 VENTX	-0.663658	0.747363	0.890177	0.89126	0.0424719	0.0428727	0.748405	706.188
MA0643.1 Esrrg	-0.669445	0.749204	0.882048	0.88317	0.0433116	0.044047	0.751837	706.357
TA0474_Foxj3_DBD_multimer	-0.669549	0.74921	0.797397	0.798439	0.0395315	0.0408976	0.755518	706.755
TA0696_ESRRG_full_monomer	-0.677043	0.751625	0.882323	0.883455	0.0431841	0.0439359	0.754364	706.367
MA0007.1 Ar	-0.680235	0.752592	0.81845	0.819163	0.026313	0.0275586	0.761626	707.048
TA0686_AR_DBD_dimer	-0.680104	0.752689	0.782968	0.783929	0.038477	0.0370989	0.744019	705.204
TA0532_GBX1_DBD_monomer	-0.681476	0.753061	0.885187	0.886425	0.047761	0.0477333	0.75198	705.967
MA0668.1 NEUROD2	-0.681885	0.753306	0.721183	0.721925	0.0304627	0.0285546	0.738751	704.642
MA0058.1 MAX	-0.685875	0.754432	0.889535	0.89071	0.0444455	0.0449964	0.756121	706.254
AJ_TEAD4::SPDEF_002	-0.686575	0.754594	0.742247	0.74297	0.0263684	0.0277035	0.764359	707.124
AJ_CLOCK::EVX1_002	-0.687303	0.755067	0.741474	0.742382	0.0379007	0.0346909	0.73554	704.193
FLI1_HUMAN.H10MO.A	-0.694765	0.757156	0.894022	0.894972	0.0338207	0.0359363	0.769476	707.402
MA0889.1 GBX1	-0.695336	0.757433	0.885248	0.886511	0.0477703	0.0477353	0.756306	705.963
AJ_TEAD4::PAX5	-0.706846	0.760979	0.745611	0.746256	0.0232405	0.0239765	0.766841	706.689
ETS0020 h-ETV7	-0.708907	0.761574	0.935598	0.93635	0.0262296	0.0278684	0.773995	707.4
ANDR_HUMAN.H10MO.A	-0.722946	0.765969	0.853378	0.854233	0.0302606	0.0310865	0.770944	706.589
TA0120_ELK1_full_dimer	-0.730378	0.768078	0.728855	0.729972	0.0348187	0.0402078	0.799826	709.66
AJ_ETV2::RFX5_002	-0.730689	0.768296	0.750244	0.751131	0.030145	0.031929	0.78018	707.323
NR1H2_HUMAN.H10MO.D	-0.730764	0.768605	0.723304	0.724358	0.0418438	0.0378968	0.746182	703.999
AJ_ETV2::DRGX_002	-0.732236	0.769158	0.831201	0.832061	0.035648	0.0308201	0.737028	703.199
MA0475.1 FLI1	-0.734202	0.769438	0.900294	0.901296	0.0353142	0.0358691	0.771909	706.329
SOX3_HUMAN.H10MO.D	-0.743623	0.772264	0.839308	0.840562	0.0426432	0.0443536	0.780102	706.882
AJ_MGA::EVX1_001	-0.74704	0.773517	0.841555	0.84266	0.0420407	0.0388207	0.755004	704.357
MA0143.2 Sox2	-0.750693	0.774395	0.816644	0.817611	0.032448	0.0338667	0.783053	706.965
AJ_ETV2::RFX5_003	-0.752182	0.77477	0.769973	0.770851	0.0280632	0.0307116	0.794324	708.16
TA0547_HMX3_DBD_monomer	-0.766828	0.779309	0.899188	0.900193	0.034585	0.0344562	0.777444	705.897
ERR2_HUMAN.H10MO.A	-0.776603	0.782131	0.896869	0.898204	0.0433515	0.0451776	0.790548	706.928
AJ_ELK1::FOXI1_005	-0.781696	0.783664	0.82254	0.823531	0.0325404	0.0332945	0.787872	706.496
TA0116_ELF5_DBD_monomer	-0.782037	0.783732	0.895846	0.896868	0.032921	0.0343482	0.792441	706.956
AJ_ETV2::DRGX_001	-0.782239	0.783806	0.808805	0.809862	0.0343288	0.0355089	0.790521	706.75
AJ_ETV2::ONECUT2_005	-0.785222	0.784603	0.764459	0.765364	0.0278924	0.0303108	0.802803	707.975
AJ_TEAD4::ERG_003	-0.787558	0.785352	0.822165	0.823303	0.0363968	0.0379799	0.794114	706.959
MA0143.1 Sox2	-0.793603	0.787119	0.815909	0.816934	0.0325331	0.0339548	0.795949	706.964
AJ_FLI1::DLX2_001	-0.795126	0.787594	0.846937	0.847854	0.0295732	0.0303085	0.792207	706.534
RARG_HUMAN.H10MO.S	-0.795768	0.787822	0.970215	0.971082	0.0285888	0.0286207	0.787037	706.004
TA0703_HNF4A_full_dimer	-0.796297	0.788023	0.780897	0.78207	0.0396489	0.0386853	0.781362	705.45
MA0671.1 NFIX	-0.797601	0.788325	0.96684	0.967498	0.0213075	0.0216912	0.791392	706.38
HSF2_HUMAN.H10MO.A	-0.797954	0.788491	0.809477	0.810752	0.0426825	0.0419598	0.78354	705.609
AJ_HOXA6	-0.800274	0.789222	0.940937	0.941999	0.0365516	0.0348744	0.777472	704.991
ETS0019 h-ETV6	-0.802104	0.789465	0.919821	0.920692	0.0252535	0.0285626	0.817232	709.061
AJ_ELK1::TBX21_002	-0.810816	0.79208	0.831178	0.832265	0.0333191	0.0352686	0.804269	707.308
TA0859_NFIX_full_monomer	-0.811562	0.79236	0.966823	0.967493	0.0213324	0.0217182	0.795461	706.382
BU0048 Nkx3-1_primary	-0.815705	0.793439	0.82947	0.830619	0.0340603	0.0370577	0.812126	708.006
ELF5_HUMAN.H10MO.D	-0.820959	0.795125	0.919404	0.920336	0.0305287	0.0298342	0.788754	705.484
AJ_MGA::DLX2_002	-0.821344	0.795236	0.795546	0.796672	0.0368819	0.0360226	0.788734	705.472
TA0147_SPDEF_DBD_monomer	-0.823314	0.795606	0.832644	0.833865	0.0357272	0.0389921	0.815074	708.088
AJ_TEAD4::HOXA13_004	-0.830559	0.797934	0.786888	0.78785	0.0324511	0.0304324	0.782078	704.651
MA0462.1 BATF::JUN	-0.832176	0.798316	0.884899	0.886171	0.0412389	0.0401608	0.79111	705.411
TA0535_GBX2_full_monomer	-0.833601	0.79864	0.90437	0.905692	0.0410214	0.0416736	0.80126	706.333
SOX1_HUMAN.H10MO.D	-0.834977	0.798901	0.800878	0.802038	0.033311	0.0365406	0.819644	708.222
AJ_ETV5::FOXO1_002	-0.836218	0.79922	0.871787	0.87281	0.0287628	0.0321987	0.824804	708.773
AJ_HOXD12::ETV4_001	-0.842138	0.800945	0.752447	0.753591	0.033217	0.0357106	0.816936	707.697
TA0350_HES7_DBD_dimer	-0.845869	0.801961	0.76847	0.769979	0.0428909	0.0469086	0.822049	708.143
TA0541_Gbx2_DBD_monomer	-0.851964	0.803899	0.911045	0.912532	0.0479934	0.0458321	0.792092	705.009
MA0136.2 ELF5	-0.852788	0.803967	0.901705	0.902726	0.03021	0.0314531	0.812396	706.905
AJ_GCM1::TBX21_002	-0.853181	0.804205	0.74327	0.744155	0.0280939	0.0272583	0.79608	705.334
MA0692.1 TFEB	-0.85346	0.804299	0.871172	0.872537	0.0436941	0.042038	0.794211	705.16
BU0050 Osr1_primary	-0.853877	0.804385	0.8412	0.842466	0.0398665	0.0389564	0.797911	705.482
TA0117_ELF5_full_monomer	-0.855721	0.80478	0.901865	0.902888	0.0301789	0.0314241	0.81324	706.908
HSF4_HUMAN.H10MO.D	-0.855316	0.804794	0.799738	0.801215	0.0466659	0.0453657	0.797113	705.374
CR3L1_HUMAN.H10MO.D	-0.856063	0.804794	0.795421	0.796938	0.0425586	0.0465955	0.825187	708.171
MA0514.1 Sox3	-0.857872	0.805465	0.932467	0.933508	0.0321888	0.0318854	0.802169	705.773
AJ_ERF::ONECUT2	-0.860743	0.806229	0.76914	0.770082	0.0285846	0.0287591	0.806585	706.114
HEY1_HUMAN.H10MO.D	-0.862278	0.806532	0.83151	0.832904	0.0393856	0.0424871	0.823417	707.785
SMRC1_HUMAN.H10MO.D	-0.861394	0.806626	0.896263	0.897423	0.0390855	0.0353346	0.782163	703.967
HSF1_HUMAN.H10MO.A	-0.862311	0.806731	0.829037	0.830457	0.044646	0.043277	0.798358	705.314
AJ_FOXJ3::ELF1	-0.863601	0.806971	0.803261	0.804695	0.0423045	0.0436402	0.813233	706.687
AJ_TEAD4::ELK3	-0.867134	0.807996	0.768962	0.769951	0.0299454	0.0299685	0.807099	705.996
TA0380_TFEB_full_dimer	-0.867358	0.808133	0.871167	0.872555	0.0437274	0.0420576	0.797928	705.154
AJ_GCM1::HOXB13_004	-0.868846	0.80853	0.804776	0.805794	0.0318199	0.030774	0.799607	705.267
CDC5L_HUMAN.H10MO.D	-0.870907	0.809169	0.872564	0.873493	0.030036	0.0280124	0.791788	704.545
HXB2_HUMAN.H10MO.D	-0.872632	0.809546	0.804366	0.805839	0.0454338	0.044364	0.80286	705.467
TA0168_Tcf7_DBD_monomer	-0.873594	0.81017	0.826412	0.827756	0.0484309	0.0403747	0.767303	702.621
MA0769.1 Tcf7	-0.873594	0.81017	0.826412	0.827756	0.0484309	0.0403747	0.767303	702.621
AJ_ETV7_001	-0.876386	0.810446	0.894275	0.895423	0.0329695	0.0344477	0.819762	706.99
HMGA1_HUMAN.H10MO.D	-0.879628	0.811282	0.977397	0.978197	0.0222806	0.0238984	0.826861	707.639
BU0058 Sfpi1_primary	-0.88109	0.811785	0.904673	0.905736	0.0314697	0.0317304	0.812653	706.163
MAFF_HUMAN.H10MO.A	-0.881893	0.812005	0.762479	0.763615	0.0336141	0.0338449	0.81254	706.131
AJ_TEAD4::HOXB13_006	-0.88591	0.812995	0.857596	0.858677	0.0301707	0.0320914	0.826589	707.428
MA0114.3 Hnf4a	-0.8876	0.813655	0.770614	0.771893	0.0397704	0.0378439	0.800874	704.938
MA0822.1 HES7	-0.888932	0.813764	0.768418	0.770004	0.0428937	0.0469154	0.834039	708.145
TA0705_Hnf4a_DBD_dimer	-0.895333	0.815729	0.770614	0.771904	0.0397535	0.0378505	0.80306	704.95
AJ_ERF::FOXI1_003	-0.901061	0.817001	0.815904	0.817077	0.031157	0.0342182	0.838289	708.253
AJ_ALX4::TBX21_001	-0.905188	0.818152	0.776039	0.77699	0.0260187	0.0276176	0.831288	707.376
AJ_HOXB2::ETV7_002	-0.905765	0.81831	0.825489	0.826343	0.0234074	0.0247723	0.830738	707.303
HU0029_MZF1	-0.907924	0.819009	0.924393	0.926643	0.0660883	0.0651376	0.814472	705.665
ZN143_HUMAN.H10MO.A	-0.915353	0.820703	0.837567	0.838599	0.0256495	0.0296418	0.854201	709.682
AJ_CUX1::TBX21_001	-0.921612	0.82248	0.77184	0.772999	0.0312976	0.0330486	0.834394	707.248
AJ_GCM1::HOXB13_001	-0.922871	0.822679	0.828746	0.829833	0.0269796	0.0309808	0.854661	709.495
TA0139_Elf5_DBD_monomer	-0.923874	0.823085	0.906584	0.907624	0.0282864	0.0296047	0.832873	707.031
MA0125.1 Nobox	-0.924109	0.823271	0.92565	0.927151	0.0436237	0.0426578	0.816838	705.497
AJ_HOXD12::ETV4_002	-0.926576	0.82372	0.736198	0.737429	0.0320303	0.0349339	0.843388	708.07
MA0525.1 TP63	-0.926217	0.823789	0.823529	0.824653	0.0320904	0.031888	0.821178	705.841
SPDEF_HUMAN.H10MO.D	-0.927256	0.823915	0.864188	0.865289	0.0289595	0.0312222	0.840817	707.77
NF2L1_HUMAN.H10MO.C	-0.930158	0.824894	0.974521	0.975435	0.0270598	0.0257897	0.812353	704.969
TA0870_CREB3L1_DBD_dimer	-0.933106	0.82546	0.766206	0.767608	0.0373095	0.039503	0.83803	707.314
AJ_TEAD4::CEBPD_002	-0.93438	0.825779	0.741084	0.742161	0.0284437	0.0303003	0.839813	707.466
TA0697_Esrra_DBD_dimer	-0.938498	0.82692	0.773074	0.774314	0.0341683	0.0347317	0.829727	706.346
TA0761_THRB_DBD_dimer	-0.939692	0.827321	0.741644	0.742916	0.0367403	0.0355504	0.818361	705.277
AJ_FLI1::FOXI1_001	-0.942644	0.828022	0.818253	0.819699	0.040481	0.0403057	0.825878	705.884
AJ_GCM2::TBX21_002	-0.949771	0.829653	0.756234	0.757346	0.0277128	0.0307933	0.853787	708.568
FIGLA_HUMAN.H10MO.D	-0.949571	0.829739	0.9006	0.901944	0.0363633	0.0371967	0.834057	706.49
TA0304_TBX21_DBD_dimer	-0.949566	0.829823	0.752794	0.754158	0.0386087	0.0377538	0.823362	705.497
AJ_GCM1::CEBPB_001	-0.952936	0.830554	0.737461	0.738496	0.0272942	0.0285498	0.840222	707.017
ETS0002 h-ELF1	-0.956418	0.831385	0.896744	0.898111	0.0348772	0.0375849	0.848193	707.758
HOMEO0016_Cutl1_3494.1	-0.960427	0.832558	0.809771	0.810911	0.0316779	0.0311643	0.827533	705.625
AJ_ERF::DLX2_001	-0.961557	0.832833	0.822345	0.823441	0.0302766	0.0299244	0.828919	705.724
TA0753_Rarg_DBD_dimer	-0.964134	0.833516	0.739717	0.741094	0.0386784	0.0375277	0.825175	705.333
ETS0003 h-ELF2	-0.973486	0.83562	0.90864	0.910043	0.0342668	0.0378819	0.858516	708.43
GRHL1_HUMAN.H10MO.D	-0.979366	0.837094	0.795037	0.79649	0.0356712	0.0389948	0.857311	708.131
AJ_CLOCK::EVX1_004	-0.981796	0.837844	0.809235	0.810355	0.0299031	0.0299694	0.837258	706.028
TA0194_MEIS2_DBD_monomer	-0.98255	0.83796	0.926857	0.928445	0.0407918	0.042486	0.846602	706.914
MA0774.1 MEIS2	-0.98255	0.83796	0.926857	0.928445	0.0407918	0.042486	0.846602	706.914
TA0427_XBP1_DBD_dimer	-0.983605	0.838251	0.799517	0.801107	0.0415249	0.0424804	0.842592	706.493
MYBA_HUMAN.H10MO.D	-0.990065	0.839759	0.836441	0.837869	0.035467	0.0379147	0.85463	707.554
AJ_ETV5::HOXA13_001	-0.989703	0.839789	0.816029	0.817115	0.0288457	0.0288378	0.838606	705.973
BMC_TATA_box	-0.990014	0.840085	0.84212	0.843249	0.0332407	0.0299281	0.813872	703.894
MEF2A_HUMAN.H10MO.A	-0.993639	0.840781	0.860082	0.861525	0.0388002	0.0381539	0.835633	705.615
AJ_SOX6	-0.995475	0.84123	0.834407	0.835767	0.0365545	0.0359054	0.835813	705.592
TA0107_E2F3_DBD_dimer	-0.997107	0.841713	0.70538	0.706791	0.0394938	0.0371756	0.826094	704.724
TA0421_Mafb_DBD_dimer	-1.00006	0.842299	0.774751	0.776029	0.0334393	0.0335924	0.842276	706.081
MA0100.1 Myb	-1.00158	0.84255	0.930087	0.931585	0.0366296	0.0393217	0.858405	707.66
MA0594.1 Hoxa9	-1.01051	0.84501	0.865514	0.866934	0.040391	0.0368966	0.822202	704.156
AJ_ERF::CEBPD	-1.01307	0.845849	0.778952	0.780215	0.0392187	0.0326938	0.801352	702.621
AJ_TEAD4::ELK1_003	-1.01771	0.846521	0.796767	0.798212	0.03696	0.0373198	0.847722	706.195
MA0871.1 TFEC	-1.02382	0.848093	0.903156	0.904443	0.0348239	0.033025	0.834244	704.871
HU0008_ZNF382	-1.02677	0.848621	0.746641	0.748011	0.0338917	0.0350745	0.855709	706.762
JUN_HUMAN.H10MO.A	-1.0273	0.848926	0.901329	0.90308	0.0474888	0.0447655	0.833631	704.752
TA0741_RXRA_full_dimer	-1.02817	0.84898	0.775436	0.776984	0.0388737	0.0395573	0.852033	706.371
TA0847_TFEC_DBD_dimer	-1.02836	0.849163	0.903202	0.904495	0.034846	0.0330351	0.835233	704.864
TA0211_MYBL2_DBD_dimer	-1.03452	0.850468	0.776815	0.778188	0.0342743	0.0348679	0.853456	706.365
MA0890.1 GBX2	-1.0483	0.85379	0.902962	0.904977	0.0529495	0.0504861	0.84124	704.978
SOX17_HUMAN.H10MO.D	-1.04861	0.853909	0.81436	0.815734	0.0369232	0.0344234	0.835966	704.538
TA0848_CREB3L1_full_dimer	-1.05443	0.85503	0.761136	0.762744	0.0385121	0.0400806	0.863425	706.896
TA0739_RXRA_DBD_dimer	-1.0549	0.855189	0.773825	0.775417	0.0392135	0.0396571	0.856752	706.23
TA0281_RUNX3_full_monomer	-1.05598	0.855478	0.876611	0.878156	0.0388848	0.0384264	0.851514	705.721
MA0684.1 RUNX3	-1.05598	0.855478	0.876611	0.878156	0.0388848	0.0384264	0.851514	705.721
TA0533_GBX2_DBD_monomer	-1.058	0.856013	0.902822	0.904858	0.0530388	0.0505521	0.843377	704.97
IRX2_HUMAN.H10MO.D	-1.0603	0.856443	0.855015	0.855967	0.023641	0.0236052	0.854955	705.946
HOMEO0167_Six6_2267.4	-1.06035	0.856475	0.792577	0.794064	0.0372942	0.0368375	0.852401	705.711
TA0536_GSC2_DBD_monomer	-1.06148	0.856661	0.908855	0.910399	0.0372263	0.038219	0.861813	706.575
BU0051 Osr2_primary	-1.06187	0.856829	0.837031	0.838588	0.0392102	0.0385388	0.851571	705.605
MA0891.1 GSC2	-1.06244	0.856877	0.908758	0.910303	0.0372021	0.0382069	0.862107	706.583
ZN410_HUMAN.H10MO.D	-1.06289	0.856998	0.754082	0.755928	0.0448938	0.045647	0.859843	706.352
HOMEO0034_Evx2_2645.3	-1.06353	0.857117	0.778504	0.779959	0.034866	0.035952	0.863302	706.677
AJ_ELK1::EOMES_003	-1.0675	0.857915	0.82418	0.82568	0.033751	0.0369615	0.878275	708.178
AJ_TEAD4::DLX2_005	-1.06827	0.858227	0.818325	0.819844	0.0369983	0.0373618	0.859433	706.197
NR4A1_HUMAN.H10MO.C	-1.06888	0.858428	0.924072	0.925678	0.0404547	0.0394734	0.851428	705.451
AJ_PITX1::EOMES_002	-1.08481	0.861824	0.800199	0.801431	0.0279716	0.0298665	0.876192	707.524
MA0625.1 NFATC3	-1.08512	0.862075	0.917098	0.918518	0.035593	0.0343699	0.852595	705.235
PEBB_HUMAN.H10MO.C	-1.08969	0.86291	0.931616	0.932832	0.0276188	0.0293243	0.875944	707.383
AJ_E2F3::FOXO6_002	-1.09338	0.863795	0.745459	0.74689	0.0337903	0.0344011	0.866922	706.382
HOMEO0101_Lhx9_3492.1	-1.0938	0.863961	0.802703	0.804293	0.0390551	0.0381739	0.857394	705.488
BU0042 Mafk_primary	-1.09453	0.864204	0.816547	0.818059	0.0386792	0.0362981	0.847889	704.665
TA0214_MYBL2_DBD_dimer	-1.09738	0.86459	0.757103	0.758613	0.0339394	0.0361753	0.878502	707.48
MA0777.1 MYBL2	-1.09738	0.86459	0.757103	0.758613	0.0339394	0.0361753	0.878502	707.48
AJ_MEIS1::HOXA13	-1.10135	0.865448	0.821425	0.82284	0.031561	0.0337858	0.880351	707.589
BACH1_HUMAN.H10MO.A	-1.10364	0.86597	0.852725	0.854208	0.0335098	0.0353336	0.877338	707.212
TAL1_HUMAN.H10MO.A	-1.10693	0.866711	0.823845	0.825317	0.0337264	0.0349485	0.873992	706.793
HOMEO0100_Lhx8_2247.2	-1.11019	0.867361	0.782923	0.784378	0.0322289	0.0344691	0.882011	707.566
TA0865_HES5_DBD_dimer	-1.12217	0.869884	0.771978	0.773987	0.0429497	0.0470691	0.89008	708.197
AJ_ELK1::ONECUT2_001	-1.12231	0.870012	0.774655	0.775852	0.0271532	0.0280444	0.876488	706.715
P73_HUMAN.H10MO.A	-1.12536	0.870582	0.805924	0.807315	0.0300934	0.0325118	0.887486	707.823
HOMEO0056_Hoxa7_2668.2	-1.13913	0.873555	0.82047	0.82213	0.0372416	0.038295	0.878971	706.612
AJ_FLI1::HOXB13_001	-1.14012	0.87372	0.836612	0.837876	0.0276626	0.029148	0.8848	707.195
AJ_CUX1::SOX15_001	-1.14012	0.873855	0.772388	0.773869	0.0349117	0.0341318	0.867394	705.493
MA0144.1 Stat3	-1.15387	0.876556	0.881886	0.883688	0.038925	0.0410493	0.887772	707.216
MA0699.1 LBX2	-1.15476	0.876791	0.908676	0.910521	0.0410656	0.0419971	0.880908	706.485
MA0624.1 NFATC1	-1.15492	0.876909	0.931571	0.932911	0.0312325	0.0304913	0.870134	705.463
TA0601_LBX2_DBD_monomer	-1.1554	0.876921	0.908813	0.910656	0.0409806	0.0419166	0.881073	706.489
MA0640.1 ELF3	-1.15816	0.877475	0.810058	0.811813	0.0387083	0.0398196	0.88295	706.621
TA0110_EHF_full_monomer	-1.15873	0.877559	0.822665	0.824477	0.0392254	0.0411282	0.887431	707.075
MA0598.2 EHF	-1.15883	0.877579	0.822816	0.824627	0.0391877	0.0410886	0.887451	707.075
AJ_TEAD4::MAX_002	-1.16694	0.879224	0.782658	0.784294	0.035201	0.0368577	0.88875	707.042
ETS0024 h-SPDEF	-1.16971	0.879894	0.90426	0.90572	0.0333705	0.0328042	0.874766	705.608
TA0517_EMX1_DBD_monomer	-1.17361	0.880549	0.911887	0.913411	0.0323268	0.0341464	0.892049	707.256
TA0114_ELF3_full_monomer	-1.17847	0.881561	0.810024	0.811809	0.0386287	0.0398108	0.887416	706.664
MA0701.1 LHX9	-1.18052	0.881966	0.942783	0.944491	0.036849	0.0380145	0.888045	706.688
COT2_HUMAN.H10MO.A	-1.18034	0.881995	0.879942	0.88154	0.0357604	0.0355814	0.87971	705.869
HME2_HUMAN.H10MO.D	-1.18473	0.88277	0.910885	0.911863	0.0206749	0.0217057	0.892833	707.106
TA0607_LHX9_DBD_monomer	-1.18516	0.882885	0.942835	0.944548	0.0368351	0.0379954	0.888924	706.685
MAFG_HUMAN.H10MO.S	-1.18745	0.883371	0.961297	0.962723	0.0312006	0.0315535	0.884859	706.23
TA0737_RORA_DBD_dimer	-1.18795	0.883484	0.717061	0.718626	0.0345096	0.0346073	0.883023	706.042
TA0428_XBP1_DBD_dimer	-1.18889	0.883658	0.794267	0.795958	0.0370117	0.0373758	0.884808	706.197
HU0033_ZNF317	-1.19023	0.883814	0.783938	0.785411	0.0302446	0.0325473	0.899409	707.723
MA0844.1 XBP1	-1.1897	0.883814	0.794457	0.796147	0.036928	0.0373393	0.885261	706.226
AJ_HOXB2::ETV7_003	-1.19584	0.884906	0.753287	0.754507	0.024835	0.0268201	0.901242	707.813
MA0102.1 Cebpa	-1.19683	0.885163	0.898153	0.899439	0.0272239	0.0282305	0.892377	706.81
MA0821.1 HES5	-1.19841	0.885385	0.787381	0.789439	0.0413033	0.0451503	0.904384	708.13
TA0706_NR2C2_DBD_dimer	-1.19946	0.885808	0.825909	0.8276	0.0384579	0.0370541	0.876035	705.19
MA0463.1 Bcl6	-1.20305	0.886451	0.847953	0.849589	0.0360855	0.0357326	0.883065	705.765
AJ_NR1I2	-1.2047	0.8868	0.850092	0.851502	0.0315398	0.0307366	0.879704	705.425
AJ_ERF::SREBF2_002	-1.20858	0.887356	0.769254	0.770712	0.0291611	0.0317295	0.905244	708.008
TA0589_Hoxd3_DBD_monomer	-1.20854	0.887491	0.919196	0.920897	0.0370021	0.0369794	0.886237	705.966
AJ_ETV2::FOXI1_005	-1.21019	0.887586	0.800953	0.802502	0.0292935	0.0336622	0.917156	709.517
ETS0023 h-GABPA	-1.21213	0.888107	0.900954	0.902567	0.0336343	0.0349955	0.89603	706.89
MA0677.1 Nr2f6	-1.21414	0.888665	0.79679	0.798702	0.0436883	0.0413596	0.874817	704.836
AJ_TEAD4::FOXI1_002	-1.22104	0.889833	0.775571	0.776797	0.0258554	0.0264033	0.893505	706.452
AJ_HOXB2::SOX15_004	-1.22215	0.890036	0.833137	0.834515	0.028931	0.0296361	0.89441	706.523
TA0349_HES5_DBD_dimer	-1.22765	0.890967	0.787476	0.789582	0.0412821	0.0451067	0.909585	708.118
TA0714_NR2F6_full_dimer	-1.22852	0.89138	0.797088	0.799019	0.0436058	0.0412903	0.877647	704.84
MA0489.1 JUN.var.2	-1.23094	0.891735	0.860892	0.862816	0.0412228	0.0410818	0.889845	705.904
MA0484.1 HNF4G	-1.23214	0.892135	0.871135	0.872717	0.0370228	0.0337212	0.869281	704.102
SOX2_HUMAN.H10MO.B	-1.23552	0.892523	0.805729	0.80731	0.0325276	0.033638	0.898994	706.745
MA0676.1 Nr2e1	-1.24071	0.89344	0.902046	0.903925	0.037481	0.0398181	0.905839	707.397
PBX3_HUMAN.H10MO.B	-1.24124	0.893597	0.868413	0.870164	0.0362109	0.0370737	0.89781	706.511
BU0006 Bcl6b_primary	-1.24168	0.893848	0.823462	0.825077	0.0365326	0.0341632	0.877261	704.597
HU0027_ZNF136	-1.24362	0.894039	0.751535	0.753116	0.0327102	0.0334124	0.897729	706.458
MA0666.1 MSX1	-1.24407	0.894153	0.927344	0.92944	0.0441399	0.044284	0.893789	706.051
TA0624_MSX1_full_monomer	-1.24451	0.894233	0.92748	0.929574	0.0440586	0.0442108	0.893913	706.056
HU0021_ZNF322	-1.25272	0.895597	0.800496	0.802089	0.0306582	0.0334402	0.913584	708.072
TA0707_NR2E1_full_monomer	-1.25443	0.895948	0.90192	0.903822	0.0375286	0.0398506	0.908157	707.386
DPRX_HUMAN.H10MO.D	-1.25431	0.896003	0.861779	0.863817	0.0421225	0.0426871	0.897901	706.277
TA0497_BSX_DBD_monomer	-1.25645	0.896321	0.952978	0.954469	0.029475	0.031182	0.907705	707.294
MA0876.1 BSX	-1.26193	0.897308	0.952997	0.954494	0.0294836	0.031183	0.908601	707.287
MGAP_HUMAN.H10MO.D	-1.26217	0.897491	0.757152	0.75892	0.0377341	0.0367889	0.890642	705.434
BU0094 Zfp128_primary	-1.26476	0.897799	0.794724	0.796299	0.0306354	0.0327383	0.911304	707.545
AJ_RORB_001	-1.26443	0.897825	0.756914	0.75852	0.0329131	0.0333838	0.899908	706.297
AJ_HOXB2::ETV1	-1.2656	0.897936	0.829163	0.831071	0.0367857	0.0396374	0.913203	707.756
HOMEO0022_Dlx3_1030.1	-1.26499	0.897951	0.827253	0.829302	0.0425659	0.0425622	0.896835	705.977
TA0600_LBX2_DBD_dimer	-1.26534	0.89797	0.865432	0.866749	0.026705	0.0273628	0.902303	706.529
MUSC_HUMAN.H10MO.D	-1.26962	0.898657	0.670521	0.672886	0.0455417	0.0489739	0.91346	707.704
MA0654.1 ISX	-1.27141	0.899059	0.921976	0.924801	0.0572766	0.0584002	0.902293	706.416
TA0111_ELF1_DBD_monomer	-1.2781	0.900207	0.81825	0.820369	0.0418673	0.0435861	0.907983	706.903
TA0598_ISX_full_monomer	-1.27994	0.900565	0.92195	0.924795	0.0573121	0.0584202	0.903722	706.41
TA0720_Nr2e1_DBD_monomer	-1.28339	0.901094	0.899682	0.901683	0.0384044	0.0409907	0.914192	707.515
MA0473.2 ELF1	-1.28393	0.901228	0.818144	0.820274	0.0418995	0.0436116	0.908937	706.899
AJ_ELK1::HOXA1_002	-1.28552	0.901475	0.79602	0.797919	0.0365855	0.0388357	0.913392	707.378
TA0775_ZNF232_full_monomer	-1.289	0.902145	0.743008	0.744733	0.0345041	0.035172	0.905289	706.41
NDF2_HUMAN.H10MO.D	-1.29421	0.903034	0.90435	0.905571	0.0241624	0.0247823	0.907512	706.552
MA0156.1 FEV	-1.30246	0.904458	0.937067	0.939326	0.0447038	0.0455769	0.907613	706.414
CR3L2_HUMAN.H10MO.D	-1.30328	0.904587	0.785949	0.788044	0.0411667	0.0422377	0.909116	706.56
HOMEO0064_Hoxb7_3953.1	-1.30305	0.904669	0.821131	0.823174	0.0430016	0.0411856	0.893934	705.068
AJ_TEAD4::SPDEF_001	-1.30936	0.9054	0.815245	0.816932	0.0282954	0.0338847	0.940811	710.772
MA0140.1 Tal1::Gata1	-1.31352	0.906309	0.837802	0.83958	0.0344914	0.0355868	0.912007	706.691
PAX2_HUMAN.H10MO.S	-1.31403	0.906502	0.970357	0.971556	0.0247271	0.0239802	0.898627	705.324
ERR3_HUMAN.H10MO.B	-1.32793	0.908781	0.897605	0.899592	0.0398526	0.0393051	0.904684	705.679
HOMEO0171_Tgif1_2342.2	-1.3353	0.910029	0.821935	0.823861	0.0392858	0.0378854	0.90099	705.208
MA0099.2 FOS::JUN	-1.35036	0.912424	0.955592	0.957191	0.0316246	0.0311238	0.907912	705.633
MA0035.3 Gata1	-1.35568	0.913183	0.879088	0.881252	0.0403979	0.0419495	0.920055	706.843
AJ_POU2F1::ETV4_001	-1.35623	0.913288	0.784888	0.786748	0.0351096	0.036039	0.917754	706.571
AJ_POU2F1::ETV4_002	-1.35623	0.913288	0.784888	0.786748	0.0351096	0.036039	0.917754	706.571
AJ_POU2F1::EOMES_004	-1.36911	0.915337	0.819916	0.821706	0.033975	0.0343475	0.916585	706.222
MA0874.1 Arx	-1.37034	0.915569	0.795258	0.797461	0.0427981	0.0422294	0.911662	705.688
TA0175_HSFY2_DBD_dimer	-1.37497	0.916318	0.85987	0.861784	0.0377587	0.0365627	0.908368	705.292
TA0174_HSFY2_DBD_trimer	-1.37738	0.916587	0.799585	0.801185	0.029629	0.0305176	0.921688	706.651
MA0076.1 ELK4	-1.37988	0.916825	0.860828	0.863357	0.0421248	0.0482036	0.942224	709.394
HOMEO0163_Six1_0935.2	-1.38041	0.917126	0.809469	0.811352	0.0364057	0.0358408	0.91276	705.64
TA0747_Rara_DBD_dimer	-1.38114	0.917172	0.76004	0.761994	0.0362499	0.0371835	0.921414	706.555
CEBPD_HUMAN.H10MO.B	-1.38194	0.917261	0.908618	0.910183	0.0284054	0.0297692	0.925861	707.064
TA0104_E2F2_DBD_dimer	-1.38187	0.91737	0.70349	0.705425	0.0378059	0.0367864	0.9105	705.393
HOMEO0003_Arx_1738.2	-1.38425	0.917706	0.79472	0.796944	0.042677	0.0422202	0.914387	705.745
AJ_ETV2::TEF_002	-1.38223	0.917767	0.762248	0.76397	0.0396294	0.0326729	0.87331	702.454
TA0165_LEF1_DBD_monomer	-1.38538	0.918081	0.808906	0.810904	0.0426475	0.0378614	0.89086	703.646
MA0626.1 Npas2	-1.3894	0.918491	0.898224	0.90044	0.0424226	0.0419047	0.914859	705.712
TA0397_CREB3_full_dimer	-1.39013	0.918548	0.797676	0.79969	0.0373343	0.0380898	0.921657	706.43
AJ_TEAD4::ETV4	-1.39214	0.918854	0.805865	0.80784	0.0365883	0.0372908	0.92175	706.407
AJ_HOXC10::EOMES	-1.39201	0.918976	0.831372	0.832993	0.0325886	0.0305759	0.904238	704.661
TA0279_RUNX3_DBD_monomer	-1.39546	0.919383	0.866311	0.868434	0.0399864	0.0399967	0.918395	705.985
TA0365_NEUROG2_full_dimer	-1.3943	0.919433	0.855179	0.857402	0.0472218	0.0418524	0.891957	703.617
MA0638.1 CREB3	-1.39643	0.919495	0.797655	0.79968	0.0372839	0.0381021	0.92293	706.469
MA0768.1 LEF1	-1.3954	0.919594	0.808694	0.810709	0.0427036	0.0379143	0.892533	703.648
TA0283_GMEB2_DBD_dimer	-1.39745	0.919657	0.766873	0.768666	0.0331913	0.0337196	0.92188	706.333
HOMEO0164_Six2_2307.2	-1.40083	0.920229	0.789802	0.791721	0.0369327	0.0359982	0.913801	705.429
TA0709_NR2F1_DBD_dimer	-1.4086	0.921449	0.784205	0.786492	0.0454733	0.0426401	0.906729	704.649
HOMEO0029_Emx2_3420.1	-1.41009	0.921465	0.817241	0.819204	0.0344594	0.0366077	0.932526	707.397
MA0669.1 NEUROG2	-1.40923	0.921652	0.855158	0.857405	0.0472629	0.0418628	0.894252	703.607
TA0289_MGA_DBD_dimer	-1.41167	0.921771	0.745939	0.74771	0.0325986	0.0329727	0.923077	706.234
AJ_GCM1::FOXI1_005	-1.41721	0.922545	0.830309	0.832054	0.0312348	0.0323554	0.928623	706.785
TA0444_FOXG1_DBD_multimer	-1.41669	0.922593	0.806678	0.808755	0.0401222	0.0385092	0.912964	705.111
AJ_TEAD4::ONECUT2	-1.41988	0.922988	0.778587	0.780406	0.0336853	0.0336761	0.921903	705.973
PPARG_HUMAN.H10MO.S	-1.42004	0.92301	0.924529	0.926334	0.0333781	0.0333974	0.9221	705.992
VDR_HUMAN.H10MO.S	-1.42327	0.923472	0.985063	0.986287	0.0225227	0.0226021	0.923163	706.057
MA0032.1 FOXC1	-1.4331	0.92489	0.975454	0.976132	0.0124637	0.0124268	0.923266	705.914
FEV_HUMAN.H10MO.C	-1.43339	0.924899	0.920363	0.922661	0.041394	0.0421414	0.927477	706.381
AJ_ETV2::HOXB13_001	-1.43425	0.92499	0.838712	0.840475	0.0310908	0.0323055	0.931585	706.858
MA0591.1 Bach1::Mafk	-1.43535	0.925045	0.811659	0.813823	0.0354249	0.0396576	0.94542	708.773
BU0023 Gata6_primary	-1.43906	0.925563	0.846089	0.848207	0.0343653	0.0387057	0.946923	708.943
ISL1_HUMAN.H10MO.D	-1.44001	0.925929	0.962506	0.96473	0.0422119	0.0405777	0.916772	705.143
AJ_ELK1::HOXA3_002	-1.44353	0.926318	0.874052	0.875743	0.0299688	0.0307924	0.930684	706.594
TA0382_USF1_DBD_dimer	-1.44388	0.926363	0.871037	0.87359	0.0451524	0.0464799	0.931092	706.637
HXA5_HUMAN.H10MO.D	-1.45406	0.927883	0.878311	0.880654	0.0439126	0.0423273	0.919378	705.198
AJ_HOXB2::PAX9_002	-1.45793	0.928215	0.778069	0.779832	0.0288035	0.0317947	0.945732	708.39
AJ_HOXD12::TBX21_001	-1.45883	0.928493	0.759115	0.760913	0.0326629	0.0323771	0.925727	705.787
AJ_TEAD4::SOX6	-1.4683	0.929707	0.78539	0.787156	0.0303432	0.0316052	0.936569	706.916
HU0032_ZNF416	-1.46934	0.929891	0.724408	0.726227	0.0321647	0.0325372	0.931149	706.236
TA0540_Gbx1_DBD_monomer	-1.472	0.930253	0.909283	0.911922	0.0467346	0.0471202	0.930866	706.162
TA0806_SOX2_DBD_dimer	-1.47288	0.930314	0.751793	0.754061	0.0386075	0.0404872	0.938414	707.079
TA0393_CREB3L1_DBD_dimer	-1.47322	0.930356	0.774423	0.776523	0.0356139	0.0374826	0.939119	707.167
MA0065.1 PPARG::RXRA	-1.47207	0.930443	0.772083	0.774213	0.0419183	0.0379953	0.909069	704.014
TA0744_RXRG_DBD_dimer	-1.47434	0.93057	0.771889	0.774155	0.0401209	0.0404017	0.930939	706.134
HOMEO0036_Gbx2_3110.1	-1.47581	0.930784	0.798864	0.801028	0.0386928	0.0385302	0.928957	705.887
EHF_HUMAN.H10MO.S	-1.48729	0.932224	0.869044	0.871047	0.0336169	0.035395	0.940949	707.177
HOMEO0159_Rhox11_1765.2	-1.48757	0.93241	0.843783	0.845567	0.0330274	0.031509	0.922008	704.99
AJ_HOXB2::PAX5_001	-1.49099	0.932753	0.799477	0.801078	0.0276577	0.0282212	0.935632	706.433
TA0441_FOXD3_DBD_dimer	-1.49066	0.932846	0.869585	0.871997	0.0453868	0.0425003	0.918617	704.623
AJ_ELK1::HOXA1_001	-1.49368	0.933009	0.773649	0.775748	0.0337783	0.0369608	0.948449	708.156
TEAD4_HUMAN.H10MO.A	-1.49609	0.933425	0.875179	0.877206	0.035095	0.035612	0.935242	706.307
MA0839.1 CREB3L1	-1.49928	0.933787	0.774593	0.776728	0.0355985	0.0374361	0.942198	707.147
MA0629.1 Rhox11	-1.49842	0.933824	0.842719	0.844518	0.0330979	0.0315327	0.923224	704.962
GCR_HUMAN.H10MO.A	-1.50422	0.934456	0.846383	0.848344	0.0333684	0.0342557	0.938433	706.574
AJ_TEAD4::ERG_001	-1.51902	0.936479	0.779655	0.781307	0.030612	0.028567	0.921842	704.557
AJ_SOX6::TBX21_001	-1.52248	0.936771	0.811794	0.813684	0.0319643	0.0326187	0.939583	706.435
TA0605_LHX6_full_dimer	-1.52304	0.936781	0.761702	0.764076	0.0384522	0.0409891	0.947364	707.483
AJ_HOXB13::TBX3_001	-1.52452	0.937077	0.806737	0.808616	0.0328745	0.0323946	0.933307	705.66
BRAC_HUMAN.H10MO.D	-1.52949	0.937683	0.687657	0.689443	0.030954	0.0306808	0.935042	705.786
TEAD1_HUMAN.H10MO.D	-1.53836	0.938727	0.878101	0.879918	0.0304479	0.0310461	0.941348	706.417
AJ_HOXA7	-1.54046	0.939123	0.944784	0.946746	0.0359734	0.0334449	0.923966	704.485
AJ_ETV5::EVX1_002	-1.54447	0.939445	0.808727	0.810544	0.0298697	0.0309267	0.944784	706.774
MA0630.1 SHOX	-1.54822	0.939933	0.933836	0.936581	0.0462799	0.0465936	0.940224	706.129
AJ_ETV2::FOXI1_002	-1.54981	0.939998	0.801904	0.803847	0.0296903	0.0329621	0.956863	708.545
HOMEO0107_Mrg2_2302.1	-1.54854	0.940021	0.827207	0.829428	0.0386924	0.0376798	0.93408	705.41
TA0092_TFCP2_full_dimer	-1.55203	0.940324	0.856728	0.858953	0.0357042	0.0376939	0.948977	707.243
ELF1_HUMAN.H10MO.A	-1.55553	0.940748	0.848029	0.850259	0.0359402	0.037689	0.948227	707.079
ETV6_HUMAN.H10MO.D	-1.55866	0.941048	0.866448	0.868967	0.0382664	0.0425001	0.957811	708.556
TA0671_SHOX2_DBD_monomer	-1.55998	0.941323	0.928758	0.931709	0.0491919	0.0497142	0.942296	706.215
ATOH1_HUMAN.H10MO.D	-1.55962	0.94133	0.878238	0.880237	0.0344877	0.0336773	0.935963	705.468
AJ_GCM2::DLX3_001	-1.56074	0.941464	0.804153	0.805916	0.0304223	0.0296739	0.935888	705.444
MA0145.3 TFCP2	-1.56861	0.942273	0.856466	0.858719	0.0357664	0.0377499	0.950735	707.236
CREB3_HUMAN.H10MO.D	-1.57028	0.942435	0.798362	0.800791	0.0375826	0.0406689	0.954944	707.865
MA0017.1 NR2F1	-1.57036	0.942544	0.867483	0.869509	0.0337972	0.0339041	0.942177	706.049
TA0531_En2_DBD_monomer	-1.57192	0.942633	0.895407	0.897775	0.0368423	0.0396084	0.954077	707.698
AJ_ELK1::FOXI1_004	-1.57207	0.942668	0.832621	0.834486	0.029451	0.0311888	0.951656	707.319
ESX1_HUMAN.H10MO.D	-1.58114	0.943719	0.833047	0.835866	0.04467	0.0468586	0.951056	707.086
TA0670_Rhox11_DBD_monomer	-1.58215	0.943873	0.941531	0.943069	0.0250868	0.0255516	0.946187	706.392
TA0611_LMX1B_full_monomer	-1.58601	0.944284	0.947973	0.949911	0.0309299	0.0321127	0.949865	706.839
AJ_ELF2_001	-1.58662	0.944298	0.851759	0.85406	0.0351383	0.0381341	0.957036	707.94
HOMEO0175_Uncx4.1_2281.2	-1.5871	0.944468	0.783624	0.786433	0.0468586	0.0465026	0.942175	705.813
HOMEO0177_Vax2_3500.1	-1.58807	0.944644	0.830227	0.832656	0.0423498	0.040171	0.933949	704.875
HOMEO0161_Rhox6_4251.1	-1.59381	0.94524	0.817578	0.819978	0.0404667	0.0395563	0.940219	705.489
PPARA_HUMAN.H10MO.S	-1.59436	0.945258	0.957148	0.959446	0.037565	0.0378658	0.945741	706.157
ETS0008 h-Elk3	-1.60569	0.946367	0.871722	0.874463	0.0396475	0.0448961	0.965003	709.094
BU0012 Elf3_primary	-1.60541	0.946467	0.894975	0.896907	0.0311201	0.031621	0.948316	706.337
AJ_ELK1::EVX1	-1.60688	0.946659	0.77907	0.781132	0.0339871	0.0337215	0.944366	705.808
HOMEO0065_Hoxb8_3780.2	-1.60806	0.946819	0.822985	0.825448	0.0414643	0.0402401	0.940551	705.338
TA0542_HESX1_DBD_monomer	-1.60876	0.946882	0.899389	0.902486	0.0516368	0.0505832	0.942314	705.534
MA0894.1 HESX1	-1.61194	0.947226	0.899266	0.902372	0.05168	0.0506226	0.942661	705.533
AJ_GCM2::SOX15_003	-1.6192	0.947911	0.788551	0.790341	0.0275814	0.0290565	0.955628	707.19
MA0645.1 ETV6	-1.62009	0.947979	0.886155	0.88871	0.0384586	0.0414686	0.959276	707.773
PO2F1_HUMAN.H10MO.B	-1.61911	0.948031	0.89856	0.90124	0.0454493	0.0434885	0.939244	705.049
TA0138_ETV6_full_monomer	-1.62126	0.948104	0.886096	0.888655	0.0384886	0.0415061	0.959404	707.777
MA0853.1 Alx4	-1.62869	0.949036	0.80214	0.804792	0.0444153	0.0427817	0.941533	705.184
NFAC3_HUMAN.H10MO.B	-1.62995	0.949086	0.928873	0.931021	0.0338133	0.0346331	0.952204	706.52
MA0017.2 NR2F1	-1.63366	0.94949	0.863141	0.8658	0.0422833	0.0427789	0.950563	706.239
AJ_PITX1::FIGLA	-1.63675	0.949733	0.818608	0.820685	0.0308922	0.033368	0.961069	707.818
AJ_ELK1::EOMES_002	-1.64548	0.950648	0.780426	0.782686	0.0338827	0.0361164	0.959914	707.481
AJ_NR1D2	-1.64603	0.95076	0.791186	0.793421	0.0350619	0.0356872	0.952804	706.376
TA0849_NR2F1_DBD_monomer	-1.64902	0.951074	0.863138	0.865823	0.0423357	0.042797	0.951992	706.221
AJ_FOXO1::ETV4_002	-1.65138	0.951229	0.84656	0.848612	0.0301061	0.0326644	0.963013	707.934
MA0028.2 ELK1	-1.65593	0.951614	0.840569	0.843735	0.043118	0.0502988	0.972811	709.962
TA0310_TBX2_full_dimer	-1.65772	0.951967	0.760729	0.762996	0.0359271	0.0359284	0.951097	705.98
AJ_MEIS1::HOXB13	-1.65915	0.952131	0.840836	0.842919	0.0335276	0.032995	0.948563	705.632
BATF_HUMAN.H10MO.S	-1.66022	0.952274	0.893551	0.896088	0.0418708	0.0401388	0.94415	705.087
TA0711_NR2F1_full_monomer	-1.66463	0.952653	0.943841	0.946382	0.040046	0.0401113	0.952051	706.015
HOMEO0057_Hoxa7_3750.1	-1.66487	0.952757	0.808057	0.810542	0.0415126	0.0392038	0.941995	704.788
MA0754.1 CUX1	-1.66989	0.953205	0.851281	0.854473	0.0514125	0.0502347	0.948461	705.48
TA0096_CUX1_DBD_monomer	-1.67189	0.953402	0.851159	0.854358	0.0514588	0.0502732	0.948644	705.477
TA0496_BARX1_DBD_monomer	-1.67216	0.953455	0.949166	0.951402	0.0366723	0.035126	0.945279	705.07
MA0875.1 BARX1	-1.67405	0.953639	0.949216	0.951454	0.0366592	0.0351228	0.945525	705.075
TA0808_SOX2_full_dimer	-1.67674	0.953773	0.741008	0.743551	0.0376054	0.039875	0.961944	707.351
MA0731.1 BCL6B	-1.6771	0.953855	0.725327	0.727785	0.0378071	0.038529	0.95602	706.404
TA0031_BCL6B_DBD_monomer	-1.68093	0.954226	0.72521	0.727675	0.0378251	0.0385381	0.956343	706.399
AJ_TEAD4::PITX1_005	-1.68226	0.954394	0.781371	0.783543	0.0343684	0.0339232	0.951402	705.696
TA0871_ELK1_DBD_monomer	-1.68463	0.95444	0.840522	0.843744	0.0432298	0.0503059	0.974553	709.888
TA0620_MIXL1_full_monomer	-1.68416	0.954567	0.924213	0.927019	0.0440527	0.0437793	0.9527	705.843
HU0028_ZNF45	-1.68729	0.954844	0.793945	0.796297	0.0361891	0.0366272	0.955906	706.248
TA0702_HNF4A_full_dimer	-1.68693	0.954909	0.781975	0.784659	0.04451	0.0417847	0.943316	704.672
MA0662.1 MIXL1	-1.69049	0.955172	0.924289	0.927102	0.0440056	0.0437244	0.953286	705.839
MA0091.1 TAL1::TCF3	-1.6948	0.955536	0.873136	0.875671	0.0382092	0.0393207	0.959143	706.63
AJ_MEIS1::DRGX_002	-1.69455	0.955644	0.85453	0.857354	0.0470378	0.0437566	0.942507	704.496
TAL1_HUMAN.H10MO.S	-1.69794	0.955794	0.826413	0.829177	0.0402301	0.0428019	0.964229	707.434
MA0113.2 NR3C1	-1.69724	0.955839	0.877052	0.878886	0.0292532	0.0283856	0.950067	705.335
MA0883.1 Dmbx1	-1.69932	0.955904	0.839051	0.841369	0.0331338	0.0358722	0.96672	707.878
MA0507.1 POU2F2	-1.69953	0.955997	0.854972	0.8581	0.0476732	0.0483741	0.957438	706.306
GSC_HUMAN.H10MO.D	-1.70045	0.956075	0.880486	0.883509	0.0457695	0.0467252	0.958447	706.445
TA0759_THRB_DBD_dimer	-1.70338	0.95627	0.746513	0.748829	0.0326208	0.0357543	0.968655	708.2
AJ_ETV5::HOXA13_002	-1.70651	0.956588	0.827464	0.829435	0.0284556	0.0303738	0.965386	707.516
MA0881.1 Dlx4	-1.70777	0.95679	0.938523	0.941537	0.0467726	0.0463751	0.954598	705.793
TA0562_HOXB3_DBD_monomer	-1.71004	0.95697	0.936238	0.938475	0.0338891	0.0343809	0.958364	706.302
MA0903.1 HOXB3	-1.71244	0.95719	0.93625	0.938489	0.0338552	0.0343611	0.958644	706.311
TA0507_DLX4_DBD_monomer	-1.71313	0.957282	0.938543	0.941565	0.0467587	0.046349	0.95506	705.787
BU0011 Ehf_primary	-1.71899	0.957819	0.870388	0.872487	0.032505	0.0320852	0.954943	705.697
AJ_MYBL1::ONECUT2	-1.7281	0.95862	0.766544	0.768533	0.030236	0.0302368	0.957801	705.98
MA0882.1 DLX6	-1.73102	0.958863	0.938449	0.941519	0.0459802	0.0466097	0.960098	706.283
TA0136_ETV5_DBD_monomer	-1.73283	0.95893	0.893178	0.895825	0.0363428	0.0401615	0.971854	708.419
TA0509_DLX6_DBD_monomer	-1.73324	0.959058	0.938269	0.941351	0.0460937	0.0467268	0.960296	706.284
MA0765.1 ETV5	-1.73556	0.959171	0.892899	0.895557	0.0364314	0.0402662	0.972067	708.424
MA0071.1 RORA	-1.73455	0.959189	0.891532	0.894523	0.0452777	0.045306	0.958466	705.993
TA0673_Shox2_DBD_monomer	-1.74083	0.959734	0.927287	0.930654	0.0506214	0.0508162	0.959501	706.064
MA0720.1 Shox2	-1.74091	0.959741	0.927231	0.9306	0.0506608	0.0508596	0.959519	706.066
PRRX2_HUMAN.H10MO.C	-1.75137	0.96065	0.942495	0.945937	0.0517692	0.0516483	0.959493	705.928
TA0182_IRF7_DBD_trimer	-1.75277	0.960855	0.772474	0.775	0.0406332	0.0378537	0.948719	704.524
AJ_RFX3::BHLHA15	-1.75418	0.960938	0.774572	0.776551	0.0309325	0.029643	0.953511	705.08
AJ_MEIS1::DLX3	-1.75495	0.960944	0.800707	0.803189	0.0368994	0.0371585	0.961177	706.135
AJ_E2F3::DRGX	-1.75694	0.960962	0.796333	0.798885	0.0325845	0.0382084	0.979877	710.118
JUNB_HUMAN.H10MO.C	-1.75589	0.961179	0.875006	0.877802	0.0468384	0.0418041	0.941564	703.739
HOMEO0172_Tgif2_3451.1	-1.76206	0.961586	0.799048	0.801667	0.0402123	0.0390408	0.956287	705.347
AJ_GCM1::ETV7_002	-1.76799	0.961948	0.749007	0.751064	0.0278741	0.0305984	0.973487	708.241
AJ_ETV5::HOXA2_001	-1.77032	0.962163	0.821217	0.823388	0.0300377	0.0322501	0.970988	707.664
MA0633.1 Twist2	-1.77145	0.962271	0.885521	0.888858	0.046865	0.0495232	0.969073	707.266
TA0757_Rxrb_DBD_dimer	-1.77151	0.962426	0.77011	0.773004	0.0461564	0.0429043	0.95016	704.482
TA0672_SHOX_DBD_monomer	-1.77746	0.962824	0.929514	0.932934	0.0505947	0.0505649	0.961954	705.966
FOXD1_HUMAN.H10MO.D	-1.77687	0.962853	0.852062	0.854275	0.0349047	0.0327146	0.952027	704.64
NR2E3_HUMAN.H10MO.C	-1.78229	0.963236	0.829988	0.832154	0.0325042	0.0319367	0.959866	705.598
AIRE_HUMAN.H10MO.C	-1.78453	0.963368	0.842302	0.844177	0.0269202	0.027624	0.966198	706.563
MA0028.1 ELK1	-1.78662	0.963479	0.922924	0.925092	0.029378	0.0319128	0.973505	707.965
TA0623_MSX1_DBD_monomer	-1.78668	0.963613	0.921511	0.925084	0.054559	0.0525435	0.957218	705.18
AJ_ETV2::SOX15_004	-1.79416	0.964098	0.784434	0.786564	0.0292573	0.0312035	0.971833	707.495
RUNX3_HUMAN.H10MO.C	-1.79337	0.964134	0.897478	0.900087	0.0392846	0.0382222	0.959344	705.391
P63_HUMAN.H10MO.A	-1.80606	0.965106	0.823481	0.825593	0.0310261	0.0307328	0.962998	705.772
TA0213_MYBL2_DBD_monomer	-1.80759	0.965147	0.842852	0.845413	0.0348583	0.0372425	0.972949	707.54
AJ_ETV2::ONECUT2_002	-1.80935	0.965297	0.74539	0.747561	0.0299602	0.0315501	0.971331	707.181
ETS0010 h-ERF	-1.8143	0.965637	0.890344	0.893088	0.0362437	0.0397711	0.9764	708.231
TA0511_DPRX_DBD_monomer	-1.81635	0.965954	0.913137	0.915346	0.033957	0.0319539	0.956224	704.718
HOMEO0099_Lhx6_3432.1	-1.81936	0.966084	0.803405	0.805914	0.0352442	0.0362585	0.969114	706.623
TA0803_SOX21_DBD_dimer	-1.8225	0.966291	0.785767	0.788873	0.0422597	0.0448036	0.973025	707.347
MA0752.1 ZNF410	-1.83558	0.967243	0.735827	0.738704	0.0380952	0.0412205	0.976164	707.863
ETS0018 h-ETV5	-1.83619	0.967253	0.876686	0.879579	0.0367629	0.0414365	0.980391	708.963
MA0482.1 Gata4	-1.84077	0.967674	0.902701	0.905254	0.0355658	0.036453	0.970145	706.536
ZN784_HUMAN.H10MO.D	-1.84391	0.967914	0.871935	0.874672	0.0385739	0.0390101	0.968662	706.23
HOMEO0035_Gbx1_2883.2	-1.84754	0.96819	0.807005	0.809777	0.0395481	0.039433	0.967071	705.915
MA0885.1 Dlx2	-1.85063	0.968453	0.936321	0.940194	0.0573345	0.0549876	0.961921	705.096
MA0502.1 NFYB	-1.85186	0.96853	0.838568	0.841616	0.044655	0.0432309	0.963356	705.288
AJ_TEAD4::DLX3_003	-1.85269	0.968539	0.823661	0.825976	0.0323459	0.0328513	0.969821	706.327
CREM_HUMAN.H10MO.C	-1.85338	0.968564	0.869338	0.872022	0.0365729	0.0380654	0.97286	706.898
TA0077_ZNF410_DBD_monomer	-1.85567	0.968692	0.736266	0.739169	0.0380306	0.0411293	0.977297	707.85
TA0516_Dlx2_DBD_monomer	-1.85704	0.968907	0.936411	0.940288	0.0571954	0.0548429	0.962396	705.092
MA0164.1 Nr2e3	-1.86127	0.969136	0.90654	0.910991	0.0613767	0.0628528	0.971429	706.516
TA0519_EMX2_DBD_monomer	-1.86131	0.969141	0.893951	0.897044	0.0427405	0.0436671	0.971147	706.463
MA0886.1 EMX2	-1.86312	0.969267	0.893927	0.897023	0.0427502	0.0436773	0.97127	706.463
HOMEO0025_Dmbx1_2277.1	-1.86876	0.969608	0.83878	0.841315	0.033049	0.0356603	0.977807	707.791
TA0277_RUNX2_DBD_monomer	-1.86863	0.969716	0.881478	0.884292	0.041317	0.0395592	0.963087	705.062
MA0511.2 RUNX2	-1.86863	0.969716	0.881478	0.884292	0.041317	0.0395592	0.963087	705.062
MA0709.1 Msx3	-1.86956	0.969771	0.920392	0.924292	0.0567605	0.0548047	0.964338	705.233
TA0629_Msx3_DBD_monomer	-1.87422	0.97009	0.920234	0.924154	0.0569164	0.0549385	0.964646	705.227
TA0835_Sox11_DBD_dimer	-1.87492	0.970096	0.726024	0.729249	0.0449891	0.0452042	0.969995	706.085
MA0869.1 Sox11	-1.87495	0.970098	0.726025	0.72925	0.0449761	0.0452061	0.970039	706.092
MAFK_HUMAN.H10MO.S	-1.87858	0.970296	0.850451	0.853601	0.0416384	0.044087	0.976361	707.314
TA0344_BHLHE23_DBD_dimer	-1.87997	0.97055	0.859153	0.862269	0.0479963	0.0435224	0.955901	704.022
MA0818.1 BHLHE22	-1.8814	0.970647	0.859178	0.862297	0.0480172	0.0435264	0.955968	704.015
BCL6B_HUMAN.H10MO.D	-1.8938	0.971376	0.846109	0.849074	0.0416404	0.0411437	0.96916	705.718
TA0439_FOXD2_DBD_dimer	-1.8948	0.97146	0.878946	0.881981	0.0433423	0.0420755	0.966926	705.345
ZBT18_HUMAN.H10MO.D	-1.8972	0.971511	0.830528	0.833355	0.0359396	0.0391854	0.980392	708.062
AJ_FLI1::FOXI1_004	-1.90712	0.972107	0.798253	0.800674	0.0288001	0.0334003	0.986168	709.787
TA0557_HOXA1_DBD_monomer	-1.90827	0.972324	0.928258	0.930838	0.0363293	0.0355232	0.968813	705.496
TBX4_HUMAN.H10MO.D	-1.90783	0.972345	0.735024	0.737576	0.0376533	0.0351301	0.962404	704.552
TA0685_Vsx1_DBD_monomer	-1.91349	0.972613	0.926587	0.930175	0.048157	0.0492891	0.974674	706.504
AJ_HOXB13::ONECUT2_002	-1.91434	0.972646	0.801583	0.803761	0.0285507	0.0299116	0.977281	707.056
MA0495.1 MAFF	-1.9171	0.972828	0.813246	0.81573	0.0328245	0.0340645	0.976422	706.828
MA0106.1 TP53	-1.91869	0.972948	0.740877	0.743167	0.0309034	0.0313643	0.974026	706.311
HU0001_ZNF675	-1.92183	0.973086	0.743083	0.745763	0.0337434	0.0366674	0.981316	707.974
AJ_TEAD4::CEBPD_003	-1.92153	0.973192	0.750214	0.752337	0.0306124	0.0290238	0.965661	704.866
TA0505_DLX2_DBD_monomer	-1.92272	0.973213	0.934256	0.937281	0.0413253	0.0413432	0.972593	705.989
AJ_PITX1::HES7_001	-1.93179	0.97375	0.793253	0.795449	0.0291487	0.0298842	0.975941	706.543
MA0717.1 RAX2	-1.93535	0.973984	0.928735	0.932224	0.0471576	0.047379	0.973871	706.083
TGIF1_HUMAN.H10MO.S	-1.93405	0.974064	0.983021	0.985092	0.0325033	0.0280998	0.952897	703.198
TA0419_Mafb_DBD_monomer	-1.93686	0.97407	0.866209	0.868874	0.0357514	0.0361637	0.974738	706.235
TA0664_RAXL1_DBD_monomer	-1.93889	0.974199	0.928778	0.93227	0.0471069	0.0473374	0.974108	706.088
AJ_TEAD4::EOMES_004	-1.94029	0.97427	0.798575	0.800569	0.0265075	0.0270083	0.975749	706.4
AJ_HOXD12::ELK1_001	-1.9426	0.974344	0.766259	0.768799	0.0311198	0.0343815	0.983767	708.413
ETS0017 h-ETV4	-1.94327	0.974395	0.893215	0.896126	0.0361773	0.039383	0.98251	708.021
GABPA_HUMAN.H10MO.A	-1.9451	0.97444	0.864634	0.867669	0.0344225	0.041053	0.989504	710.642
TA0713_NR2F6_DBD_dimer	-1.94216	0.97446	0.775391	0.778657	0.0470109	0.0441578	0.965869	704.683
GATA6_HUMAN.H10MO.S	-1.94597	0.974578	0.97843	0.980426	0.0254861	0.0269711	0.98	707.302
TA0032_CTCF_full_monomer	-1.94666	0.974641	0.786223	0.789288	0.0401521	0.0413907	0.977369	706.67
MA0115.1 NR1H2::RXRA	-1.94651	0.974693	0.730091	0.733113	0.0422831	0.0407745	0.969612	705.207
AJ_HOXB2::PITX1_002	-1.95402	0.975048	0.828268	0.830867	0.0328423	0.0349581	0.980959	707.446
MA0117.2 Mafb	-1.95676	0.975251	0.866147	0.868841	0.0357728	0.0361754	0.975866	706.229
OLIG1_HUMAN.H10MO.D	-1.95667	0.975305	0.776004	0.779401	0.048088	0.0455969	0.968126	704.867
STAT3_HUMAN.H10MO.A	-1.95901	0.975367	0.900538	0.903225	0.0350612	0.0360481	0.977768	706.609
HSFY1_HUMAN.H10MO.D	-1.95934	0.97543	0.83096	0.83373	0.0379438	0.0371437	0.972285	705.52
AJ_ELK1::HOXB13_001	-1.96181	0.97553	0.765468	0.767979	0.0327769	0.0336423	0.977742	706.569
TA0204_TGIF1_DBD_dimer	-1.96333	0.975602	0.760957	0.764565	0.046185	0.0483085	0.979739	707.017
MA0796.1 TGIF1	-1.96333	0.975602	0.760957	0.764565	0.046185	0.0483085	0.979739	707.017
TA0515_Dlx1_DBD_monomer	-1.96262	0.975609	0.941074	0.944802	0.0504862	0.0499158	0.973659	705.732
TA0399_Creb3l2_DBD_dimer	-1.96427	0.975684	0.749808	0.752798	0.0395389	0.0400122	0.976369	706.245
MA0476.1 FOS	-1.96503	0.975787	0.883559	0.886953	0.0478461	0.0453711	0.968697	704.869
TA0745_RXRG_full_dimer	-1.96516	0.975804	0.75263	0.756023	0.0483251	0.0453428	0.967324	704.662
ETS0015 h-ETV2	-1.96875	0.975899	0.915332	0.917668	0.0292967	0.0311849	0.981674	707.447
AJ_GATA1	-1.97361	0.976273	0.954951	0.95875	0.0533067	0.0505577	0.969285	704.872
MA0152.1 NFATC2	-1.98716	0.976935	0.958213	0.960834	0.0329162	0.0346728	0.981581	707.188
MA0880.1 Dlx3	-1.99158	0.977226	0.939245	0.942871	0.0483435	0.0478442	0.975462	705.753
GATA4_HUMAN.H10MO.B	-1.99452	0.97736	0.941109	0.943725	0.0337705	0.0344736	0.978908	706.443
TA0597_ISX_DBD_monomer	-1.99458	0.977368	0.915534	0.919461	0.0510295	0.0517489	0.978237	706.292
TA0506_DLX3_DBD_monomer	-1.99963	0.97766	0.939213	0.942859	0.0484275	0.047912	0.975879	705.746
TA0791_SOX14_DBD_dimer	-2.00237	0.977754	0.789072	0.792523	0.0429331	0.0453035	0.982445	707.231
AJ_HOXD12::ELK3_002	-2.00549	0.977927	0.797236	0.799838	0.0326351	0.034103	0.981704	706.994
ETS1_HUMAN.H10MO.C	-2.00783	0.978048	0.936154	0.9383	0.0268038	0.0280995	0.982105	707.071
TA0225_PAX1_DBD_monomer	-2.0279	0.979071	0.779832	0.782194	0.0287915	0.0306285	0.984259	707.432
MA0779.1 PAX1	-2.0279	0.979071	0.779832	0.782194	0.0287915	0.0306285	0.984259	707.432
MA0027.2 EN1	-2.02976	0.97923	0.930188	0.933323	0.0415121	0.0405915	0.976259	705.496
TA0523_EN1_full_monomer	-2.03607	0.979545	0.930074	0.933224	0.0415737	0.0406381	0.976565	705.489
DBP_HUMAN.H10MO.B	-2.03729	0.979582	0.882144	0.885114	0.0380785	0.0383023	0.979588	706.109
HOMEO0162_Shox2_2641.2	-2.0378	0.979621	0.833221	0.836672	0.0450192	0.0444888	0.977815	705.721
HOMEO0014_Cphx_3484.1	-2.04062	0.979763	0.816845	0.820157	0.0432763	0.0426413	0.977655	705.658
TA0660_PRRX1_full_monomer	-2.04163	0.979789	0.929997	0.933608	0.0457663	0.0464818	0.980735	706.327
AJ_TEAD4::FOXI1_005	-2.04647	0.98006	0.807023	0.808732	0.022592	0.0219371	0.976405	705.35
TA0199_Meis3_DBD_monomer	-2.04622	0.980086	0.96917	0.971114	0.0268576	0.0249428	0.971246	704.465
TA0319_TEAD3_DBD_dimer	-2.05027	0.980199	0.808659	0.811415	0.0343576	0.0353295	0.98228	706.612
AJ_ELK1::FOXI1_002	-2.0509	0.980209	0.814858	0.817118	0.0273847	0.0289729	0.984752	707.296
TA0231_PAX6_DBD_monomer	-2.05307	0.98031	0.782951	0.785176	0.0267832	0.028489	0.98527	707.429
HOMEO0168_Six6_2267.5	-2.05248	0.980337	0.805298	0.808157	0.0370962	0.0365996	0.9784	705.686
TA0307_TBX21_full_dimer	-2.05362	0.980367	0.713211	0.716301	0.03882	0.039541	0.981565	706.393
TA0197_Meis2_DBD_monomer	-2.05195	0.980395	0.971398	0.973377	0.0282506	0.0253153	0.967047	703.81
TA0723_Nr2f6_DBD_dimer	-2.05479	0.980517	0.777265	0.78059	0.0467342	0.0424911	0.969122	704.07
TA0590_Hoxd9_DBD_monomer	-2.06008	0.980754	0.937574	0.939647	0.028653	0.0264227	0.97122	704.331
TA0436_FOXC2_DBD_dimer	-2.06108	0.980756	0.829773	0.833131	0.0439883	0.0428014	0.977398	705.393
MA0856.1 RXRG	-2.06528	0.980993	0.783646	0.786948	0.0452643	0.0419909	0.972254	704.444
AJ_HOXD12::ELK3_003	-2.07104	0.981158	0.792868	0.795515	0.0316642	0.0335992	0.985777	707.368
TA0130_ETS1_full_monomer	-2.07208	0.981183	0.894953	0.897935	0.0344267	0.037836	0.988365	708.272
SOX11_HUMAN.H10MO.D	-2.07299	0.981287	0.786828	0.7899	0.0388559	0.0389447	0.980949	706.03
AJ_FOXO1::ELF1_002	-2.07618	0.981377	0.807372	0.809936	0.0298057	0.0324739	0.987907	708.043
TA0171_HSF1_full_trimer	-2.07429	0.981383	0.801701	0.805427	0.0493369	0.0471916	0.97626	705.042
MA0486.2 HSF1	-2.07429	0.981383	0.801701	0.805427	0.0493369	0.0471916	0.97626	705.042
HOMEO0130_Otp_3496.1	-2.07568	0.981397	0.792951	0.796626	0.0455467	0.0465302	0.982814	706.461
TA0481_ALX3_full_monomer	-2.07905	0.981539	0.901103	0.904623	0.0428302	0.044501	0.984402	706.856
MA0634.1 ALX3	-2.08212	0.981678	0.900926	0.904456	0.0428844	0.0445614	0.984533	706.859
TA0498_Barhl1_DBD_monomer	-2.0849	0.981838	0.912131	0.914431	0.0293262	0.0289917	0.980189	705.729
AJ_HOXB2::ELF1_005	-2.08561	0.98185	0.834408	0.837064	0.0329716	0.0334748	0.982693	706.318
AJ_HOXD12::ELK3_001	-2.08941	0.98192	0.783214	0.785743	0.0265792	0.0318448	0.99361	710.787
TA0295_TBX1_DBD_dimer	-2.08984	0.982017	0.727771	0.730382	0.0313171	0.0328434	0.985577	707.08
MA0708.1 MSX2	-2.09008	0.982074	0.910325	0.914338	0.0514168	0.0504497	0.979701	705.569
HOMEO0004_Bapx1_2343.1	-2.09623	0.982281	0.830075	0.83286	0.0324402	0.034934	0.987773	707.74
TA0626_MSX2_DBD_monomer	-2.09532	0.982305	0.910421	0.91444	0.0513877	0.0504051	0.979919	705.562
HOMEO0092_Lbx2_3869.2	-2.09684	0.982377	0.828243	0.831398	0.040591	0.0395256	0.979271	705.409
AJ_HOXB2::PITX1_001	-2.09888	0.982392	0.835909	0.838529	0.0301915	0.0328257	0.988519	707.988
NF2L2_HUMAN.H10MO.D	-2.1029	0.98259	0.847988	0.850945	0.035337	0.0369566	0.985854	707.013
TA0192_MEIS1_DBD_monomer	-2.09972	0.982602	0.981582	0.983235	0.0238791	0.0206617	0.965482	703.212
MA0498.2 MEIS1	-2.09972	0.982602	0.981582	0.983235	0.0238791	0.0206617	0.965482	703.212
AJ_HOXB2::ELK1_001	-2.10338	0.982611	0.785252	0.788141	0.0344984	0.0361133	0.985945	707.036
TA0743_RXRG_DBD_dimer	-2.10171	0.982627	0.783813	0.787171	0.0452385	0.0419655	0.97433	704.443
TA0195_MEIS3_DBD_monomer	-2.10549	0.98277	0.945289	0.947978	0.0352959	0.033542	0.977191	704.912
MA0775.1 MEIS3	-2.10549	0.98277	0.945289	0.947978	0.0352959	0.033542	0.977191	704.912
AJ_HOXB13::EOMES_001	-2.11138	0.983008	0.833424	0.836294	0.0369476	0.0357124	0.979233	705.255
TA0190_SRF_full_dimer	-2.11249	0.983068	0.740374	0.74364	0.042749	0.0406184	0.977531	704.909
MA0083.3 SRF	-2.11249	0.983068	0.740374	0.74364	0.042749	0.0406184	0.977531	704.909
TA0738_RXRA_DBD_dimer	-2.11287	0.983108	0.784185	0.787552	0.0454157	0.0418528	0.97419	704.319
AJ_HOXA3::PAX5	-2.11926	0.98326	0.745474	0.747804	0.0265515	0.0289045	0.989245	708.021
MA0515.1 Sox6	-2.12274	0.983465	0.922797	0.925882	0.0385466	0.0381964	0.982123	705.78
ZKSC3_HUMAN.H10MO.D	-2.13108	0.983777	0.852575	0.855805	0.0384539	0.0398476	0.986186	706.793
MA0721.1 UNCX	-2.13624	0.98402	0.927629	0.931532	0.0487873	0.0479992	0.982058	705.626
TA0434_FOXC1_DBD_dimer	-2.13807	0.98408	0.831585	0.835308	0.0455721	0.0457542	0.983913	706.068
TA0675_UNCX_DBD_monomer	-2.14024	0.98418	0.927533	0.93145	0.0489006	0.0480872	0.982186	705.616
TA0683_VSX1_full_monomer	-2.14506	0.984333	0.862036	0.86528	0.0380989	0.0397521	0.98719	706.957
AJ_HOXB2::PAX5_002	-2.14672	0.984404	0.75535	0.757669	0.0274765	0.0283865	0.986519	706.722
TA0740_RXRA_full_dimer	-2.14548	0.984435	0.777018	0.780511	0.0464223	0.0427535	0.975867	704.307
HME1_HUMAN.H10MO.D	-2.14795	0.984496	0.829674	0.833266	0.0454348	0.0439366	0.980974	705.265
MA0512.2 Rxra	-2.16109	0.985038	0.776601	0.780125	0.0465068	0.0428195	0.976639	704.302
AJ_SOX6::TBX21_002	-2.16071	0.985068	0.807892	0.810473	0.0360239	0.0313499	0.970045	703.307
AJ_IRF2	-2.16316	0.985101	0.901697	0.904201	0.0323092	0.0303993	0.979	704.715
TA0063_YY1_full_monomer	-2.16477	0.985122	0.891452	0.893908	0.0298983	0.0298165	0.984405	705.919
TA0157_GATA3_DBD_monomer	-2.16839	0.985197	0.93928	0.942199	0.0319344	0.0354024	0.991673	708.506
FOS_HUMAN.H10MO.A	-2.16633	0.985252	0.87541	0.878931	0.0473661	0.0426647	0.974482	703.901
TA0115_ELF4_full_monomer	-2.17049	0.985302	0.815519	0.819126	0.0414091	0.0436905	0.988788	707.228
MA0132.1 Pdx1	-2.17292	0.985447	0.969705	0.972591	0.0360818	0.0348869	0.982049	705.262
AJ_GCM2::SOX15_001	-2.17522	0.985516	0.782405	0.784826	0.0295053	0.0292398	0.984288	705.782
FOSL1_HUMAN.H10MO.A	-2.17684	0.985609	0.88019	0.883893	0.0474476	0.0446851	0.979732	704.734
AJ_POU2F1::TBX21_001	-2.17947	0.985653	0.774701	0.777407	0.031938	0.0326341	0.986843	706.465
AJ_POU2F1::ELK1_001	-2.18315	0.985763	0.804683	0.807407	0.030777	0.0328046	0.989814	707.48
MA0855.1 RXRB	-2.18252	0.985828	0.773448	0.777013	0.0462684	0.0429008	0.978433	704.434
AJ_CUX1::HOXB13	-2.18625	0.985881	0.771782	0.774911	0.0356811	0.0376222	0.989224	707.212
TA0742_RXRB_DBD_dimer	-2.18856	0.986045	0.773325	0.776903	0.0462785	0.0429371	0.978783	704.446
TEAD3_HUMAN.H10MO.D	-2.19223	0.986089	0.892958	0.89531	0.0264392	0.0282133	0.99014	707.509
MA0641.1 ELF4	-2.19492	0.98619	0.815762	0.819408	0.0413526	0.0436624	0.989566	707.246
ETS0022 h-Fli1	-2.19733	0.986269	0.881093	0.884207	0.0348408	0.0372549	0.990403	707.561
TA0159_GATA4_DBD_monomer	-2.19936	0.986327	0.945662	0.948578	0.0317576	0.0348595	0.991911	708.239
HOMEO0002_Alx4_1744.1	-2.19884	0.986394	0.800642	0.804246	0.0454947	0.043054	0.981179	704.829
MA0059.1 MAX::MYC	-2.20455	0.98652	0.847082	0.850804	0.0414713	0.0443855	0.990652	707.584
MEIS3_HUMAN.H10MO.D	-2.20375	0.986546	0.882283	0.885862	0.0437522	0.0426733	0.984063	705.443
GFI1B_HUMAN.H10MO.C	-2.20455	0.986578	0.865124	0.868336	0.0395204	0.0382823	0.983511	705.3
CEBPG_HUMAN.H10MO.C	-2.20987	0.986728	0.868838	0.871671	0.0329518	0.0336949	0.987904	706.482
HOMEO0096_Lhx4_1719.2	-2.20955	0.986736	0.79168	0.794852	0.0380679	0.037726	0.985575	705.782
MA0075.2 Prrx2	-2.21417	0.986883	0.930232	0.934072	0.0451903	0.0455792	0.987067	706.17
TA0662_PRRX2_full_monomer	-2.21431	0.986888	0.930186	0.934031	0.0452506	0.04563	0.987056	706.165
HOMEO0170_Tcf2_0913.2	-2.22128	0.987094	0.799179	0.80239	0.0358405	0.0380099	0.990566	707.355
TA0718_NR4A2_full_dimer	-2.22185	0.987125	0.723118	0.726364	0.0370522	0.0384065	0.989181	706.8
TA0142_FLI1_DBD_monomer	-2.22654	0.987238	0.887048	0.890365	0.0346401	0.0391857	0.993918	709.065
MEF2D_HUMAN.H10MO.C	-2.22628	0.987285	0.864727	0.868059	0.0388754	0.0393413	0.987703	706.245
AJ_FOXJ3::TBX21_001	-2.22841	0.987366	0.767742	0.770268	0.0299652	0.029782	0.986461	705.845
TA0193_MEIS2_DBD_dimer	-2.2286	0.98739	0.755982	0.759633	0.0446936	0.0430352	0.98394	705.177
TA0663_Prrx2_DBD_monomer	-2.22907	0.987392	0.921776	0.926014	0.0507189	0.0499553	0.985792	705.65
AJ_GCM1::FOXI1_002	-2.23012	0.987439	0.817355	0.820441	0.0376724	0.0363481	0.984169	705.218
TA0480_ALX3_DBD_monomer	-2.23183	0.987463	0.875636	0.879578	0.0455098	0.0464164	0.988416	706.423
LHX8_HUMAN.H10MO.D	-2.236	0.987599	0.801064	0.804399	0.0384986	0.0392021	0.988434	706.386
TA0774_ZBTB49_DBD_monomer	-2.23728	0.98768	0.765282	0.768061	0.0343357	0.0326299	0.983151	704.912
MA0491.1 JUND	-2.23783	0.987701	0.86984	0.873486	0.0452654	0.0427978	0.982725	704.811
TA0765_Tp53_DBD_dimer	-2.24223	0.987818	0.811261	0.814212	0.0351742	0.034578	0.986105	705.609
AJ_ETV2::GSC2_004	-2.24791	0.987933	0.790305	0.792911	0.0273251	0.0304931	0.993752	708.686
ETS0016 h-ETV3	-2.2496	0.987977	0.886456	0.889844	0.0347367	0.039611	0.994663	709.294
TA0831_SRY_DBD_dimer	-2.25025	0.988042	0.759551	0.763562	0.0451753	0.046855	0.990025	706.815
BU0049 Nr2f2_primary	-2.24911	0.988075	0.85597	0.859213	0.0411735	0.0378537	0.980615	704.275
AJ_MEIS1::ONECUT2	-2.25305	0.98815	0.775932	0.778942	0.0352168	0.0351099	0.987504	705.913
BU0001 Arid3a_primary	-2.25405	0.988191	0.82139	0.825028	0.0433322	0.0424097	0.986175	705.515
TA0840_Sox1_DBD_dimer	-2.25548	0.988227	0.781384	0.785186	0.0445994	0.0442961	0.987312	705.83
TA0485_Alx1_DBD_monomer	-2.25706	0.988261	0.888919	0.893002	0.0465669	0.0475531	0.989247	706.451
MA0511.1 RUNX2	-2.25659	0.988266	0.865893	0.86888	0.0352916	0.0347717	0.986763	705.657
TA0090_GRHL1_DBD_dimer	-2.2607	0.988364	0.834893	0.838419	0.0395236	0.0409926	0.990307	706.814
BU0040 Lef1_primary	-2.25859	0.988367	0.829862	0.833029	0.0399712	0.0368211	0.981207	704.312
TA0612_Lhx4_DBD_monomer	-2.26017	0.988379	0.918474	0.922072	0.0427304	0.0418269	0.986396	705.518
HOMEO0143_Pknox2_3077.2	-2.26109	0.988379	0.830831	0.833993	0.0356726	0.0367676	0.98994	706.667
ERG_HUMAN.H10MO.B	-2.26386	0.988384	0.816849	0.82074	0.0363299	0.0452218	0.99744	712.048
AJ_TEAD4::ERG_002	-2.26209	0.98839	0.810082	0.813331	0.0351278	0.0377663	0.992311	707.698
MA0704.1 Lhx4	-2.26222	0.988441	0.91854	0.922138	0.0427002	0.0417917	0.986455	705.515
AJ_HOXD4	-2.26874	0.988591	0.945042	0.946988	0.0210165	0.0225482	0.992356	707.646
AJ_TEAD4::SOX15_002	-2.26897	0.988605	0.827943	0.830411	0.0270114	0.0285962	0.991673	707.311
MA0766.1 GATA5	-2.27224	0.988683	0.94526	0.948287	0.0317581	0.0350398	0.993734	708.377
AJ_POU2F1::FOXO6_003	-2.27177	0.988699	0.767422	0.770374	0.0329857	0.0341533	0.990499	706.774
AJ_TEAD4::EOMES_001	-2.27209	0.988701	0.823286	0.826152	0.0315425	0.0331594	0.991369	707.139
MA0655.1 JDP2	-2.27098	0.988728	0.83714	0.841459	0.0531705	0.0499491	0.983467	704.685
TA0160_GATA5_DBD_monomer	-2.27566	0.988785	0.945279	0.948312	0.0317713	0.0350451	0.993788	708.37
TA0793_SOX14_DBD_dimer	-2.27638	0.988861	0.798184	0.801719	0.0414675	0.040804	0.987316	705.63
AJ_HOXB2::RFX5_002	-2.28029	0.988948	0.797	0.799925	0.0324466	0.0337189	0.990931	706.861
TA0409_JDP2_full_dimer	-2.28152	0.989038	0.837046	0.841386	0.0532514	0.0499692	0.983773	704.663
ZBED1_HUMAN.H10MO.D	-2.28678	0.989136	0.733008	0.736344	0.036846	0.0383416	0.991167	706.893
MA0764.1 ETV4	-2.28927	0.989189	0.879431	0.882754	0.0352312	0.0381659	0.993256	707.893
TA0135_ETV4_DBD_monomer	-2.28928	0.989189	0.879535	0.882855	0.0351932	0.0381274	0.99326	707.895
ZN232_HUMAN.H10MO.D	-2.29346	0.989336	0.727373	0.730602	0.0363395	0.0370098	0.990091	706.39
MA0143.3 Sox2	-2.29451	0.989358	0.911923	0.916836	0.0543823	0.0562904	0.991062	706.767
MA0854.1 Alx1	-2.29567	0.989409	0.806496	0.810356	0.0442524	0.044181	0.988901	705.944
AJ_TEAD4::HOXB13_002	-2.29629	0.989411	0.832968	0.836002	0.0337543	0.0347309	0.990768	706.627
TA0609_LMX1A_DBD_monomer	-2.29999	0.989547	0.893784	0.898324	0.0537281	0.0518613	0.986676	705.227
TA0860_NFIX_full_monomer	-2.30248	0.989575	0.964697	0.966972	0.0247607	0.0259717	0.991969	707.084
MA0702.1 LMX1A	-2.30423	0.989665	0.893742	0.898291	0.0537427	0.0518656	0.986801	705.223
TA0140_Elk3_DBD_monomer	-2.308	0.989694	0.840718	0.844959	0.0424669	0.0483378	0.995532	709.241
TA0512_DPRX_DBD_monomer	-2.30565	0.989703	0.856796	0.860118	0.0392053	0.0378593	0.986893	705.236
TA0146_GABPA_full_monomer	-2.30909	0.989731	0.862931	0.866792	0.0394343	0.0439676	0.994816	708.662
MA0161.1 NFIC	-2.31293	0.989892	0.981316	0.983255	0.0223809	0.0220352	0.98848	705.642
MA0749.1 ZBED1	-2.31422	0.989903	0.744556	0.747812	0.0357335	0.0369851	0.991537	706.765
TA0215_NFAT5_DBD_dimer	-2.31301	0.989906	0.810456	0.814042	0.0423709	0.0407214	0.986779	705.138
MA0132.2 PDX1	-2.31618	0.989975	0.940732	0.94448	0.042813	0.042516	0.989141	705.827
TA0650_PDX1_DBD_monomer	-2.31922	0.990056	0.940692	0.944449	0.042877	0.0425702	0.989212	705.822
HOMEO0031_En2_0952.1	-2.31993	0.990079	0.821934	0.82532	0.0389308	0.0383456	0.988713	705.651
BU0045 Myb_primary	-2.32523	0.990189	0.816012	0.81898	0.0319065	0.0335501	0.992597	707.145
AJ_GCM1::FOXO1_002	-2.32629	0.990203	0.813625	0.816437	0.0292324	0.0317893	0.99413	707.993
TA0315_TBX5_DBD_dimer	-2.32491	0.990208	0.726627	0.729753	0.0356593	0.035324	0.989227	705.773
AJ_ERF::PITX1_001	-2.32777	0.990232	0.812017	0.814634	0.0265253	0.0295728	0.995113	708.66
PDX1_HUMAN.H10MO.C	-2.32976	0.990295	0.877009	0.88125	0.0441835	0.0478647	0.994035	707.894
TA0066_ZBED1_DBD_dimer	-2.32972	0.990312	0.744654	0.747931	0.0356649	0.0369732	0.99198	706.803
AJ_ELK1::HOXB13_002	-2.33112	0.99033	0.839125	0.841859	0.0284063	0.0308295	0.994135	707.941
AJ_MEIS1::MAX	-2.33579	0.990443	0.772865	0.776032	0.0322307	0.0356486	0.994951	708.443
AJ_ETV2::TEF_001	-2.33525	0.990462	0.718414	0.720924	0.0276495	0.0282468	0.991327	706.461
HOMEZ_HUMAN.H10MO.D	-2.3345	0.990474	0.797138	0.800911	0.0444026	0.0424488	0.98708	705.031
TA0206_TGIF2_DBD_dimer	-2.337	0.990491	0.789359	0.793345	0.0423619	0.0448409	0.993157	707.308
MA0797.1 TGIF2	-2.337	0.990491	0.789359	0.793345	0.0423619	0.0448409	0.993157	707.308
TA0665_RAX_DBD_monomer	-2.33757	0.990548	0.905755	0.909783	0.0469133	0.0452608	0.987827	705.217
MA0146.2 Zfx	-2.34061	0.990589	0.87723	0.881614	0.0471628	0.0492338	0.99257	706.969
MA0718.1 RAX	-2.33986	0.990606	0.905629	0.909664	0.046955	0.0452948	0.987887	705.214
AJ_FOXJ2::PITX1_001	-2.34256	0.990645	0.826995	0.829959	0.0323575	0.0332624	0.991831	706.605
AJ_CLOCK::TBX3	-2.34358	0.990646	0.789995	0.793202	0.032956	0.0359869	0.994596	708.102
ZBT49_HUMAN.H10MO.D	-2.34298	0.990675	0.895261	0.898773	0.0399477	0.0393831	0.989423	705.67
TA0500_Barhl1_DBD_dimer	-2.34442	0.990697	0.826373	0.829966	0.0396074	0.0402787	0.991295	706.356
ETS0007 h-Elk1	-2.35026	0.990795	0.871344	0.87524	0.0379446	0.0436088	0.996399	709.52
MA0042.2 FOXI1	-2.35321	0.990911	0.922175	0.926463	0.0466238	0.0478916	0.992032	706.587
TF2LX_HUMAN.H10MO.D	-2.35258	0.990916	0.823512	0.826422	0.0331184	0.0324912	0.989376	705.566
AJ_ETV2::HOXA2_001	-2.35434	0.990936	0.806409	0.809323	0.031494	0.0325389	0.992352	706.723
MA0647.1 GRHL1	-2.35464	0.990941	0.811672	0.815416	0.0401592	0.0417962	0.992718	706.897
TA0563_HOXB5_DBD_monomer	-2.35402	0.990955	0.95079	0.953224	0.0278773	0.0271642	0.98898	705.423
HU0009_ZNF528	-2.35878	0.991026	0.795967	0.799457	0.0359342	0.0388978	0.994511	707.874
HOMEO0105_Meox1_2310.2	-2.35742	0.991031	0.817113	0.820303	0.0359939	0.0355585	0.989939	705.714
TA0091_GRHL1_full_dimer	-2.35902	0.991047	0.811865	0.815611	0.0401046	0.0417456	0.992816	706.9
AJ_CEBPG::ATF4	-2.35833	0.991053	0.803775	0.807519	0.0421728	0.0417186	0.990044	705.743
TA0294_TBX19_DBD_dimer	-2.36256	0.99112	0.734323	0.737475	0.0325848	0.0350811	0.994361	707.734
MA0804.1 TBX19	-2.36256	0.99112	0.734323	0.737475	0.0325848	0.0350811	0.994361	707.734
HOMEO0010_Cart1_0997.1	-2.36746	0.991269	0.807488	0.811437	0.0439942	0.0438293	0.990695	705.897
AJ_HOXB2::PAX1_001	-2.36898	0.991271	0.772845	0.775644	0.0286915	0.0310664	0.994692	707.881
HOMEO0142_Pknox1_2364.2	-2.36696	0.991285	0.812613	0.81601	0.0401445	0.0376872	0.986777	704.672
MA0258.1 ESR2	-2.36898	0.991295	0.826335	0.829025	0.0292619	0.0298513	0.992027	706.428
AJ_TEAD4::ETV1	-2.36973	0.991309	0.853787	0.856645	0.0307898	0.0317009	0.992508	706.642
GBX2_HUMAN.H10MO.D	-2.36986	0.991326	0.83435	0.838289	0.0438736	0.0436715	0.990705	705.878
P53_HUMAN.H10MO.B	-2.3722	0.991364	0.775413	0.778345	0.0313745	0.0324931	0.992844	706.78
MA0146.1 Zfx	-2.37479	0.991422	0.877319	0.881753	0.0470631	0.049083	0.993223	706.946
TA0508_DLX5_FL_monomer	-2.37336	0.991423	0.938721	0.943559	0.055565	0.0535503	0.988802	705.195
TA0445_FOXI1_full_monomer	-2.37508	0.991436	0.922085	0.926417	0.0467243	0.0479337	0.992443	706.557
MA0761.1 ETV1	-2.37741	0.991464	0.873456	0.877165	0.0373568	0.0410254	0.995338	708.252
GBX1_HUMAN.H10MO.D	-2.37983	0.991555	0.849708	0.854087	0.0481353	0.0483542	0.991456	706.08
MA0477.1 FOSL1	-2.37946	0.991589	0.874289	0.878237	0.0474972	0.0435724	0.98542	704.234
MA0035.2 Gata1	-2.38303	0.991619	0.908207	0.9117	0.0375128	0.0385292	0.992668	706.585
TA0132_ETV1_DBD_monomer	-2.38624	0.991668	0.873262	0.876988	0.0374019	0.0410624	0.995456	708.244
AJ_FOXJ2::ELF1_001	-2.38855	0.991737	0.853363	0.856399	0.0318334	0.0334121	0.993767	707.1
AJ_CUX1::HOXA13_002	-2.39145	0.991808	0.791864	0.795219	0.0356708	0.0368762	0.993145	706.737
TA0534_GBX2_DBD_dimer	-2.39041	0.99183	0.773041	0.776866	0.045116	0.042025	0.98694	704.522
HOMEO0133_Pax4_3989.2	-2.3924	0.991853	0.81129	0.815279	0.0449238	0.0438096	0.990062	705.44
BU0046 Mybl1_primary	-2.39448	0.991866	0.812171	0.815252	0.0319358	0.0338274	0.994255	707.324
MA0076.2 ELK4	-2.4026	0.992009	0.882867	0.886709	0.0355026	0.0420743	0.997677	710.445
AJ_TEAD4::PITX1_002	-2.40706	0.992149	0.795588	0.798244	0.0278739	0.0290099	0.993741	706.896
AJ_TEAD4::DRGX_002	-2.40933	0.992192	0.807089	0.810694	0.0371657	0.0393332	0.994471	707.303
TA0766_Tp53_DBD_dimer	-2.41251	0.99231	0.775046	0.778396	0.0389814	0.0364709	0.987921	704.606
HOMEO0112_Nkx1-2_3214.1	-2.41451	0.992338	0.828623	0.831884	0.0366779	0.0354805	0.990138	705.272
FOSB_HUMAN.H10MO.C	-2.41581	0.992382	0.868768	0.872833	0.0474501	0.0441894	0.987695	704.517
JUND_HUMAN.H10MO.A	-2.41826	0.992424	0.864344	0.868195	0.0439299	0.0418327	0.98926	704.953
MIXL1_HUMAN.H10MO.D	-2.42529	0.992538	0.851823	0.856187	0.0458004	0.0473	0.993738	706.713
MA0002.2 RUNX1	-2.4327	0.992712	0.901818	0.904941	0.0346094	0.0337275	0.991012	705.425
TA0647_Otx1_DBD_dimer	-2.43359	0.992719	0.789889	0.793303	0.0368107	0.0368713	0.992483	706.016
HOMEO0060_Hoxb3_1720.2	-2.43843	0.992807	0.829933	0.833131	0.0335247	0.034475	0.993791	706.613
MA0258.2 ESR2	-2.44719	0.992955	0.844741	0.847965	0.0311271	0.0346534	0.996654	708.621
HXA9_HUMAN.H10MO.D	-2.44545	0.99297	0.830856	0.833955	0.0344096	0.0332891	0.9909	705.273
AJ_ETV5::HOXA2_003	-2.4474	0.99298	0.897026	0.900061	0.0312382	0.0325918	0.994536	706.956
HXD13_HUMAN.H10MO.D	-2.45002	0.993023	0.902925	0.905451	0.0254015	0.0271025	0.995396	707.506
HOMEO0165_Six3_1732.2	-2.45261	0.993105	0.785095	0.78857	0.0380739	0.0372243	0.991645	705.493
HOMEO0109_Msx2_3449.1	-2.45779	0.993202	0.799108	0.802771	0.039825	0.0391658	0.992065	705.618
TA0230_PAX5_DBD_monomer	-2.45878	0.993214	0.814162	0.816726	0.0273668	0.0273995	0.992967	706.006
BHE22_HUMAN.H10MO.D	-2.45628	0.99322	0.79696	0.801412	0.0540501	0.0475818	0.984703	703.501
AJ_ARNTL::PITX1_001	-2.46864	0.993344	0.777826	0.781932	0.0363044	0.0437688	0.998448	710.986
TA0841_Sox1_DBD_dimer	-2.46839	0.993406	0.793547	0.797707	0.0456028	0.0442677	0.991611	705.344
RX_HUMAN.H10MO.D	-2.47003	0.993429	0.877729	0.882457	0.0507005	0.0503044	0.992757	705.808
TA0546_HMX2_DBD_monomer	-2.48203	0.993648	0.882131	0.885649	0.0375612	0.0372472	0.992965	705.796
MA0018.2 CREB1	-2.48708	0.993728	0.911461	0.914694	0.0335043	0.0341735	0.994286	706.424
BU0020 Gabpa_primary	-2.49761	0.993885	0.817604	0.821418	0.0358892	0.0401565	0.997291	708.759
TA0494_BARHL2_full_dimer	-2.49862	0.993939	0.810918	0.814859	0.0418033	0.0414485	0.993273	705.793
AJ_CUX1::RFX5_001	-2.50067	0.993979	0.746298	0.749348	0.0327655	0.0320456	0.992667	705.5
HOMEO0131_Otx1_2325.1	-2.5008	0.993982	0.825286	0.828733	0.0371096	0.0362098	0.992556	705.451
TA0858_NFIA_full_monomer	-2.51098	0.994143	0.910837	0.917032	0.0642326	0.0648377	0.994258	706.188
MA0670.1 NFIA	-2.51371	0.994189	0.91089	0.917095	0.0642578	0.0648653	0.994304	706.189
TA0122_ELK4_DBD_monomer	-2.52388	0.994319	0.872471	0.876563	0.0370615	0.0426492	0.998064	709.558
TA0717_NR4A2_full_dimer	-2.52346	0.994363	0.769144	0.772878	0.0402522	0.0388658	0.99249	705.233
HOMEO0137_Phox2a_3947.1	-2.52652	0.994402	0.820344	0.824693	0.0454591	0.0452275	0.993918	705.867
AJ_TEAD4::DLX2_004	-2.528	0.994426	0.830712	0.834259	0.0370913	0.0368704	0.993907	705.848
MA0063.1 Nkx2-5	-2.53502	0.994544	0.96688	0.969309	0.0258289	0.0251764	0.993164	705.43
TA0832_Sox10_DBD_dimer	-2.53651	0.994555	0.727045	0.731336	0.0438831	0.0444692	0.994811	706.276
SOX8_HUMAN.H10MO.D	-2.53869	0.994582	0.808126	0.811566	0.0342938	0.0356248	0.995709	706.852
TA0545_HMX1_DBD_monomer	-2.54064	0.994627	0.891824	0.895512	0.0386155	0.038144	0.993854	705.712
MA0893.1 GSX2	-2.54099	0.99463	0.914893	0.918564	0.0381646	0.0379646	0.994154	705.864
TA0527_ESX1_DBD_monomer	-2.54306	0.994654	0.908889	0.912903	0.0406164	0.0414809	0.995191	706.454
MA0612.1 EMX1	-2.54372	0.994659	0.906817	0.910811	0.0396505	0.0412734	0.995839	706.9
MA0490.1 JUNB	-2.54308	0.994683	0.878243	0.882545	0.0474763	0.044426	0.991262	704.609
ELK1_HUMAN.H10MO.A	-2.55229	0.994777	0.91261	0.915815	0.0302627	0.0330234	0.997221	708.084
TA0539_GSX2_DBD_monomer	-2.55129	0.994788	0.914937	0.918622	0.0381592	0.0379519	0.994313	705.86
HXD8_HUMAN.H10MO.D	-2.5536	0.994806	0.901375	0.904578	0.0312724	0.0329727	0.996345	707.211
TA0133_ETV2_DBD_monomer	-2.55606	0.994816	0.84601	0.849796	0.033122	0.0389726	0.998602	710.223
CREB1_HUMAN.H10MO.A	-2.55908	0.994906	0.868937	0.872714	0.0392541	0.0387767	0.994163	705.713
MA0762.1 ETV2	-2.56269	0.994915	0.845993	0.84979	0.0331395	0.0389756	0.998631	710.21
TA0805_SOX2_DBD_dimer	-2.56184	0.994927	0.763196	0.767545	0.0420983	0.0446326	0.996591	707.347
MA0140.2 GATA1::TAL1	-2.5625	0.994943	0.820467	0.824197	0.0369774	0.0382626	0.995887	706.759
MA0716.1 PRRX1	-2.56284	0.99496	0.925007	0.929792	0.0494191	0.0490642	0.994426	705.822
NANOG_HUMAN.H10MO.A	-2.56492	0.995009	0.816211	0.819697	0.0382508	0.0356951	0.991586	704.556
MA0618.1 LBX1	-2.56717	0.995015	0.915692	0.919828	0.0415544	0.0423492	0.99545	706.405
TA0659_PRRX1_DBD_monomer	-2.56707	0.995021	0.92519	0.929977	0.0493764	0.049008	0.994481	705.816
AJ_TEAD4::DLX2_001	-2.57125	0.995072	0.829533	0.832807	0.032615	0.0334659	0.995729	706.562
TA0407_JDP2_DBD_dimer	-2.57118	0.995103	0.840411	0.845176	0.0527273	0.0486706	0.991124	704.35
TA0119_ELK1_full_monomer	-2.57855	0.995149	0.842185	0.846899	0.0418836	0.0480853	0.998379	709.489
TA0187_MEF2B_full_dimer	-2.58206	0.995237	0.815908	0.82047	0.0473114	0.0464176	0.994255	705.567
MA0660.1 MEF2B	-2.58206	0.995237	0.815908	0.82047	0.0473114	0.0464176	0.994255	705.567
MA0150.2 Nfe2l2	-2.58718	0.995295	0.796306	0.800186	0.0383869	0.03942	0.995954	706.581
AJ_HOXB13::ETV1	-2.59127	0.995329	0.818891	0.821934	0.0273423	0.0308792	0.998199	709.019
TA0313_TBX4_DBD_dimer	-2.59414	0.995392	0.741266	0.744775	0.0349111	0.0355457	0.99577	706.384
TA0510_DMBX1_DBD_monomer	-2.60051	0.995476	0.911991	0.915746	0.0370327	0.0379528	0.996052	706.534
SOX7_HUMAN.H10MO.D	-2.6	0.995478	0.765518	0.769737	0.0429438	0.0426391	0.994986	705.824
STAT1_HUMAN.H10MO.A	-2.60495	0.995522	0.771298	0.774563	0.0304758	0.0329593	0.997484	707.85
AJ_POU2F1::FOXO6_002	-2.60517	0.995544	0.752534	0.755642	0.031355	0.0313433	0.995299	705.971
MITF_HUMAN.H10MO.C	-2.61035	0.995612	0.917411	0.920898	0.0351902	0.035106	0.995299	705.927
DLX4_HUMAN.H10MO.D	-2.61629	0.995695	0.840905	0.845817	0.0507322	0.0493255	0.994428	705.377
AJ_TEAD4::TBX21_002	-2.6169	0.995696	0.792493	0.795547	0.0308337	0.030673	0.995289	705.865
TA0769_GMEB2_DBD_dimer	-2.6218	0.995734	0.855687	0.859899	0.038282	0.0422549	0.998011	708.388
HOMEO0020_Dlx1_1741.2	-2.62105	0.995747	0.834668	0.83948	0.0481874	0.0482454	0.995563	706.006
FOXI1_HUMAN.H10MO.B	-2.6226	0.995766	0.852236	0.856908	0.0466153	0.0468143	0.995684	706.074
ETS0013 h-ETS2	-2.62743	0.995806	0.898113	0.901677	0.032596	0.0356648	0.997891	708.154
AJ_POU2F1::EOMES_005	-2.63535	0.995913	0.736668	0.739308	0.0251925	0.0263359	0.996972	707.003
MA0150.1 NFE2L2	-2.64003	0.995994	0.861663	0.865736	0.0427839	0.0405283	0.99373	704.848
MA0862.1 GMEB2	-2.64374	0.996002	0.85587	0.86011	0.038226	0.0421691	0.998148	708.373
BU0079 Sry_primary	-2.64982	0.996108	0.813321	0.818901	0.0582293	0.0553174	0.994011	704.905
[truncated: 1,043 more rows]

## Sheet: Cluster3
MATRIX_ID	Z_SCORE	P_VALUE	SAMPLE_AVERAGE	BACKGROUND_AVERAGE	SAMPLE_STDDEV	BACKGROUND_STDDEV	P_WELCH	df_WELCH
AJ_TFAP2C::E2F8	16.8854	6.9192e-66	0.818598	0.80295	0.0439351	0.0463083	4.62976e-67	2728.38
SP4_HUMAN.H10MO.D	16.5335	3.94804e-63	0.806911	0.783389	0.0646931	0.0711649	1.72489e-69	2743.56
KLF4_HUMAN.H10MO.A	16.4083	4.27076e-62	0.958773	0.943922	0.0394857	0.0453156	9.44849e-74	2760
TFDP1_HUMAN.H10MO.D	16.3758	5.31675e-62	0.85382	0.834287	0.0547873	0.0596494	4.56997e-67	2739.77
BU0039 Klf7_primary	16.2679	3.46134e-61	0.886568	0.871771	0.0413763	0.045496	2.09015e-67	2743.4
HU0012_KLF14	16.1587	2.3424e-60	0.947604	0.931871	0.0436468	0.0487185	2.45383e-68	2749.06
MA0039.2 Klf4	16.1585	2.3497e-60	0.947607	0.931875	0.0436455	0.0487174	2.45667e-68	2749.06
HU0017_KLF10	16.1581	2.37208e-60	0.947675	0.931959	0.0435896	0.0486678	2.30603e-68	2749.16
SP2_HUMAN.H10MO.C	16.0345	1.59145e-59	0.835713	0.815681	0.057241	0.0624817	8.17362e-65	2740.71
MA0516.1 SP2	15.8714	2.47981e-58	0.906967	0.89151	0.0441264	0.0487201	6.95415e-65	2744.94
SP1_HUMAN.H10MO.S	15.684	4.98105e-57	0.920798	0.902886	0.052071	0.0571243	8.82316e-63	2742.55
SP1_HUMAN.H10MO.C	15.4904	9.48023e-56	0.858945	0.840399	0.0560055	0.0598488	1.26434e-58	2733.12
KLF14_HUMAN.H10MO.D	15.3987	3.69068e-55	0.873211	0.856596	0.0512806	0.053914	2.2947e-56	2727.52
TA0059_SP1_DBD_monomer	15.3685	8.18894e-55	0.950681	0.937894	0.037509	0.0416273	1.04684e-61	2746.87
TA0322_TFAP2A_DBD_dimer	15.3386	1.13338e-54	0.911115	0.899138	0.0360929	0.0390424	8.32865e-59	2737.43
MA0810.1 TFAP2A.var.2	15.3329	1.2412e-54	0.911037	0.899051	0.0361295	0.0390855	8.94665e-59	2737.47
TA0334_Tcfap2a_DBD_dimer	15.3251	1.3243e-54	0.900906	0.88849	0.0378072	0.0405016	9.98979e-58	2733.99
TA0053_KLF16_DBD_monomer	15.1839	1.37604e-53	0.917041	0.902198	0.0446672	0.0488953	6.30772e-59	2741.75
MA0741.1 KLF16	15.1829	1.3979e-53	0.91691	0.902049	0.0447241	0.0489551	6.49537e-59	2741.73
MA0599.1 KLF5	15.1541	3.11676e-53	0.965396	0.952801	0.0355526	0.0416312	5.20526e-66	2768.32
MA0746.1 SP3	15.1303	3.20389e-53	0.928302	0.914963	0.0402172	0.044096	1.0365e-58	2742.35
TA0060_SP3_DBD_monomer	15.1298	3.22799e-53	0.92817	0.914819	0.0402558	0.0441383	1.04476e-58	2742.35
SP3_HUMAN.H10MO.B	15.0622	9.69658e-53	0.85459	0.836158	0.0553157	0.0612187	3.5347e-59	2745.82
MBD2_HUMAN.H10MO.B	15.0388	9.86378e-53	0.904434	0.886559	0.0569997	0.0593748	4.20661e-53	2724.42
ZFX_HUMAN.H10MO.C	14.9184	6.63082e-52	0.860048	0.845102	0.0476784	0.0500583	4.78745e-53	2727.06
MA0003.1 TFAP2A	14.9257	1.1964e-51	0.973737	0.964534	0.0256788	0.0309015	2.61298e-67	2780.19
AP2B_HUMAN.H10MO.B	14.7086	1.89971e-50	0.939898	0.929304	0.0333831	0.036013	3.51212e-54	2736.46
TA0052_KLF14_DBD_monomer	14.4881	4.35645e-49	0.856479	0.842548	0.0460407	0.0480336	1.03532e-49	2724.94
MA0740.1 KLF14	14.4841	4.61565e-49	0.856691	0.842785	0.0459873	0.0479613	1.17539e-49	2724.82
MA0079.2 SP1	14.4757	7.2047e-49	0.95725	0.944799	0.0388291	0.0430327	3.85145e-55	2746.35
MAZ_HUMAN.H10MO.A	14.4719	7.57776e-49	0.834302	0.815008	0.0602547	0.0666971	5.34583e-55	2745.89
MA0079.3 SP1	14.4472	1.25181e-48	0.945187	0.932034	0.0400434	0.0455768	1.50538e-57	2756.67
TA0863_TFAP2A_DBD_dimer	14.3102	6.45572e-48	0.895354	0.884014	0.0375757	0.0395972	1.89191e-49	2728.31
KLF6_HUMAN.H10MO.D	14.3209	8.51897e-48	0.972903	0.96394	0.0272214	0.0313403	9.09444e-58	2761.3
MA0811.1 TFAP2B	14.1532	6.41573e-47	0.897523	0.886592	0.0366759	0.0385929	2.47711e-48	2727.81
TA0325_TFAP2B_DBD_dimer	14.1388	7.9066e-47	0.897612	0.886698	0.0366639	0.0385717	3.18618e-48	2727.74
THAP1_HUMAN.H10MO.D	14.1386	8.02526e-47	0.784983	0.771927	0.0437601	0.0461439	2.03974e-48	2728.52
EGR1_HUMAN.H10MO.S	14.1406	8.30372e-47	0.895222	0.879402	0.0523782	0.0559192	1.74262e-49	2732.79
MA0470.1 E2F4	14.0479	3.22097e-46	0.904347	0.889697	0.048733	0.0521265	4.7319e-49	2733.45
BU0101 Zic1_primary	14.0498	3.32041e-46	0.801036	0.786842	0.0466919	0.0505152	4.79025e-50	2737.49
TA0331_TFAP2C_full_dimer	13.9956	6.05257e-46	0.898266	0.888225	0.0343377	0.0358403	1.10969e-46	2725.09
BU0076 Sp4_primary	13.9582	1.18837e-45	0.876365	0.86189	0.0483634	0.0518408	1.17889e-48	2734.2
TA0328_TFAP2C_DBD_dimer	13.8795	3.35905e-45	0.893438	0.882711	0.0366865	0.0386177	1.18247e-46	2727.93
MA0524.2 TFAP2C	13.8627	4.26788e-45	0.893566	0.882866	0.0366377	0.0385688	1.48288e-46	2727.95
BU0103 Zic3_primary	13.8185	8.91501e-45	0.790687	0.777638	0.0438889	0.0472074	4.74103e-48	2735.42
AJ_E2F3::HES7	13.7699	1.4225e-44	0.783346	0.769173	0.0499846	0.0513996	3.834e-44	2720.19
WT1_HUMAN.H10MO.D	13.7417	3.05708e-44	0.895026	0.88066	0.0471568	0.0523029	3.59864e-50	2746.64
MA0747.1 SP8	13.7026	4.37623e-44	0.910405	0.899452	0.0375526	0.039951	2.05013e-46	2731.57
TA0062_SP8_DBD_monomer	13.7004	4.51419e-44	0.910403	0.899454	0.0375486	0.0399428	2.15585e-46	2731.54
TA0087_Zic3_DBD_monomer	13.6789	5.44365e-44	0.811566	0.800691	0.0382221	0.0397117	2.13133e-44	2723.56
PURA_HUMAN.H10MO.D	13.6153	1.71127e-43	0.911361	0.903449	0.0265453	0.0290666	3.11551e-48	2741.86
KLF1_HUMAN.H10MO.C	13.5913	1.97486e-43	0.908736	0.896683	0.0421626	0.0443111	9.23664e-45	2727.39
AJ_GCM1::ERG	13.5702	3.02358e-43	0.842203	0.832134	0.0343389	0.0370987	7.86439e-47	2736.99
MA0024.2 E2F1	13.5545	3.18187e-43	0.921292	0.908179	0.0463481	0.0483265	6.26373e-44	2724.74
AJ_E2F1::HES7_001	13.5421	3.56876e-43	0.767434	0.754533	0.0461651	0.0475748	5.7094e-43	2720.89
BU0086 Tcfap2b_primary	13.4103	2.16691e-42	0.863533	0.853259	0.0373588	0.0382567	9.66964e-42	2718.85
HU0034_ZNF692	13.3588	4.93376e-42	0.854434	0.841601	0.0458041	0.0479934	3.90569e-43	2726.38
KLF15_HUMAN.H10MO.D	13.3606	5.68873e-42	0.908606	0.899171	0.0324885	0.0353153	5.38107e-46	2739.19
BU0052 Plagl1_primary	13.3126	9.55755e-42	0.84458	0.831794	0.0455576	0.0479921	2.90809e-43	2728.19
ZN148_HUMAN.H10MO.D	13.2289	3.58667e-41	0.898963	0.883086	0.0547572	0.0600306	7.73307e-46	2742.3
AJ_GCM1::ELK3_002	13.1609	7.02092e-41	0.78803	0.777319	0.0392418	0.0406508	3.85165e-41	2722.59
AJ_TFAP2C::ELK1	13.1613	7.37954e-41	0.793665	0.782824	0.0392564	0.0411566	5.19558e-42	2726.57
GN_KLF5_TOP5000	13.1333	1.72344e-40	0.953867	0.944675	0.0298225	0.0350607	4.43868e-51	2770.01
MA0751.1 ZIC4	13.0833	1.86942e-40	0.84086	0.831227	0.0360333	0.0367625	1.245e-39	2717.67
TA0072_ZIC4_DBD_monomer	13.0796	1.96548e-40	0.840801	0.831164	0.0360604	0.0367876	1.3202e-39	2717.65
BU0102 Zic2_primary	13.0953	2.04114e-40	0.786928	0.774399	0.044379	0.0478362	1.10545e-43	2736.17
AJ_E2F1::NHLH1	13.0935	2.23796e-40	0.767715	0.756707	0.0383847	0.0420463	6.50781e-45	2742
TA0061_SP4_full_monomer	13.062	2.55207e-40	0.830694	0.81746	0.0493446	0.0505902	7.51494e-40	2719.23
MA0685.1 SP4	13.06	2.62011e-40	0.830542	0.817301	0.0493834	0.0506218	7.91591e-40	2719.18
TBX15_HUMAN.H10MO.D	13.0859	2.68477e-40	0.826626	0.808798	0.0610291	0.06817	2.03687e-46	2749.34
AJ_GCM1::ELK1_002	13.0597	2.9479e-40	0.827226	0.816718	0.0382641	0.0402021	1.43338e-41	2727.29
AJ_TFAP2C::MAX_004	13.0107	5.0937e-40	0.771099	0.76089	0.038219	0.0391821	1.46663e-39	2719.22
E2F3_HUMAN.H10MO.B	13.0183	5.54593e-40	0.898415	0.887345	0.0397685	0.0425072	1.39159e-42	2733.2
AJ_ETV5::HES7_001	12.9948	6.09952e-40	0.826293	0.814962	0.0427589	0.0435311	5.38997e-39	2716.99
TA0335_Tcfap2a_DBD_dimer	12.9998	7.35995e-40	0.910657	0.899528	0.0397262	0.0427999	4.62539e-43	2736
AJ_E2F1::EOMES_001	12.9537	1.43451e-39	0.77047	0.761614	0.0313448	0.0341889	1.04166e-43	2740.44
AJ_E2F3::FOXI1	12.9299	1.63984e-39	0.789957	0.779104	0.0401303	0.041934	1.98385e-40	2725.47
AJ_GCM1::ETV1	12.9337	1.72711e-39	0.850899	0.841058	0.0355557	0.0380328	3.95145e-42	2733.46
MA0493.1 Klf1	12.9102	2.19162e-39	0.911271	0.901	0.0378126	0.0397507	9.69824e-41	2727.49
HIF1A_HUMAN.H10MO.A	12.9165	2.22773e-39	0.8698	0.857454	0.0444075	0.0477871	1.81436e-42	2735.58
AJ_TFAP2C::ETV7	12.8711	3.13288e-39	0.79172	0.783355	0.0319919	0.0324421	4.69529e-38	2715.75
MA0003.3 TFAP2A	12.8037	9.89634e-39	0.912178	0.90162	0.0383437	0.0412253	1.00652e-41	2735.26
TA0323_TFAP2A_DBD_dimer	12.7945	1.1174e-38	0.912102	0.901554	0.0383418	0.0412164	1.17524e-41	2735.21
E2F6_HUMAN.H10MO.C	12.7955	1.17744e-38	0.90804	0.897601	0.0373414	0.0408018	7.30336e-43	2741.08
AJ_ETV5::HES7_002	12.7746	1.25289e-38	0.828593	0.817975	0.0399891	0.0415171	4.25084e-39	2723.32
AJ_TFAP2C::HES7_001	12.7799	1.28192e-38	0.790339	0.779375	0.0404191	0.0428765	1.27824e-40	2730.57
MA0742.1 Klf12	12.7501	1.65319e-38	0.85153	0.840545	0.0418589	0.0430235	2.75825e-38	2720.04
TA0054_Klf12_DBD_monomer	12.7434	1.80725e-38	0.851598	0.84062	0.0418553	0.0430165	3.04227e-38	2720.02
AJ_GCM1::ELF1_001	12.7324	2.39706e-38	0.840726	0.831604	0.0337427	0.0358047	2.30747e-40	2730.67
MA0162.2 EGR1	12.7279	2.6361e-38	0.906206	0.89392	0.0450804	0.0482535	5.9404e-41	2733.7
AJ_GCM1::ELK1_003	12.5983	1.27282e-37	0.820564	0.810318	0.0390505	0.0406241	3.02777e-38	2723.98
TA0070_ZIC1_full_monomer	12.5742	1.70254e-37	0.812562	0.80242	0.038936	0.0402855	9.41122e-38	2722.2
AJ_E2F1::ELK1_002	12.5749	1.86947e-37	0.784387	0.774108	0.0385222	0.040852	2.07616e-39	2730.47
TA0326_TFAP2B_DBD_dimer	12.5716	1.94997e-37	0.897141	0.885826	0.0424214	0.0449833	2.19667e-39	2730.44
MA0696.1 ZIC1	12.554	2.21202e-37	0.81256	0.80244	0.0389132	0.0402634	1.20872e-37	2722.21
MA0812.1 TFAP2B.var.2	12.5592	2.28513e-37	0.897009	0.885697	0.0424754	0.0450119	2.86348e-39	2730.22
MA0697.1 ZIC3	12.527	3.091e-37	0.820243	0.810406	0.038032	0.0392142	2.87069e-37	2721.07
TA0071_ZIC3_full_monomer	12.5248	3.17898e-37	0.820293	0.810458	0.0380359	0.0392151	2.98674e-37	2721.04
TA0047_HINFP1_full_dimer	12.4976	5.19569e-37	0.703092	0.690594	0.046888	0.0499868	2.5281e-39	2732.29
MA0632.1 Tcfl5	12.4866	7.31878e-37	0.932076	0.919893	0.0434347	0.048826	4.73697e-43	2751.78
KLF16_HUMAN.H10MO.D	12.4677	8.5234e-37	0.842555	0.826591	0.058375	0.0640446	3.73586e-41	2742.58
EGR1_HUMAN.H10MO.A	12.4298	1.08316e-36	0.881227	0.870173	0.0430748	0.044412	9.77545e-37	2721.05
AJ_TFAP2C::MAX_003	12.4097	1.53156e-36	0.771767	0.762306	0.0361601	0.0380959	5.0145e-38	2728.22
AJ_TFAP2C::MAX_002	12.3689	2.81191e-36	0.782107	0.772497	0.0360755	0.0388428	2.9745e-39	2735.78
ARNT2_HUMAN.H10MO.D	12.3604	3.05328e-36	0.915812	0.908496	0.0276687	0.0295875	9.72285e-39	2733.36
TA0037_EGR3_DBD_monomer	12.3286	4.06422e-36	0.819013	0.806859	0.04744	0.0492433	1.29288e-36	2723.26
MA0131.2 HINFP	12.3223	4.58695e-36	0.852763	0.841118	0.0450305	0.0472148	3.17106e-37	2726.61
KLF13_HUMAN.H10MO.D	12.3245	4.63312e-36	0.912318	0.898066	0.0545978	0.0577917	7.4264e-38	2729.83
MA0146.1 Zfx	12.3219	4.65578e-36	0.893858	0.881753	0.0467046	0.049083	2.26205e-37	2727.38
TA0046_HINFP1_full_monomer	12.3179	4.86166e-36	0.852857	0.841222	0.0449942	0.0471907	3.21377e-37	2726.7
MA0732.1 EGR3	12.3143	4.87804e-36	0.819176	0.807052	0.0473793	0.0491794	1.55145e-36	2723.25
TA0033_EGR1_DBD_monomer	12.2996	5.46081e-36	0.833751	0.822399	0.0451831	0.0460799	2.33934e-35	2717.55
BU0010 Egr1_primary	12.3068	6.04639e-36	0.854353	0.841743	0.0478786	0.0512177	1.86735e-38	2733.49
MA0146.2 Zfx	12.2792	8.01039e-36	0.893713	0.881614	0.0468424	0.0492338	3.83836e-37	2727.42
TA0324_TFAP2A_DBD_dimer	12.2719	1.03361e-35	0.885273	0.872805	0.0463386	0.0508175	6.07924e-40	2742.42
MA0469.1 E2F3	12.2504	1.32961e-35	0.880082	0.867709	0.0463032	0.0505129	1.87682e-39	2740.5
BU0008 E2F2_primary	12.2033	2.34244e-35	0.814006	0.800957	0.0493862	0.0534663	1.17128e-38	2737.73
TA0327_TFAP2B_DBD_dimer	12.1588	4.09967e-35	0.860905	0.849435	0.0435567	0.0471688	2.03213e-38	2737.84
MA0813.1 TFAP2B.var.3	12.1517	4.48248e-35	0.86085	0.849384	0.043569	0.0471781	2.26556e-38	2737.81
MA0815.1 TFAP2C.var.3	12.1461	4.8566e-35	0.853279	0.841326	0.0453119	0.04921	1.55176e-38	2738.87
TA0330_TFAP2C_DBD_dimer	12.1445	4.95124e-35	0.853251	0.841295	0.0453321	0.0492271	1.60841e-38	2738.83
MA0259.1 ARNT::HIF1A	12.1502	6.45262e-35	0.942147	0.930959	0.0383965	0.0461488	5.46052e-46	2779.64
HU0006_CTCF	11.9231	5.31654e-34	0.812796	0.800916	0.0504027	0.0496972	1.66674e-31	2707.19
TA0048_HINFP1_full_dimer	11.93	6.83636e-34	0.712528	0.700305	0.0476733	0.0512215	1.34828e-36	2735.03
ZIC4_HUMAN.H10MO.D	11.9123	8.25972e-34	0.808894	0.798993	0.0389729	0.0415409	5.38379e-36	2732.23
TA0862_TFAP2A_DBD_dimer	11.9063	8.97803e-34	0.899927	0.889564	0.0407114	0.0435078	3.9856e-36	2733.14
AJ_GCM1::SPDEF_005	11.8138	2.54164e-33	0.764108	0.755964	0.0330489	0.034438	4.36546e-34	2724.53
BU0009 E2F3_primary	11.8117	2.72899e-33	0.817132	0.804929	0.0489456	0.0516276	8.40631e-35	2728.63
AJ_ETV2::HES7_002	11.7263	6.65756e-33	0.763694	0.754772	0.0374447	0.0379824	4.28227e-32	2715.84
TBX1_HUMAN.H10MO.D	11.7344	7.26246e-33	0.810565	0.79795	0.0503949	0.0537357	4.88475e-35	2732.36
AJ_ETV2::HES7_001	11.6914	1.00775e-32	0.773801	0.764648	0.0386037	0.0390751	8.37298e-32	2715.18
MA0814.1 TFAP2C.var.2	11.6777	1.47407e-32	0.901546	0.891723	0.0391743	0.0420504	3.93696e-35	2734.69
TA0329_TFAP2C_DBD_dimer	11.6735	1.55151e-32	0.901739	0.891935	0.0391079	0.0419866	4.05078e-35	2734.76
GLIS2_HUMAN.H10MO.D	11.6578	1.66021e-32	0.807548	0.797958	0.0396069	0.041087	5.21848e-33	2723.05
MA0006.1 Ahr::Arnt	11.646	2.72757e-32	0.965377	0.954042	0.0421943	0.0487347	1.07487e-39	2762.61
MA0872.1 TFAP2A.var.3	11.6141	3.31391e-32	0.848591	0.83693	0.0461525	0.0502081	1.34715e-35	2739.48
TA0864_TFAP2A_DBD_dimer	11.6136	3.33106e-32	0.848576	0.836912	0.0461743	0.0502262	1.37712e-35	2739.44
KLF12_HUMAN.H10MO.D	11.5508	5.20843e-32	0.893494	0.883908	0.0414401	0.0414137	1.98216e-30	2711.24
EGR2_HUMAN.H10MO.C	11.5424	8.40407e-32	0.91044	0.898507	0.0464619	0.051725	1.2424e-36	2748.06
TA0771_Egr1_mouse	11.4937	1.12798e-31	0.854278	0.844299	0.0423443	0.0433507	1.94315e-31	2718.77
PROX1_HUMAN.H10MO.D	11.493	1.38909e-31	0.873878	0.866145	0.0310241	0.0336445	9.92928e-35	2738.35
TA0043_GLIS2_DBD_monomer	11.4586	1.72366e-31	0.822755	0.814119	0.0366913	0.0376349	2.29545e-31	2719.38
MA0736.1 GLIS2	11.4491	1.92916e-31	0.822904	0.814277	0.0366804	0.0376278	2.52531e-31	2719.42
PLAL1_HUMAN.H10MO.D	11.4366	2.43591e-31	0.898896	0.890201	0.0361526	0.0379906	1.36571e-32	2727.35
AJ_E2F1::EOMES_002	11.4348	2.5881e-31	0.777261	0.768408	0.0364029	0.0386926	3.12677e-33	2731.25
AJ_E2F1::ELK1_001	11.4227	2.75453e-31	0.77967	0.769795	0.0415844	0.0431815	7.42131e-32	2723.38
AJ_GCM1::FIGLA_002	11.4363	2.77673e-31	0.816996	0.80841	0.0343972	0.0375491	8.22893e-35	2740.74
TA0036_EGR2_full_monomer	11.3937	3.74392e-31	0.840753	0.830586	0.0433445	0.044561	3.6467e-31	2720.12
TA0336_Tcfap2a_DBD_dimer	11.324	1.00178e-30	0.857421	0.846375	0.0451838	0.048769	1.59712e-33	2736.65
GLIS3_HUMAN.H10MO.D	11.2109	2.92654e-30	0.916919	0.909151	0.0344264	0.0345768	4.59278e-29	2712.77
ZBT7A_HUMAN.H10MO.D	11.2063	3.63558e-30	0.88995	0.884673	0.0223467	0.023531	1.63959e-31	2728.05
AJ_E2F1::HES7_002	11.1962	4.49815e-30	0.774088	0.765044	0.0372269	0.0403946	3.88973e-33	2738.55
AJ_TFAP2C::HES7_002	11.1677	5.42146e-30	0.792383	0.782969	0.0405619	0.0421071	1.4946e-30	2723.28
BU0095 Zfp161_primary	11.148	5.8889e-30	0.80433	0.791421	0.0579928	0.0577746	2.28189e-28	2710.28
MA0162.1 Egr1	11.1574	6.30908e-30	0.886881	0.877674	0.0393169	0.0412289	4.88681e-31	2726.64
HEN1_HUMAN.H10MO.C	11.1324	7.47054e-30	0.798618	0.79048	0.0360473	0.0364903	4.37496e-29	2715.2
BU0088 Tcfap2e_primary	11.1207	1.0125e-29	0.877333	0.868409	0.0376702	0.0401115	1.11922e-31	2731.88
TA0039_Egr3_DBD_monomer	11.1057	1.03908e-29	0.796314	0.786456	0.0434968	0.044314	2.79871e-29	2717.22
AJ_TFAP2C::MAX_001	11.0347	2.4433e-29	0.792388	0.783745	0.0379295	0.0391132	1.50175e-29	2721.11
TA0332_TFAP2C_full_dimer	11.0339	2.64303e-29	0.836302	0.823827	0.0536297	0.0564956	1.18277e-30	2728.19
COE1_HUMAN.H10MO.A	10.8552	1.57646e-28	0.872263	0.864116	0.038149	0.0374292	2.50313e-26	2705.73
BU0027 Gmeb1_primary	10.8011	3.41409e-28	0.851061	0.843001	0.036181	0.0372653	2.3226e-28	2720.72
AJ_GCM1::FIGLA_007	10.8066	3.57023e-28	0.775436	0.767707	0.0335326	0.0357485	4.00293e-30	2732.29
PLAG1_HUMAN.H10MO.S	10.7912	4.25273e-28	0.915197	0.909566	0.0244431	0.0260814	4.31488e-30	2732.6
AJ_GCM1::SPDEF_002	10.763	5.30171e-28	0.748637	0.740915	0.0346299	0.0358365	2.07911e-28	2722.25
GLIS1_HUMAN.H10MO.D	10.7234	8.57449e-28	0.800931	0.791701	0.0410206	0.0430034	7.4398e-29	2726.55
BU0097 Zfp281_primary	10.7127	1.04058e-27	0.875209	0.861651	0.0588553	0.0632748	4.41882e-30	2735.24
TA0034_EGR1_full_monomer	10.6786	1.30415e-27	0.796995	0.787052	0.0454552	0.0464906	1.91019e-27	2718.46
MA0163.1 PLAG1	10.6347	1.97788e-27	0.838206	0.829495	0.0408276	0.0408738	2.93898e-26	2711.78
TF7L1_HUMAN.H10MO.D	10.6118	2.26154e-27	0.869037	0.863503	0.0268855	0.0260001	1.18982e-24	2701.56
ETV1_HUMAN.H10MO.B	10.6048	3.22018e-27	0.851347	0.843335	0.035843	0.0377516	1.66738e-28	2728.13
AJ_HES1	10.5875	4.09277e-27	0.861378	0.849392	0.0527976	0.0565942	2.71395e-29	2734.2
MA0615.1 Gmeb1	10.5189	7.63369e-27	0.854204	0.846543	0.0354181	0.036371	6.87972e-27	2719.75
MA0471.1 E2F6	10.5189	8.84784e-27	0.930788	0.92188	0.039191	0.042342	2.4141e-29	2737
AJ_GCM1::SPDEF_001	10.4904	1.03758e-26	0.840151	0.832535	0.0353448	0.0362534	1.05523e-26	2719.38
AJ_GCM1::FIGLA_005	10.4789	1.24856e-26	0.816091	0.808144	0.0362039	0.0378894	1.37822e-27	2725.98
MA0472.2 EGR2	10.4163	2.24861e-26	0.842421	0.833257	0.0432237	0.0439178	6.14351e-26	2716.37
TA0035_EGR2_DBD_monomer	10.3948	2.83734e-26	0.842381	0.833236	0.0432322	0.0439218	7.76905e-26	2716.34
TA0333_TFAP2C_full_dimer	10.3968	3.21717e-26	0.909722	0.90205	0.0345074	0.0368859	3.34124e-28	2733.22
ARNT_HUMAN.H10MO.B	10.3812	4.02722e-26	0.932165	0.920923	0.0496012	0.0541564	3.59015e-29	2740.81
AJ_E2F3::TBX21_003	10.3644	4.58819e-26	0.782298	0.774927	0.0331773	0.0355527	3.65707e-28	2734.1
AJ_GCM1::ETV4	10.3285	5.78461e-26	0.800653	0.793429	0.0343607	0.0349157	1.51141e-25	2716.4
AHR_HUMAN.H10MO.B	10.2514	1.66815e-25	0.897616	0.887816	0.0431684	0.0478246	3.10866e-29	2746.21
AJ_ERF::HES7_002	10.1946	1.96087e-25	0.770616	0.763791	0.0350398	0.0333575	2.52204e-22	2697.16
BU0085 Tcfap2a_primary	10.2081	2.46189e-25	0.885988	0.878999	0.0317409	0.034232	1.06678e-27	2736.36
ZN219_HUMAN.H10MO.D	10.1947	2.90707e-25	0.898931	0.88938	0.0430245	0.0468512	4.28478e-28	2739.84
TA0038_EGR4_DBD_monomer	10.1492	4.02658e-25	0.816486	0.808473	0.0383211	0.0394258	2.79553e-25	2720.36
MA0733.1 EGR4	10.1472	4.10937e-25	0.816288	0.808271	0.0383586	0.0394512	2.95162e-25	2720.25
ZN350_HUMAN.H10MO.C	10.0807	7.97464e-25	0.833935	0.828899	0.0245433	0.0249397	1.8989e-24	2716.4
AJ_GCM1::SPDEF_004	10.0677	9.12507e-25	0.770485	0.764169	0.0308302	0.0313166	2.24177e-24	2716.28
PAX5_HUMAN.H10MO.A	10.055	1.02447e-24	0.821955	0.81629	0.0278498	0.0281187	4.52918e-24	2714.39
AJ_GCM1::SPDEF_003	10.0335	1.36289e-24	0.761508	0.754979	0.0314921	0.0324995	6.84845e-25	2721.35
AJ_E2F3::FOXO6_001	9.97132	2.5099e-24	0.772871	0.766321	0.0321764	0.0327932	4.30645e-24	2717.34
AJ_GCM1::TBX21_001	9.97125	3.06947e-24	0.82437	0.816772	0.0346149	0.0381153	1.66636e-27	2743.93
MA1099.1 Hes1	9.93219	4.13836e-24	0.904139	0.895669	0.0403417	0.0426133	1.97457e-25	2729.12
AJ_GCM1::ETV7_001	9.86761	7.61401e-24	0.790752	0.784374	0.031189	0.0322866	2.79845e-24	2722.36
ZN740_HUMAN.H10MO.D	9.81962	1.39514e-23	0.897021	0.886726	0.0483643	0.0524223	4.90509e-26	2738.16
CXXC1_HUMAN.H10MO.D	9.80575	1.53784e-23	0.960531	0.955197	0.0255347	0.0271885	3.44736e-25	2731.86
AJ_ERF::HES7_001	9.7524	2.41688e-23	0.762444	0.755692	0.0336192	0.0345733	1.67025e-23	2720.22
TFAP4_HUMAN.H10MO.C	9.75657	2.46786e-23	0.895914	0.8872	0.0423458	0.0446306	1.57542e-24	2728.36
BU0087 Tcfap2c_primary	9.73117	3.3458e-23	0.876223	0.869346	0.0328696	0.0353283	3.0305e-25	2735.15
AJ_E2F3::FOXO6_002	9.70939	3.3647e-23	0.753586	0.74689	0.0347538	0.0344011	7.50188e-22	2708.35
MA0154.2 EBF1	9.65059	6.92807e-23	0.917091	0.909763	0.0364779	0.0379287	1.68452e-23	2723.82
TA0081_ZNF740_full_monomer	9.64611	8.04599e-23	0.88762	0.876133	0.0548356	0.0595485	2.73817e-25	2738.84
MA0003.2 TFAP2A	9.64085	8.34496e-23	0.857732	0.850097	0.0367168	0.0395984	5.73791e-25	2736.36
ZN524_HUMAN.H10MO.D	9.55442	1.81197e-22	0.774252	0.767139	0.0357171	0.0371891	3.91367e-23	2724.27
TA0042_GLIS1_DBD_monomer	9.5441	1.95386e-22	0.742975	0.7356	0.0374641	0.0385883	1.14521e-22	2720.73
MA0735.1 GLIS1	9.49978	3.028e-22	0.742479	0.73513	0.0375068	0.0386324	1.76941e-22	2720.73
AJ_GCM1::FIGLA_001	9.50047	3.24819e-22	0.82665	0.819523	0.0352617	0.0374985	9.74287e-24	2731.43
HU0024_ZNF574	9.4774	3.90447e-22	0.8213	0.81469	0.0333611	0.0348397	6.48038e-23	2725.27
AJ_ETV2::SREBF2_001	9.38673	8.83071e-22	0.806594	0.800794	0.0304123	0.0308446	1.9757e-21	2715.8
MA0105.1 NFKB1	9.36251	1.10867e-21	0.892537	0.884585	0.0419411	0.0423942	3.28204e-21	2714.74
TA0857_EGR4_DBD_monomer	9.34427	1.40397e-21	0.787684	0.780382	0.0376948	0.0390305	5.12413e-22	2722.44
NFKB1_HUMAN.H10MO.B	9.32547	1.58295e-21	0.875262	0.867588	0.0406961	0.041075	5.23525e-21	2714.28
AJ_GCM1::PITX1_003	9.25648	3.10349e-21	0.798631	0.792791	0.0311151	0.0314917	7.9296e-21	2715.15
AJ_GCM1::FIGLA_008	9.22642	4.24673e-21	0.79375	0.787205	0.034637	0.0354197	4.52647e-21	2718.41
TA0366_NHLH1_DBD_dimer	9.2199	4.80352e-21	0.880198	0.871908	0.0427971	0.0449247	5.34411e-22	2726.99
KAISO_HUMAN.H10MO.A	9.22294	5.16669e-21	0.794553	0.787646	0.034042	0.0374649	7.42395e-24	2743.73
MA0105.2 NFKB1	9.18876	5.55936e-21	0.857305	0.848866	0.0464873	0.0458064	1.20012e-19	2707
TFCP2_HUMAN.H10MO.D	9.18742	6.56572e-21	0.882595	0.877709	0.0252896	0.0265731	6.76433e-22	2727.33
BU0100 Zfp740_primary	9.17484	7.3324e-21	0.890353	0.880002	0.0538631	0.0563613	1.0914e-21	2725.92
MA0018.1 CREB1	9.12556	1.01402e-20	0.879958	0.872835	0.0395409	0.0389344	2.19898e-19	2706.79
MA0506.1 NRF1	9.13476	1.06006e-20	0.876849	0.866188	0.0560199	0.0582965	2.55512e-21	2724.09
AJ_GCM1::NHLH1_001	9.13154	1.07129e-20	0.80415	0.798028	0.0324613	0.033485	5.43803e-21	2721.21
E2F1_HUMAN.H10MO.A	9.12359	1.1485e-20	0.875854	0.869615	0.033191	0.0341508	7.21288e-21	2720.39
MA0104.2 Mycn	9.07193	1.70538e-20	0.884815	0.87686	0.0442169	0.0437436	2.46937e-19	2708.18
ZIC1_HUMAN.H10MO.B	9.05876	2.62165e-20	0.954334	0.949677	0.022543	0.0257333	1.40252e-24	2757.84
AJ_ETV2::HES7_003	9.02799	3.44123e-20	0.771011	0.763962	0.0345255	0.0390775	4.46543e-24	2754.46
AJ_FOXO1::ELK1_003	8.95131	5.03919e-20	0.813315	0.807029	0.0361031	0.035011	2.94057e-18	2702.35
AJ_GCM1::FIGLA_003	8.9549	6.02016e-20	0.817251	0.810499	0.0354174	0.0376825	2.33124e-21	2731.6
AJ_E2F3::TBX21_002	8.95056	6.03592e-20	0.749038	0.742332	0.0358157	0.0374313	1.05168e-20	2725.52
CTCF_HUMAN.H10MO.A	8.84461	1.32755e-19	0.813144	0.805715	0.0435513	0.0418635	1.29679e-17	2699.85
AJ_GCM1::FIGLA::010	8.85639	1.40403e-19	0.819693	0.813172	0.0356322	0.0367743	6.85565e-20	2721.37
ELF2_HUMAN.H10MO.C	8.84047	1.73667e-19	0.885373	0.879182	0.0328533	0.0350002	6.42753e-21	2732.05
TA0352_HEY2_DBD_dimer	8.83634	1.86533e-19	0.866814	0.858805	0.0418306	0.0453264	1.64719e-21	2738.05
AJ_GCM1::ELF1_003	8.80862	1.90931e-19	0.804964	0.799036	0.0344547	0.0335556	7.13294e-18	2703.58
ZN143_HUMAN.H10MO.A	8.74021	2.95373e-19	0.843807	0.838599	0.0327923	0.0296418	1.40615e-15	2683.6
NRF1_HUMAN.H10MO.A	8.72252	5.00826e-19	0.796875	0.785922	0.0593825	0.0627488	3.83865e-20	2729.24
CTCFL_HUMAN.H10MO.A	8.69141	5.46299e-19	0.812972	0.805507	0.0443127	0.042814	3.17264e-17	2701.3
AJ_GCM1::FIGLA_004	8.69804	5.49389e-19	0.816377	0.809722	0.0383945	0.038169	4.34104e-18	2709.64
AJ_ELK1::EOMES_001	8.68602	6.30283e-19	0.768027	0.762738	0.0301753	0.0303876	1.94052e-18	2713.58
AJ_TFAP2C::DLX3_002	8.68247	6.91788e-19	0.790314	0.78539	0.0273321	0.0283278	2.45255e-19	2722.76
HU0013_ZNF467	8.6152	1.35259e-18	0.860285	0.85191	0.0453501	0.0485989	3.56698e-20	2734.11
AJ_GCM1::ELK3_001	8.5913	1.51365e-18	0.784934	0.778437	0.0370713	0.037755	1.98885e-18	2717.11
TA0220_NFKB2_DBD_dimer	8.57345	1.64608e-18	0.803963	0.795949	0.047416	0.0466226	2.59052e-17	2706.37
MA0778.1 NFKB2	8.57345	1.64608e-18	0.803963	0.795949	0.047416	0.0466226	2.59052e-17	2706.37
AJ_ERF::HES7_003	8.58883	1.67458e-18	0.783136	0.777469	0.031125	0.0329718	1.11954e-19	2730.1
AJ_GCM2::HES7	8.58035	1.70084e-18	0.798424	0.792346	0.034417	0.0353712	1.14426e-18	2720.01
USF2_HUMAN.H10MO.A	8.5247	2.5235e-18	0.805457	0.798119	0.043808	0.0429285	4.82421e-17	2705.37
MA0753.1 ZNF740	8.52454	2.9665e-18	0.898737	0.888914	0.0543577	0.0575878	2.03234e-19	2730.13
TA0080_ZNF740_DBD_monomer	8.52248	3.01966e-18	0.898622	0.88879	0.0544354	0.0576544	2.11495e-19	2730.03
MA0119.1 NFIC::TLX1	8.49804	3.32125e-18	0.793924	0.786574	0.0432734	0.0431526	1.89015e-17	2710.58
MA0154.1 EBF1	8.49646	3.64228e-18	0.924883	0.918974	0.0335344	0.0347414	1.35903e-18	2722.62
AJ_GCM2::FIGLA_002	8.48257	3.97948e-18	0.81592	0.809785	0.0354579	0.0361122	5.12301e-18	2717.11
MA0145.1 Tcfcp2l1	8.47448	4.25037e-18	0.87807	0.872459	0.0325428	0.0330526	6.63896e-18	2716.25
AJ_RFX3::FIGLA_001	8.46603	4.65206e-18	0.761673	0.756287	0.0310318	0.031765	4.15862e-18	2718.73
SPIC_HUMAN.H10MO.D	8.46685	5.07304e-18	0.947631	0.943815	0.0209613	0.022536	1.15001e-19	2735.26
TA0086_Zfp740_DBD_monomer	8.45483	5.41356e-18	0.912943	0.904741	0.0460853	0.0484726	6.61437e-19	2727.66
AJ_E2F1::ELK1_003	8.45342	5.64556e-18	0.780646	0.774275	0.0352526	0.0376719	2.06637e-19	2733.12
ZN423_HUMAN.H10MO.D	8.45318	5.84071e-18	0.742897	0.735639	0.039479	0.0429396	5.38048e-20	2739.41
MA0062.2 Gabpa	8.4198	6.87893e-18	0.880488	0.872831	0.0446928	0.0453993	1.05164e-17	2716.29
MA0145.2 Tcfcp2l1	8.40528	7.8101e-18	0.877752	0.872181	0.0325742	0.0330851	1.20045e-17	2716.25
AJ_E2F3::EOMES	8.38092	9.41695e-18	0.752787	0.747387	0.0320693	0.0321565	3.47904e-17	2712.26
AJ_TFAP2C::DRGX	8.34115	1.34126e-17	0.815911	0.810535	0.03197	0.0321678	3.86185e-17	2713.32
AJ_ETV5::TCF3_002	8.34356	1.4675e-17	0.803487	0.797924	0.0312488	0.0333272	6.68193e-19	2732.43
ERR1_HUMAN.H10MO.D	8.33782	1.46792e-17	0.866985	0.861111	0.0338931	0.0351894	4.77146e-18	2723.33
GSC2_HUMAN.H10MO.D	8.33668	1.46926e-17	0.917907	0.913127	0.0277129	0.0286371	6.68501e-18	2721.78
MA0048.1 NHLH1	8.29584	2.23431e-17	0.869902	0.863088	0.0383313	0.0410582	7.58932e-19	2733.95
MA0524.1 TFAP2C	8.22683	4.28794e-17	0.88603	0.879796	0.0341596	0.0379099	1.04446e-19	2746.87
AJ_GCM1::NHLH1_002	8.21797	4.32297e-17	0.826635	0.8214	0.0298703	0.0318416	2.19818e-18	2732.26
MA0014.2 PAX5	8.19082	4.97145e-17	0.840275	0.836015	0.0256086	0.0259579	8.35701e-17	2715.62
AP2C_HUMAN.H10MO.A	8.19558	5.41001e-17	0.883346	0.876831	0.0365704	0.0397529	6.6346e-19	2739.2
SRBP2_HUMAN.H10MO.B	8.17323	6.25041e-17	0.896978	0.891317	0.0327036	0.03461	5.47621e-18	2729.76
MA0112.2 ESR1	8.10362	1.0577e-16	0.779315	0.773635	0.0342654	0.0349968	1.06318e-16	2718.01
GABPA_HUMAN.H10MO.A	8.09811	1.13315e-16	0.874325	0.867669	0.0397054	0.041053	5.05022e-17	2721.97
BHE41_HUMAN.H10MO.D	8.02906	2.01861e-16	0.870086	0.86506	0.0302828	0.0312608	1.00521e-16	2721.45
E2F4_HUMAN.H10MO.A	7.99315	2.71848e-16	0.854119	0.848214	0.0357857	0.0368965	1.46874e-16	2721.05
BU0025 Glis2_primary	7.99484	2.72479e-16	0.842467	0.837091	0.0322711	0.0335851	7.97729e-17	2724.12
MA0154.3 EBF1	7.95606	3.47019e-16	0.827849	0.821104	0.0425003	0.0422942	1.72203e-15	2709.96
TA0109_EBF1_full_dimer	7.94571	3.78074e-16	0.827798	0.821063	0.0425019	0.0422903	1.88145e-15	2709.92
AJ_GCM2::ELK1	7.90994	5.26962e-16	0.821038	0.815867	0.0321621	0.0326372	7.77111e-16	2715.97
PKNX2_HUMAN.H10MO.D	7.90404	5.90024e-16	0.886566	0.882004	0.0273772	0.0288415	7.92833e-17	2728.21
ZBTB4_HUMAN.H10MO.D	7.886	6.14183e-16	0.778761	0.773076	0.0363089	0.0359608	3.91157e-15	2708.52
HU0020_ZNF519	7.88321	6.24431e-16	0.795737	0.78923	0.0417174	0.0411754	4.8649e-15	2707.49
NFIA_HUMAN.H10MO.C	7.88818	6.37313e-16	0.8219	0.816192	0.0353862	0.0361281	6.4178e-16	2717.9
AJ_GCM1::FIGLA_009	7.85812	8.2114e-16	0.815485	0.809823	0.0351066	0.0359764	6.54253e-16	2719.09
HINFP_HUMAN.H10MO.C	7.82563	1.07765e-15	0.805971	0.8005	0.0339484	0.0349114	6.90445e-16	2720.21
TA0351_HEY1_DBD_dimer	7.82412	1.16762e-15	0.855739	0.847878	0.0468493	0.0502241	5.13985e-17	2734.24
[truncated: 2,754 more rows]

## Sheet: Cluster4
MATRIX_ID	Z_SCORE	P_VALUE	SAMPLE_AVERAGE	BACKGROUND_AVERAGE	SAMPLE_STDDEV	BACKGROUND_STDDEV	P_WELCH	df_WELCH
[truncated: 3,042 more rows]

[truncated: 4 more sheets: Cluster5, Cluster6, Cluster7, Cluster8]
